# Supplementary material for: Carbene-Catalyzed Atroposelective Synthesis of Axially Chiral Styrenes Bearing Acyclic Alkenes
Source: Research Square preprint supplement (doi:10.21203/rs.3.rs-739850/v1), 2021-07-28
Supplement: Supplementary file 1 [file e02b221d7b0673432836ded0.docx]

Supplementary Information

Carbene-Catalyzed Atroposelective Synthesis of Axially Chiral Styrenes Bearing Acyclic Alkenes

Jia-Lei Yan,1† Rakesh Maiti,1† Shi-Chao Ren,1 Weiyi Tian,2* Tingting Li,3 Jun Xu,1,2 Bivas Mondal,1 Zhichao Jin,3 and Yonggui Robin Chi1,3*

† These authors contributed equally to this work.

* Corresponding author. Email: [robinchi@ntu.edu.sg](mailto:robinchi@ntu.edu.sg) (Y.R.C.); [tianweiyi@gzy.edu.cn](mailto:tianweiyi@gzy.edu.cn) (W.T.)

**Table of Contents**

[1. SupplementaryFigures 2](#_Toc77791385)

[2. Supplementary Methods 117](#_Toc77791386)

[2.1 General Information 117](#_Toc77791387)

[2.2 Preparation of the NHC Pre-catalysts 118](#_Toc77791388)

[2.3 Preparation of the Sulfinic Acids 119](#_Toc77791389)

[2.4 Preparation of the Ynals 119](#_Toc77791390)

[3. Supplementary Results of Condition Optimization 127](#_Toc77791391)

[4. Proposed Reaction Mechanism 129](#_Toc77791392)

[5. Supplementary Data of the Products 130](#_Toc77791393)

[5.1 Characterization of the Axially Chiral Styrenes 130](#_Toc77791394)

[5.2 Further Transformations of the Products 145](#_Toc77791395)

[6. Supplementary Data for DFT Calculations on the Rotation Barrier 153](#_Toc77791396)

[7. Supplementary Data for Experimental Racemization Studies 159](#_Toc77791397)

[8. Supplementary References 163](#_Toc77791398)

## **1. SupplementaryFigures**


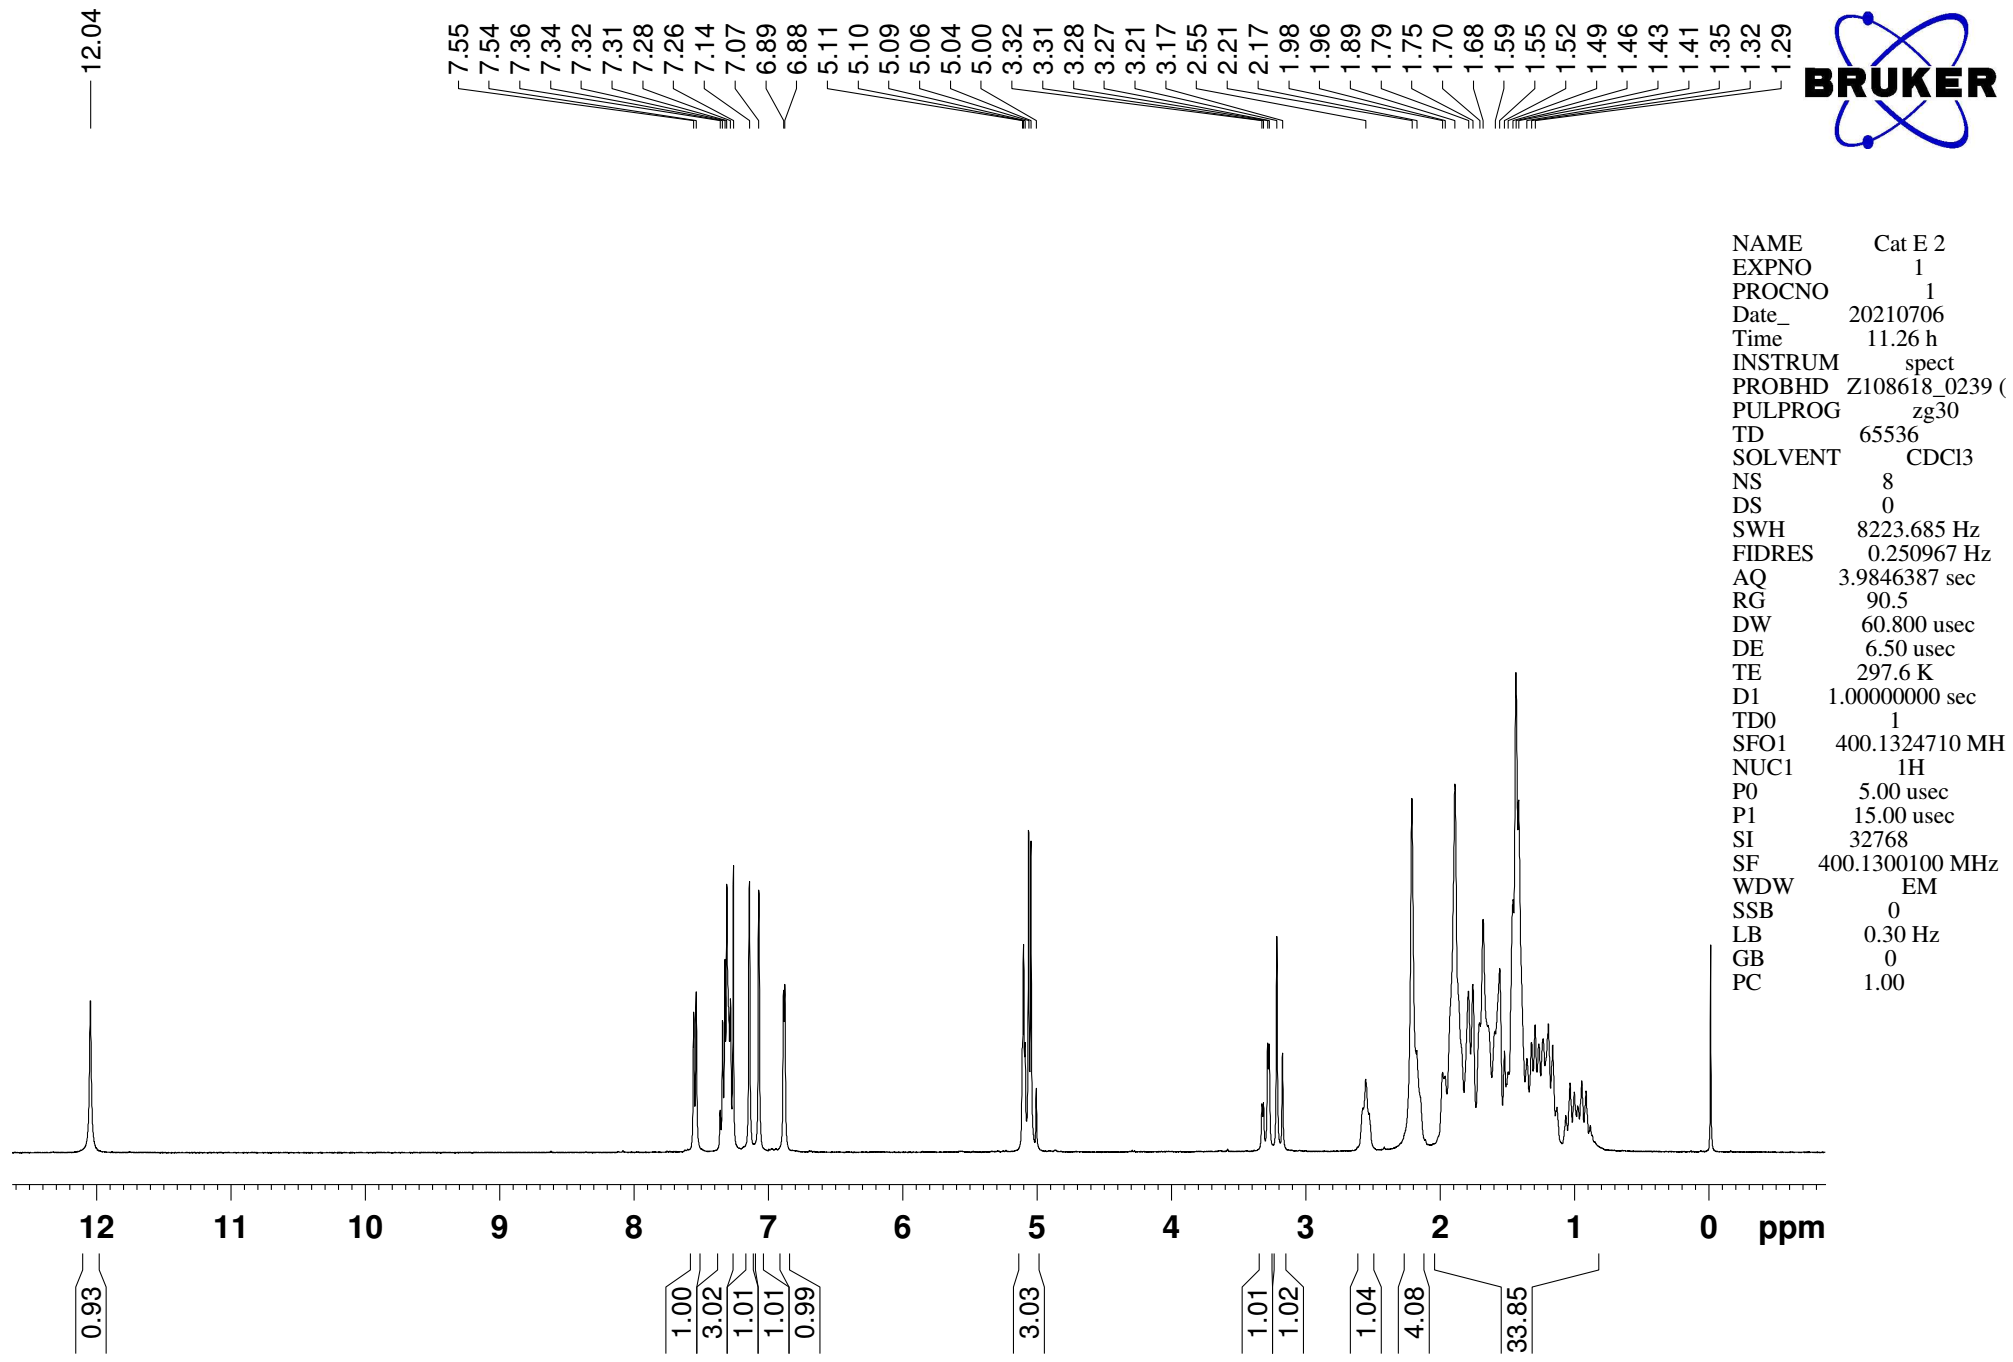


Supplementary Figure 1. 1H NMR (CDCl3, 400MHz) spectra of NHC pre-catalyst E


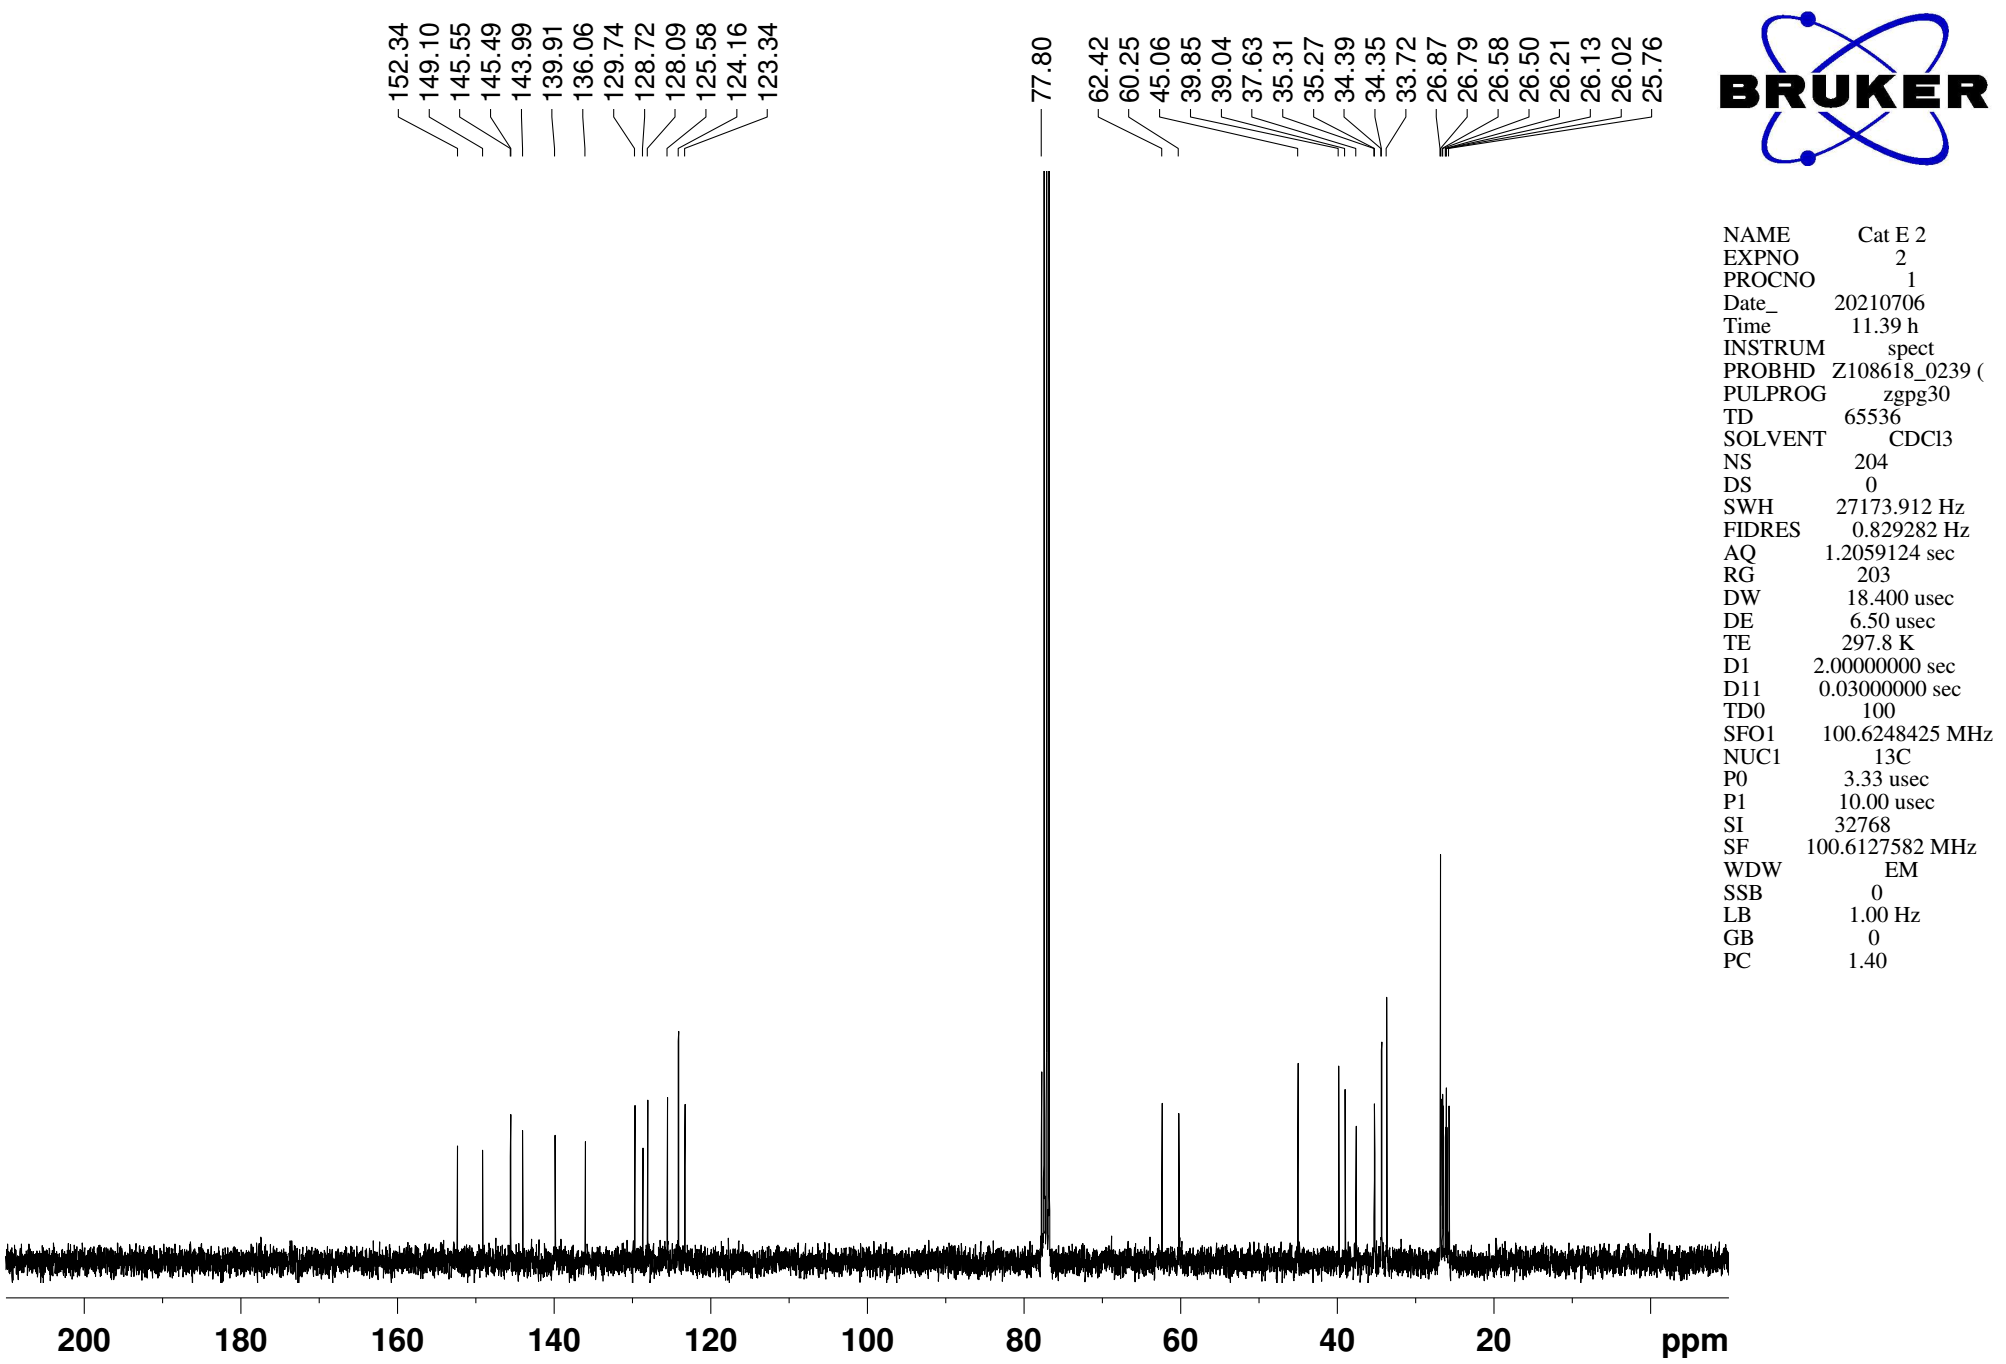


Supplementary Figure 2. 13C NMR (CDCl3, 101MHz) spectra of NHC pre-catalyst E


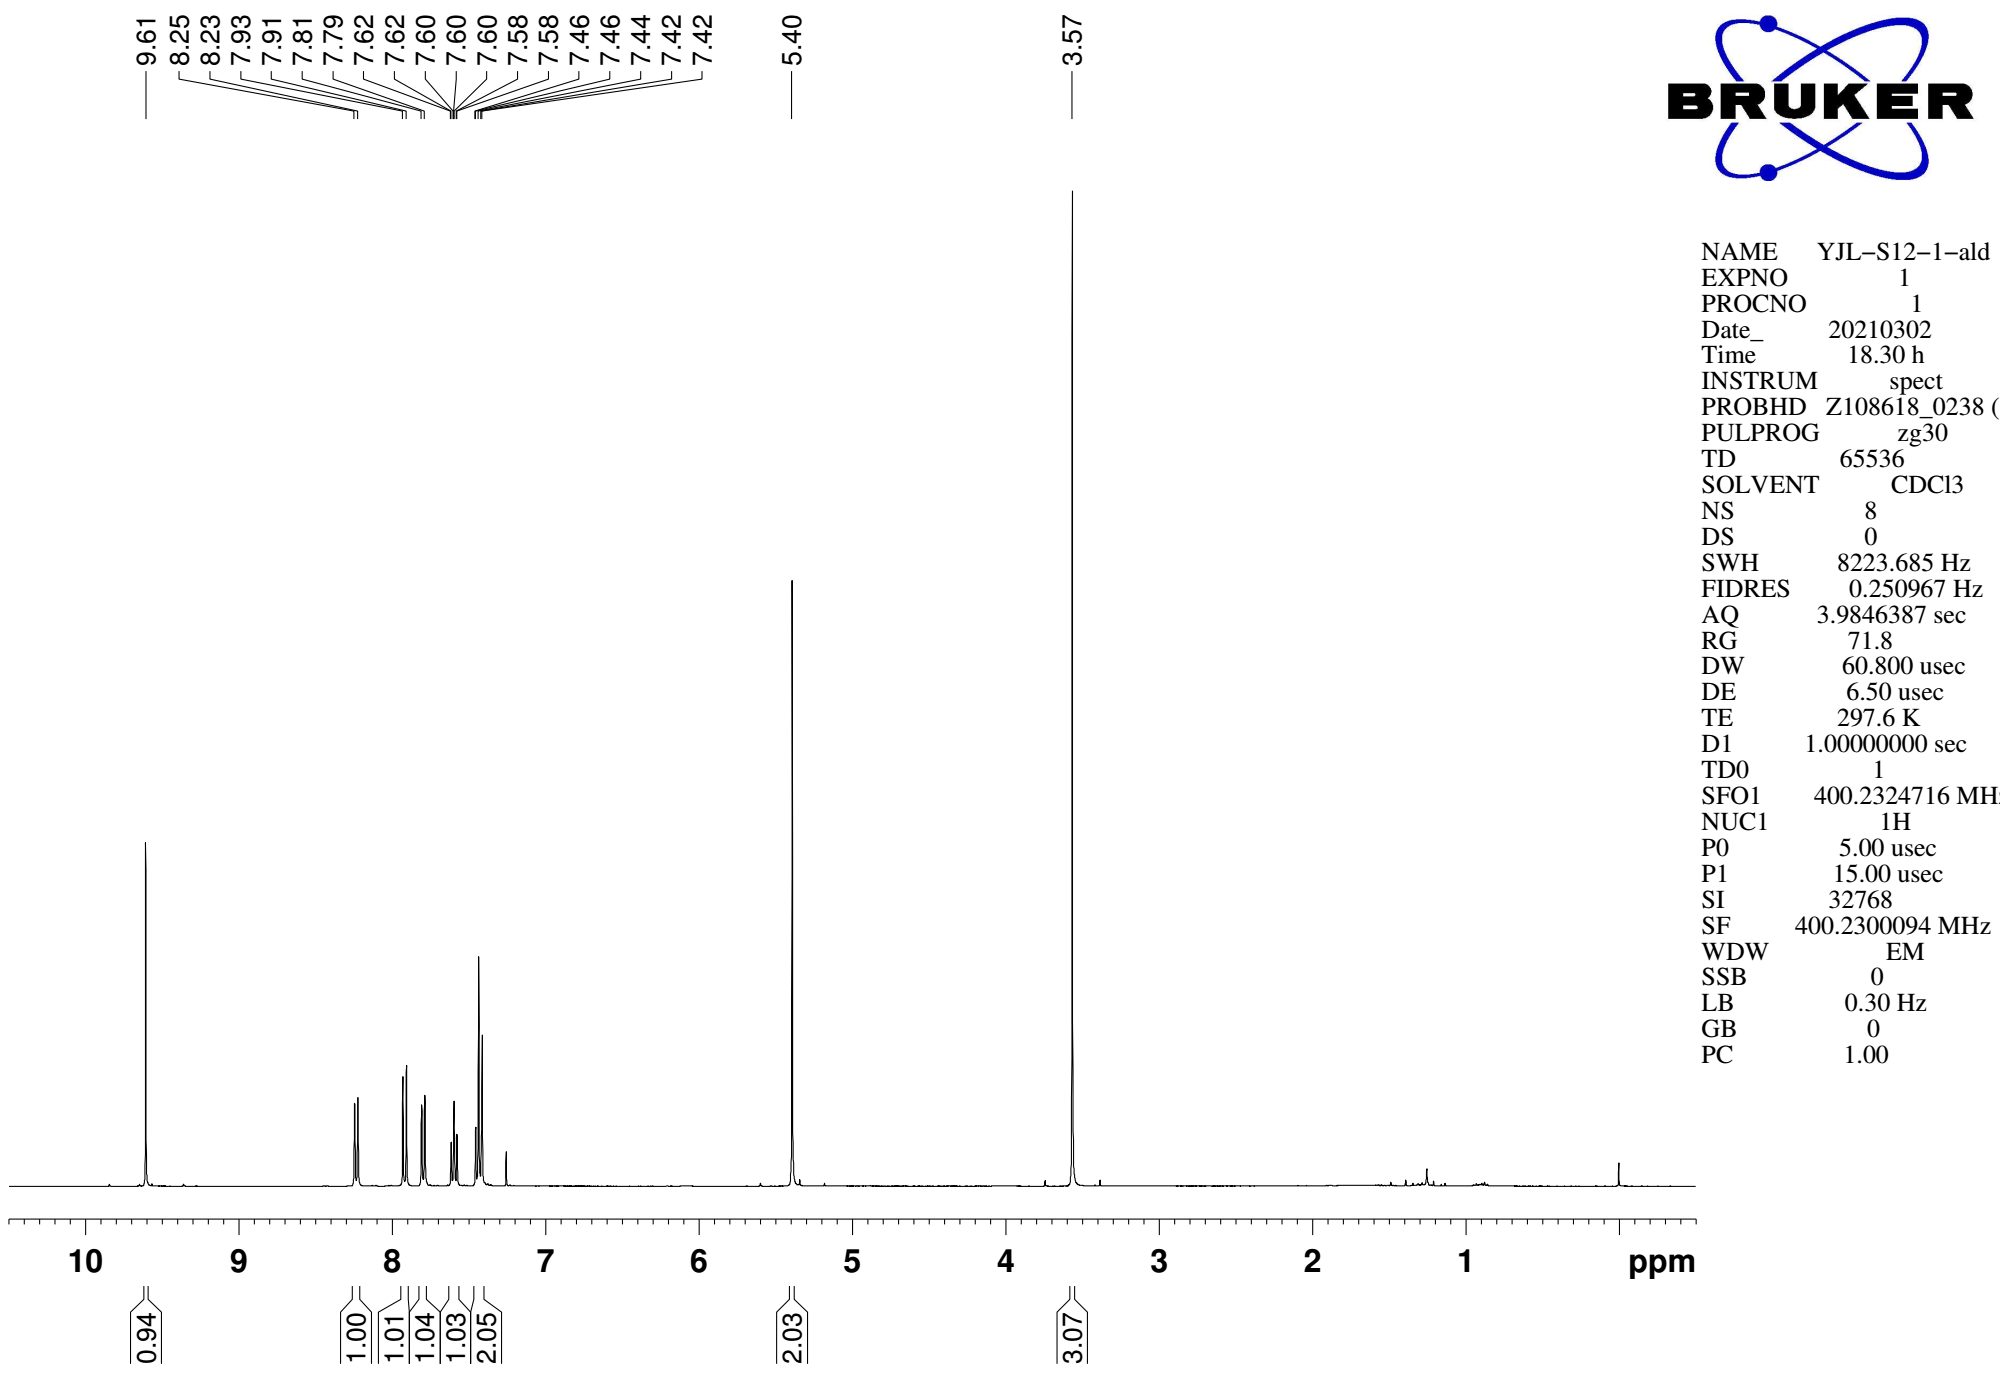


Supplementary Figure 3. 1H NMR (CDCl3, 400MHz) spectra of substrate 1o


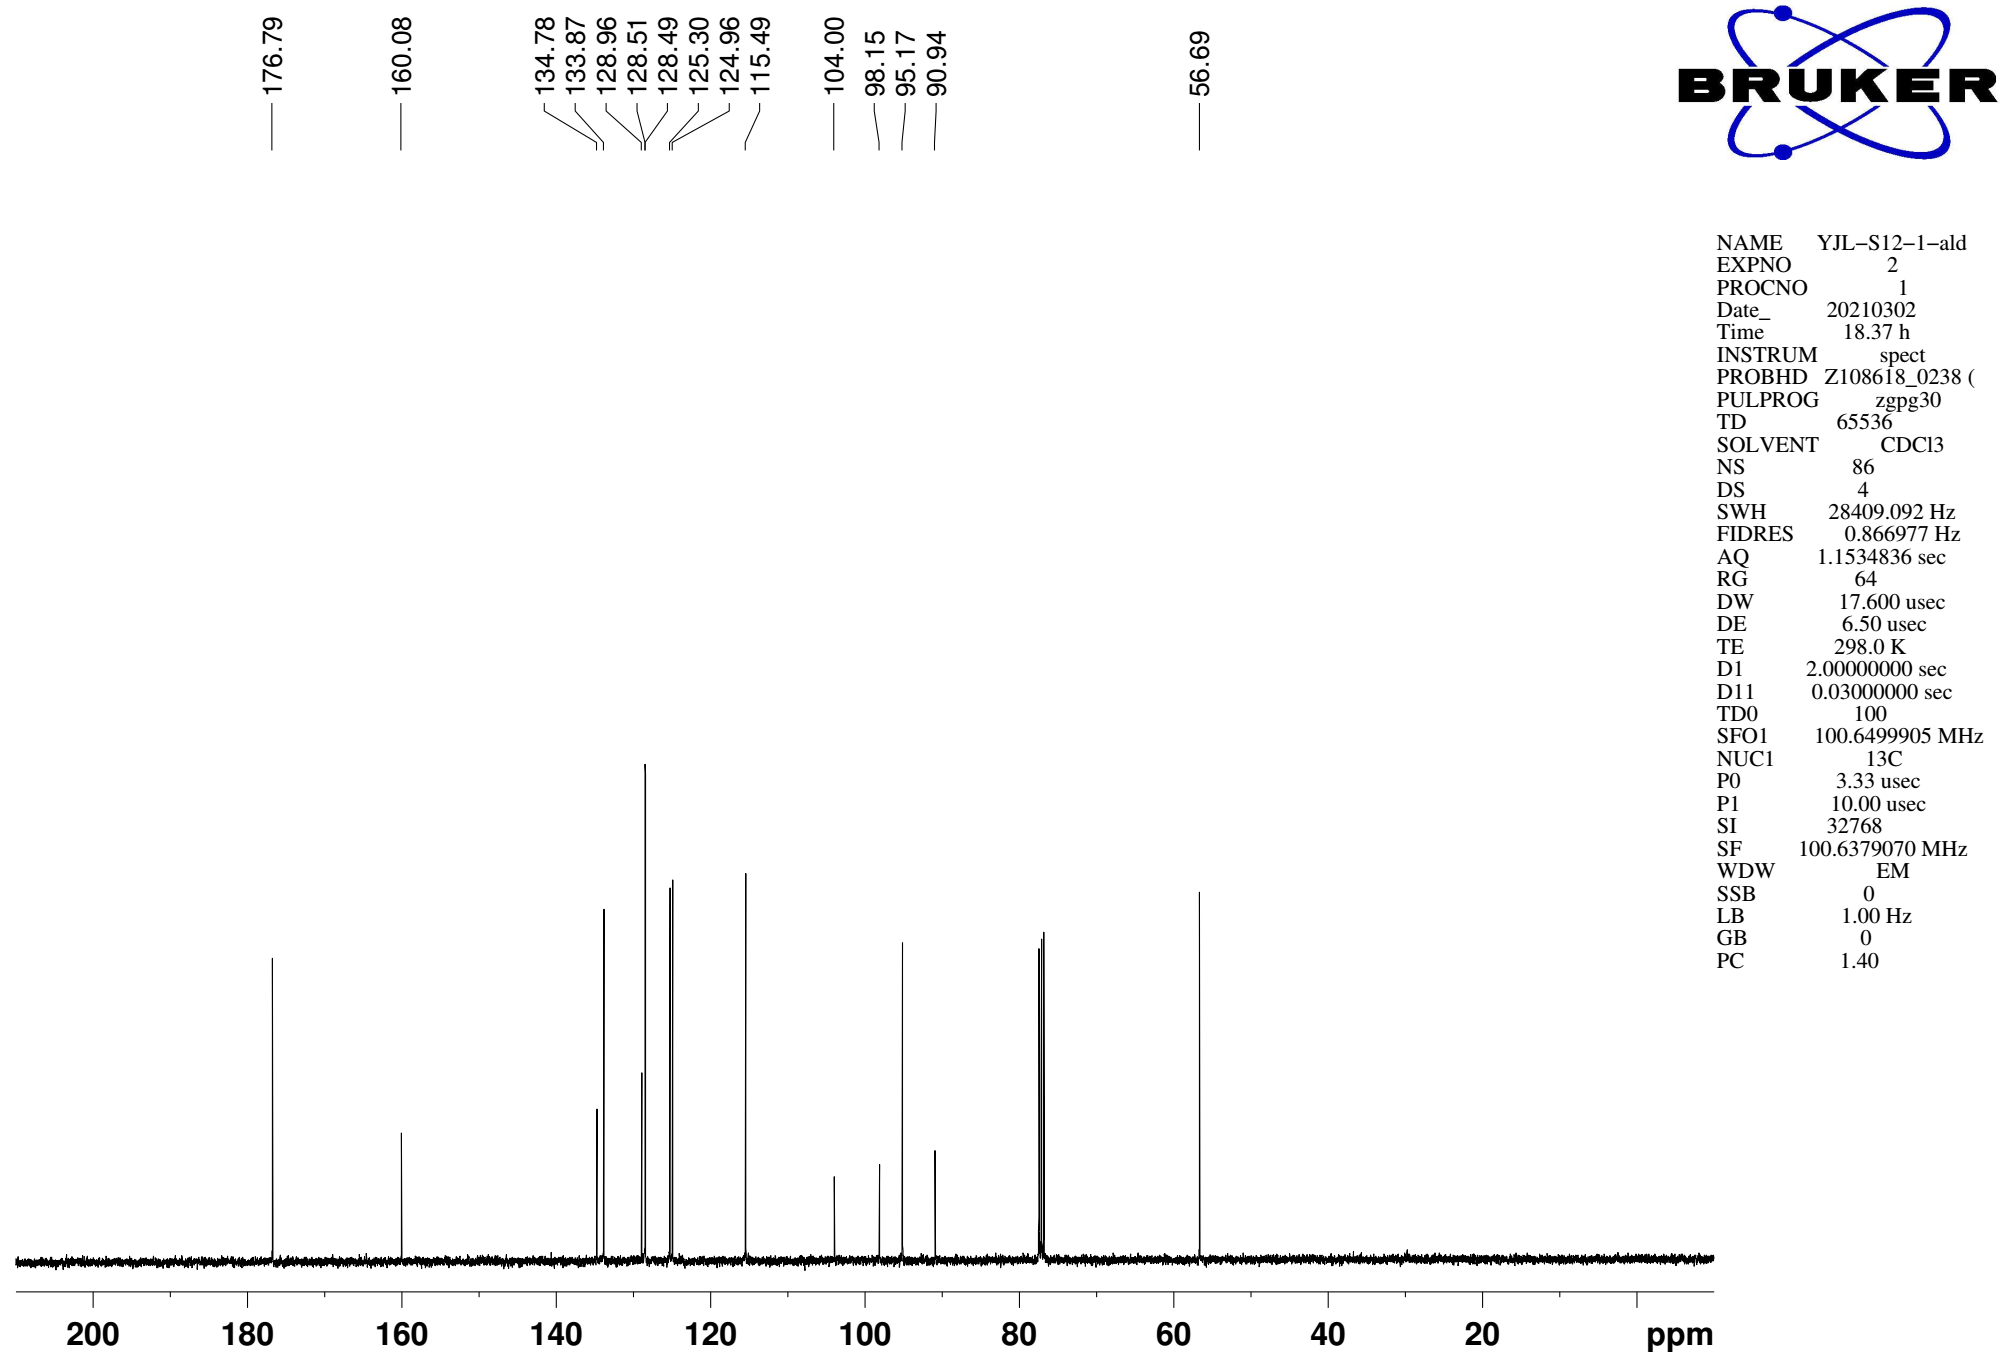


Supplementary Figure 4. 13C NMR (CDCl3, 101MHz) spectra of spectra of substrate 1o


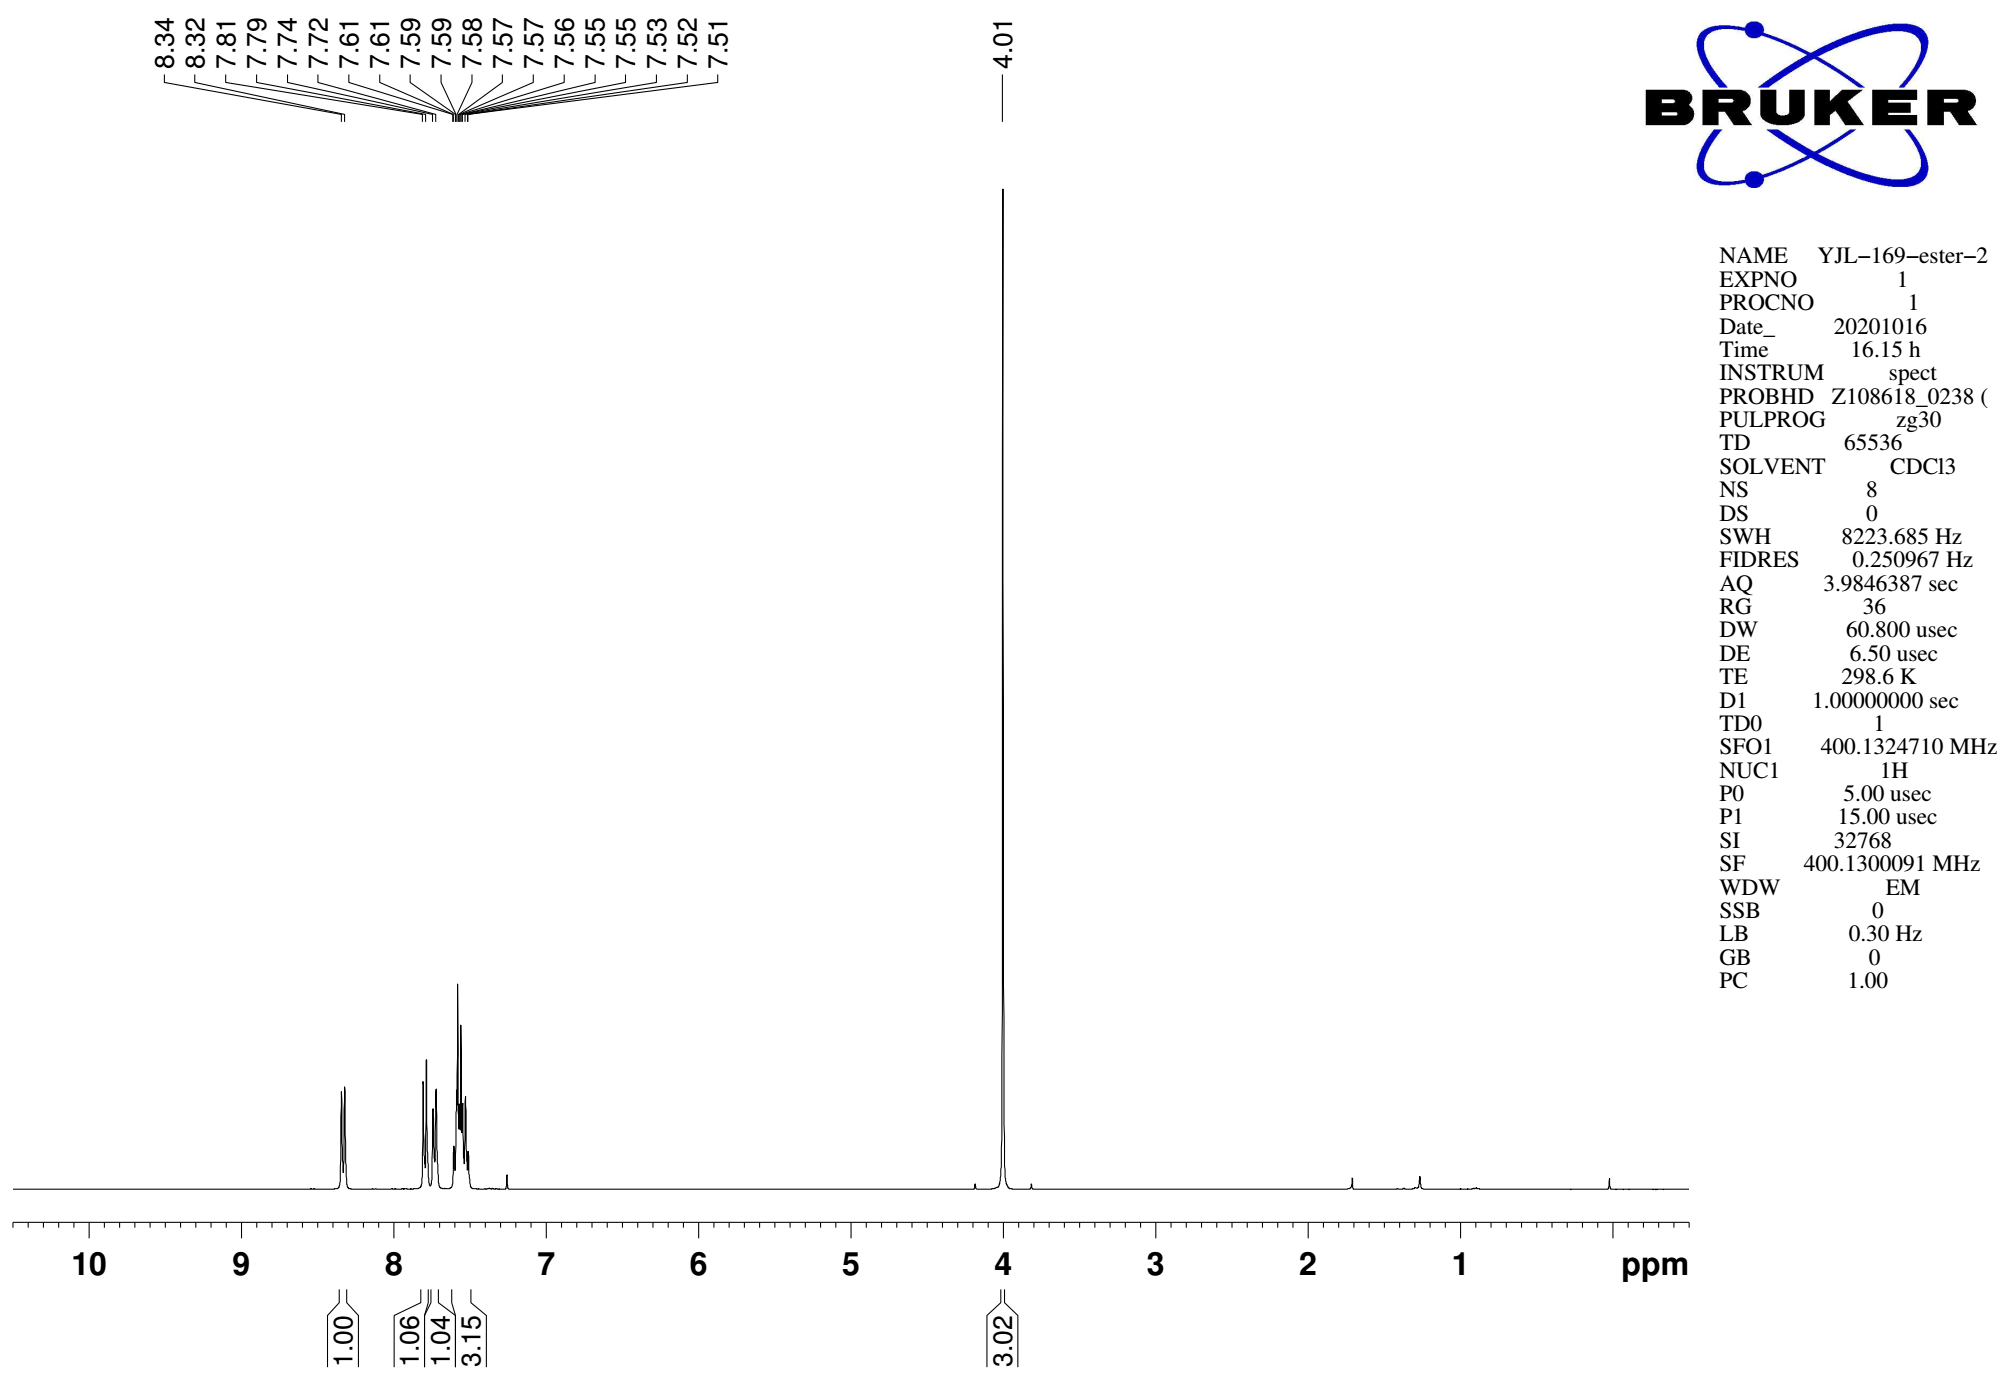


Supplementary Figure 5. 1H NMR (CDCl3, 400MHz) spectra of S12


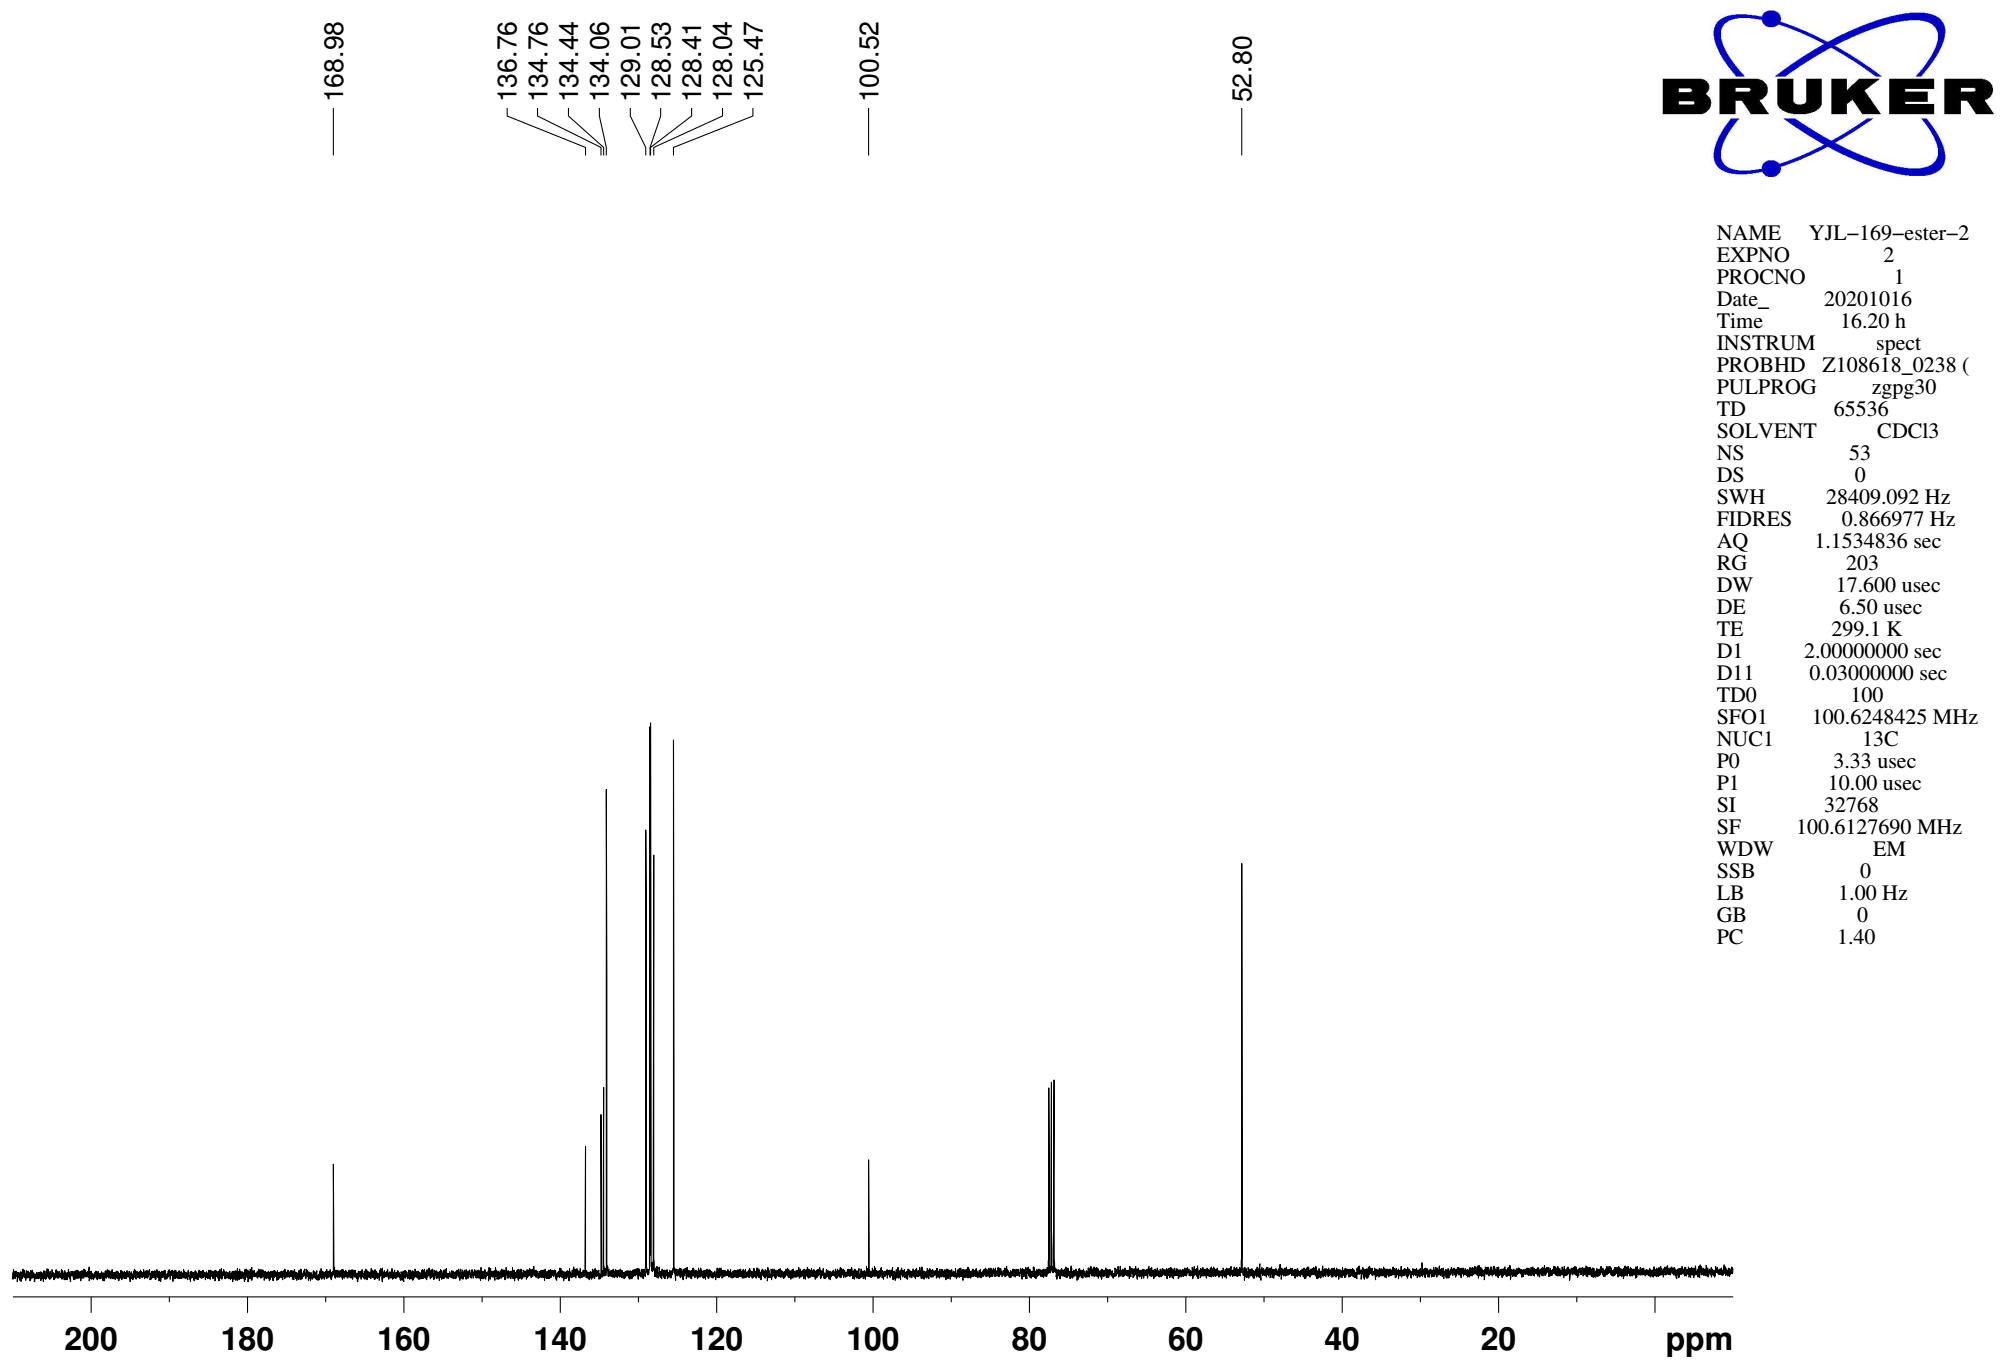


Supplementary Figure 6. 13C NMR (CDCl3, 101MHz) spectra of spectra of S12


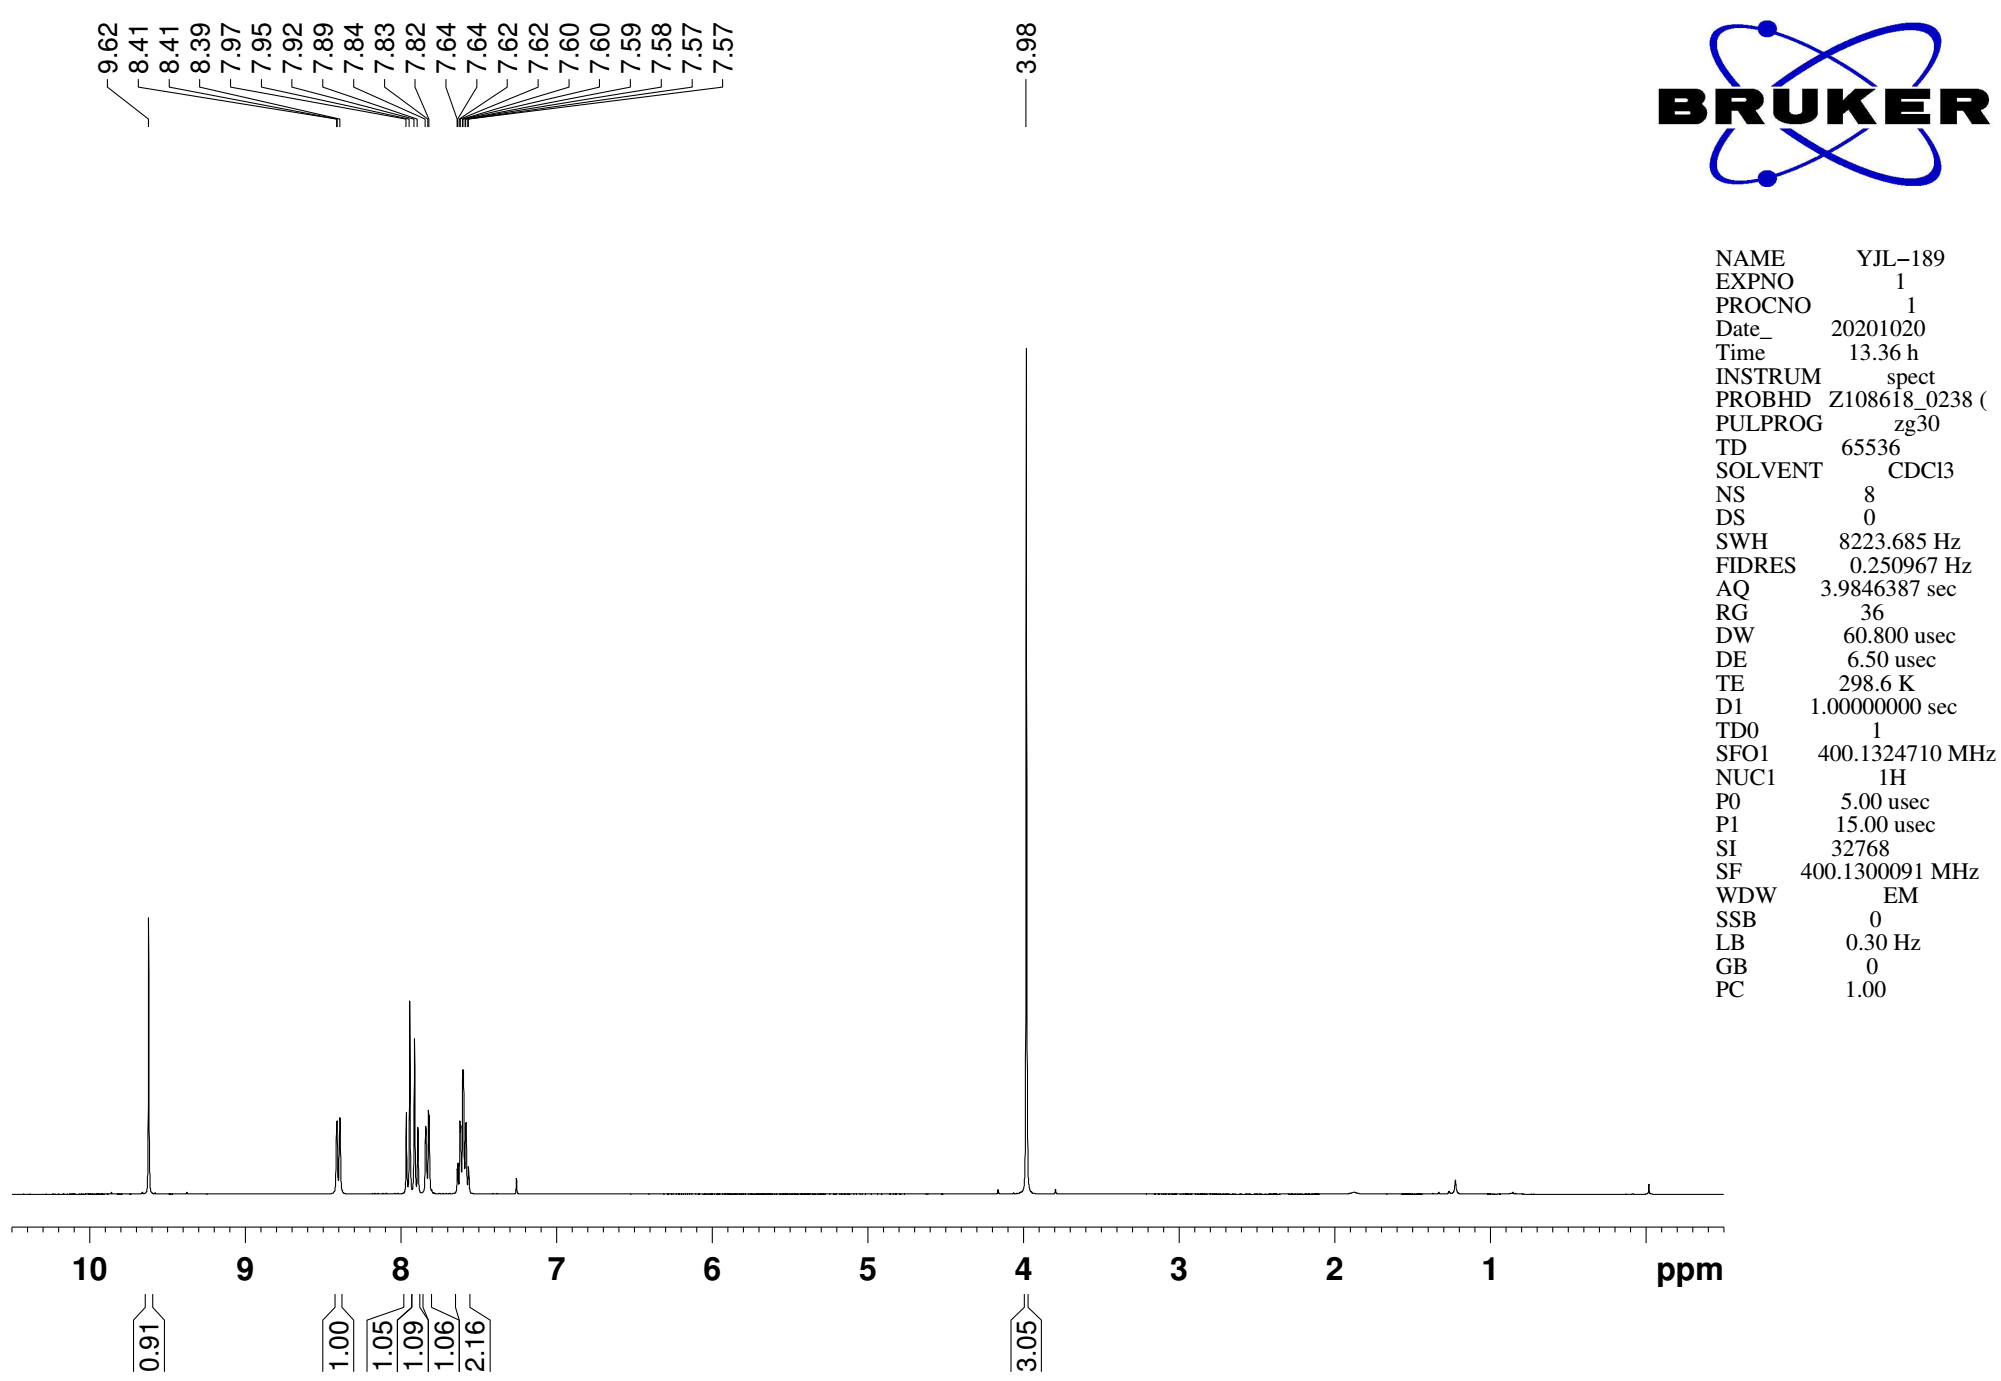


Supplementary Figure 7. 1H NMR (CDCl3, 400MHz) spectra of substrate 1p


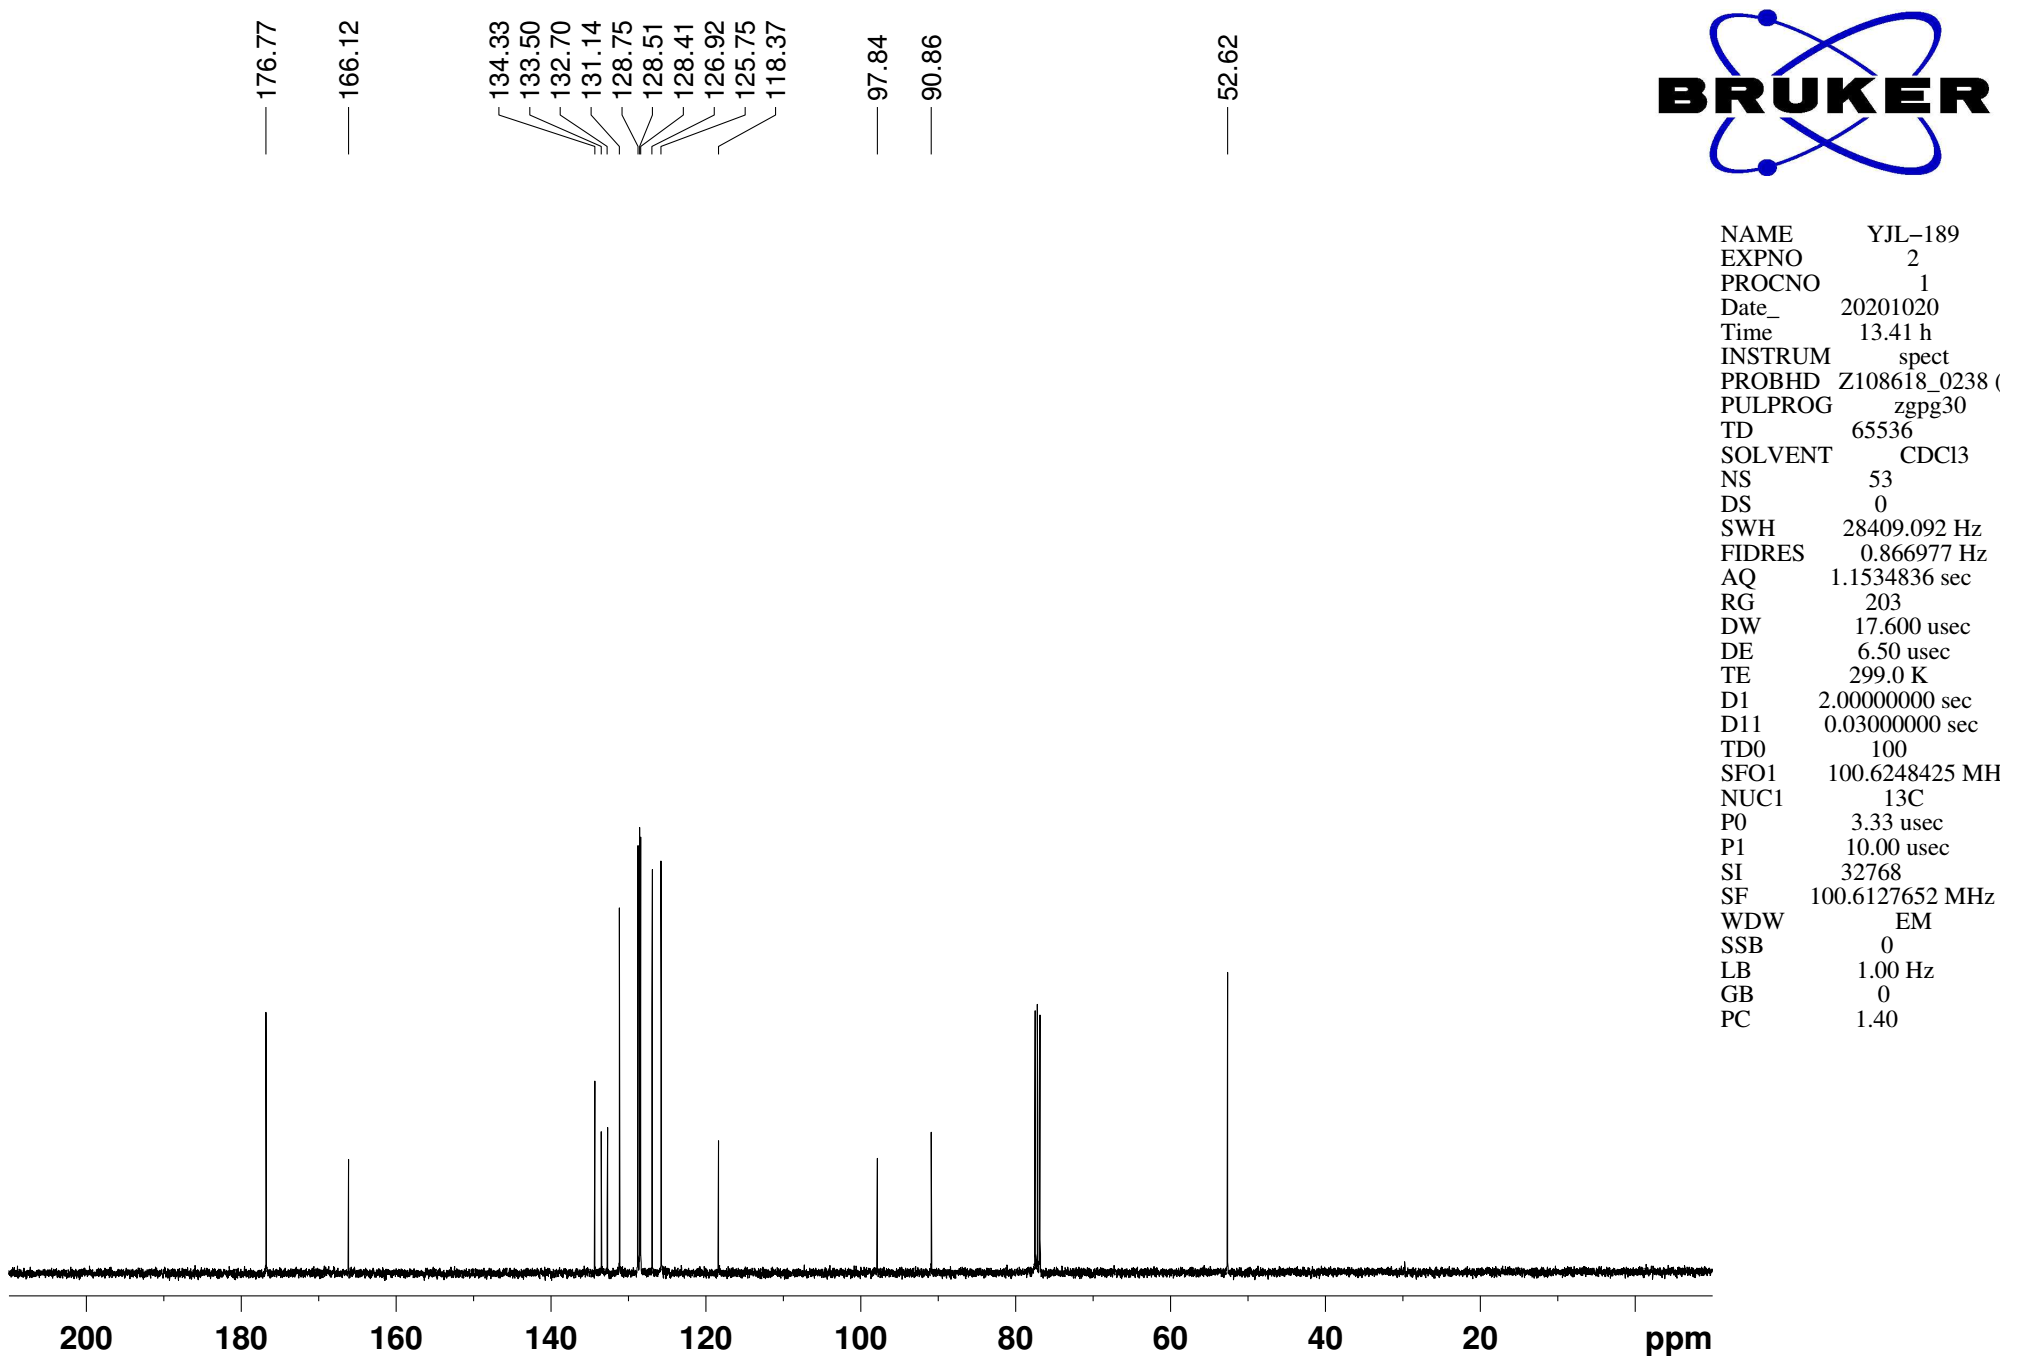


Supplementary Figure 8. 13C NMR (CDCl3, 101MHz) spectra of spectra of substrate 1p


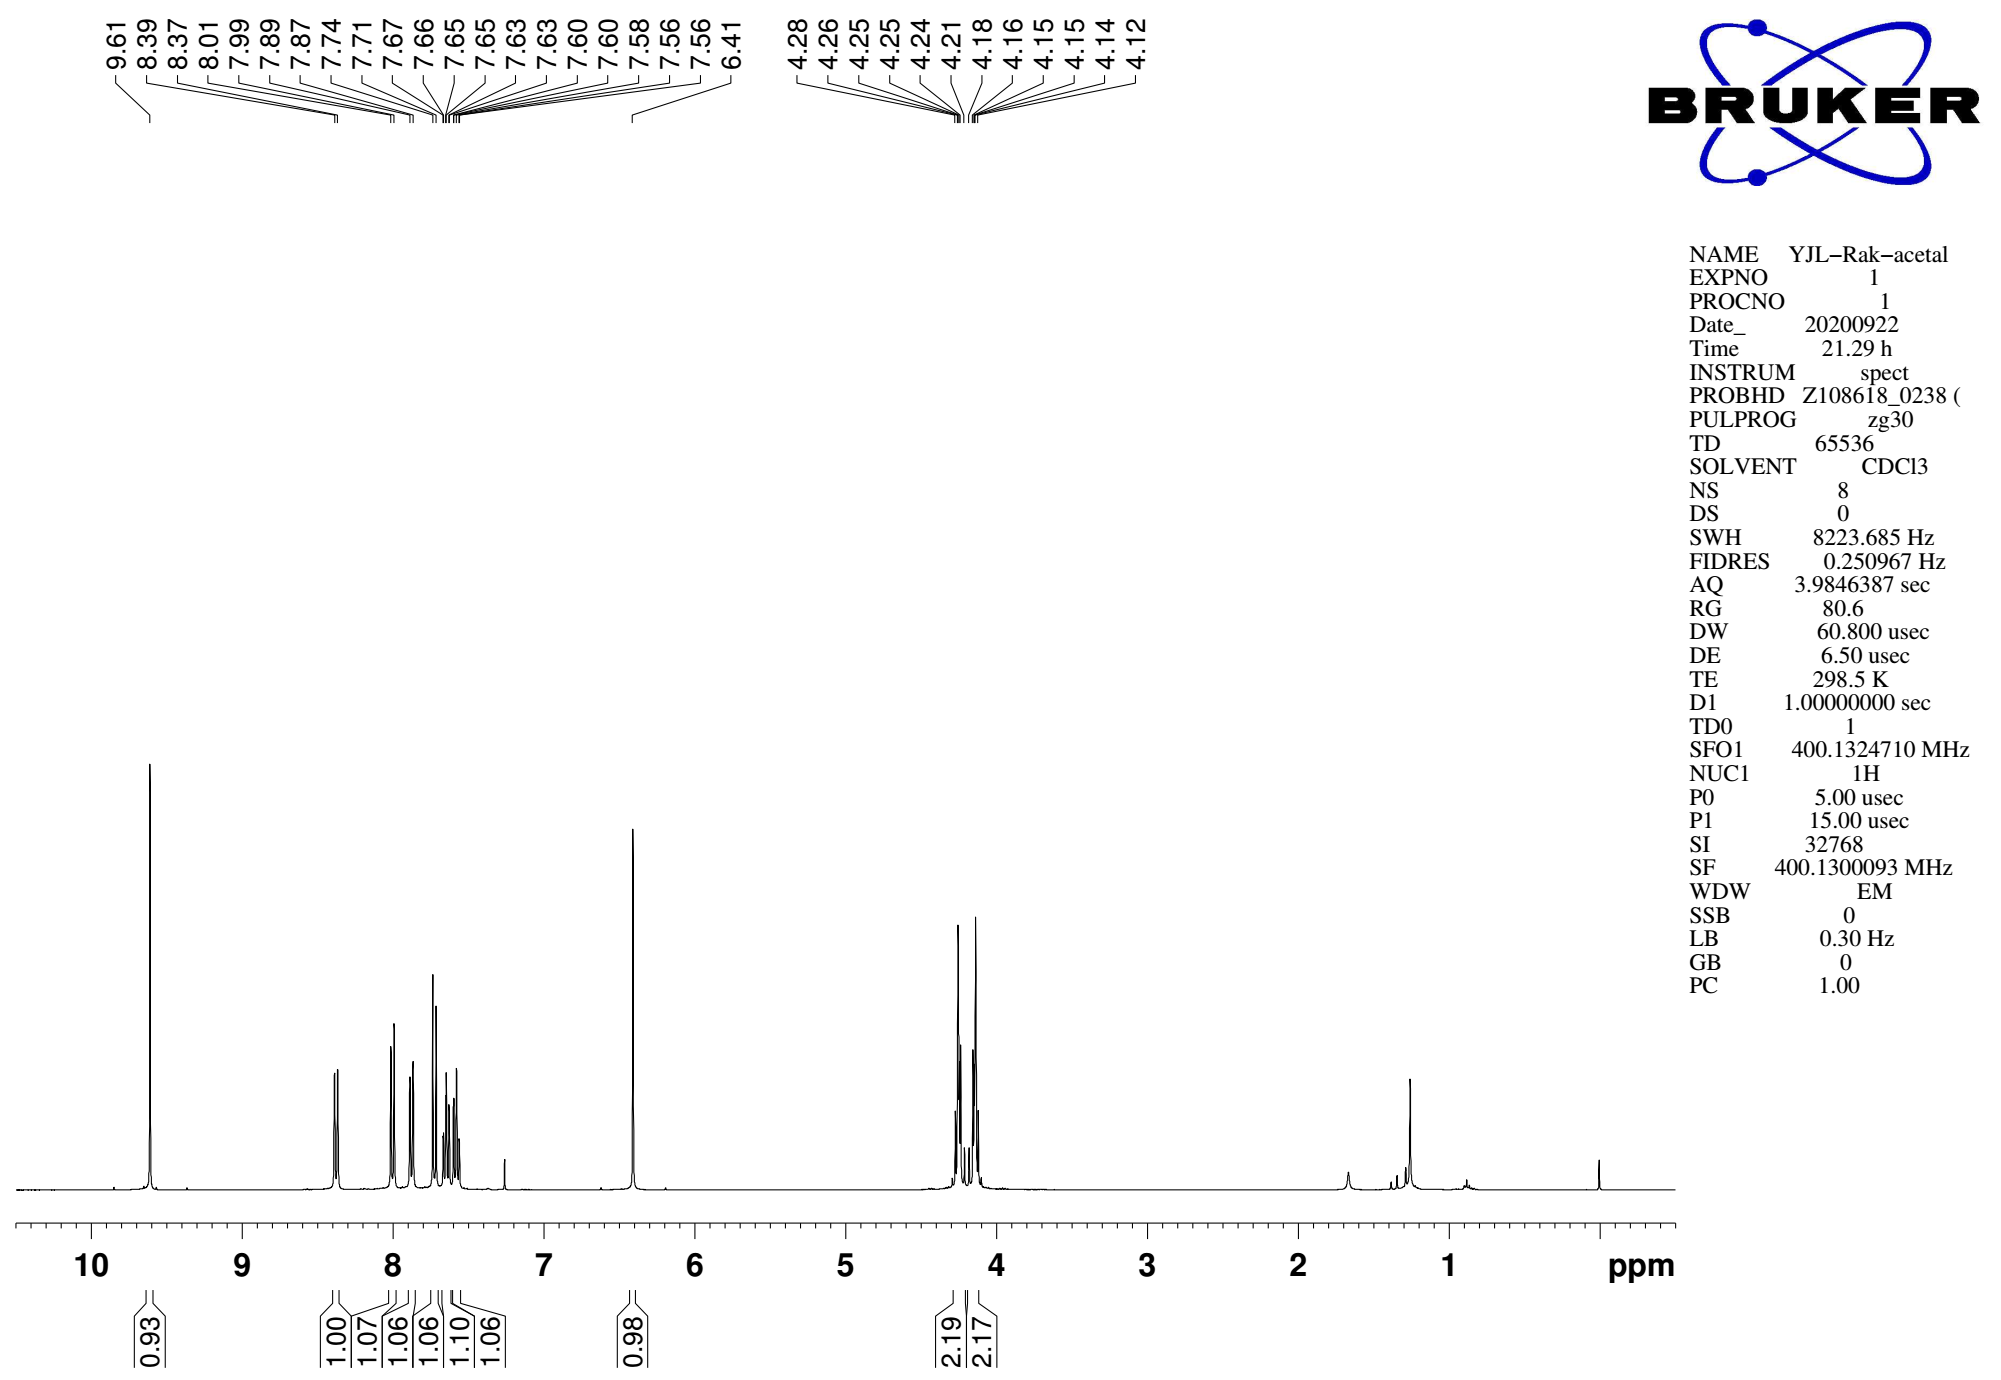


Supplementary Figure 9. 1H NMR (CDCl3, 400MHz) spectra of substrate 1q


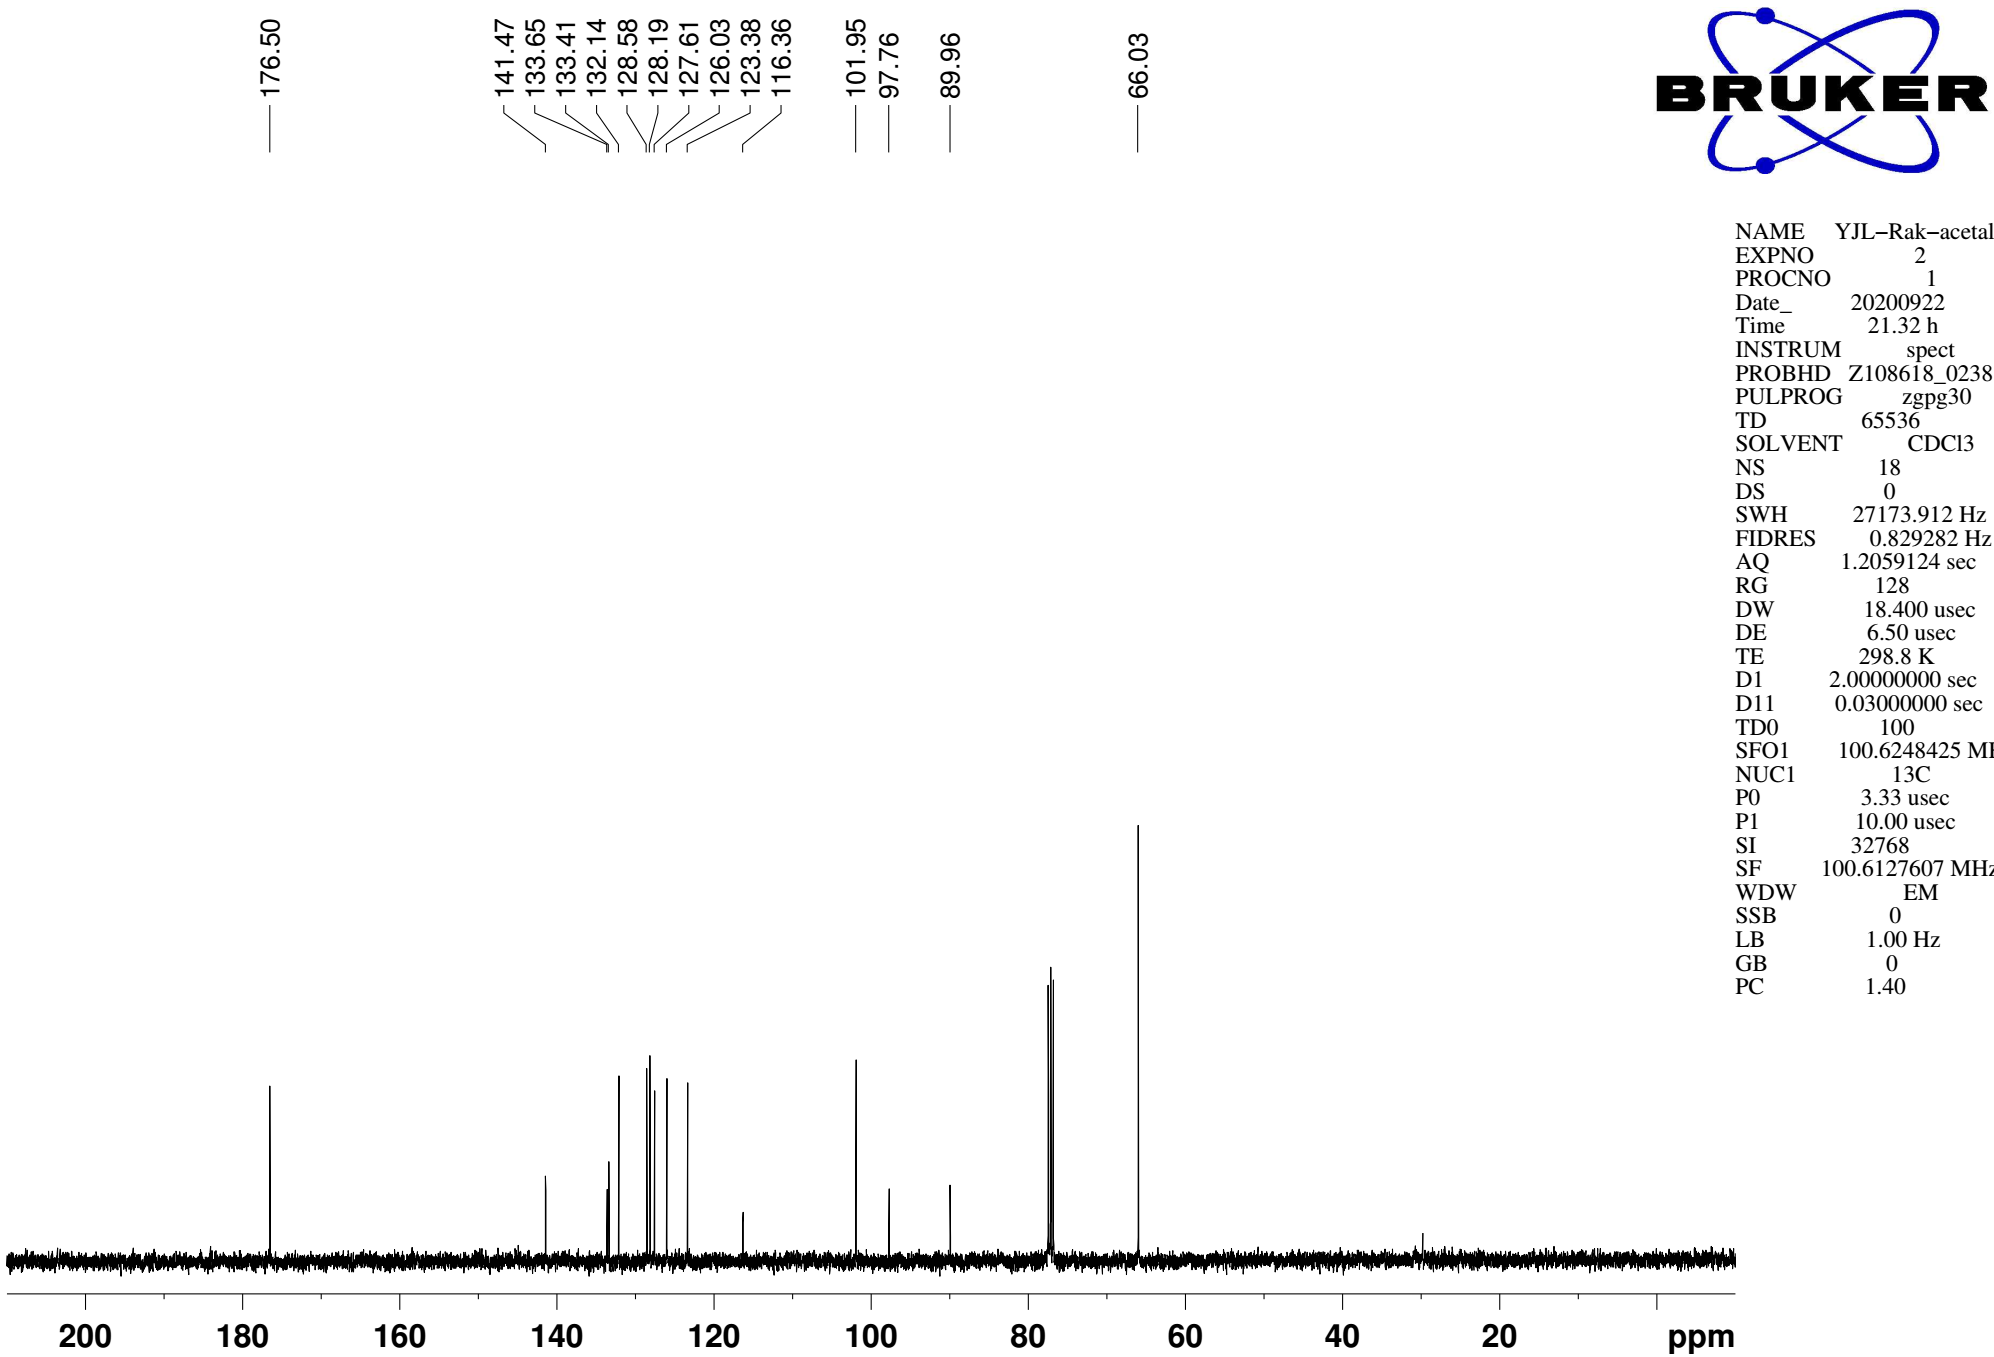


Supplementary Figure 10. 13C NMR (CDCl3, 101MHz) spectra of spectra of substrate 1q


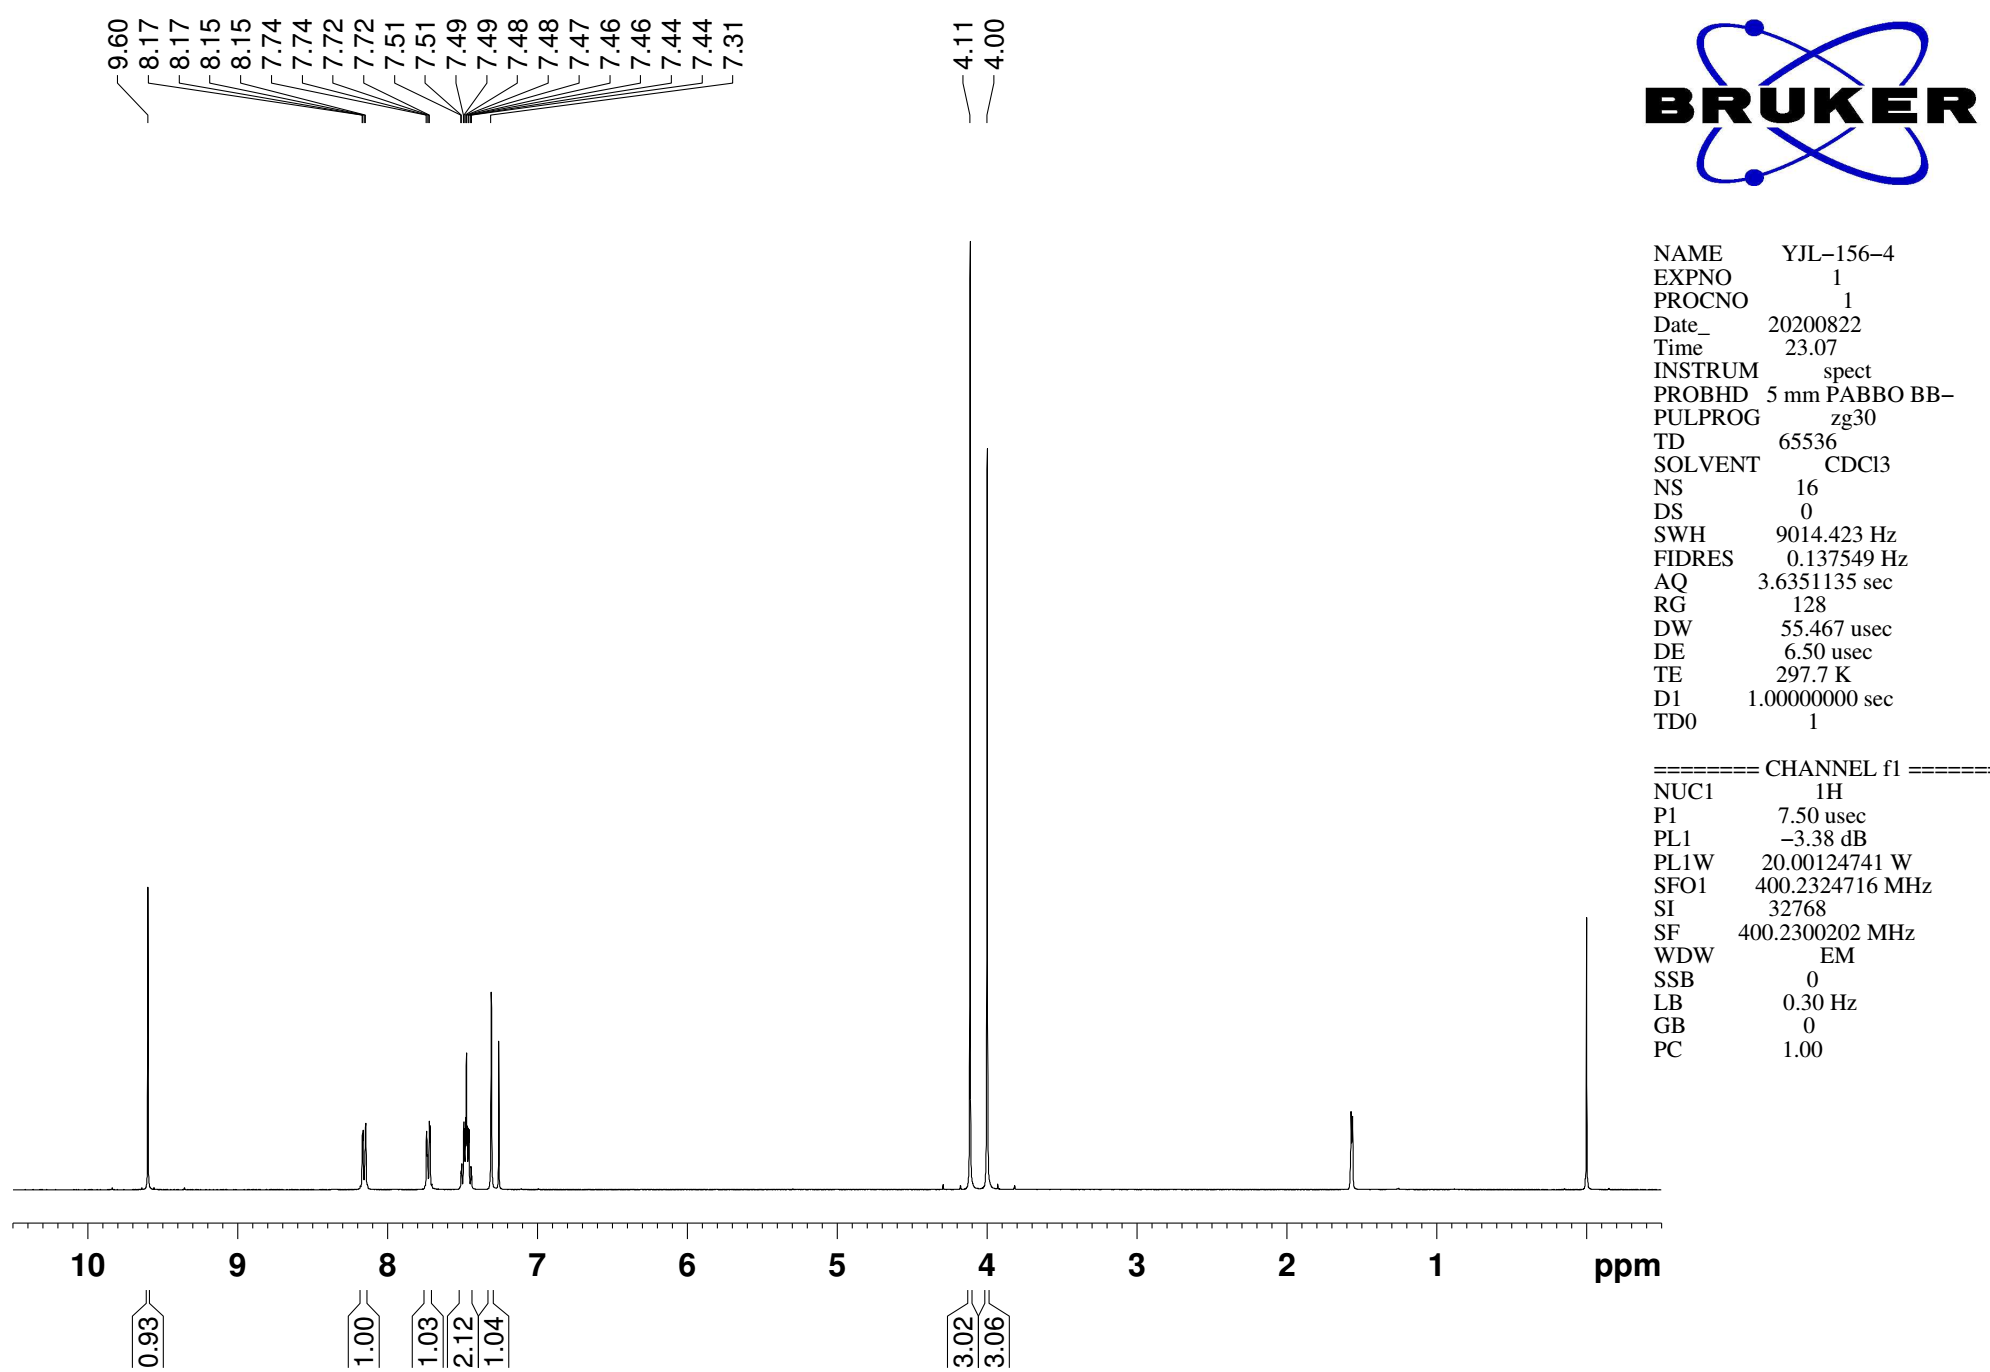


Supplementary Figure 11. 1H NMR (CDCl3, 400MHz) spectra of substrate 1r


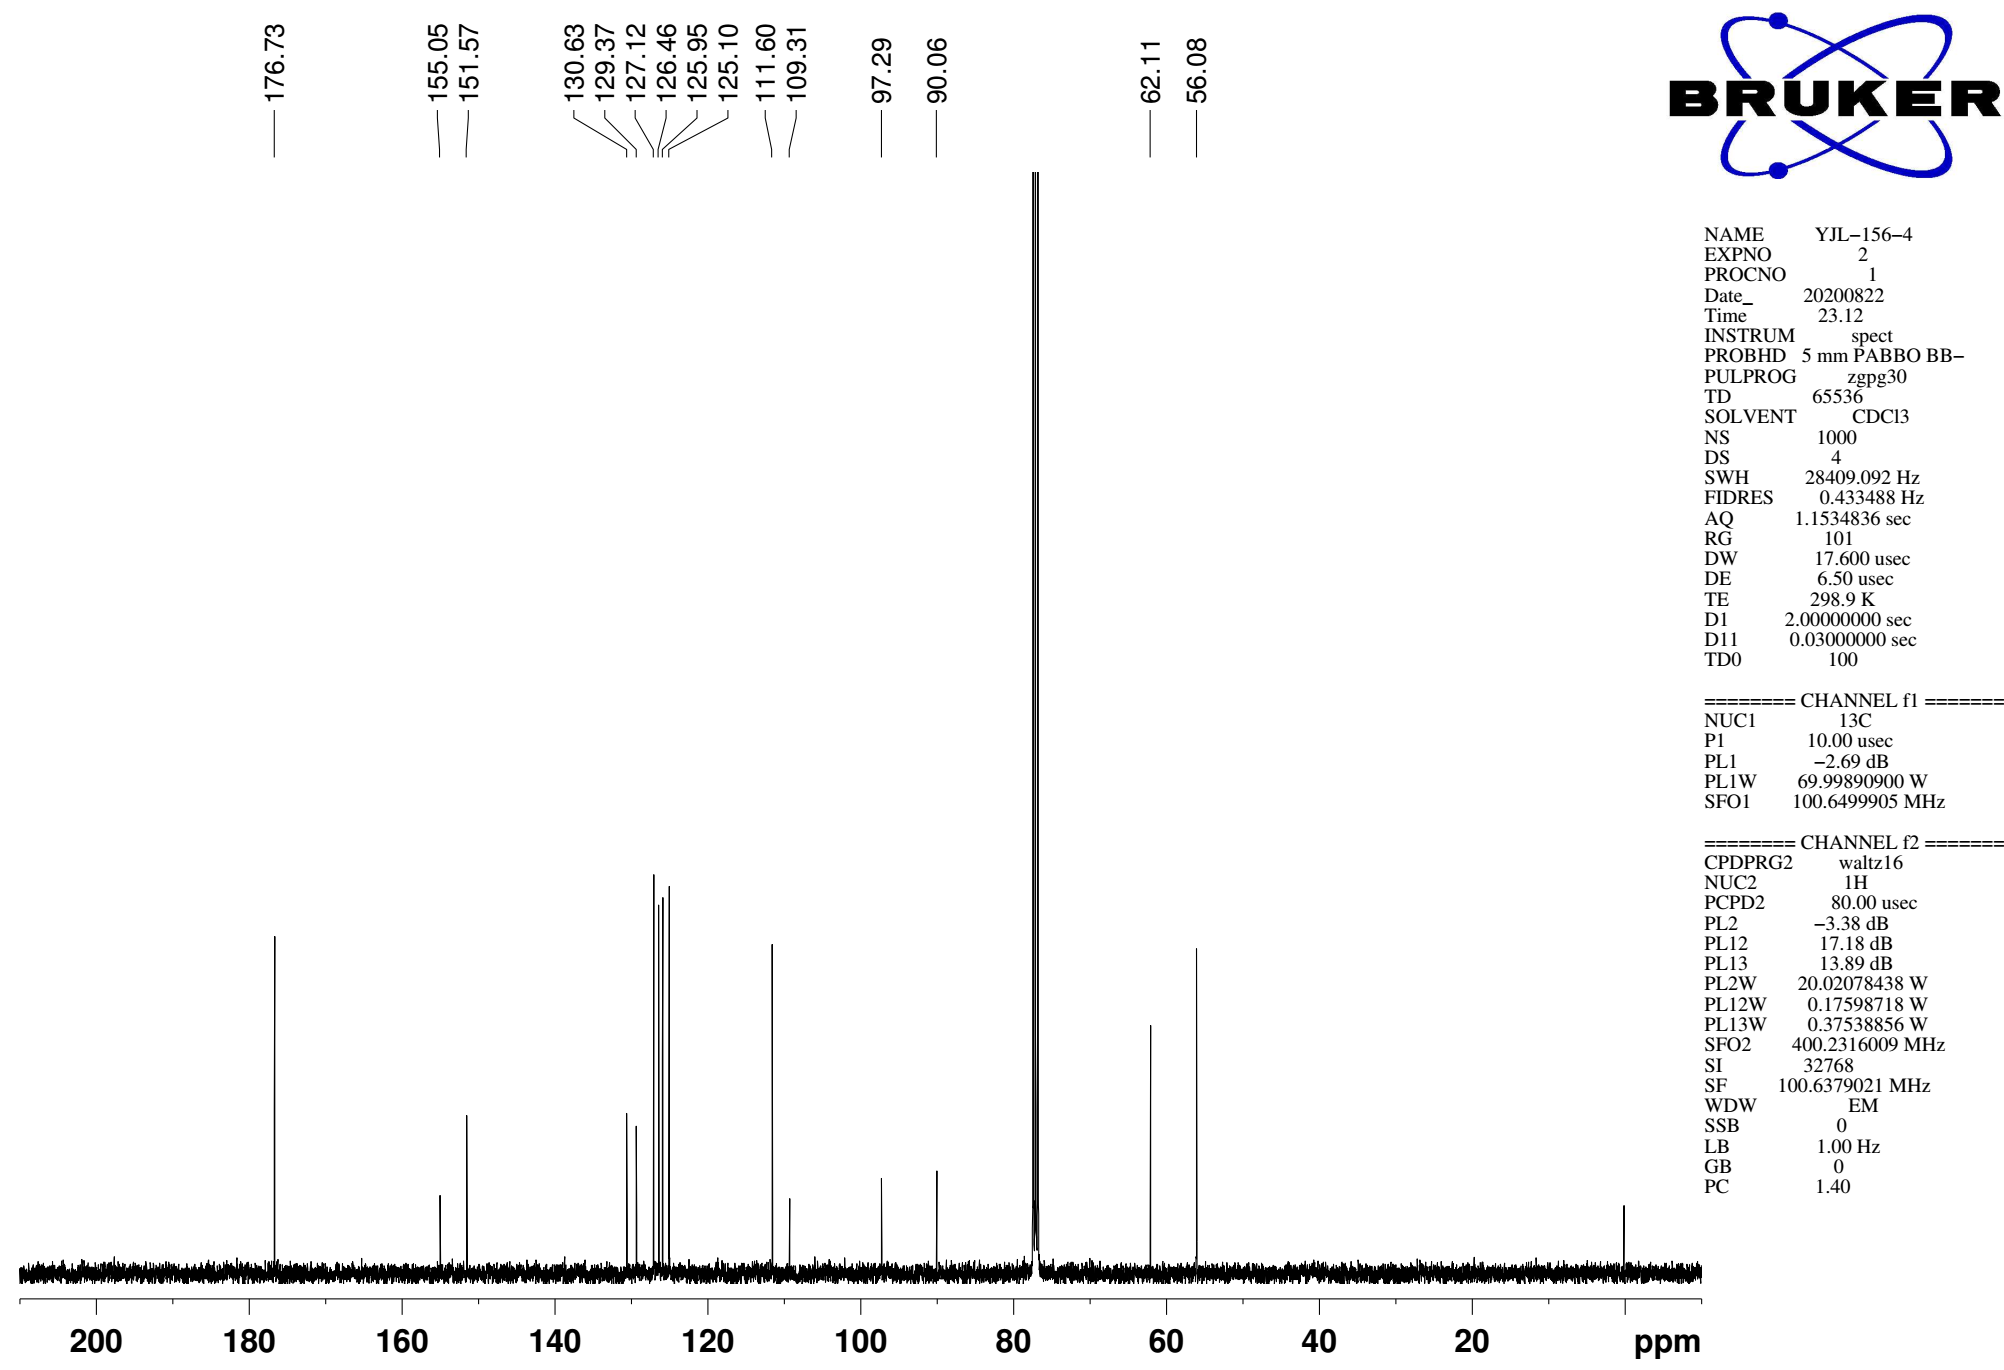


Supplementary Figure 12. 13C NMR (CDCl3, 101MHz) spectra of spectra of substrate 1r


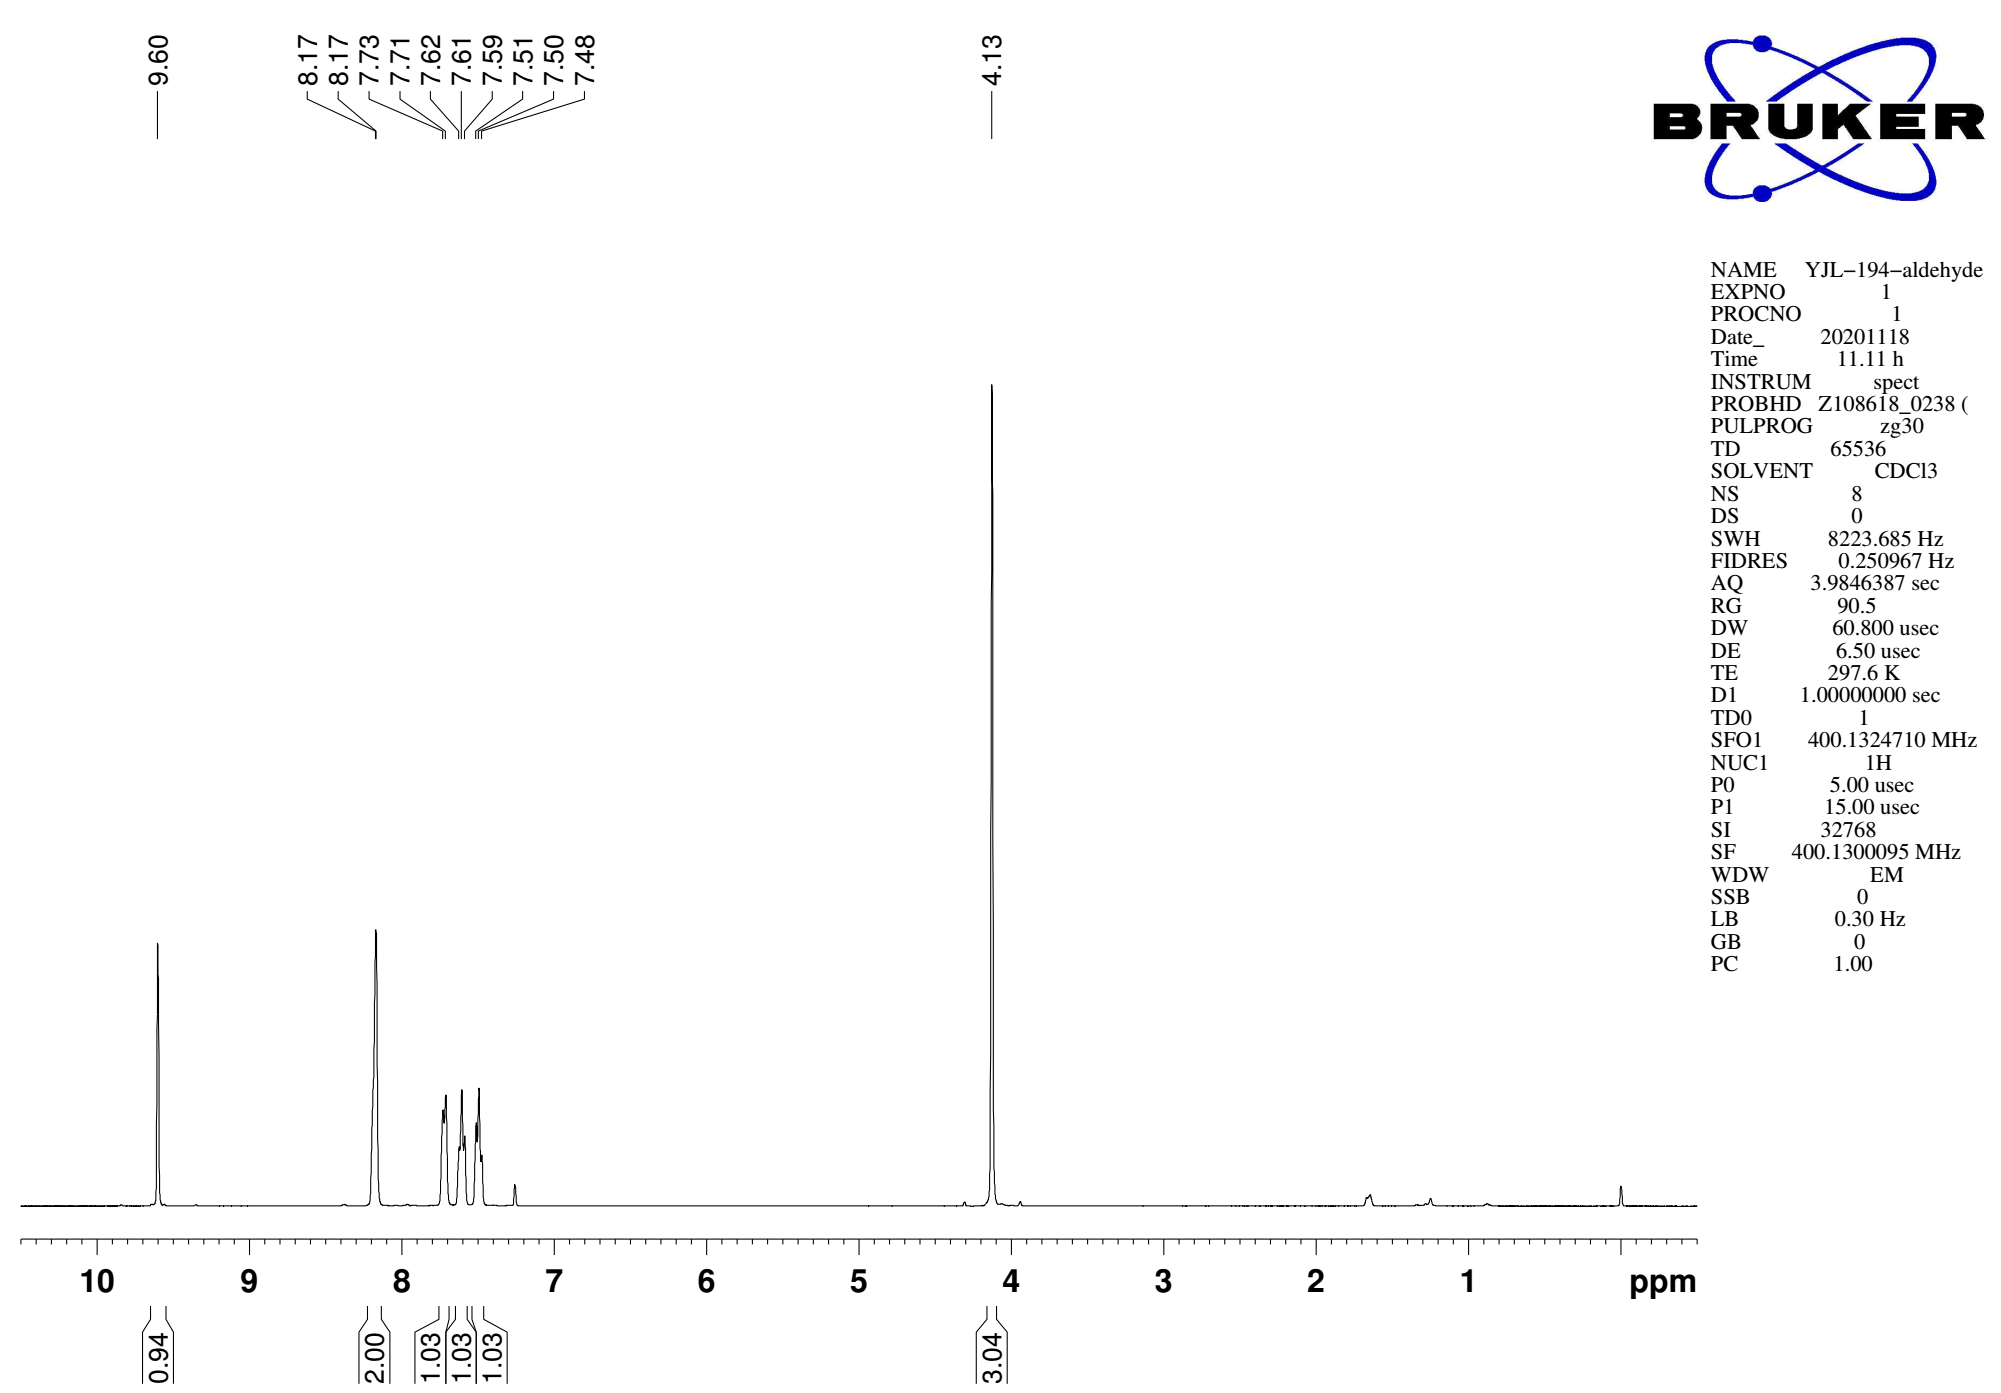


Supplementary Figure 13. 1H NMR (CDCl3, 400MHz) spectra of substrate 1s


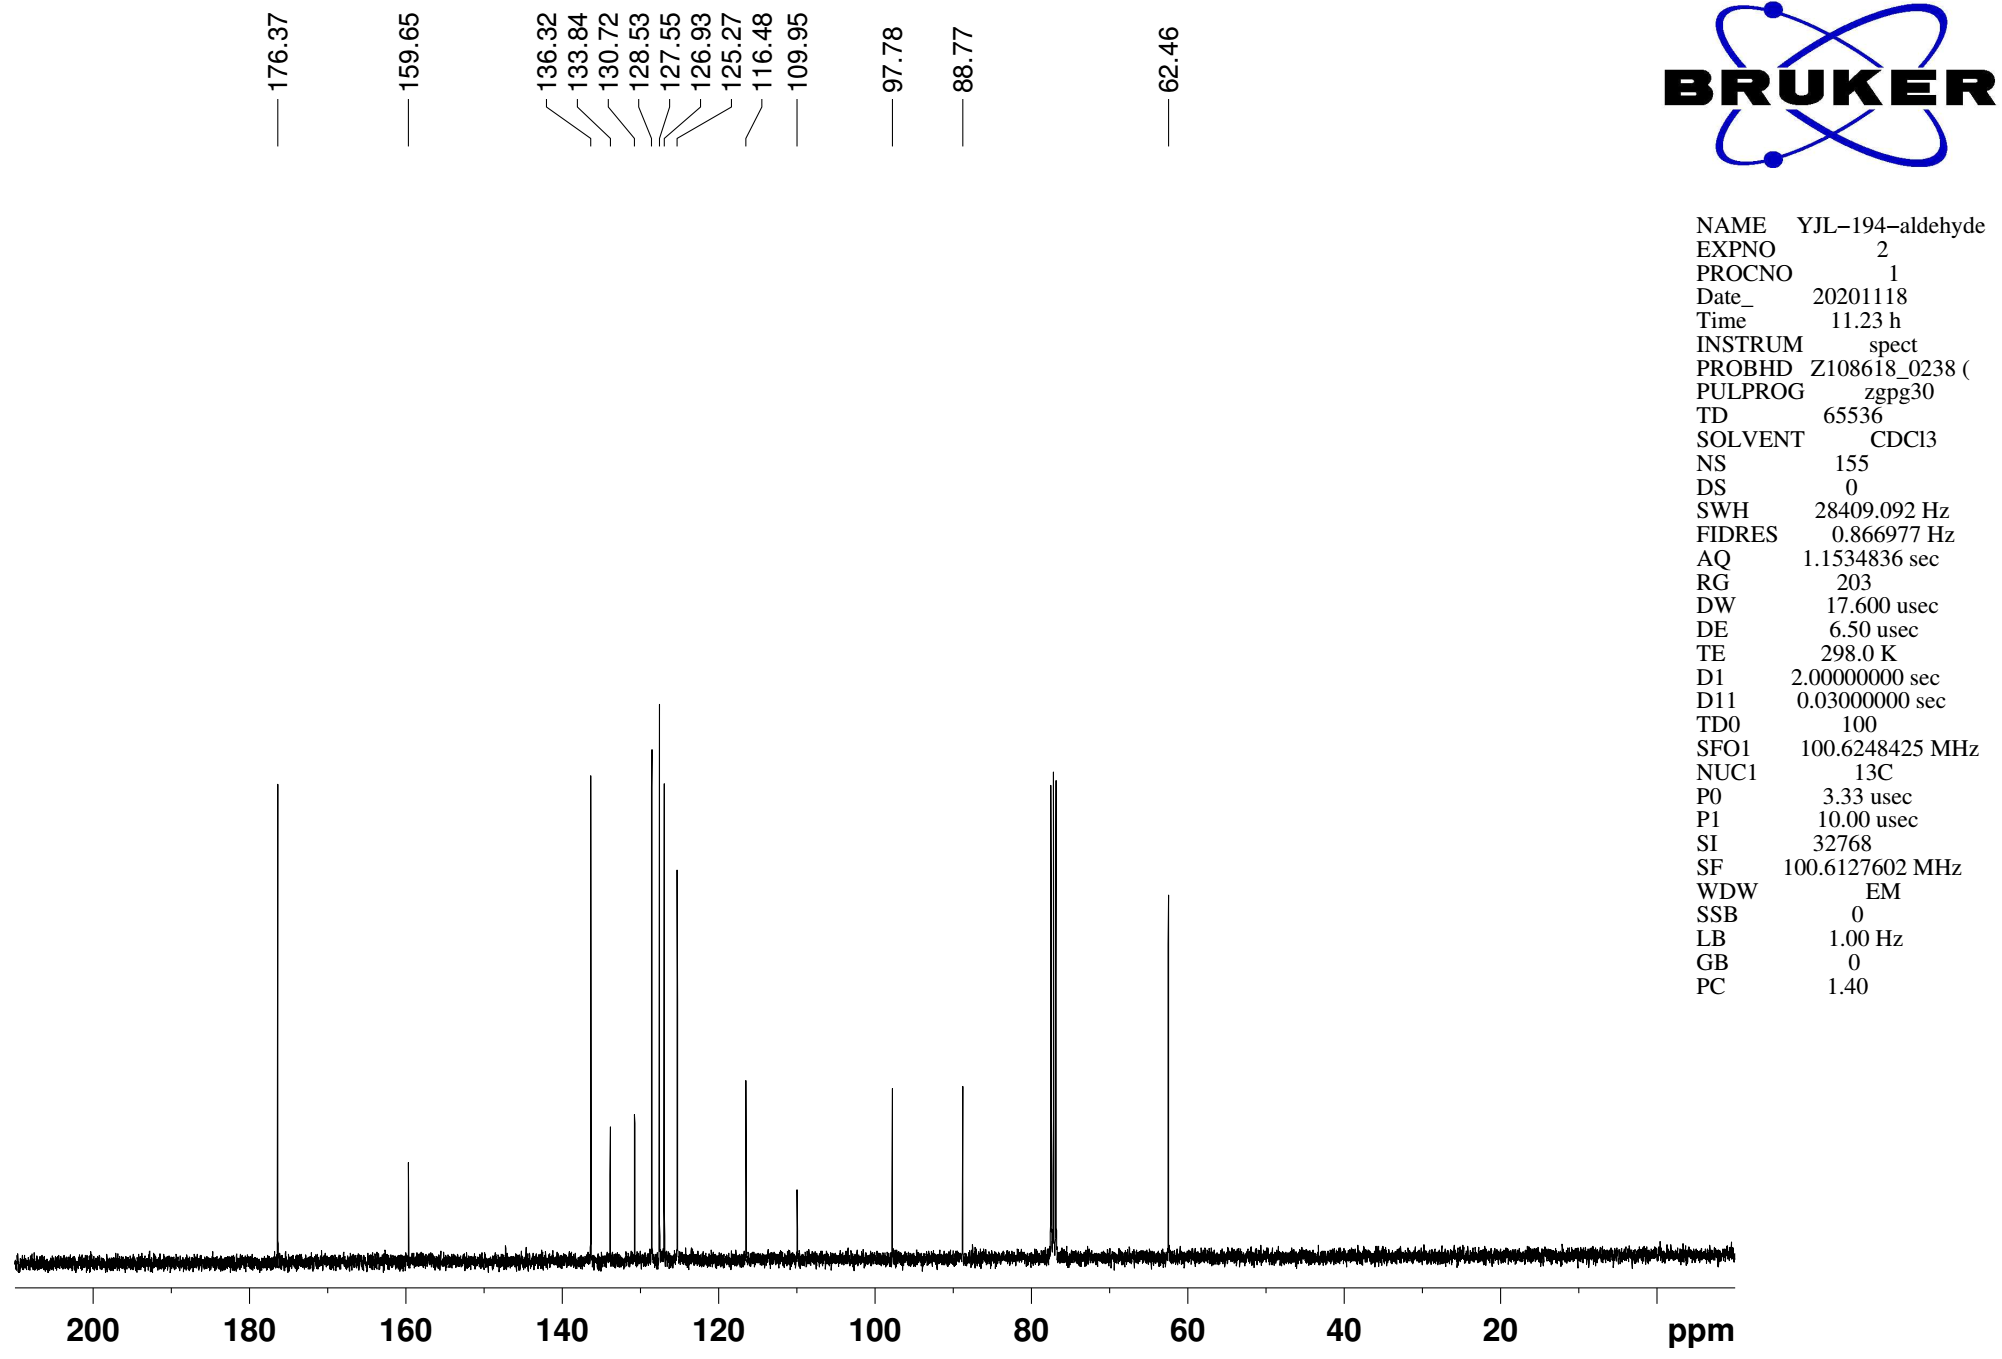


Supplementary Figure 14. 13C NMR (CDCl3, 101MHz) spectra of spectra of substrate 1s


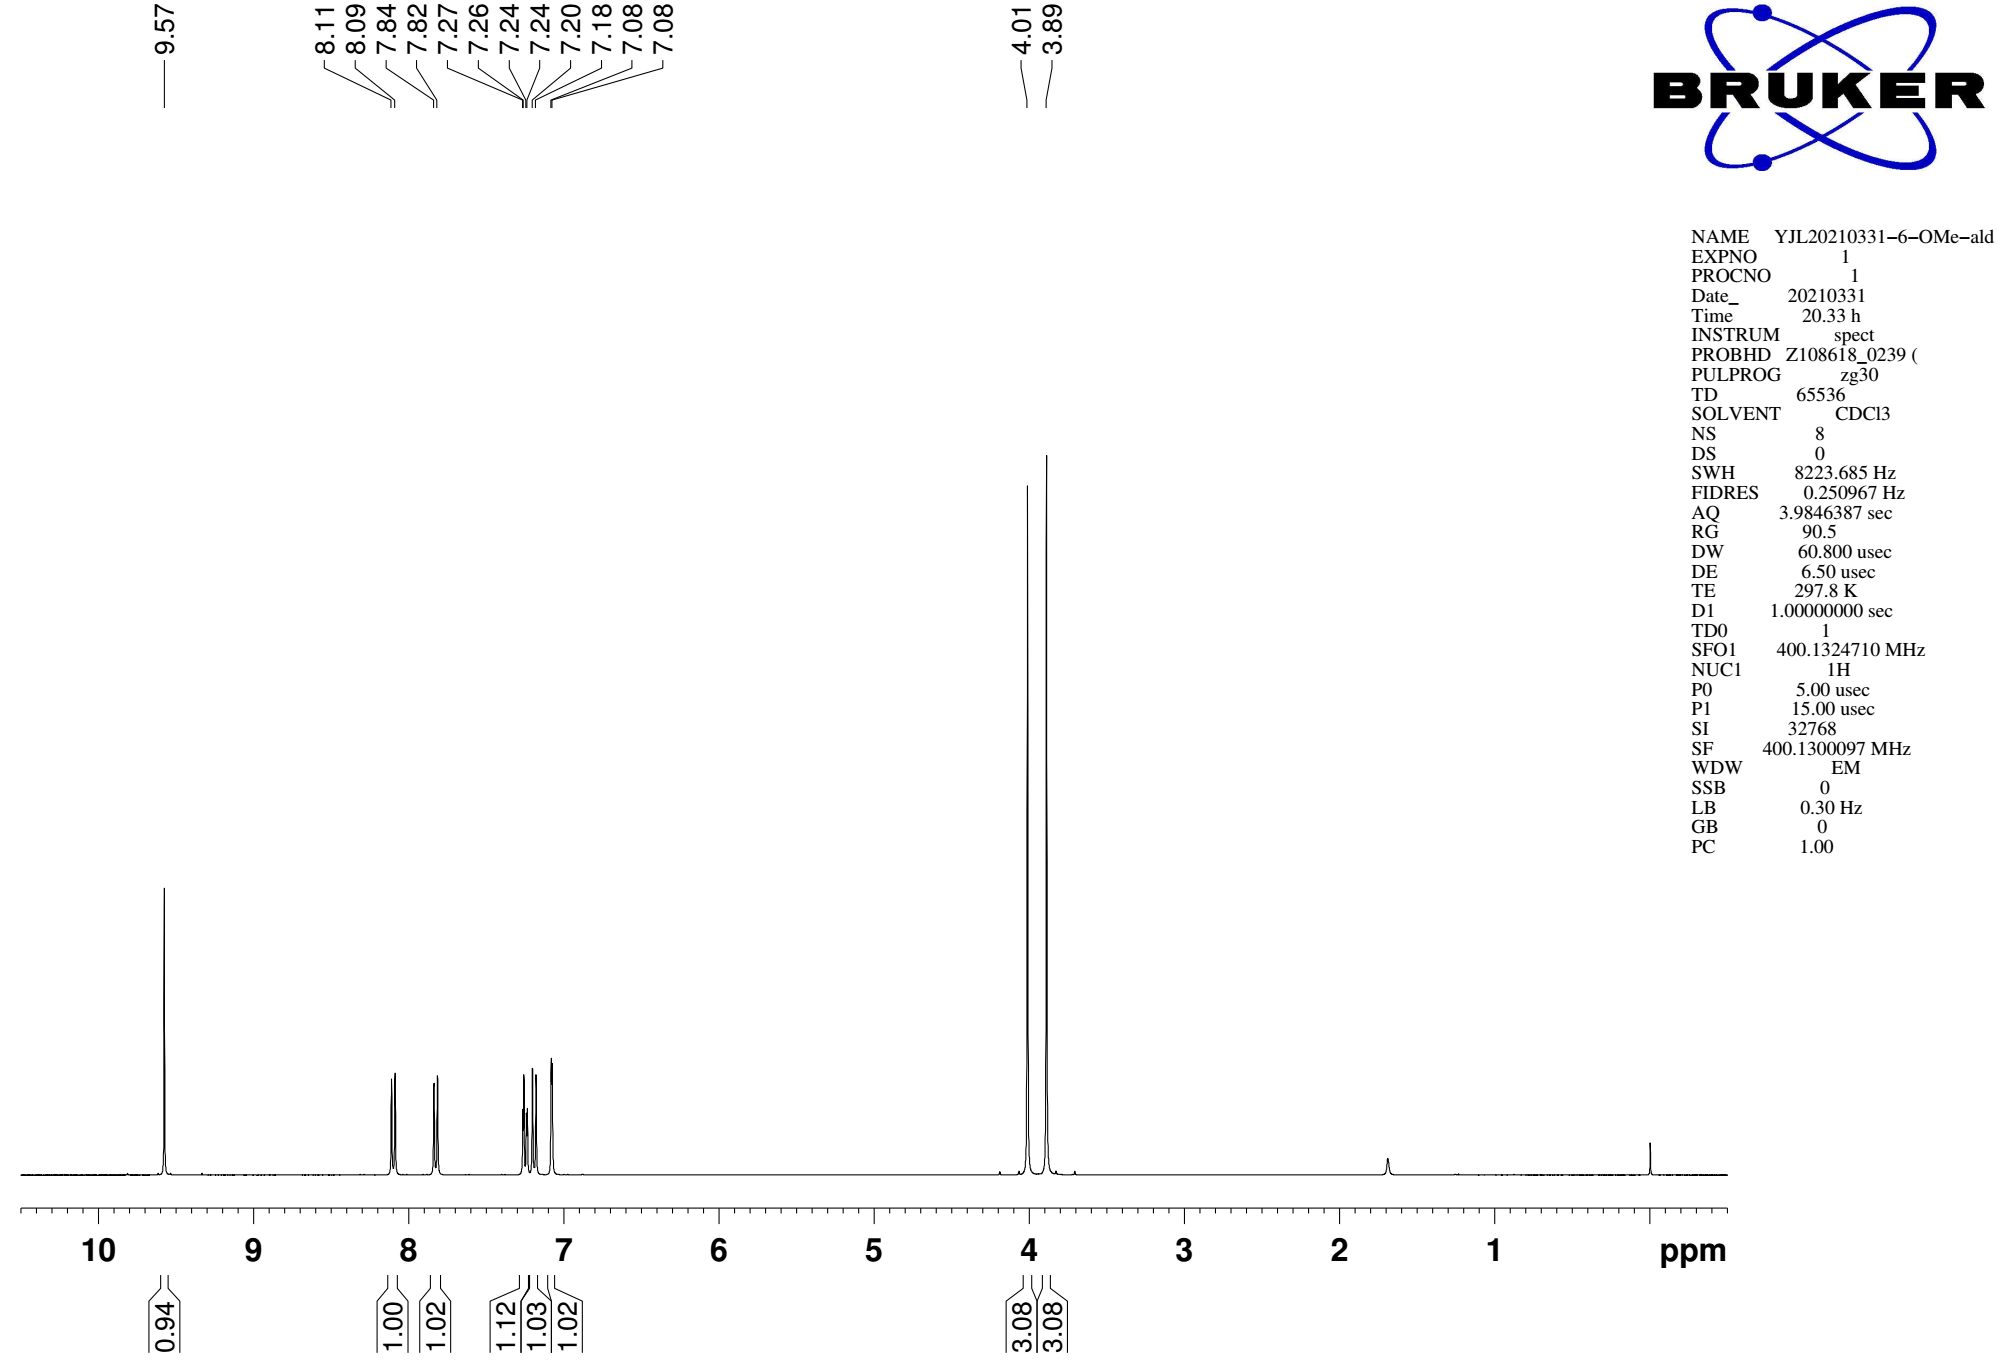


Supplementary Figure 15. 1H NMR (CDCl3, 400MHz) spectra of substrate 1t

13C NMR (CDCl3, 101MHz)


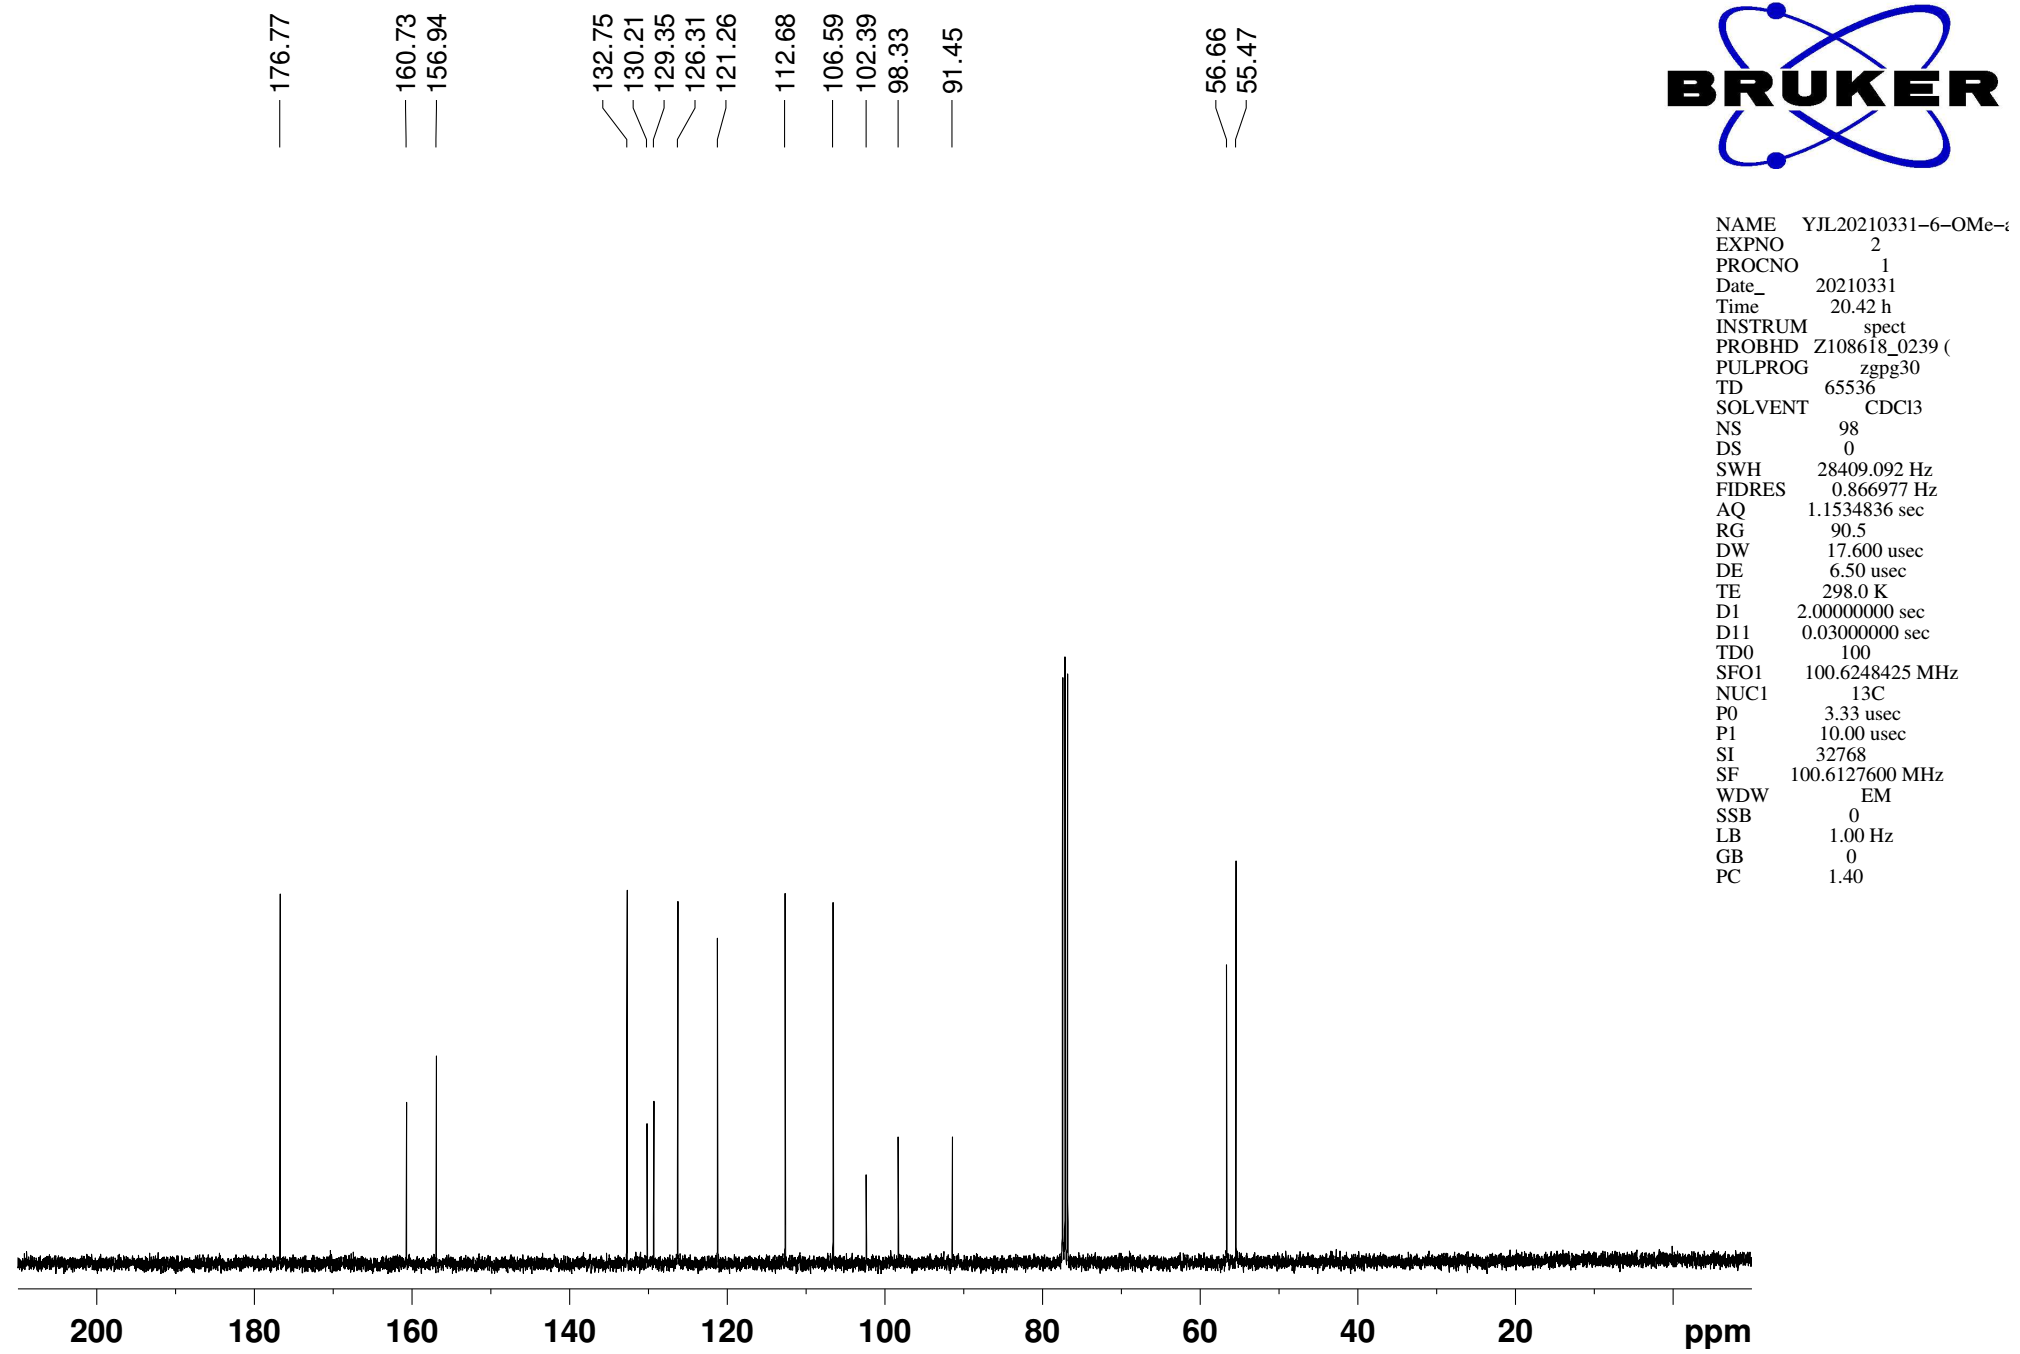


Supplementary Figure 16. 13C NMR (CDCl3, 101MHz) spectra of spectra of substrate 1t


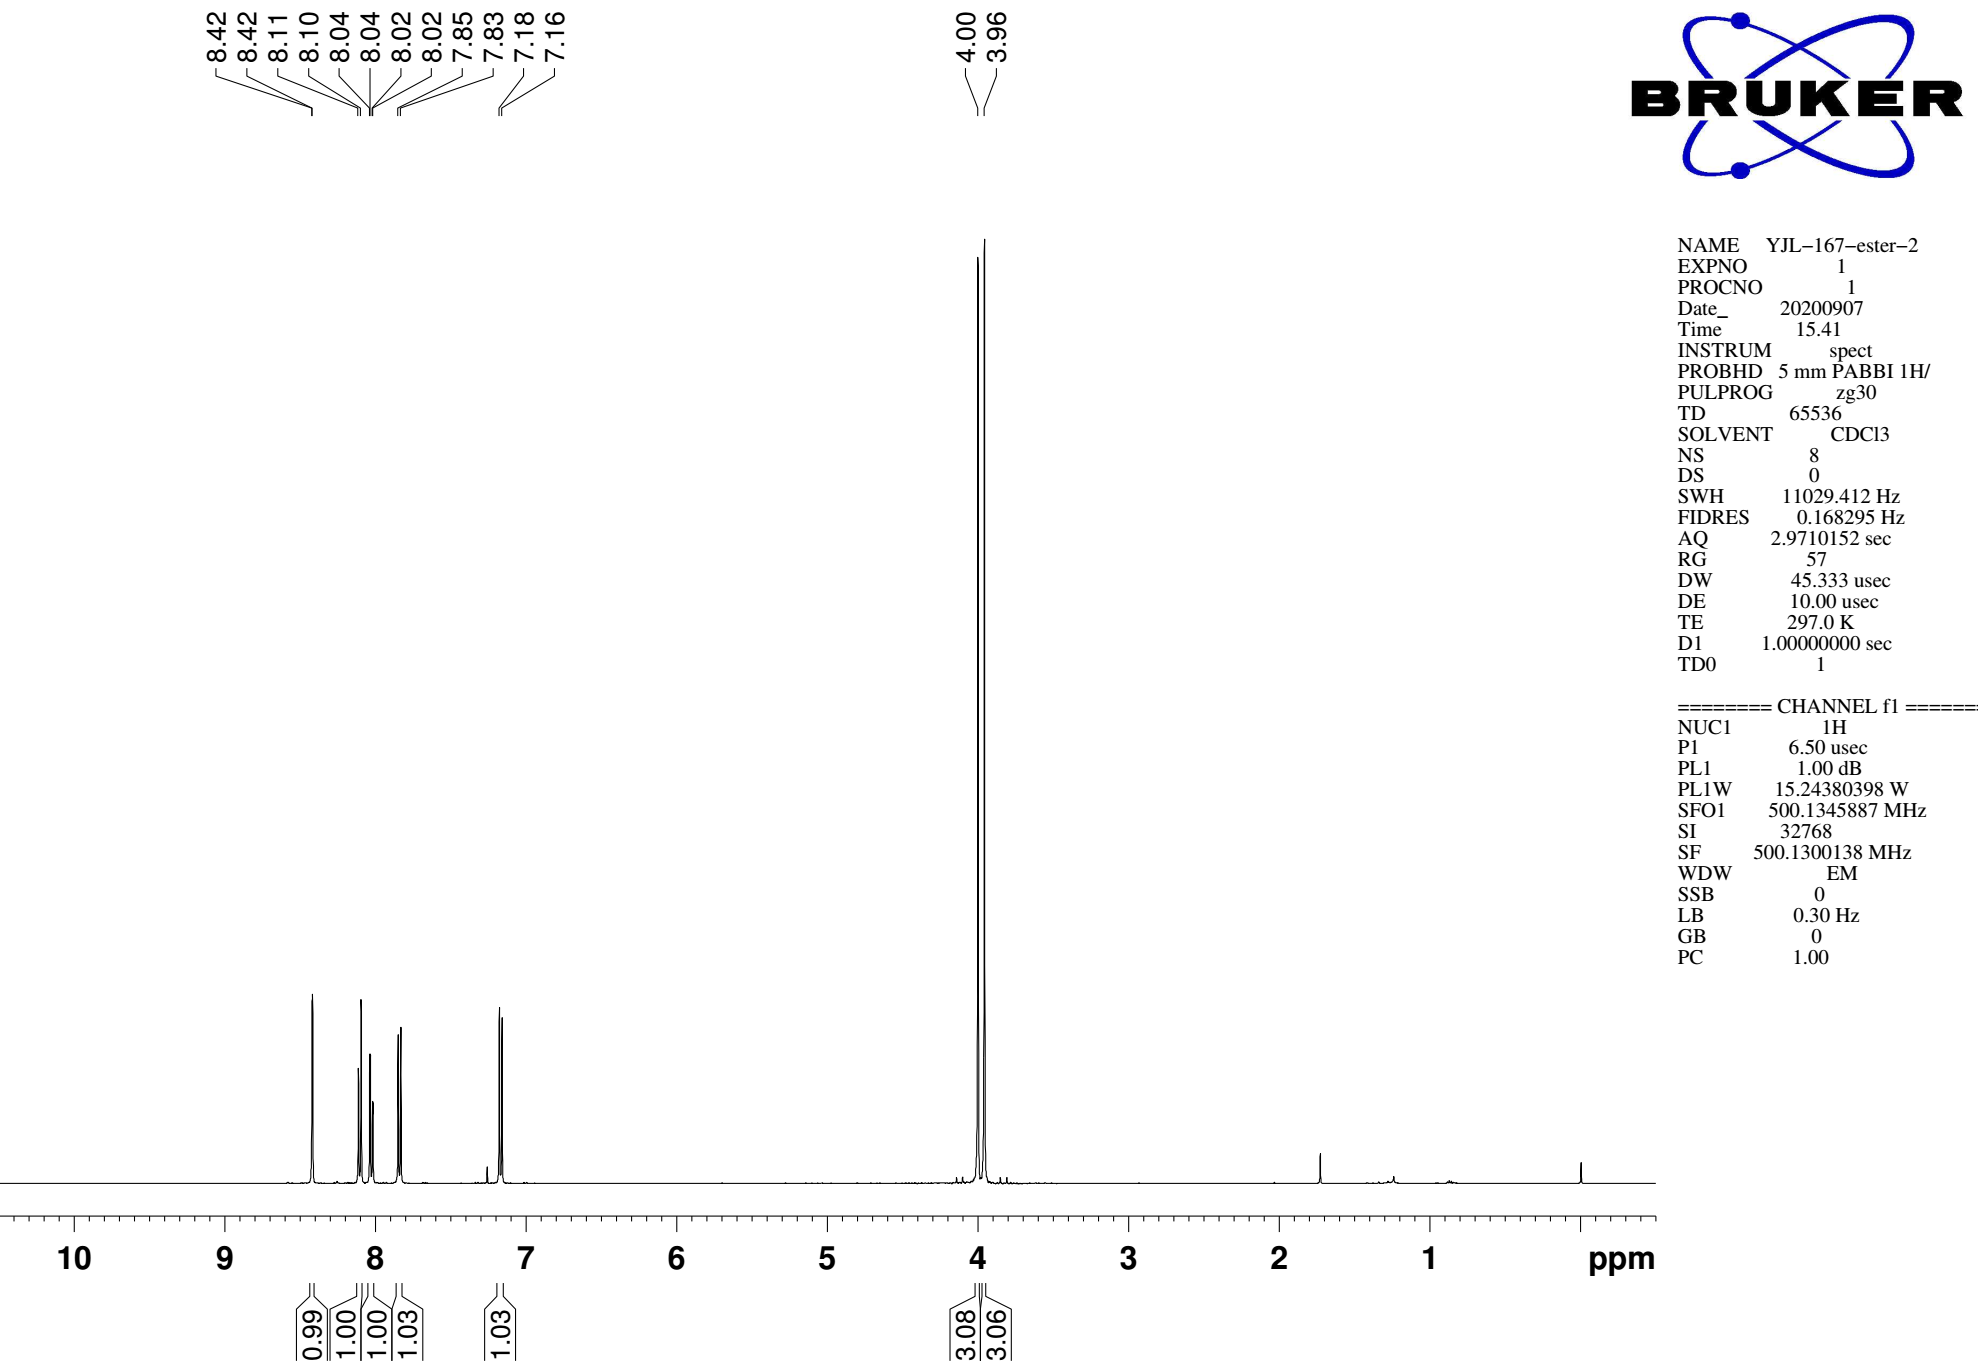


Supplementary Figure 17. 1H NMR (CDCl3, 500MHz) spectra of S14


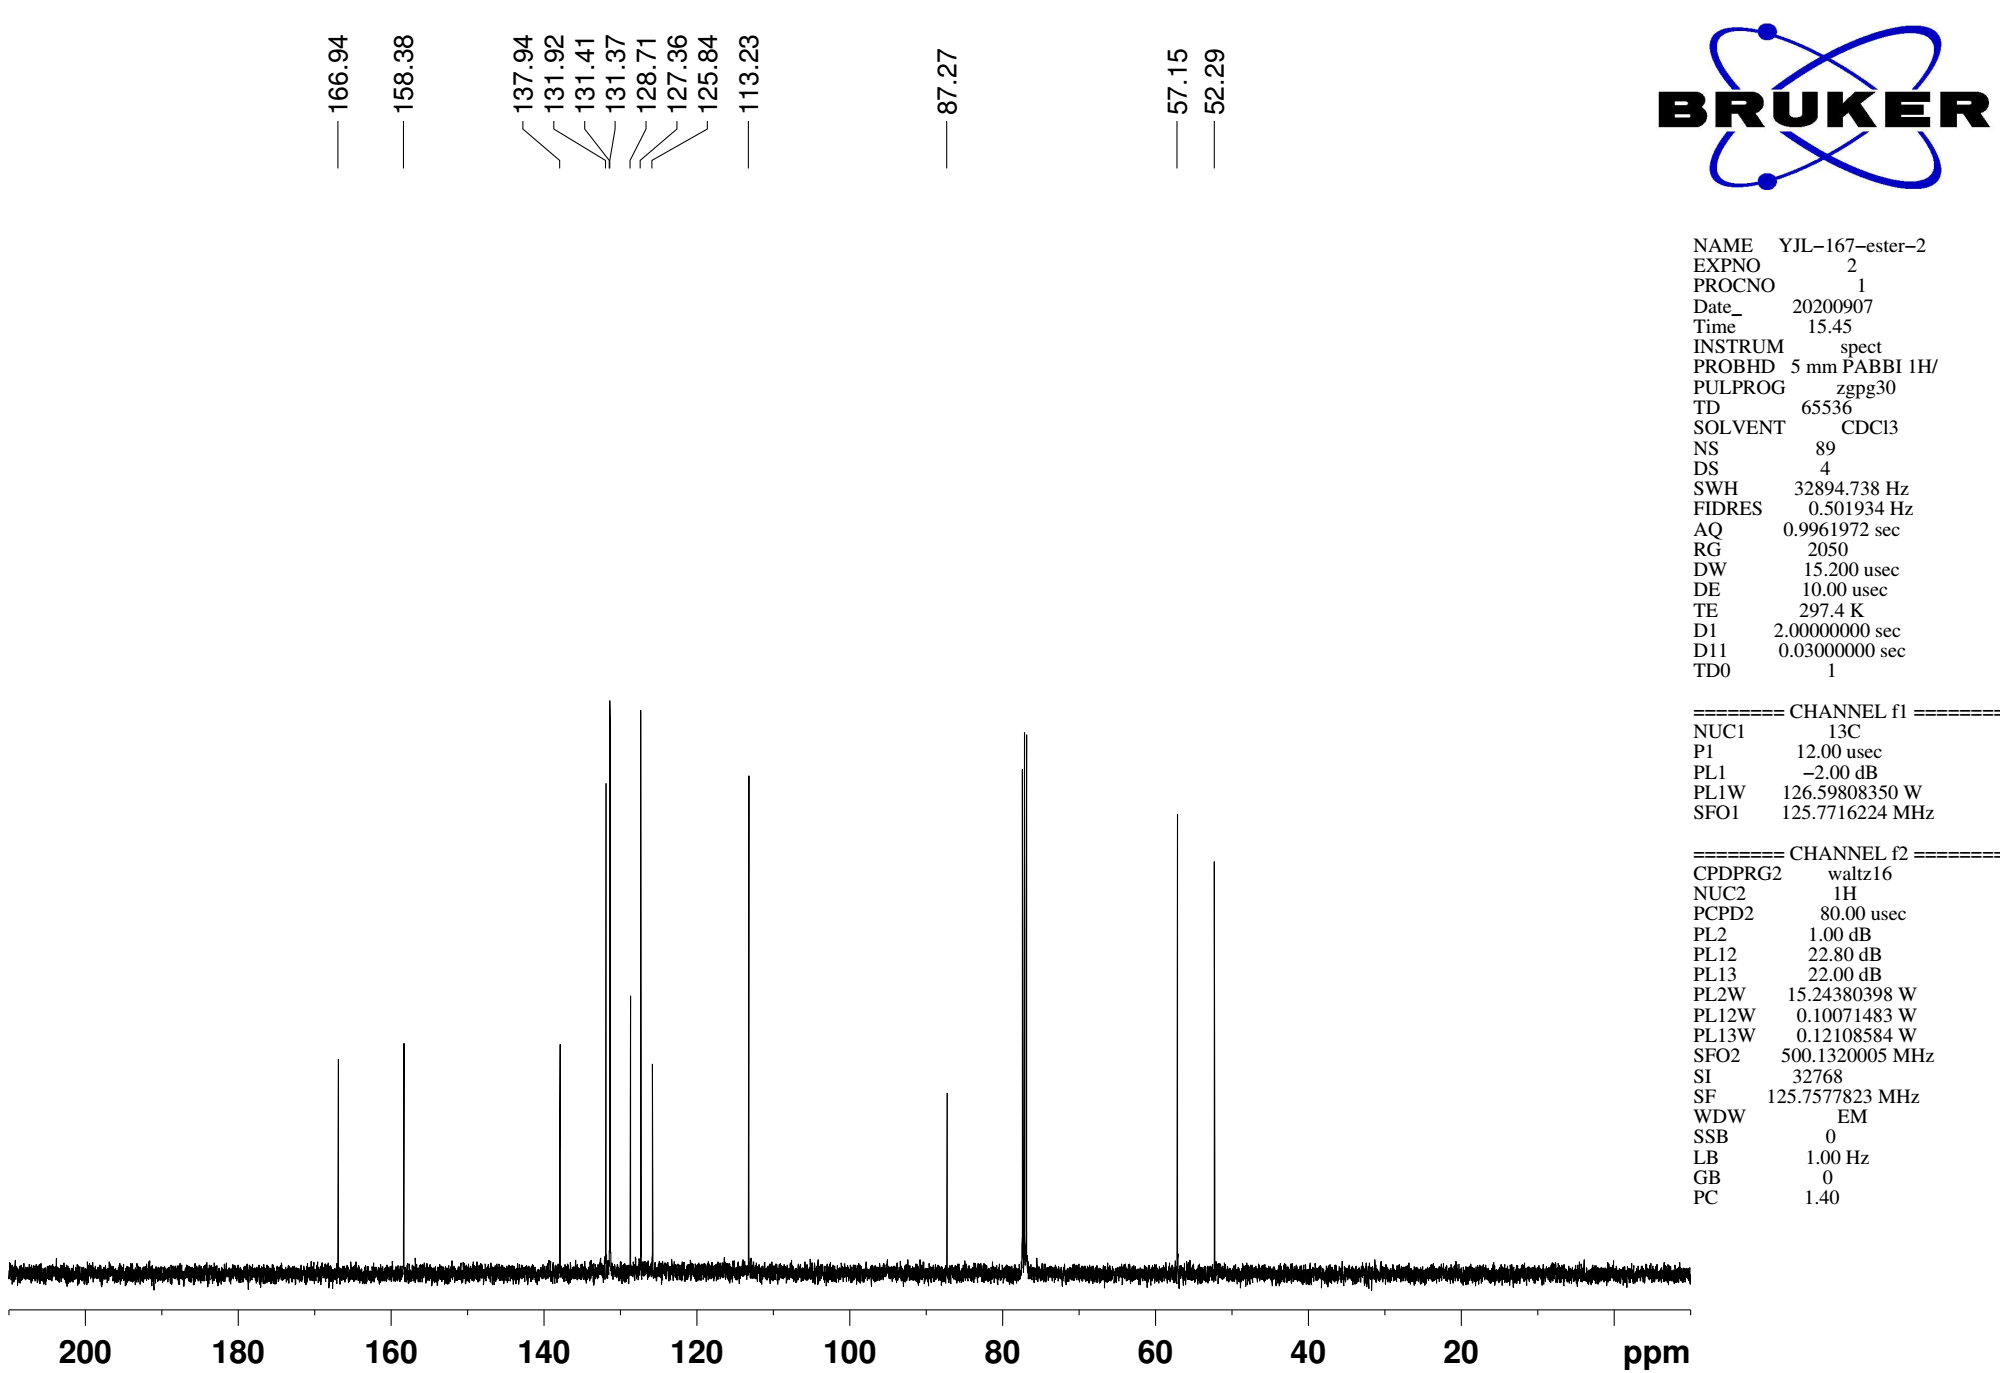


Supplementary Figure 18. 13C NMR (CDCl3, 126MHz) spectra of spectra of S14


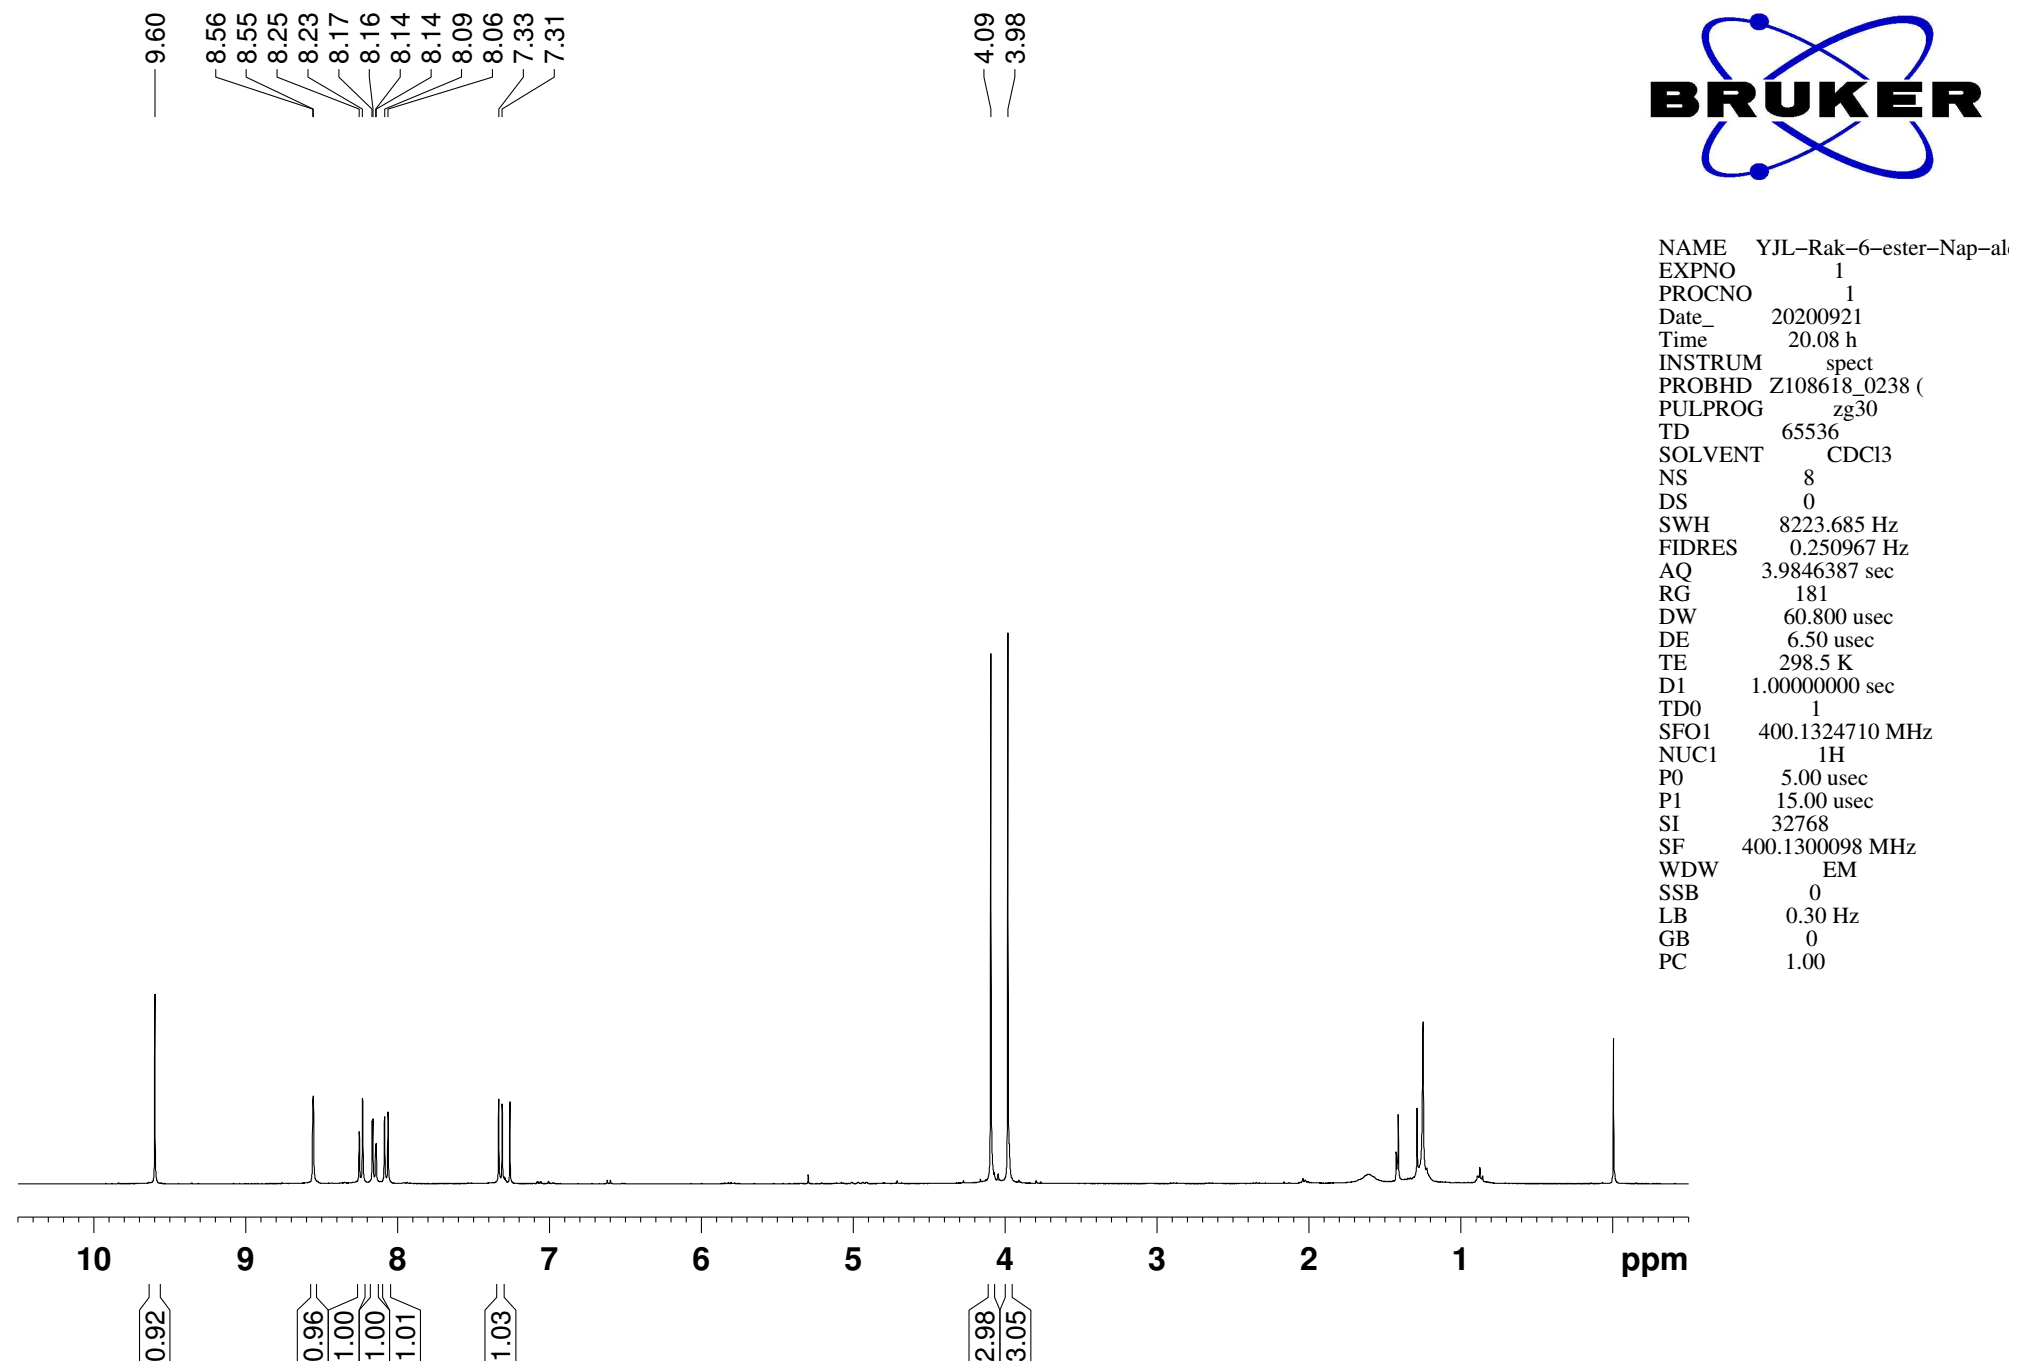


Supplementary Figure 19. 1H NMR (CDCl3, 400MHz) spectra of substrate 1y


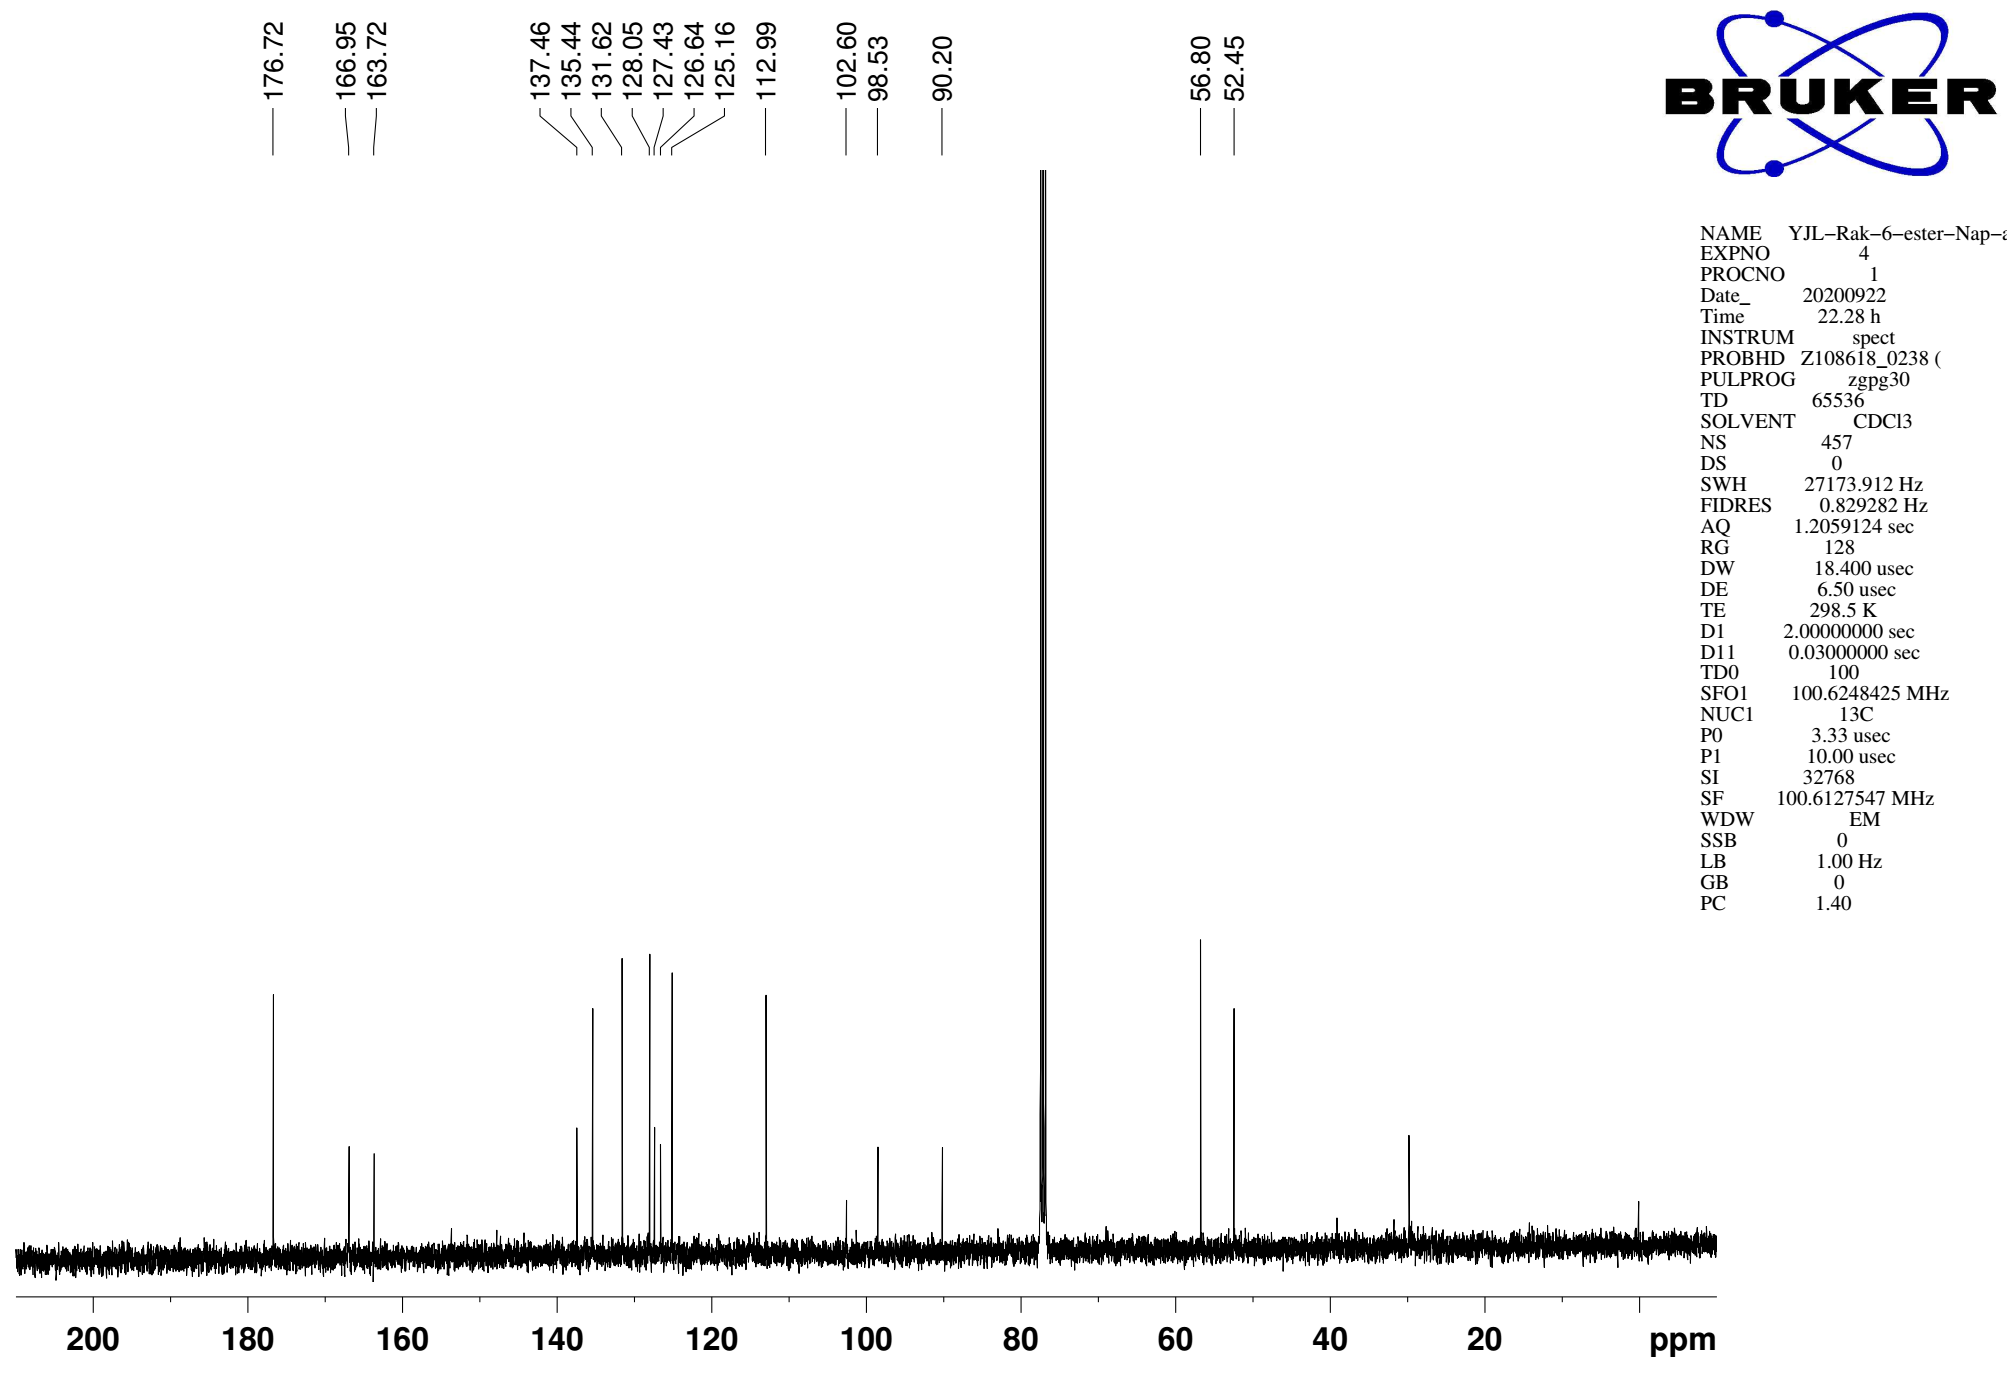


Supplementary Figure 20. 13C NMR (CDCl3, 101MHz) spectra of spectra of substrate 1y


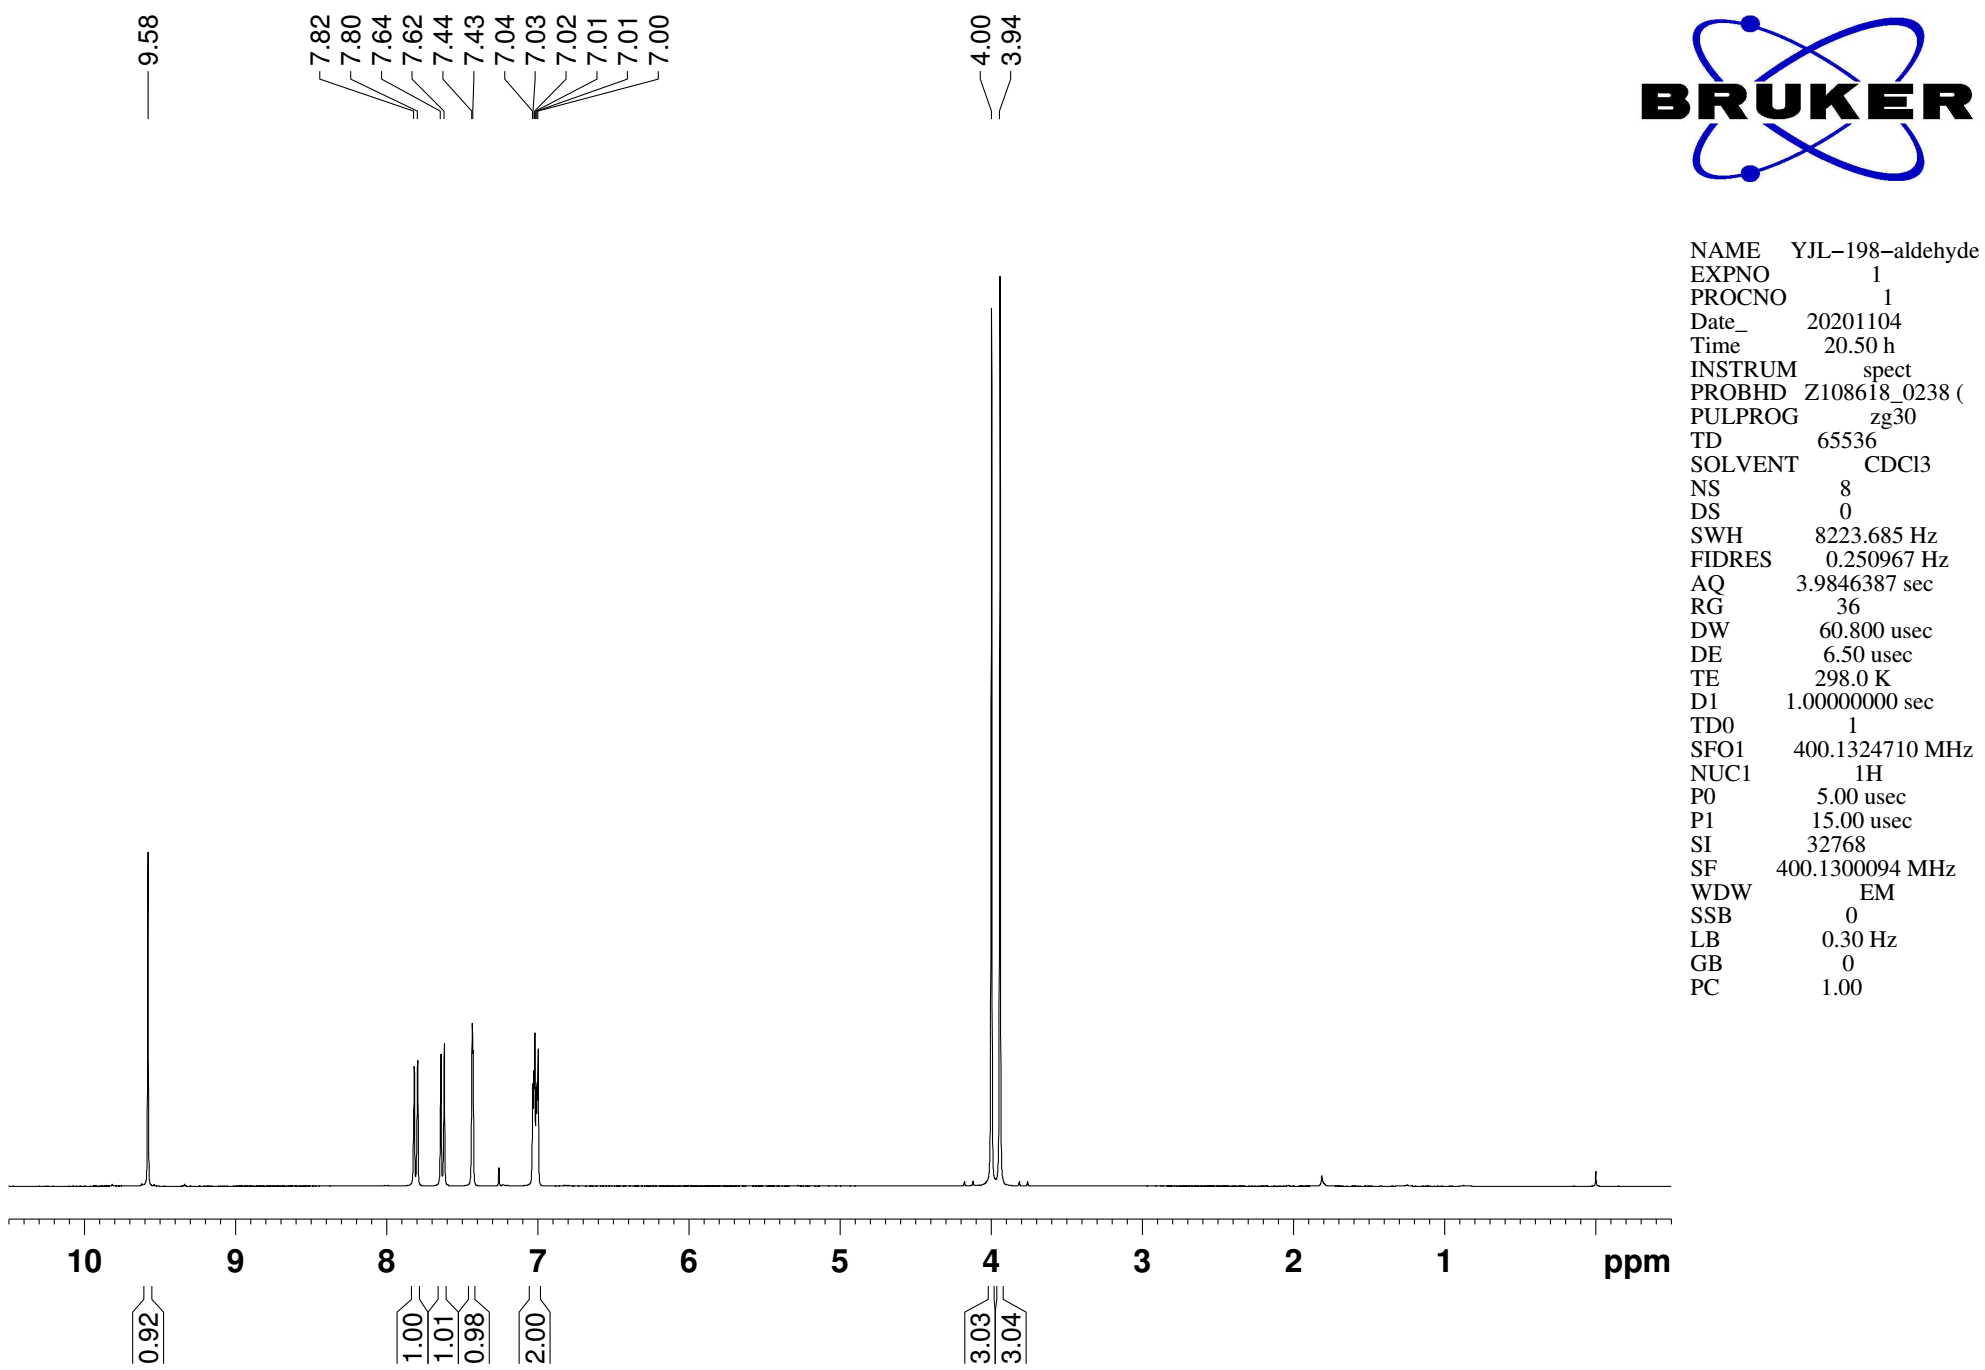


Supplementary Figure 21. 1H NMR (CDCl3, 400MHz) spectra of substrate 1z


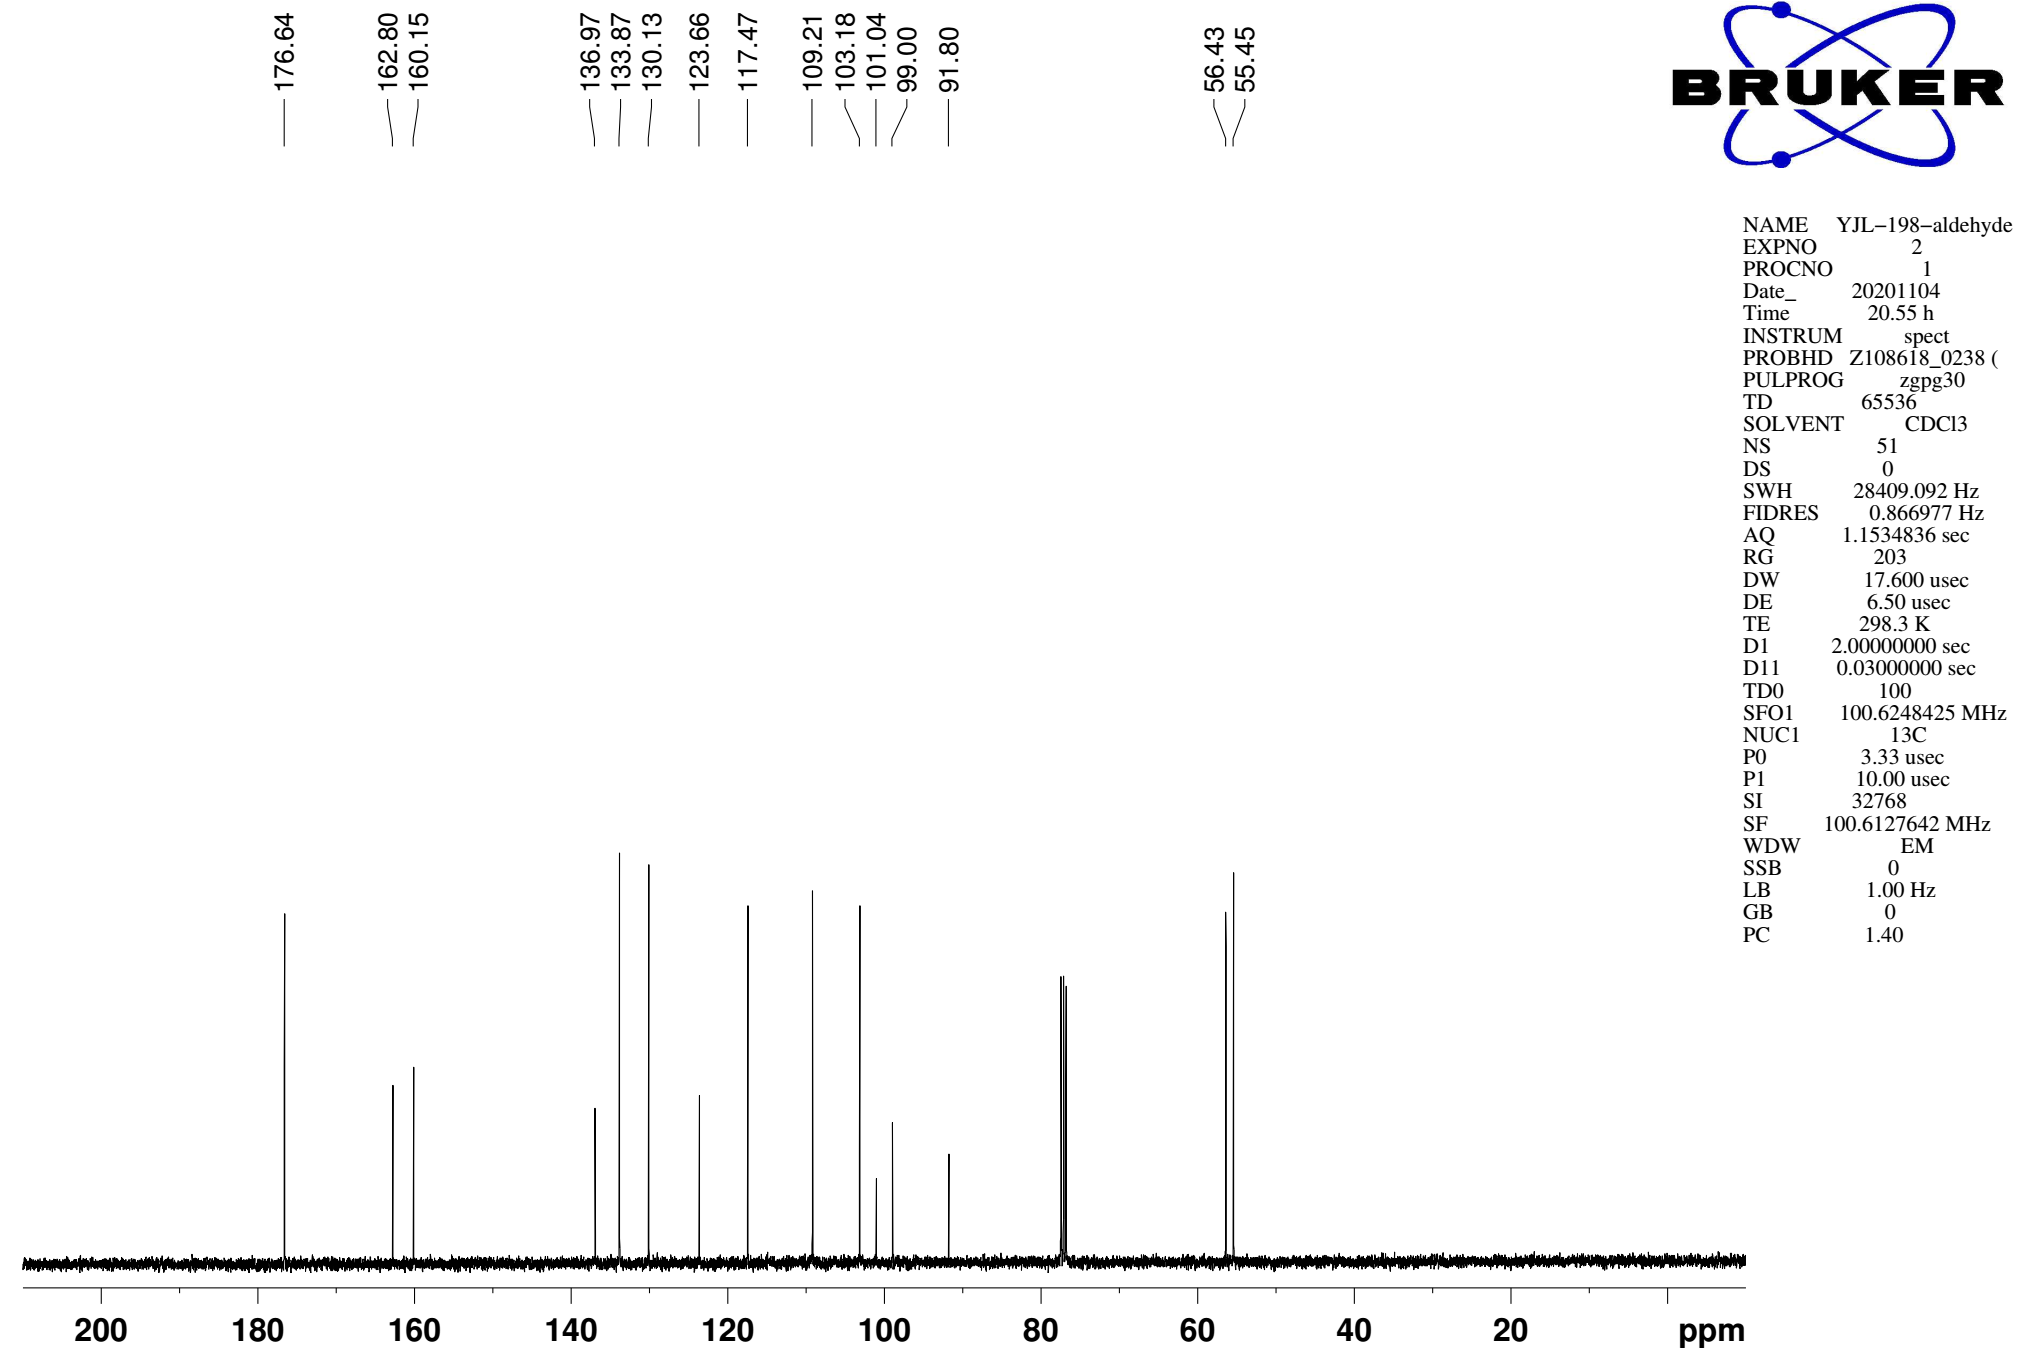


Supplementary Figure 22. 13C NMR (CDCl3, 101MHz) spectra of spectra of substrate 1z


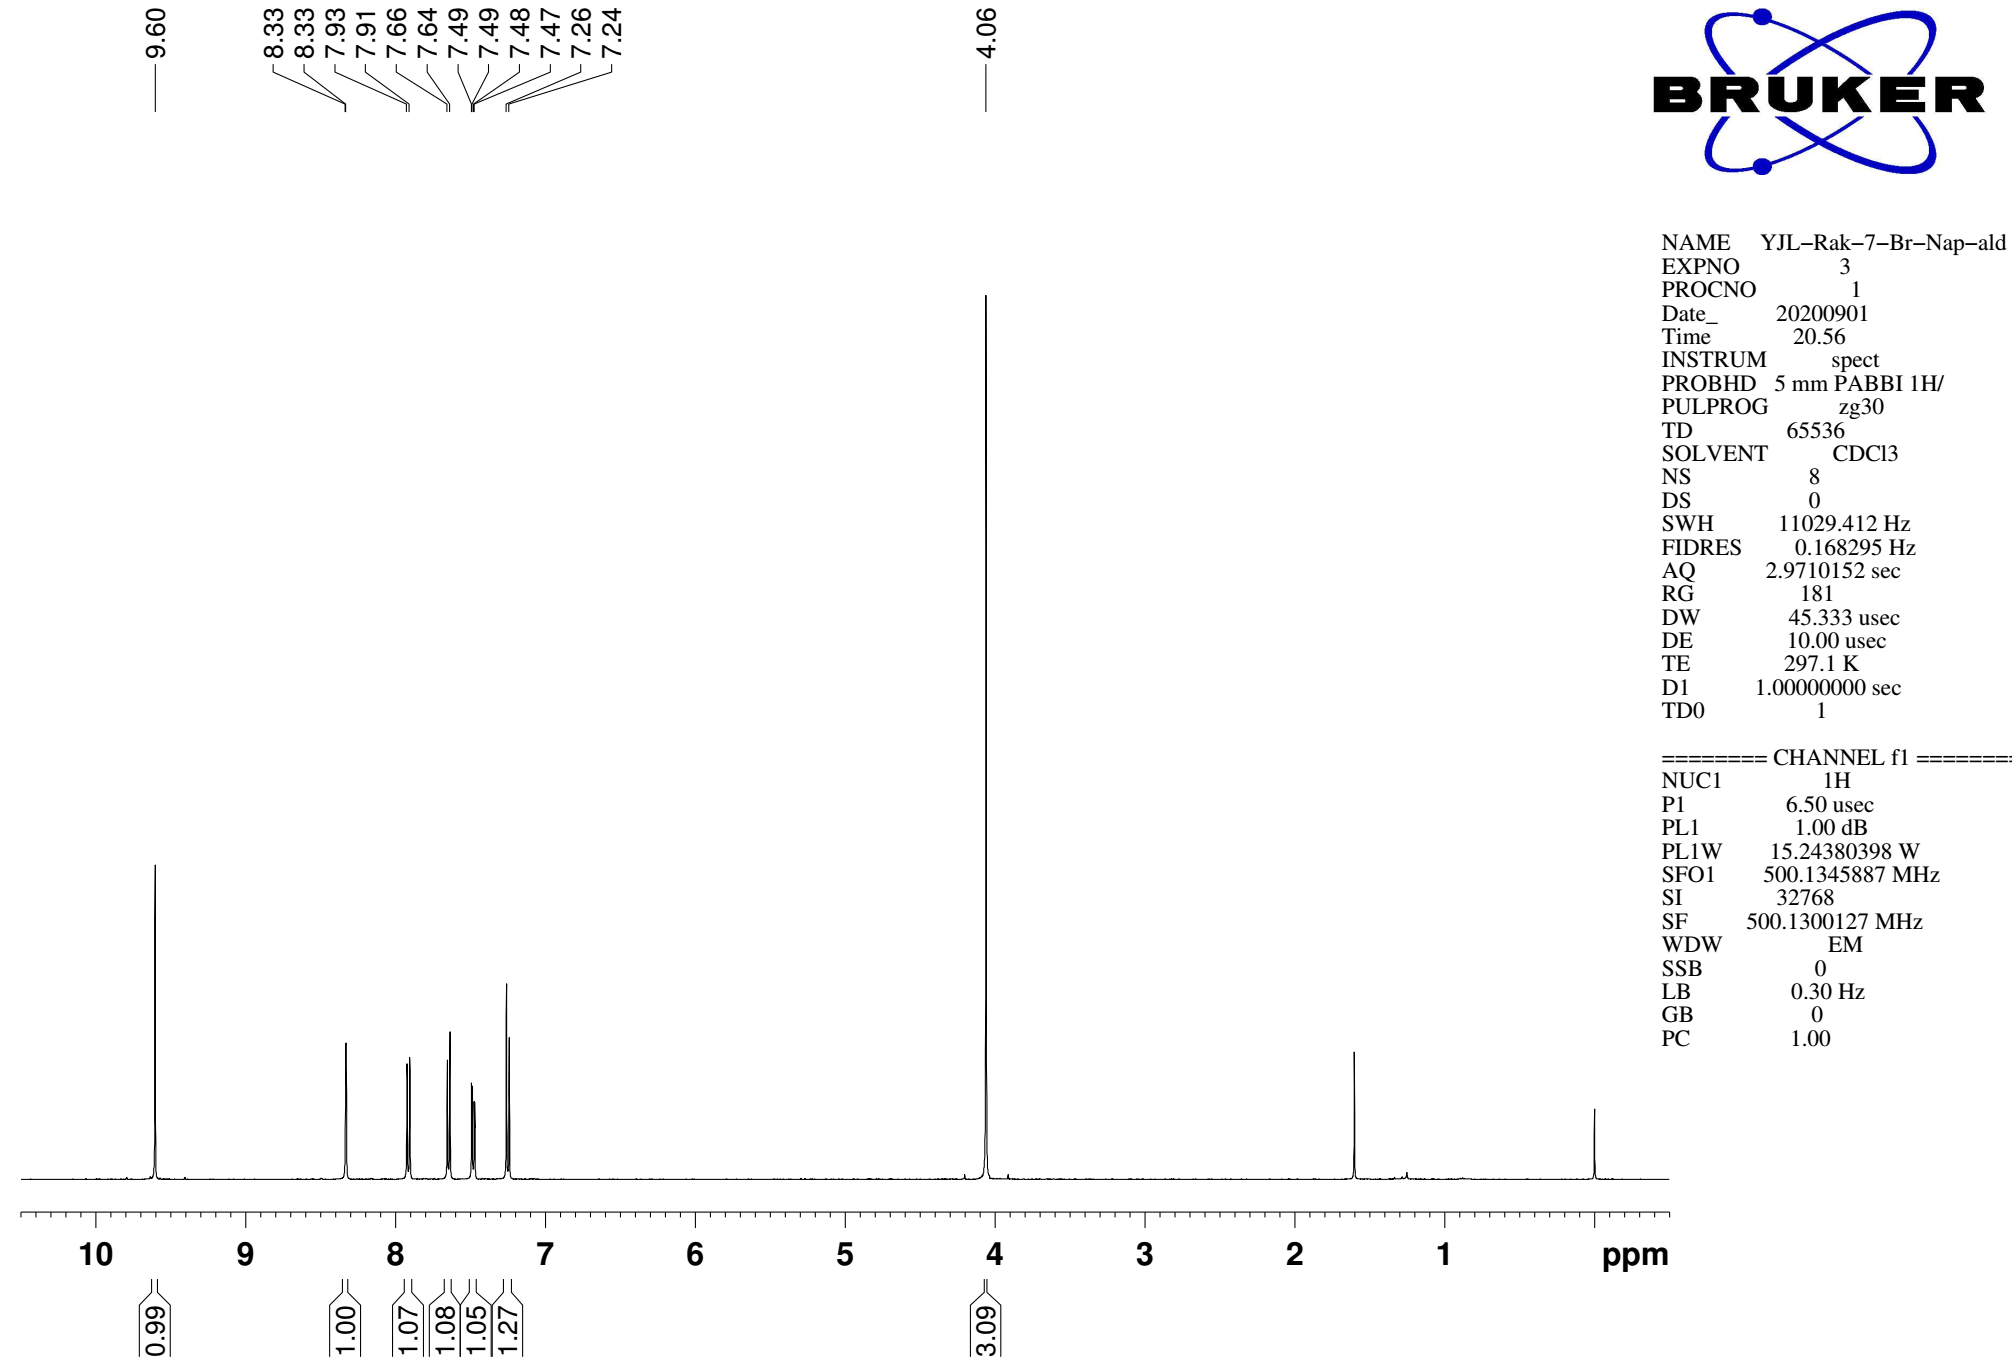


Supplementary Figure 23. 1H NMR (CDCl3, 500MHz) spectra of substrate 1aa

13C NMR (CDCl3, 126MHz)


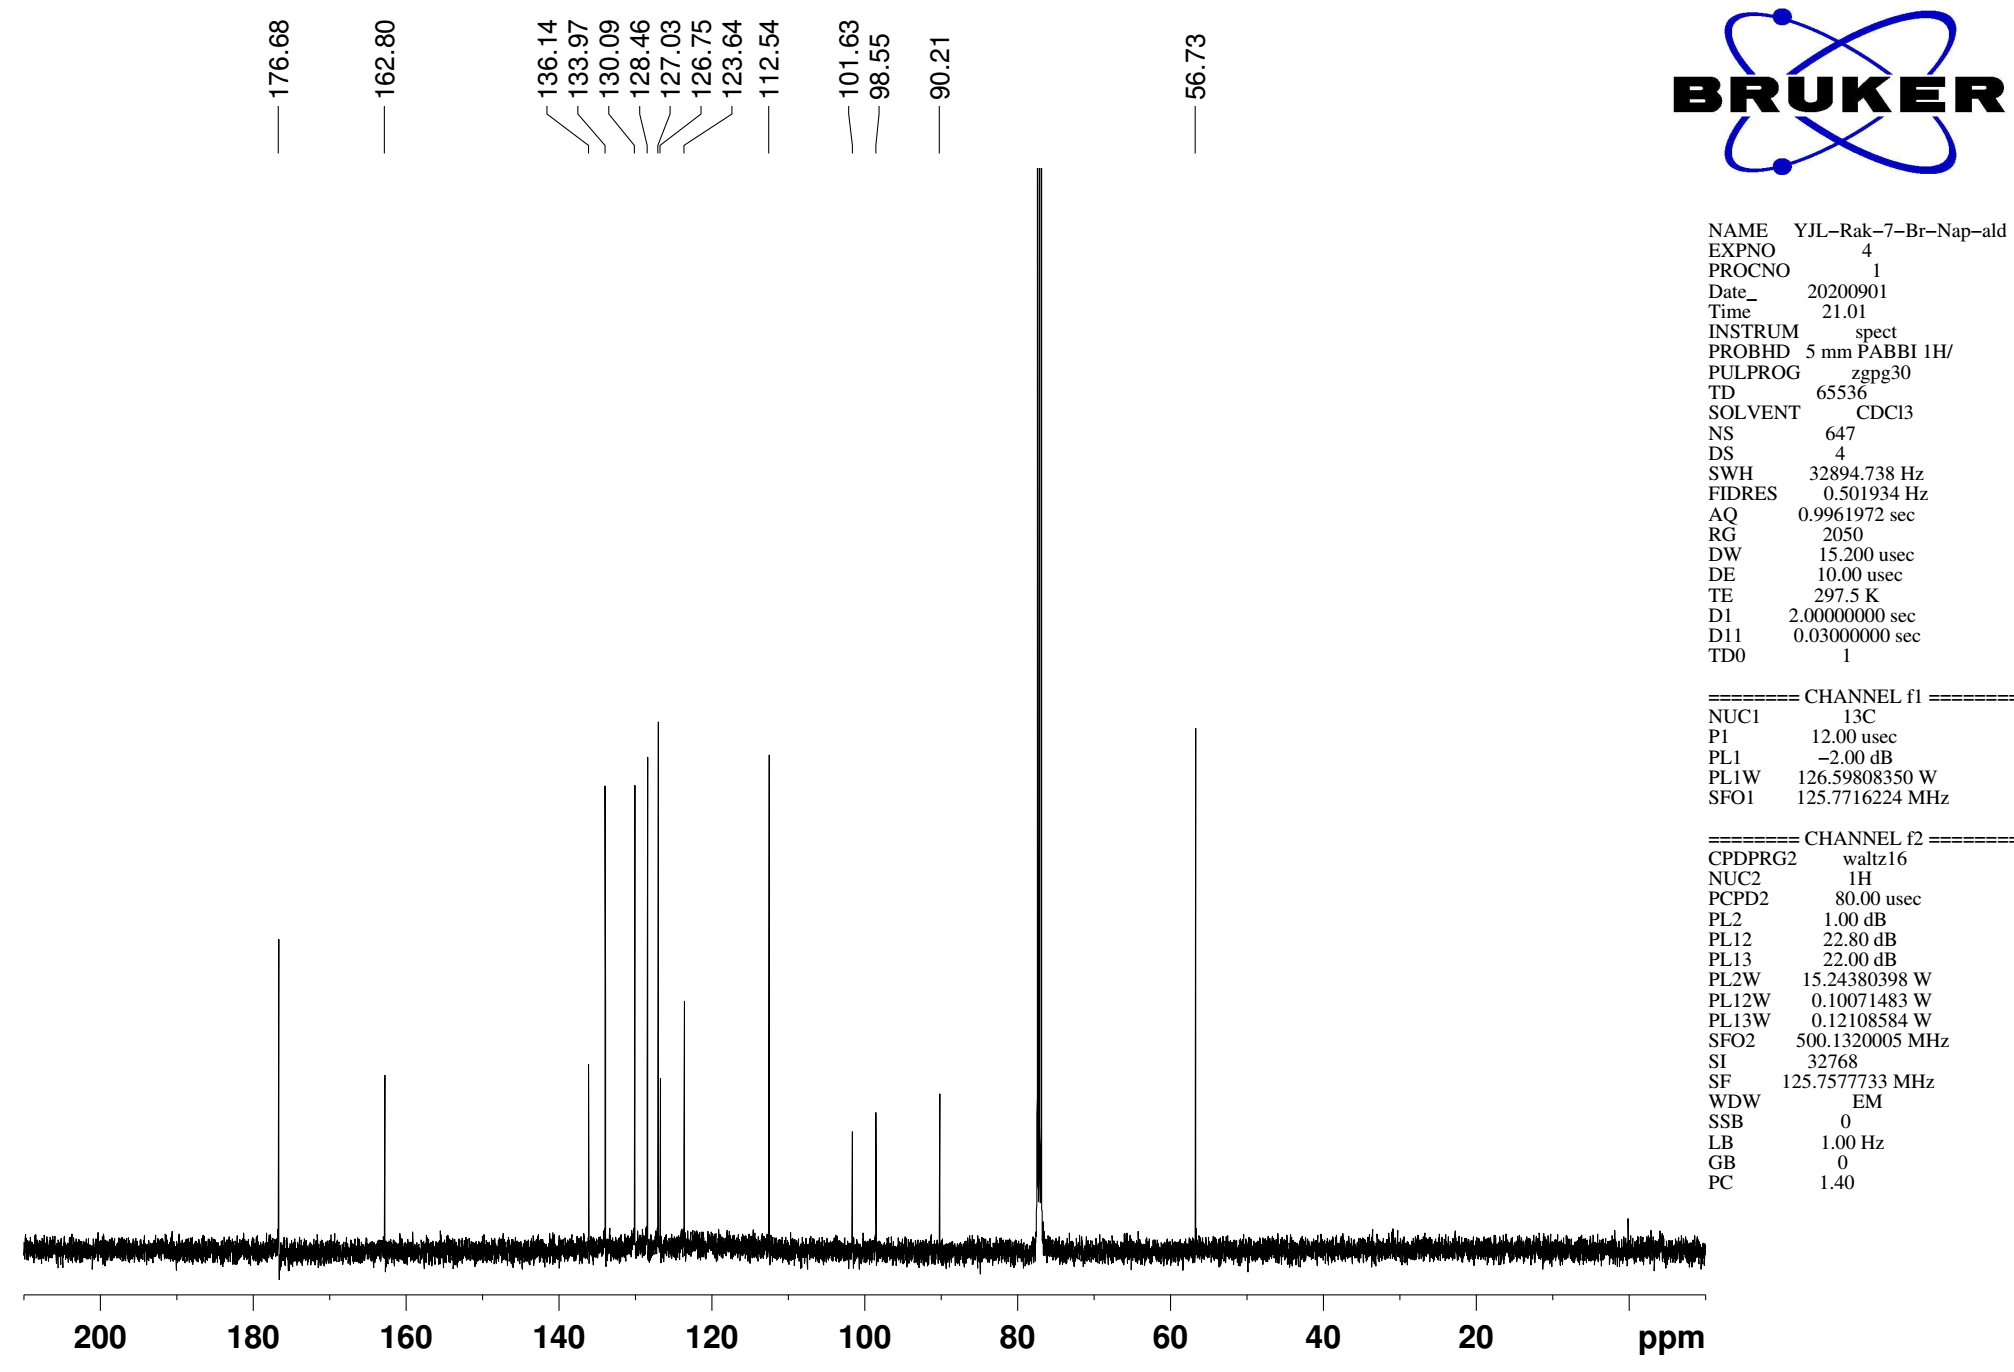


Supplementary Figure 24. 13C NMR (CDCl3, 126MHz) spectra of spectra of substrate 1aa


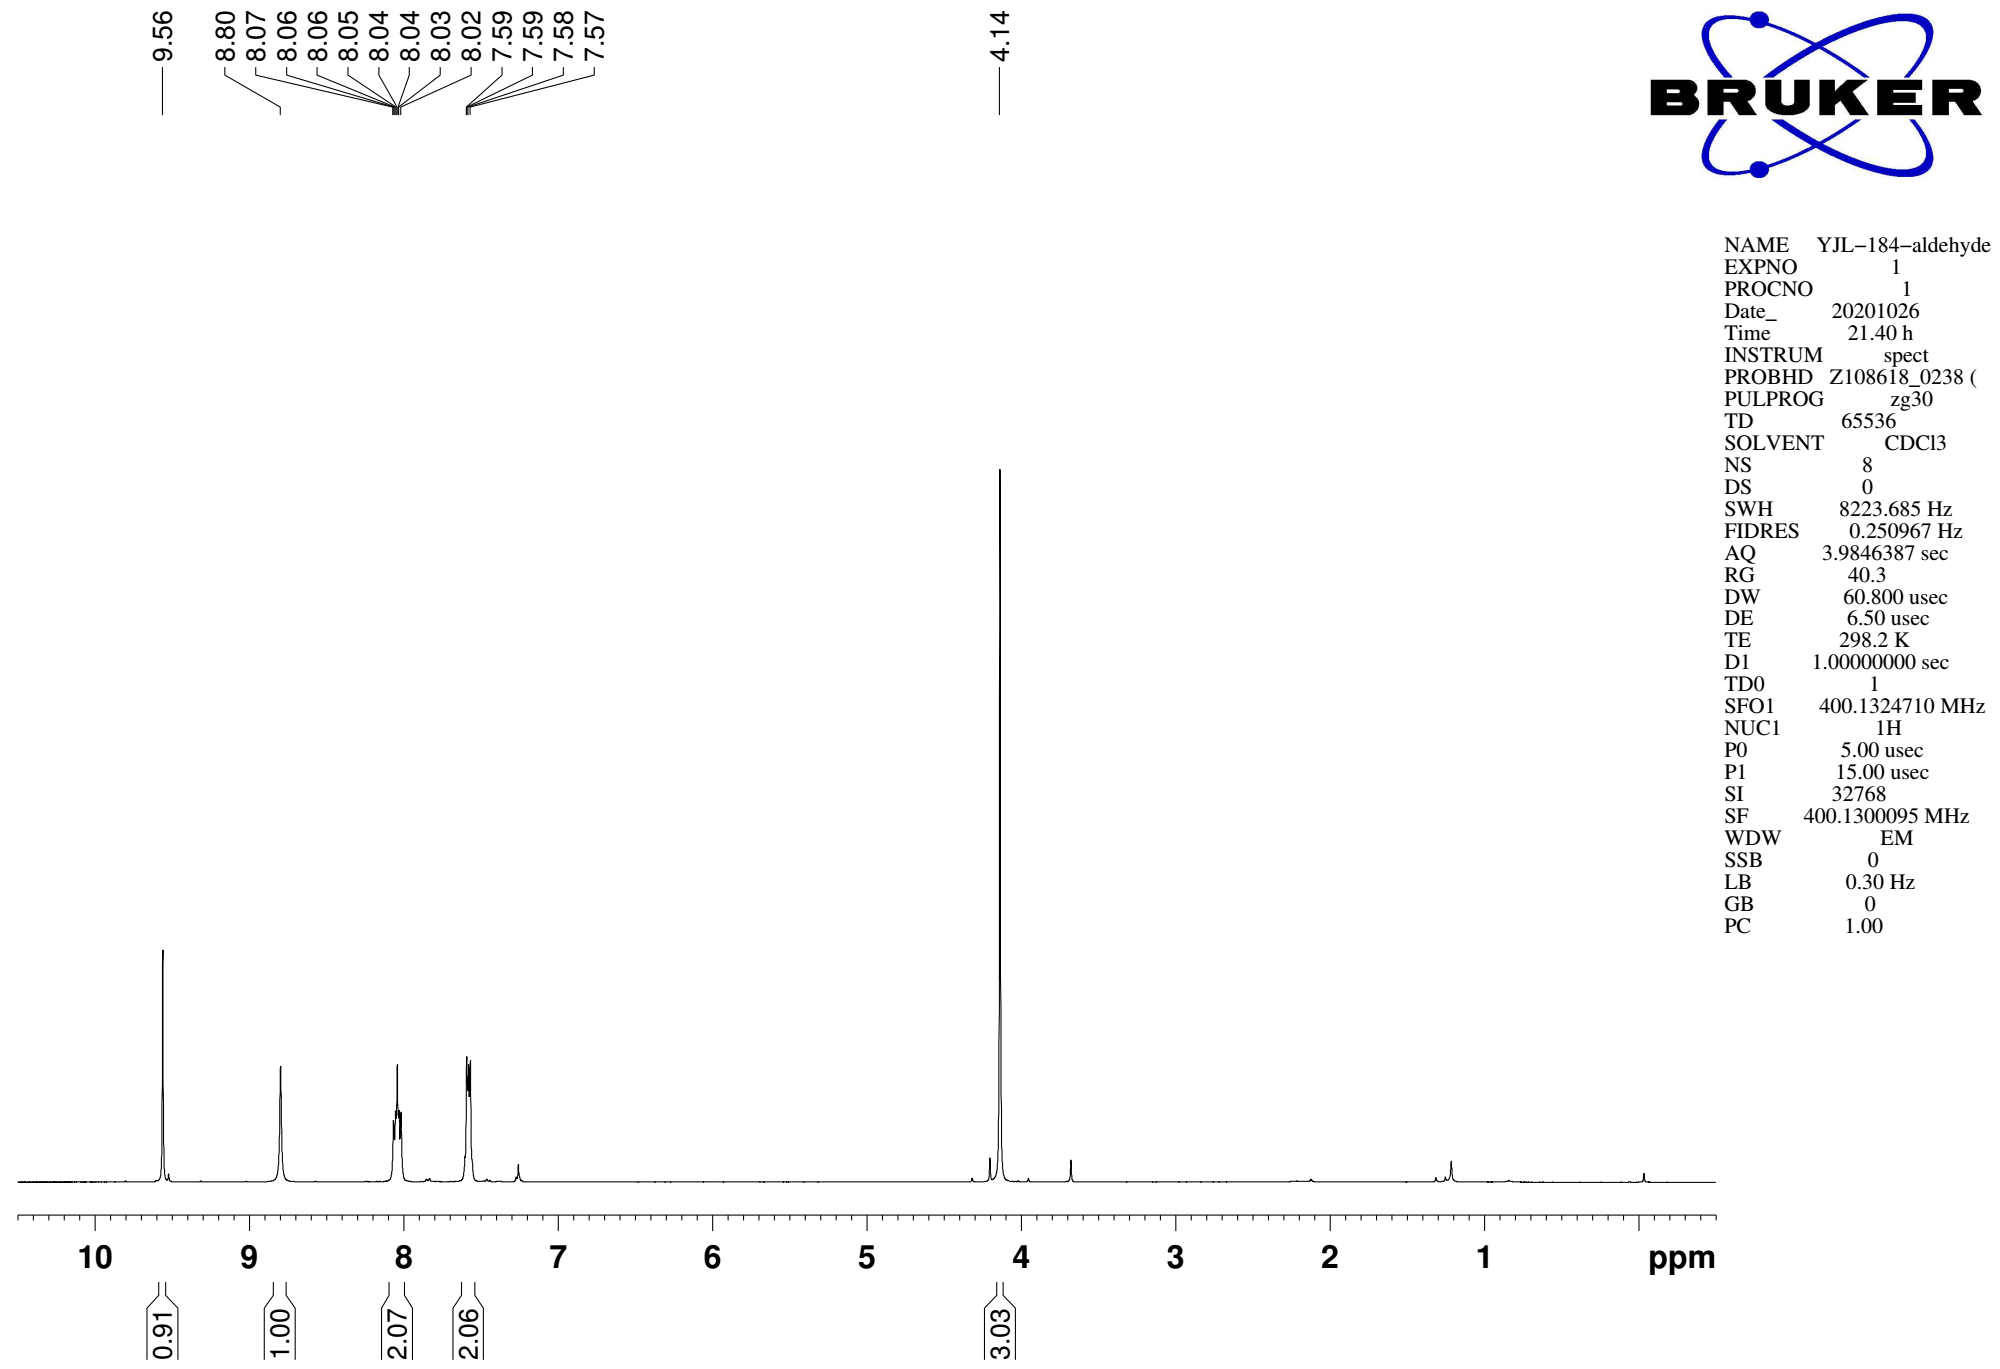


Supplementary Figure 25. 1H NMR (CDCl3, 400MHz) spectra of substrate 1ab


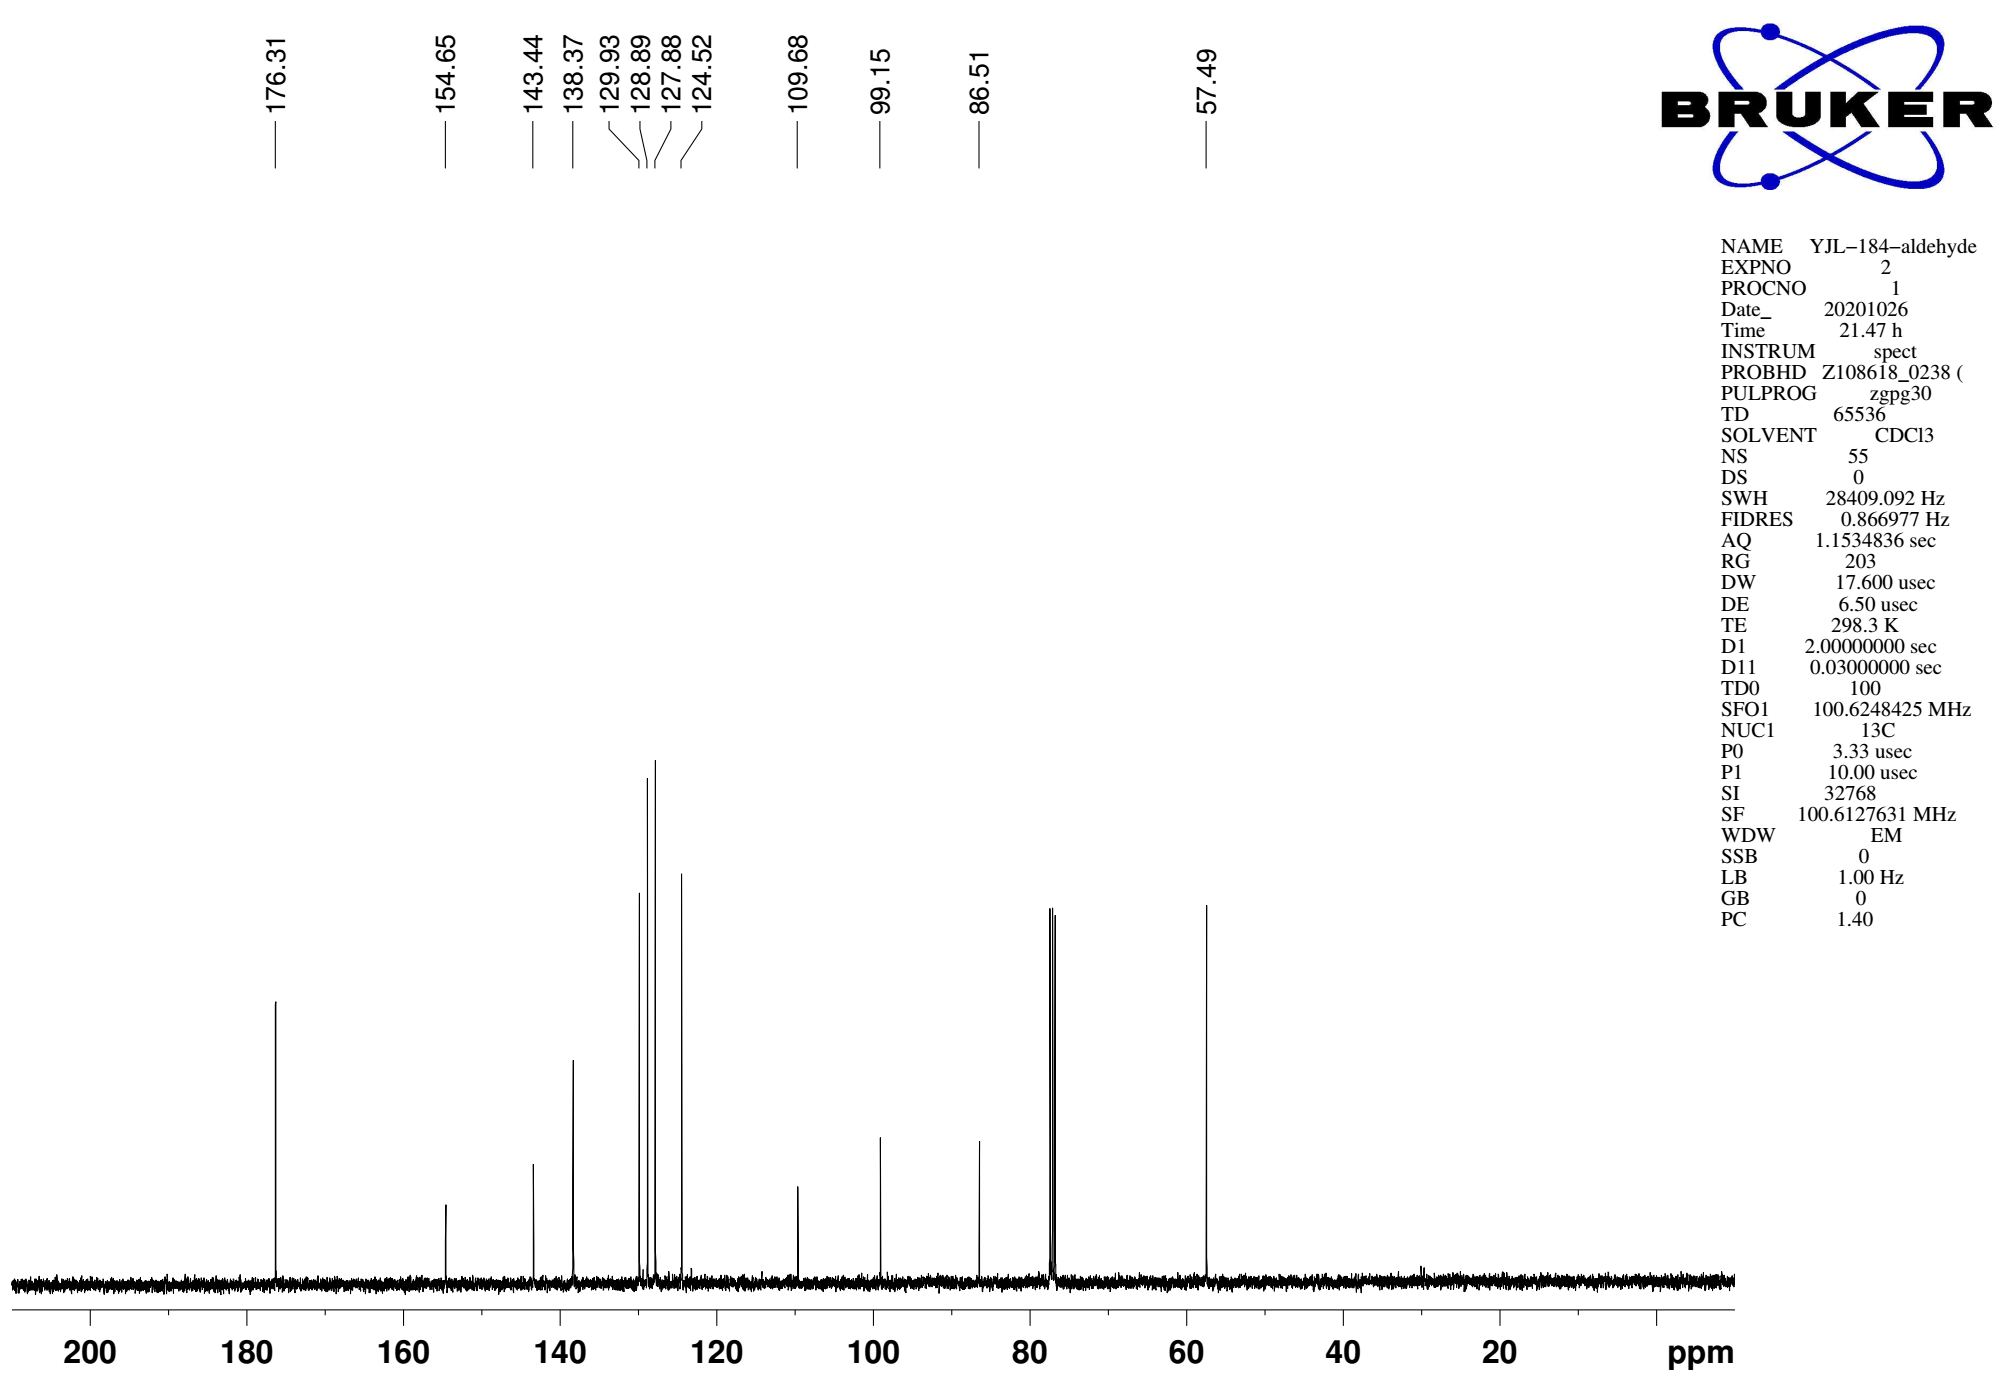


Supplementary Figure 26. 13C NMR (CDCl3, 101MHz) spectra of spectra of substrate 1ab


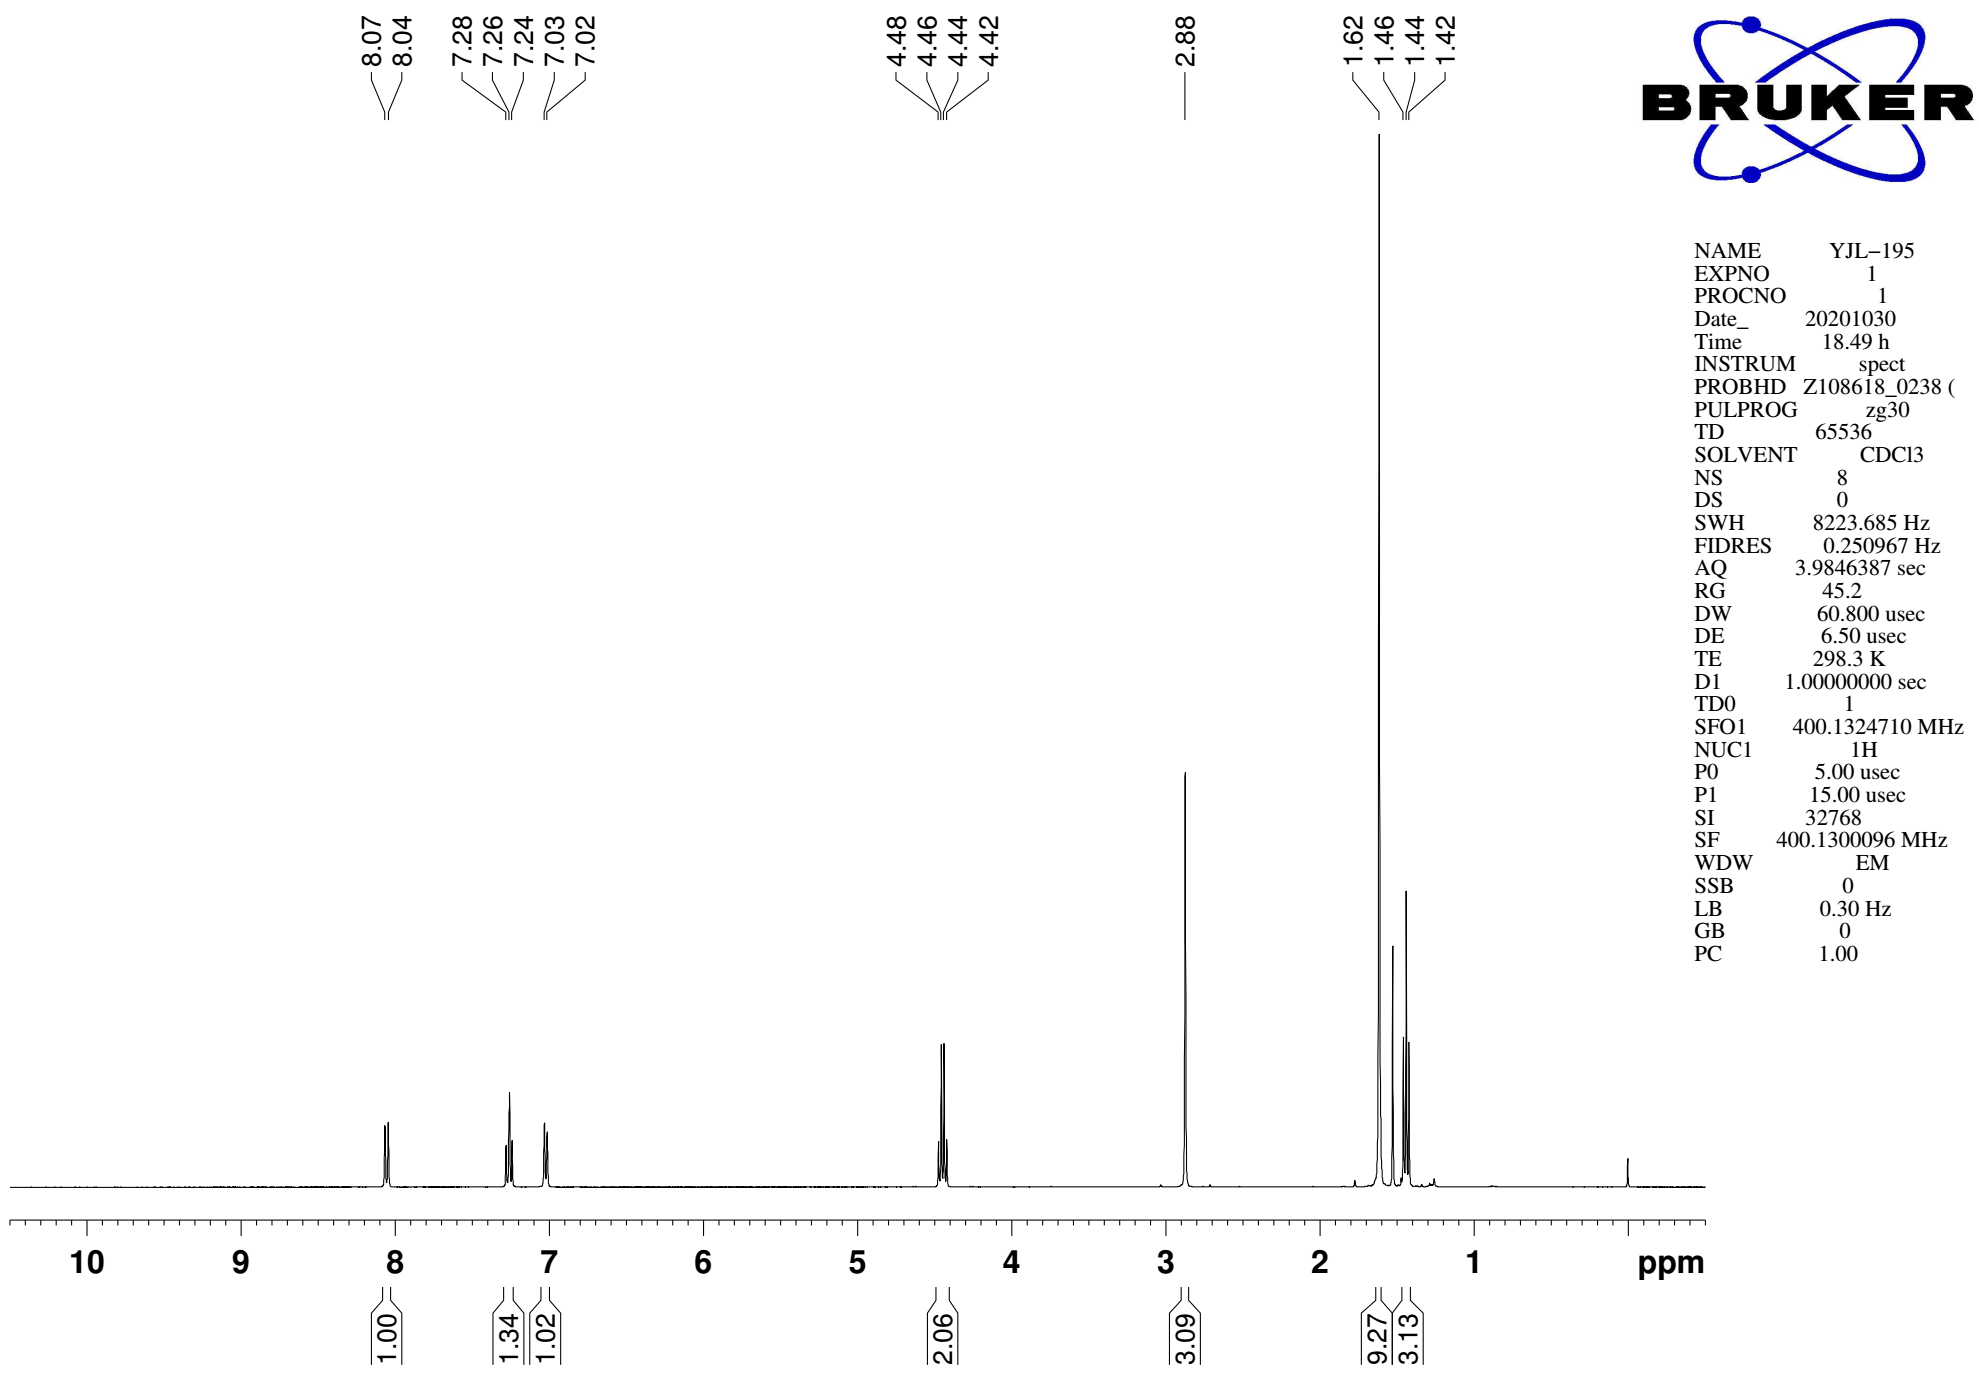


Supplementary Figure 27. 1H NMR (CDCl3, 400MHz) spectra of S16


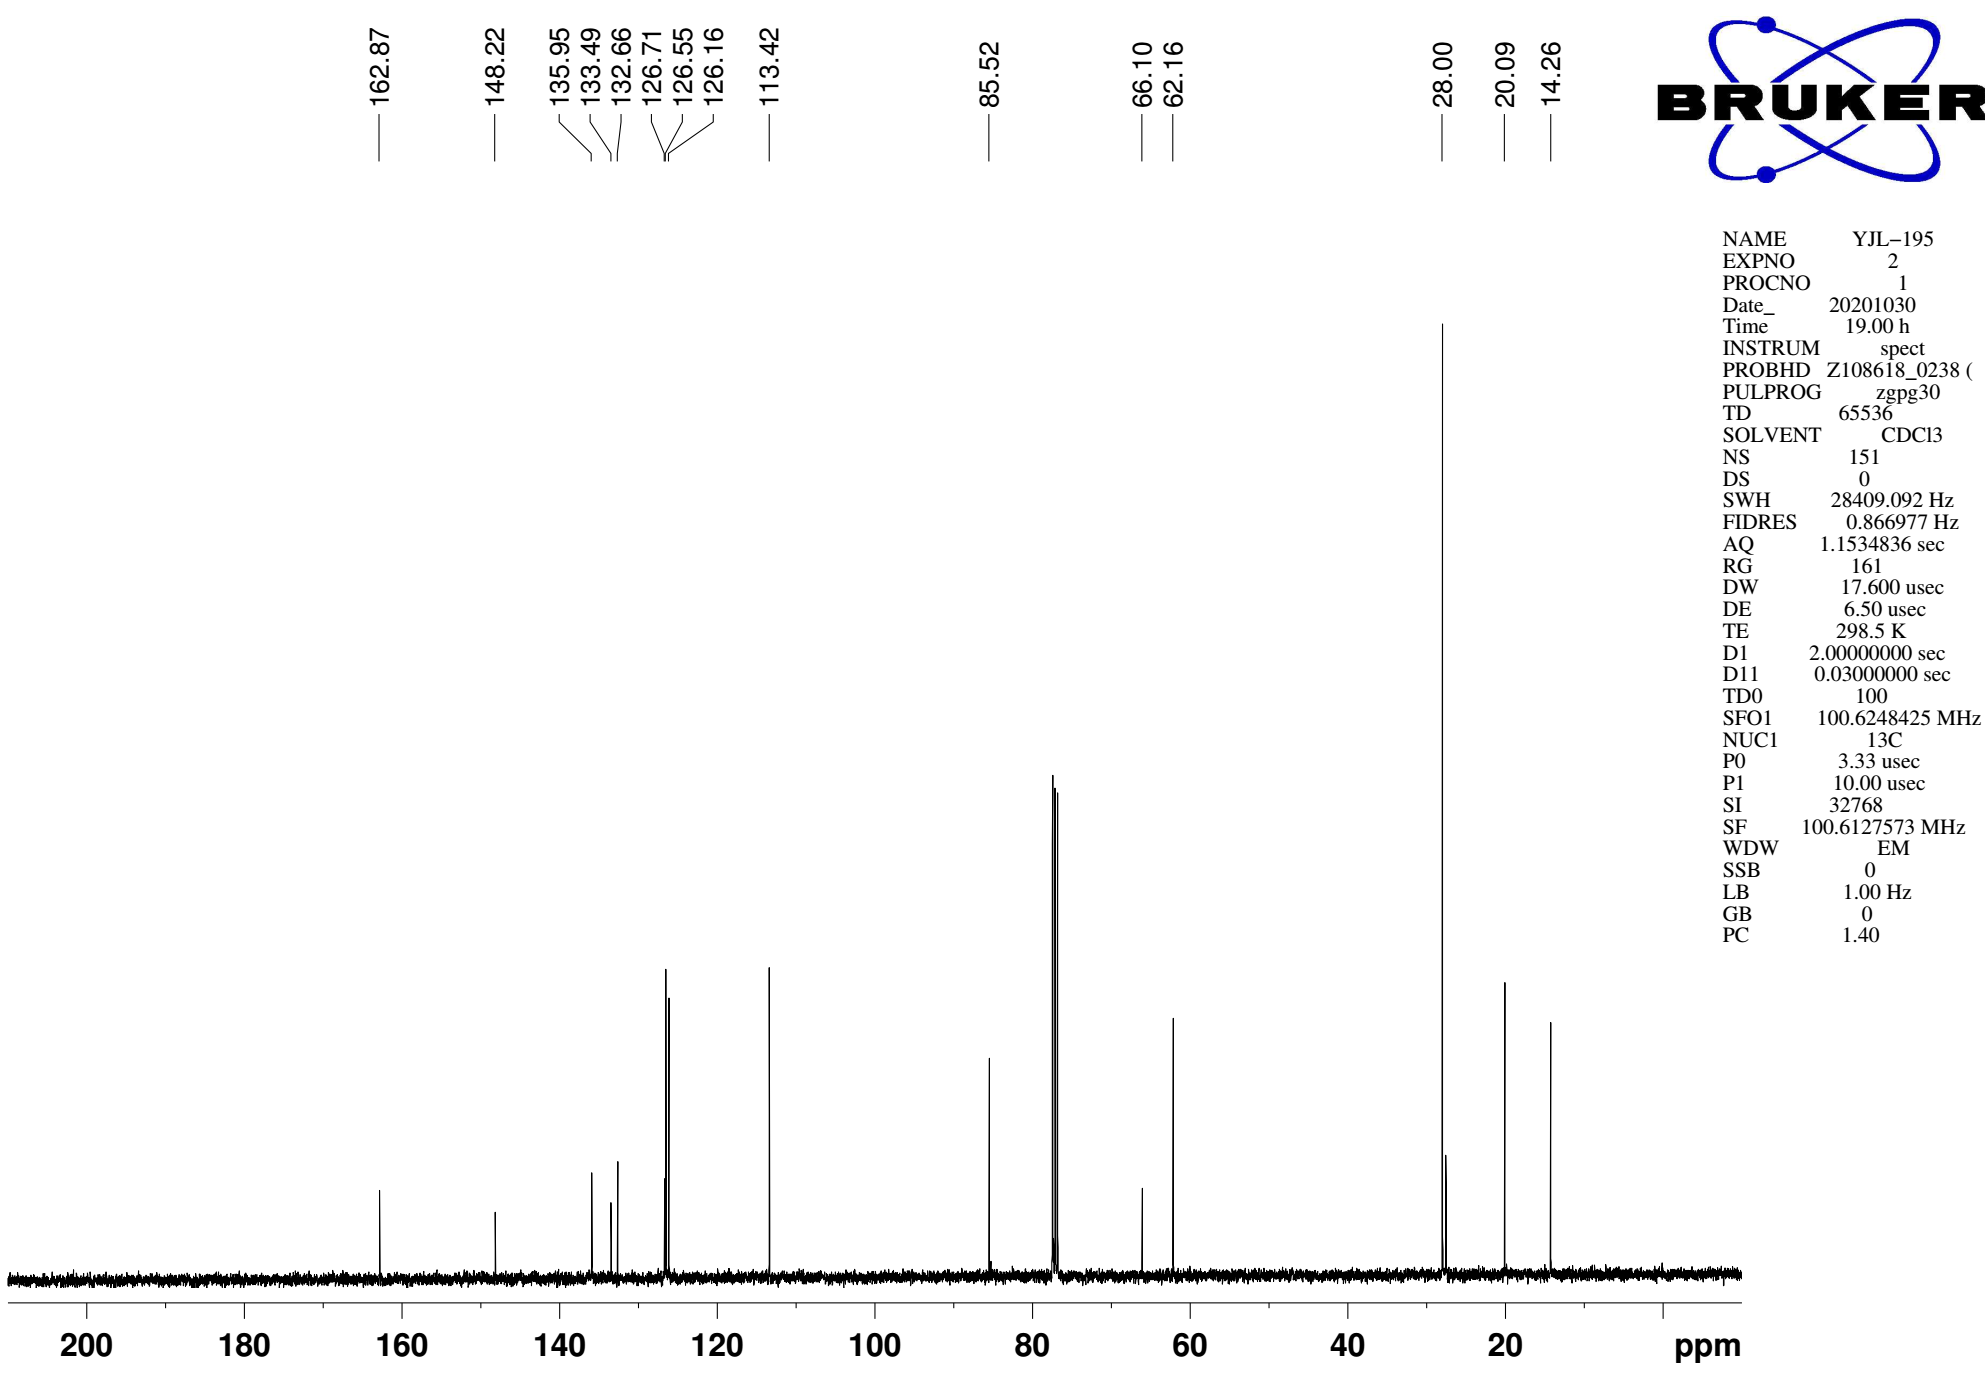


Supplementary Figure 28. 13C NMR (CDCl3, 101MHz) spectra of spectra of S16


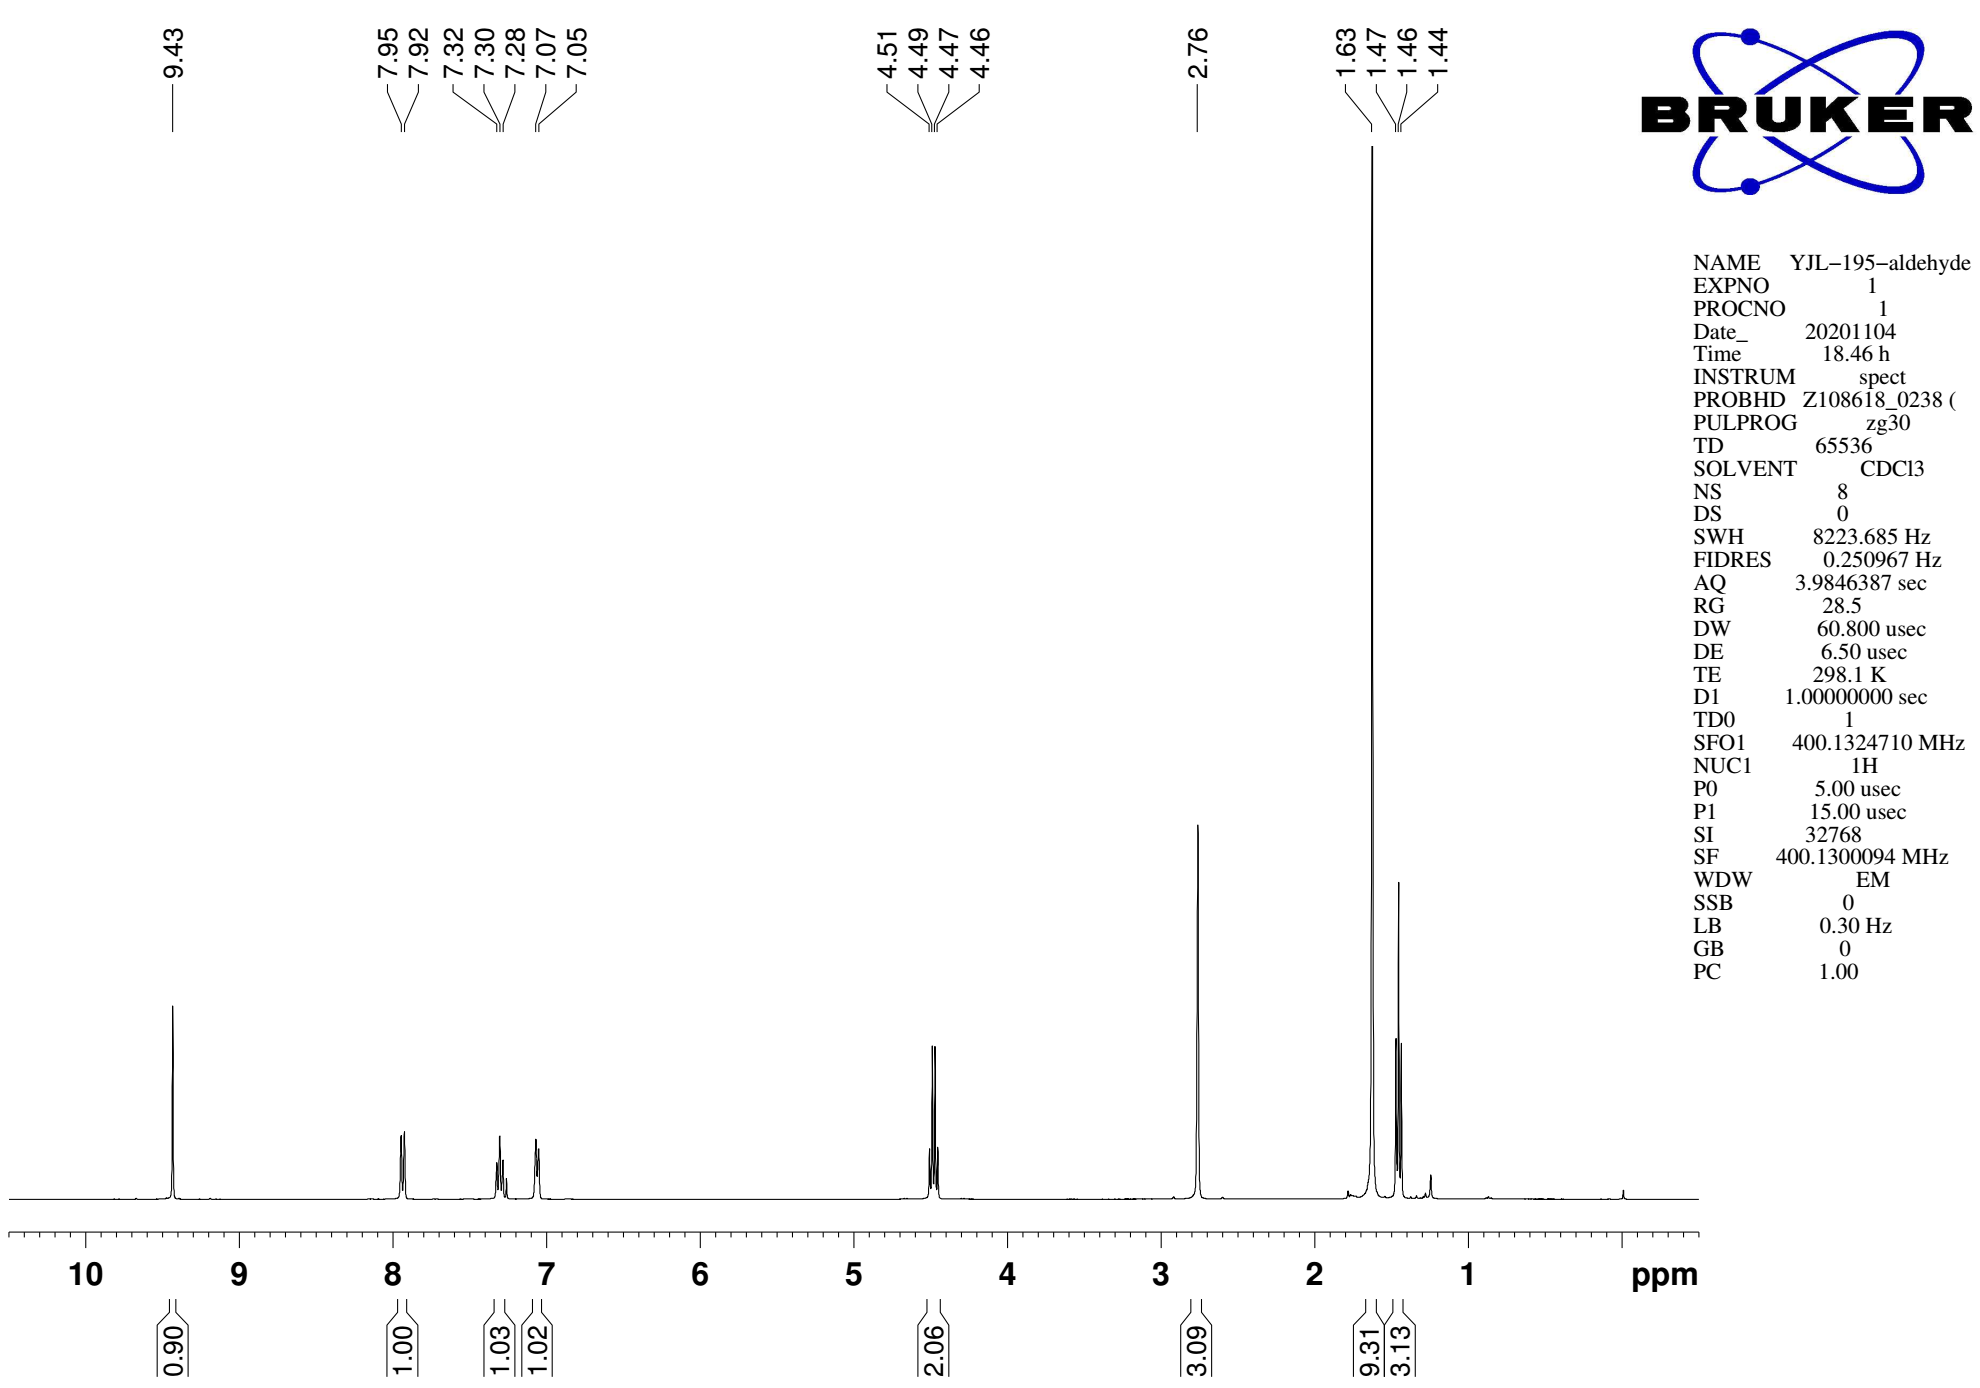


Supplementary Figure 29. 1H NMR (CDCl3, 400MHz) spectra of substrate 1ac


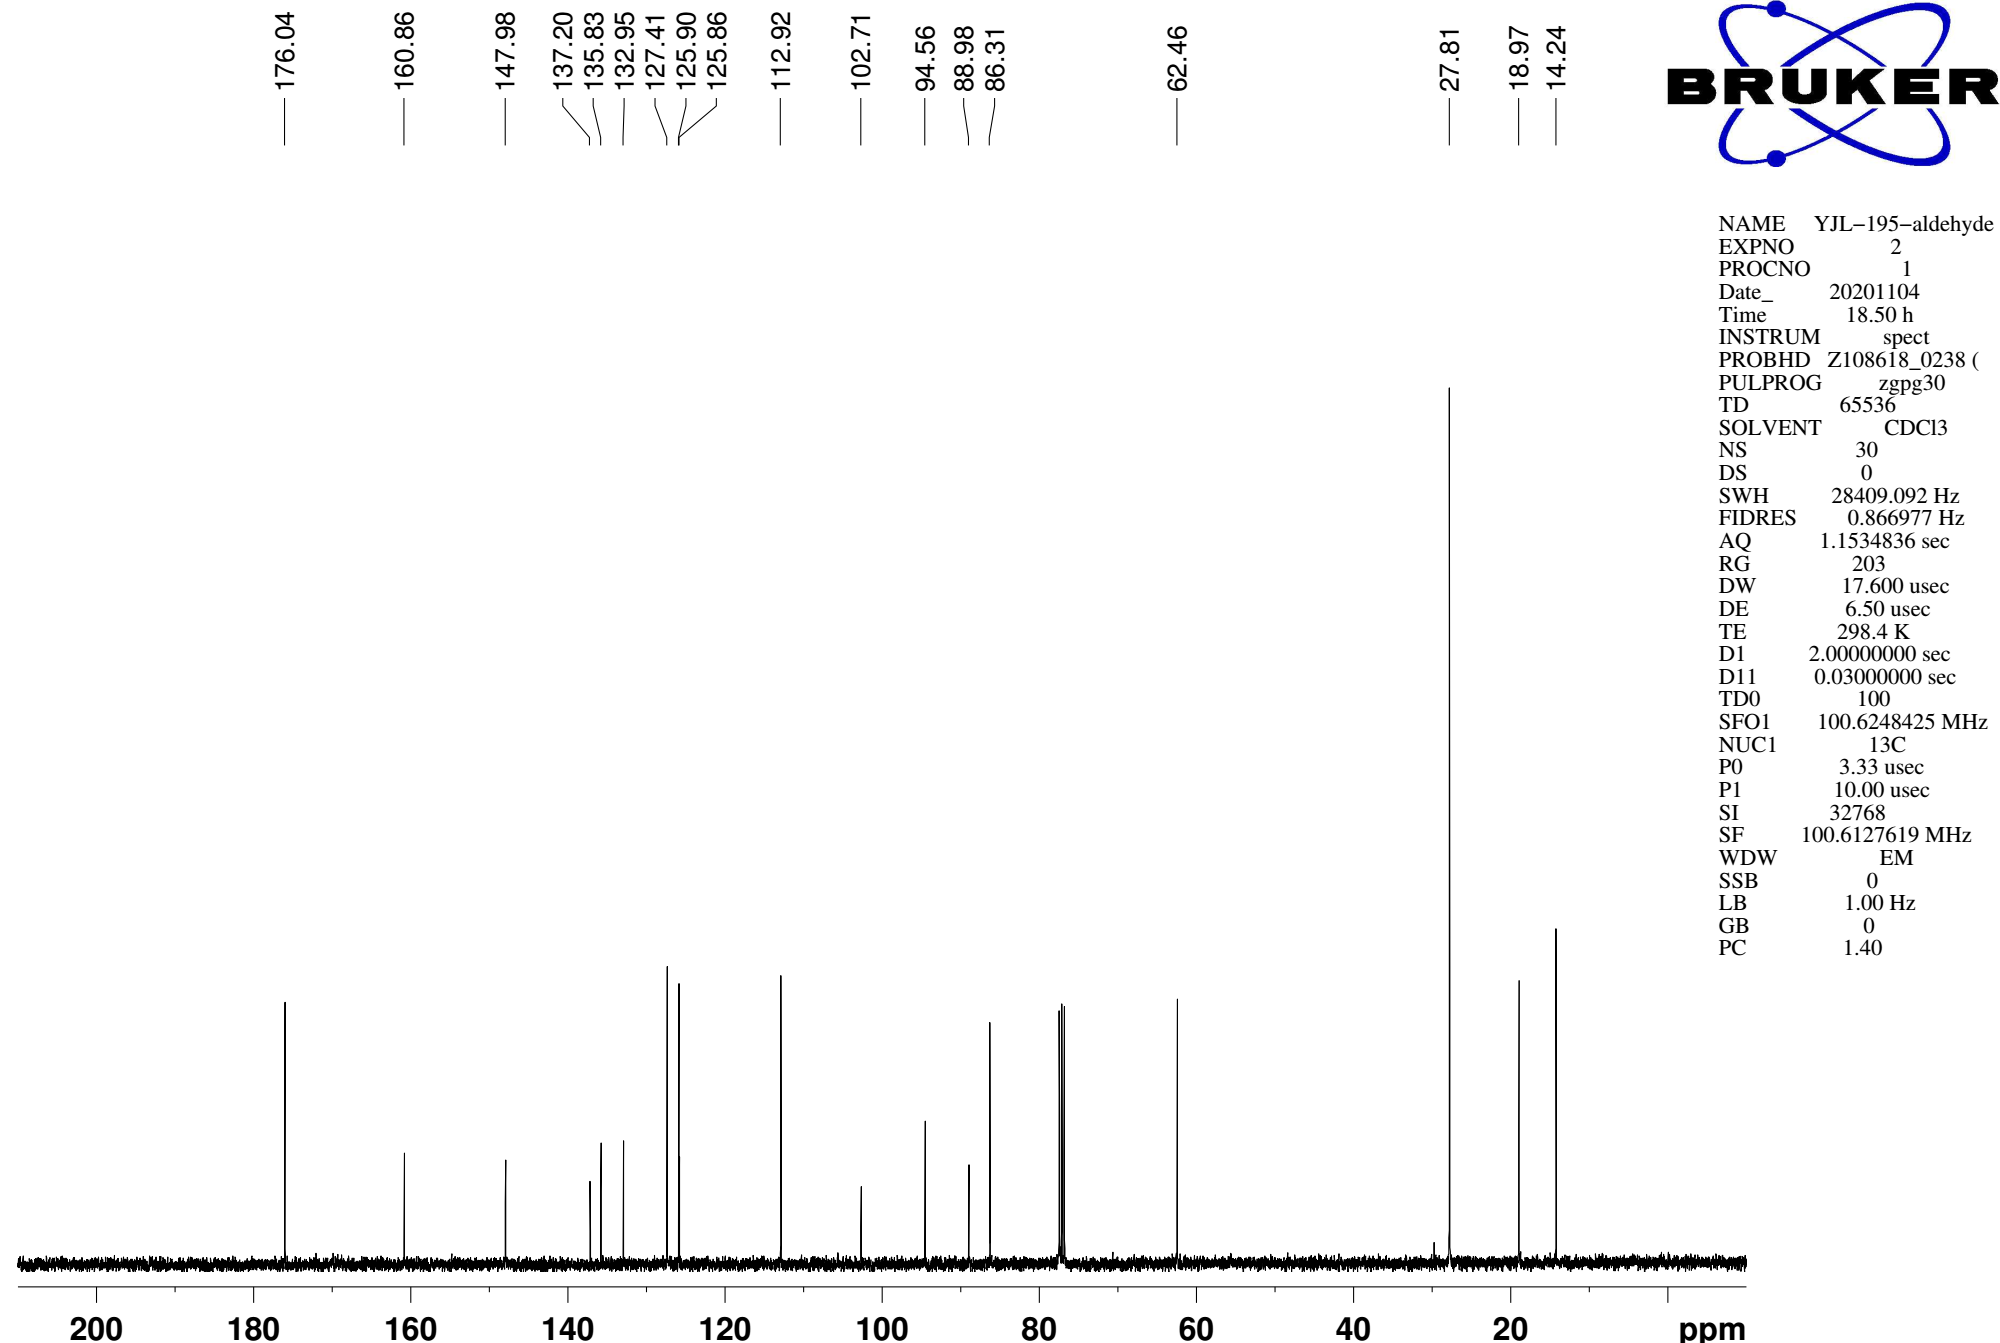


Supplementary Figure 30. 13C NMR (CDCl3, 101MHz) spectra of spectra of substrate 1ac


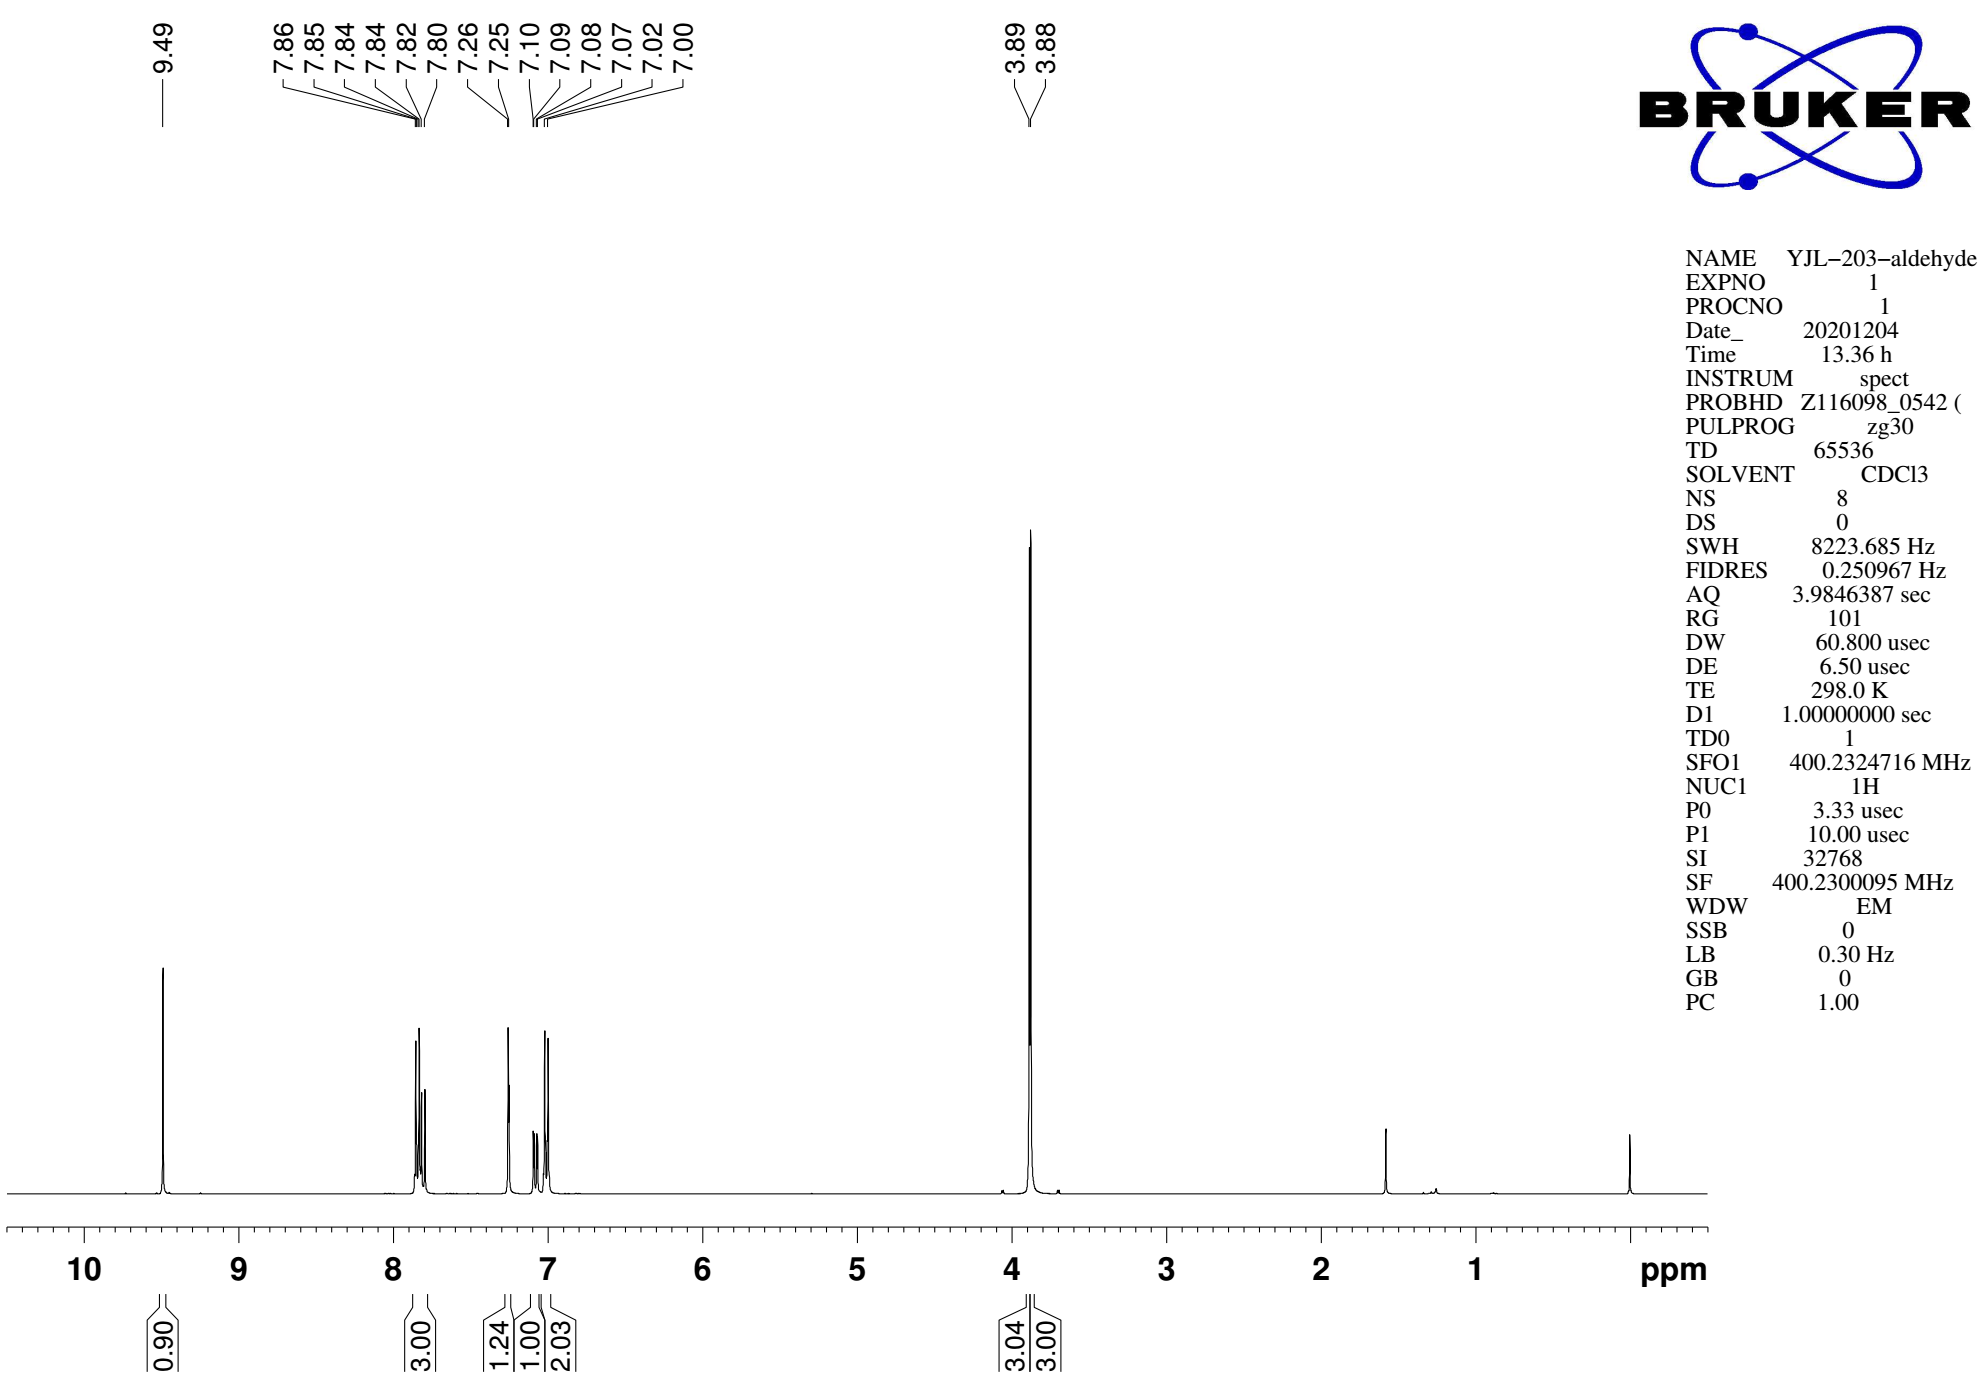


Supplementary Figure 31. 1H NMR (CDCl3, 400MHz) spectra of substrate 1ad


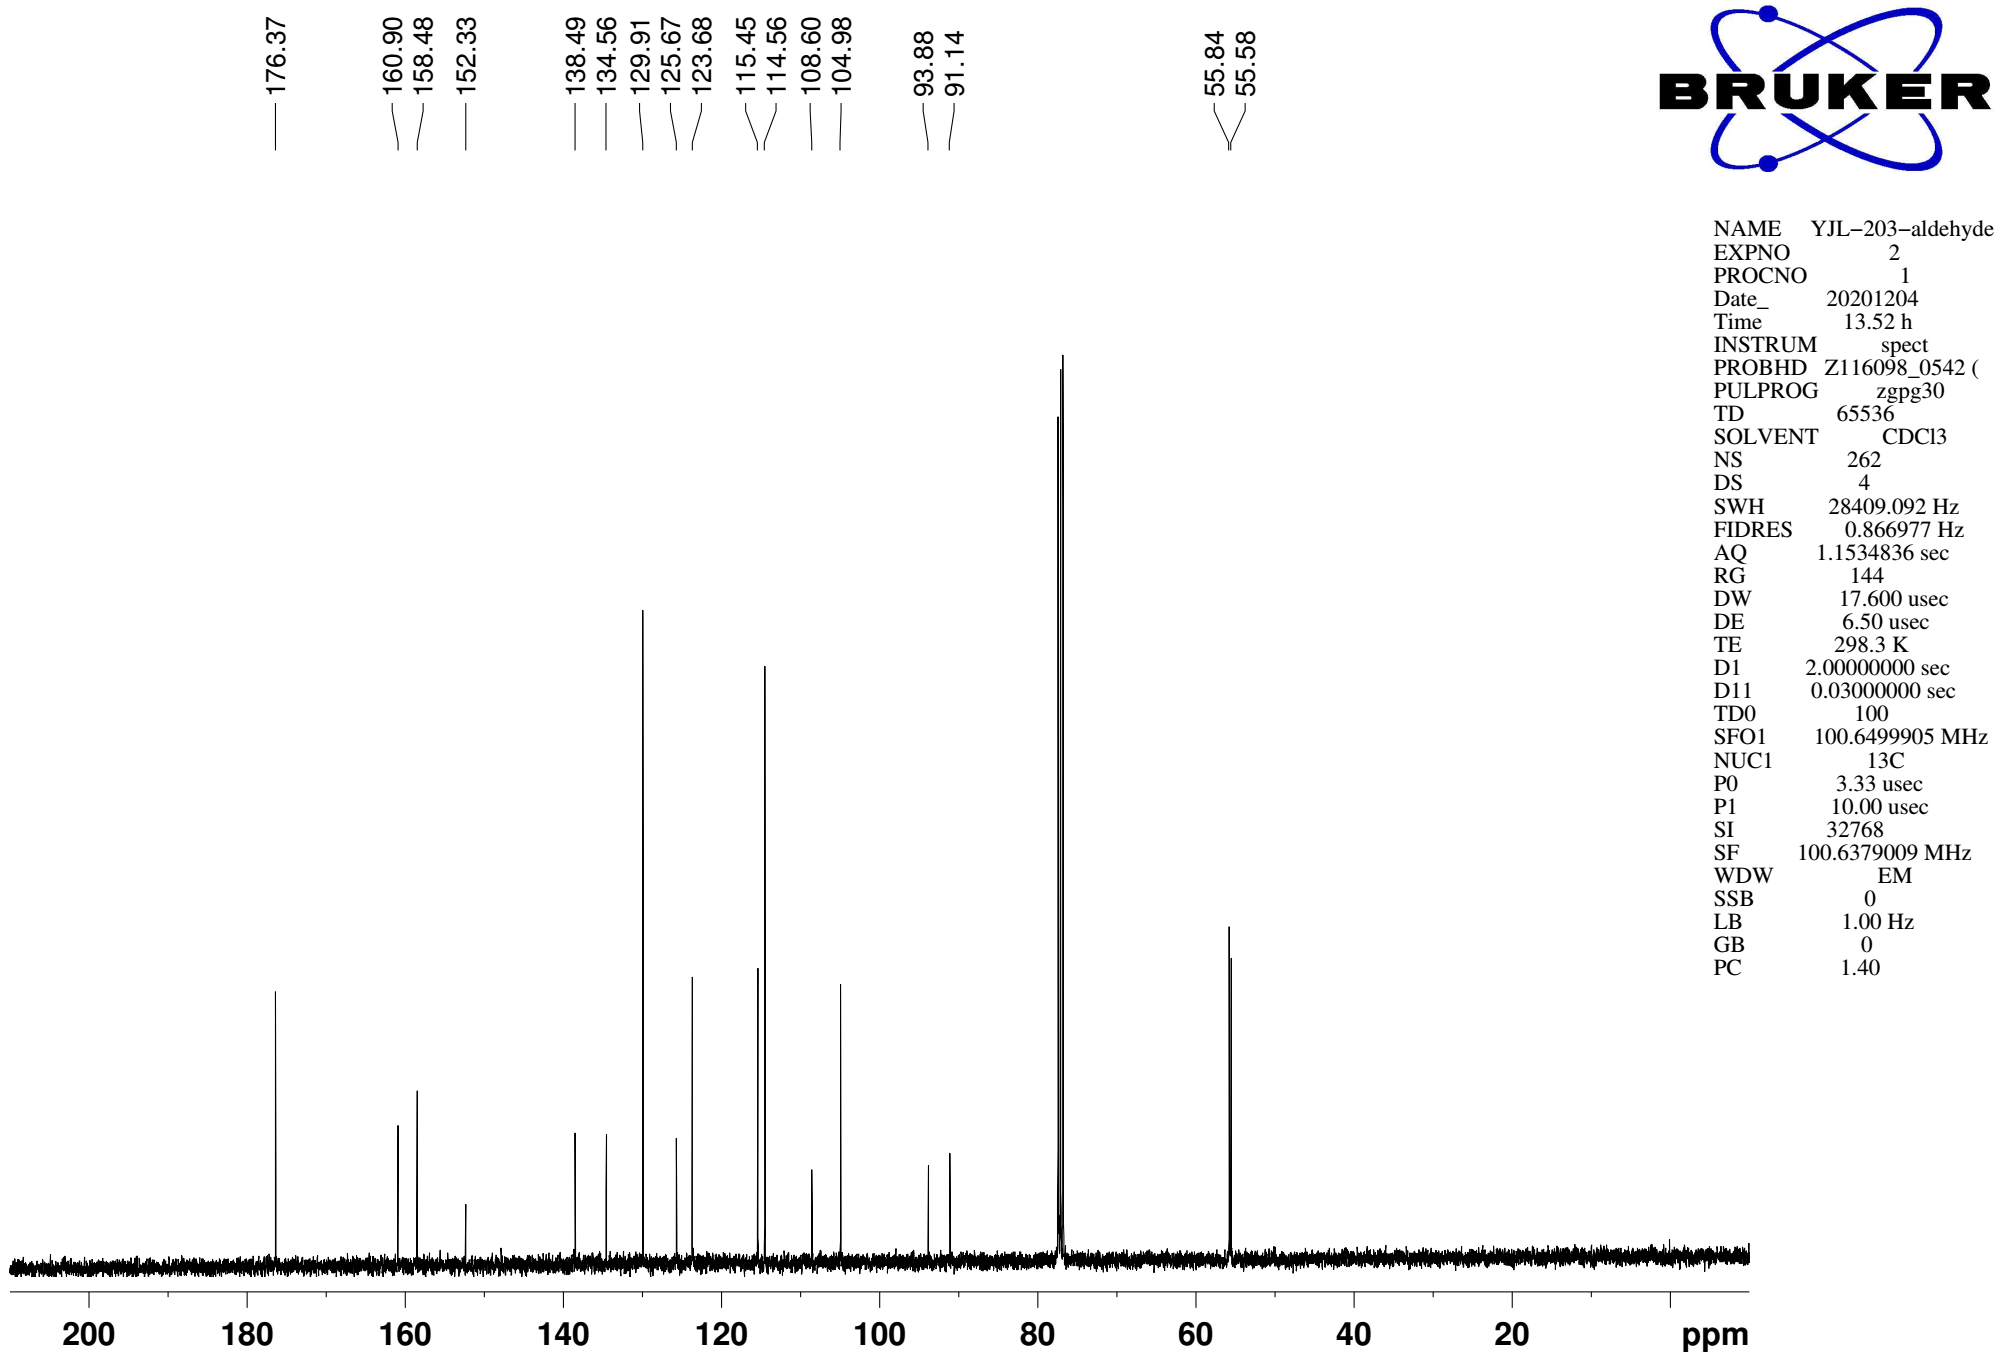


Supplementary Figure 32. 13C NMR (CDCl3, 101MHz) spectra of spectra of substrate 1ad


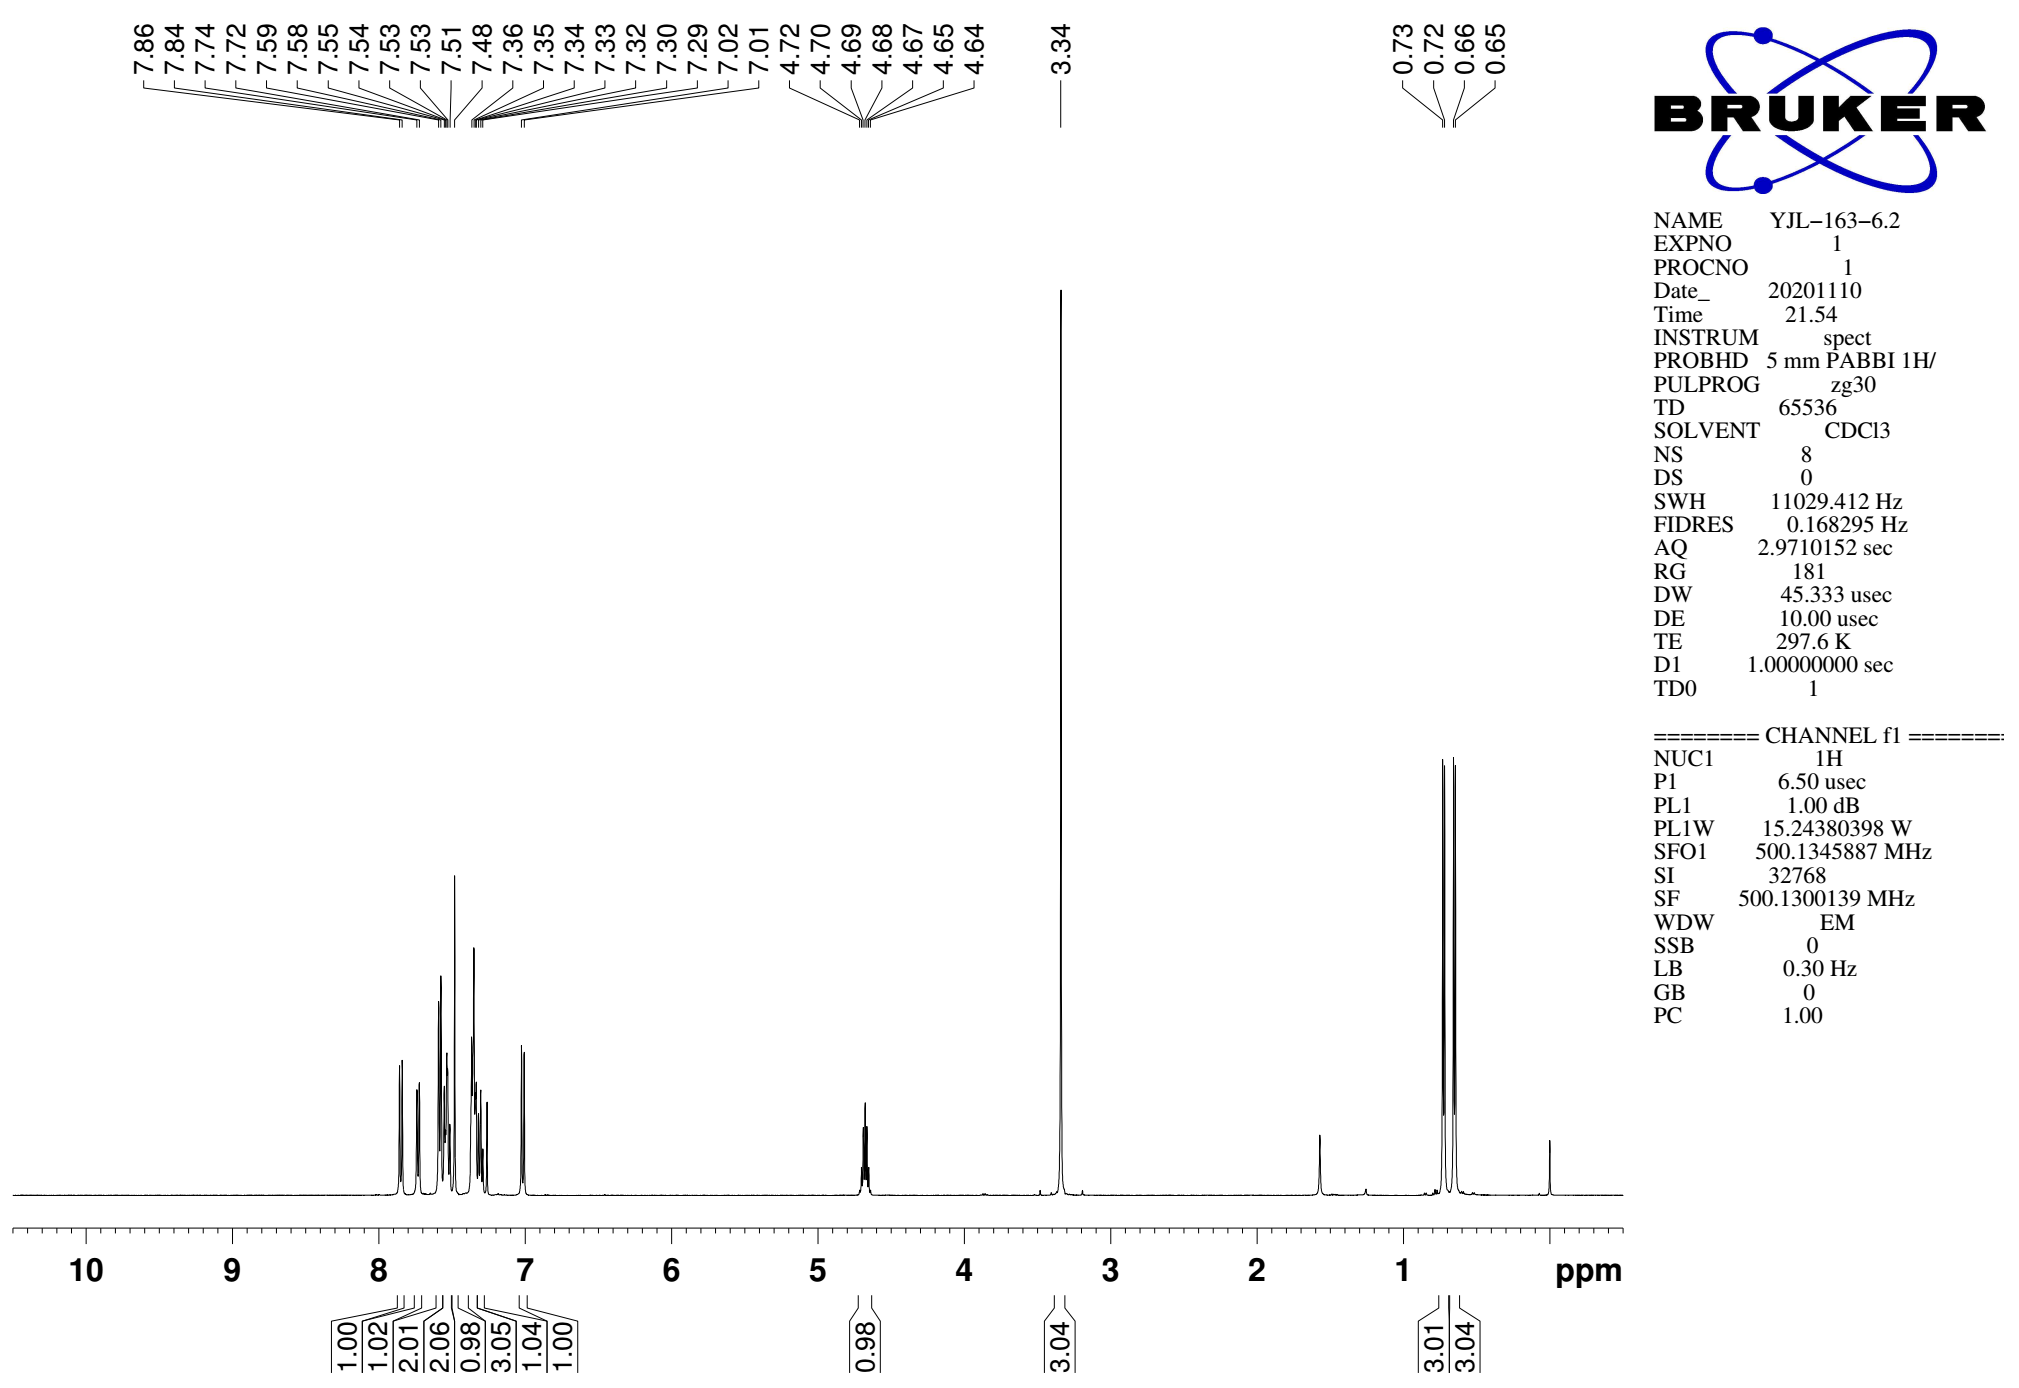


Supplementary Figure 33. 1H NMR (CDCl3, 500MHz) spectra of 3


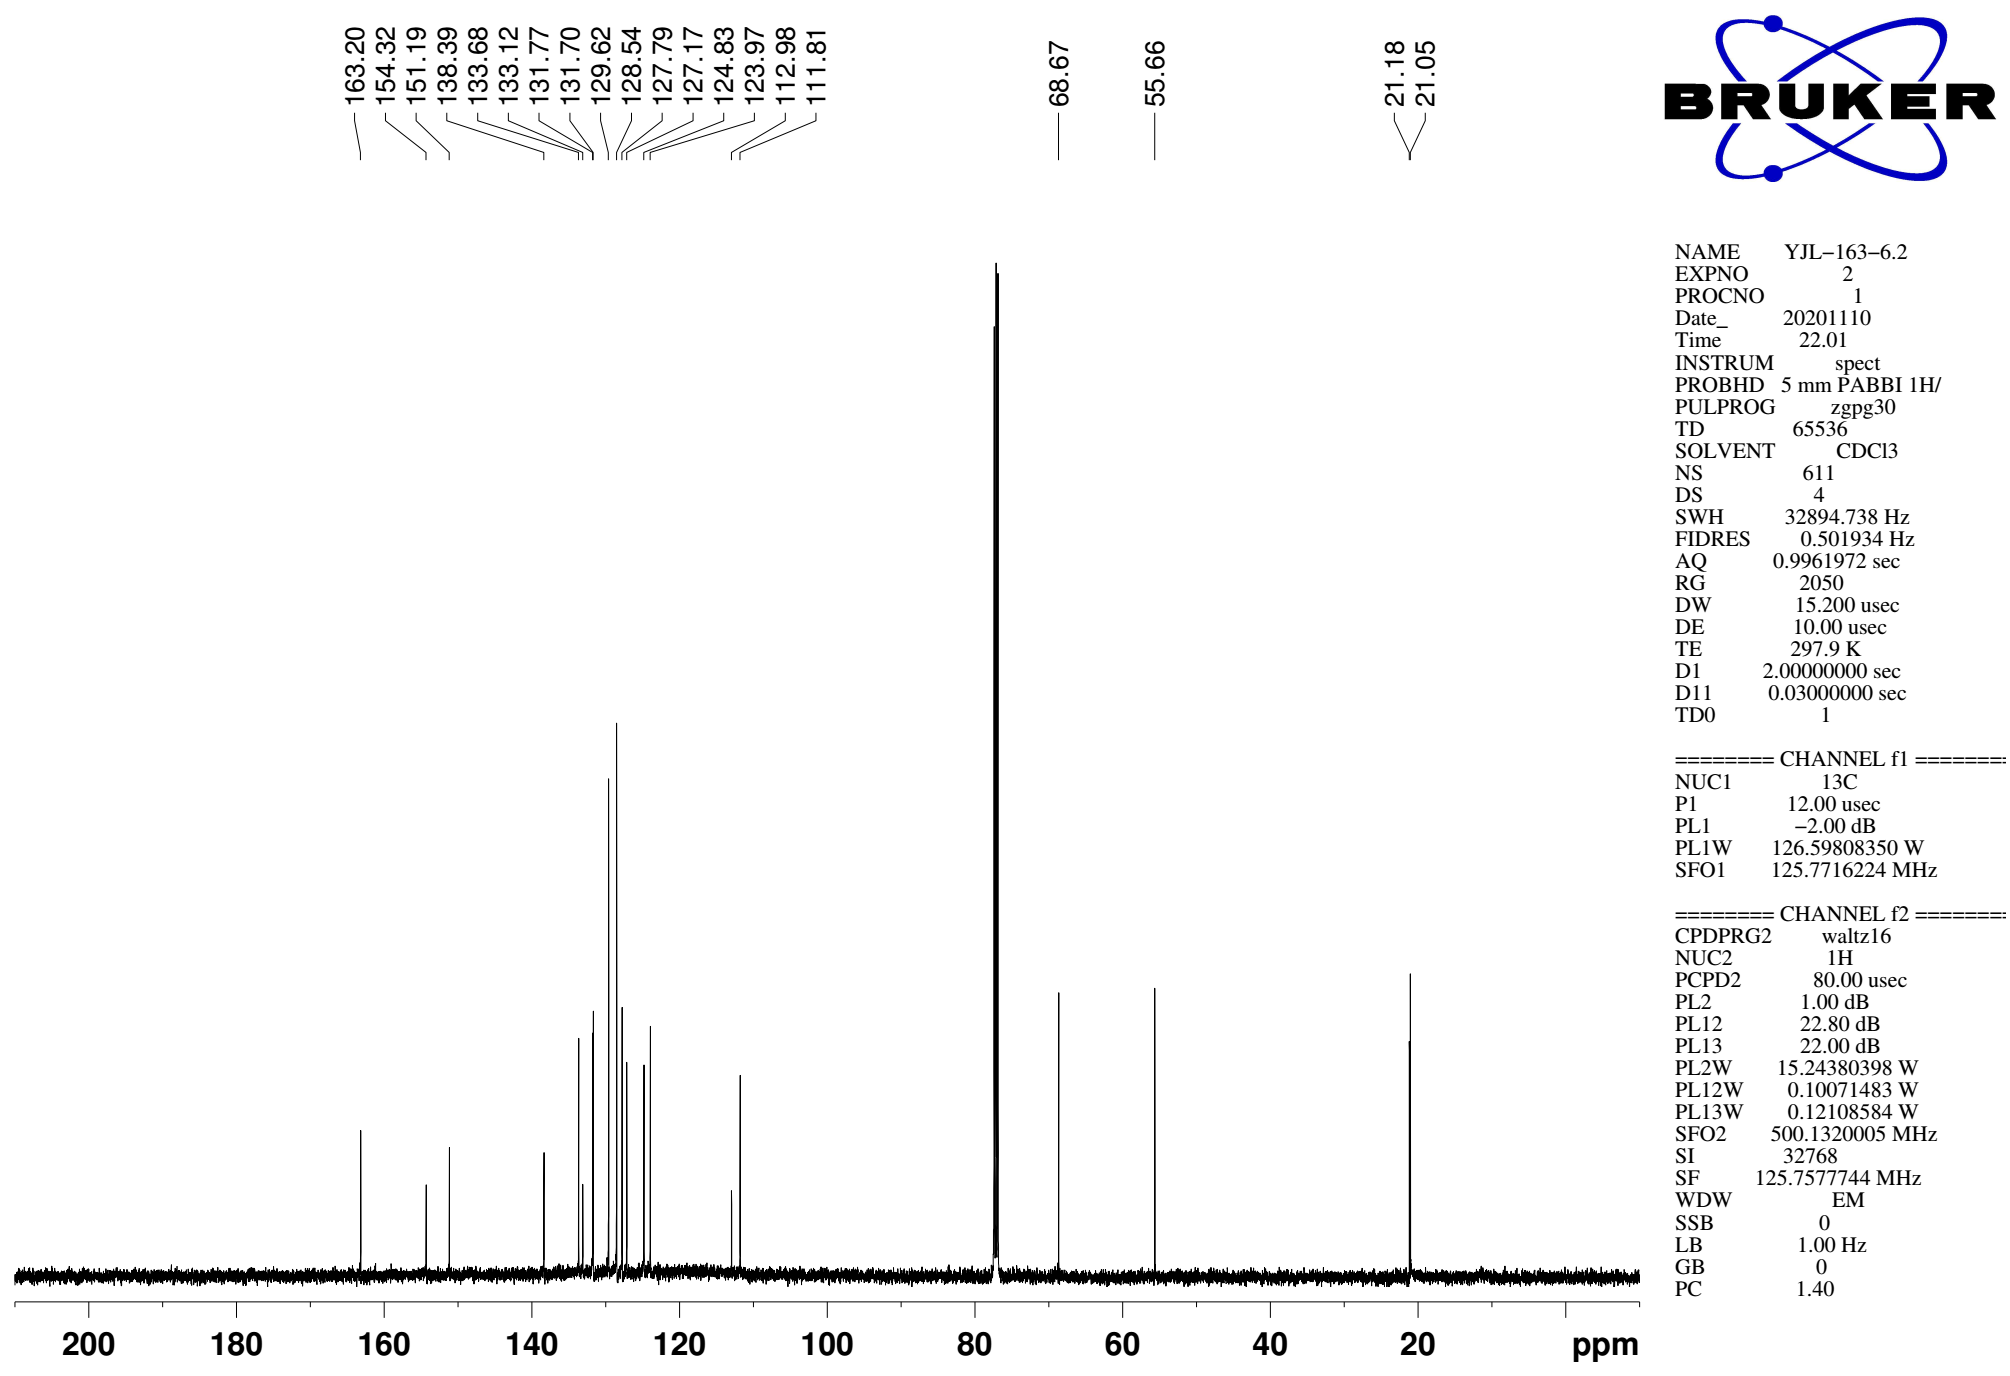


Supplementary Figure 34. 13C NMR (CDCl3, 126MHz) spectra of spectra of 3


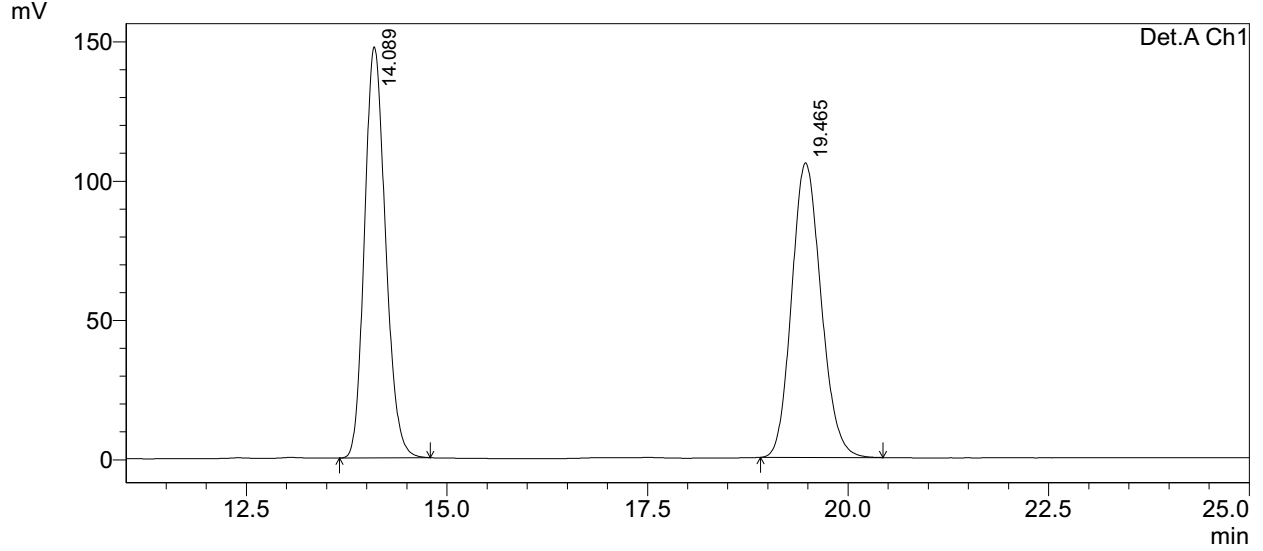


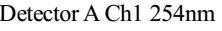


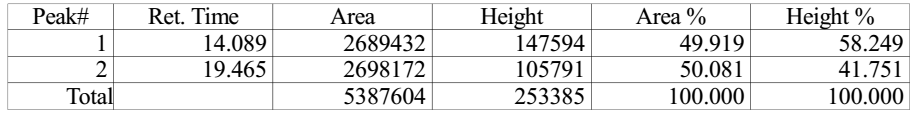


Axially chiral styrene 3 (prepared by NHC catalytic reaction)


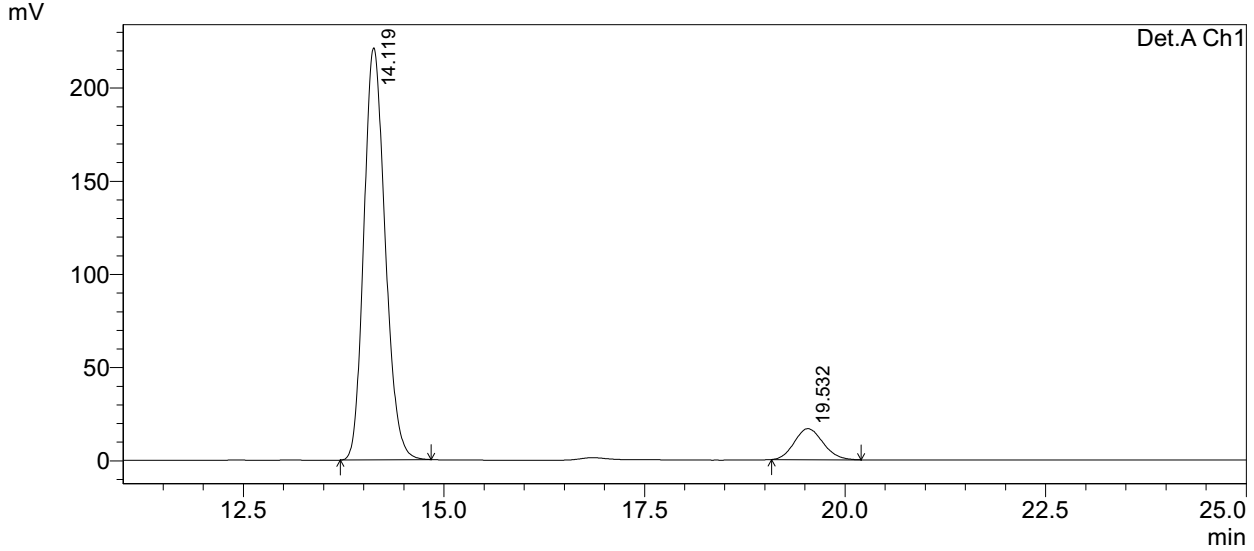


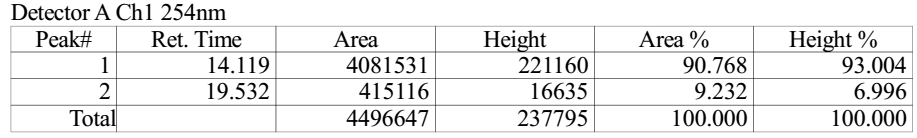


Supplementary Figure 35. HPLC spectra of 3 (prepared by NHC catalytic reaction)

Axially chiral styrene 3 (prepared by transesterification)


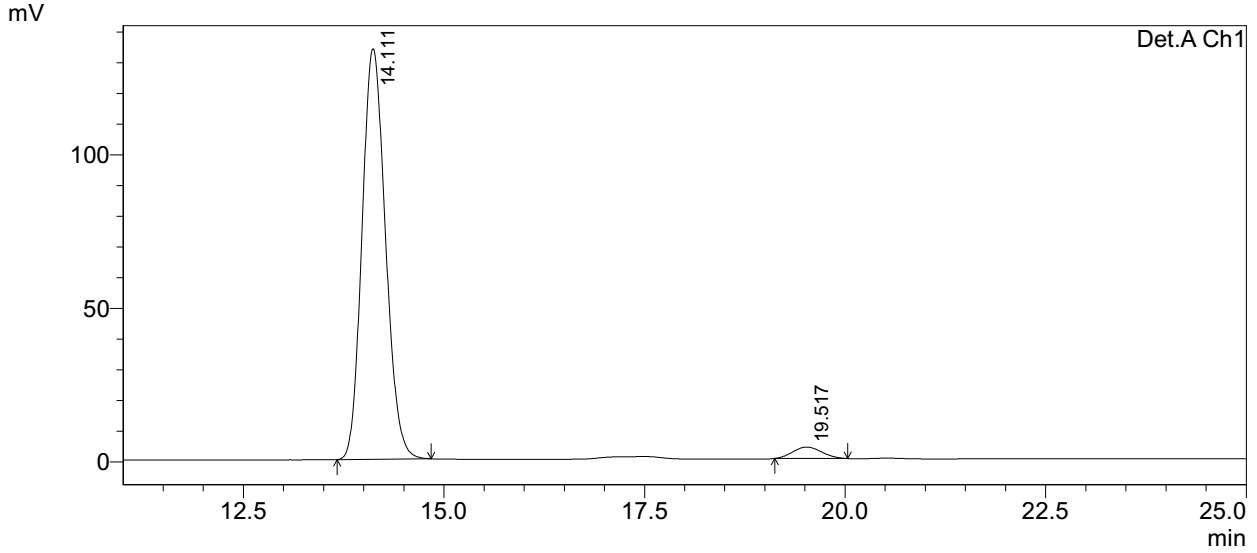


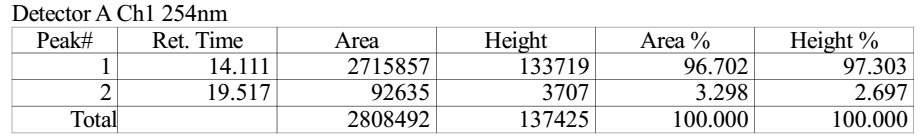


Supplementary Figure 36. HPLC spectra of 3 (prepared by transesterification)


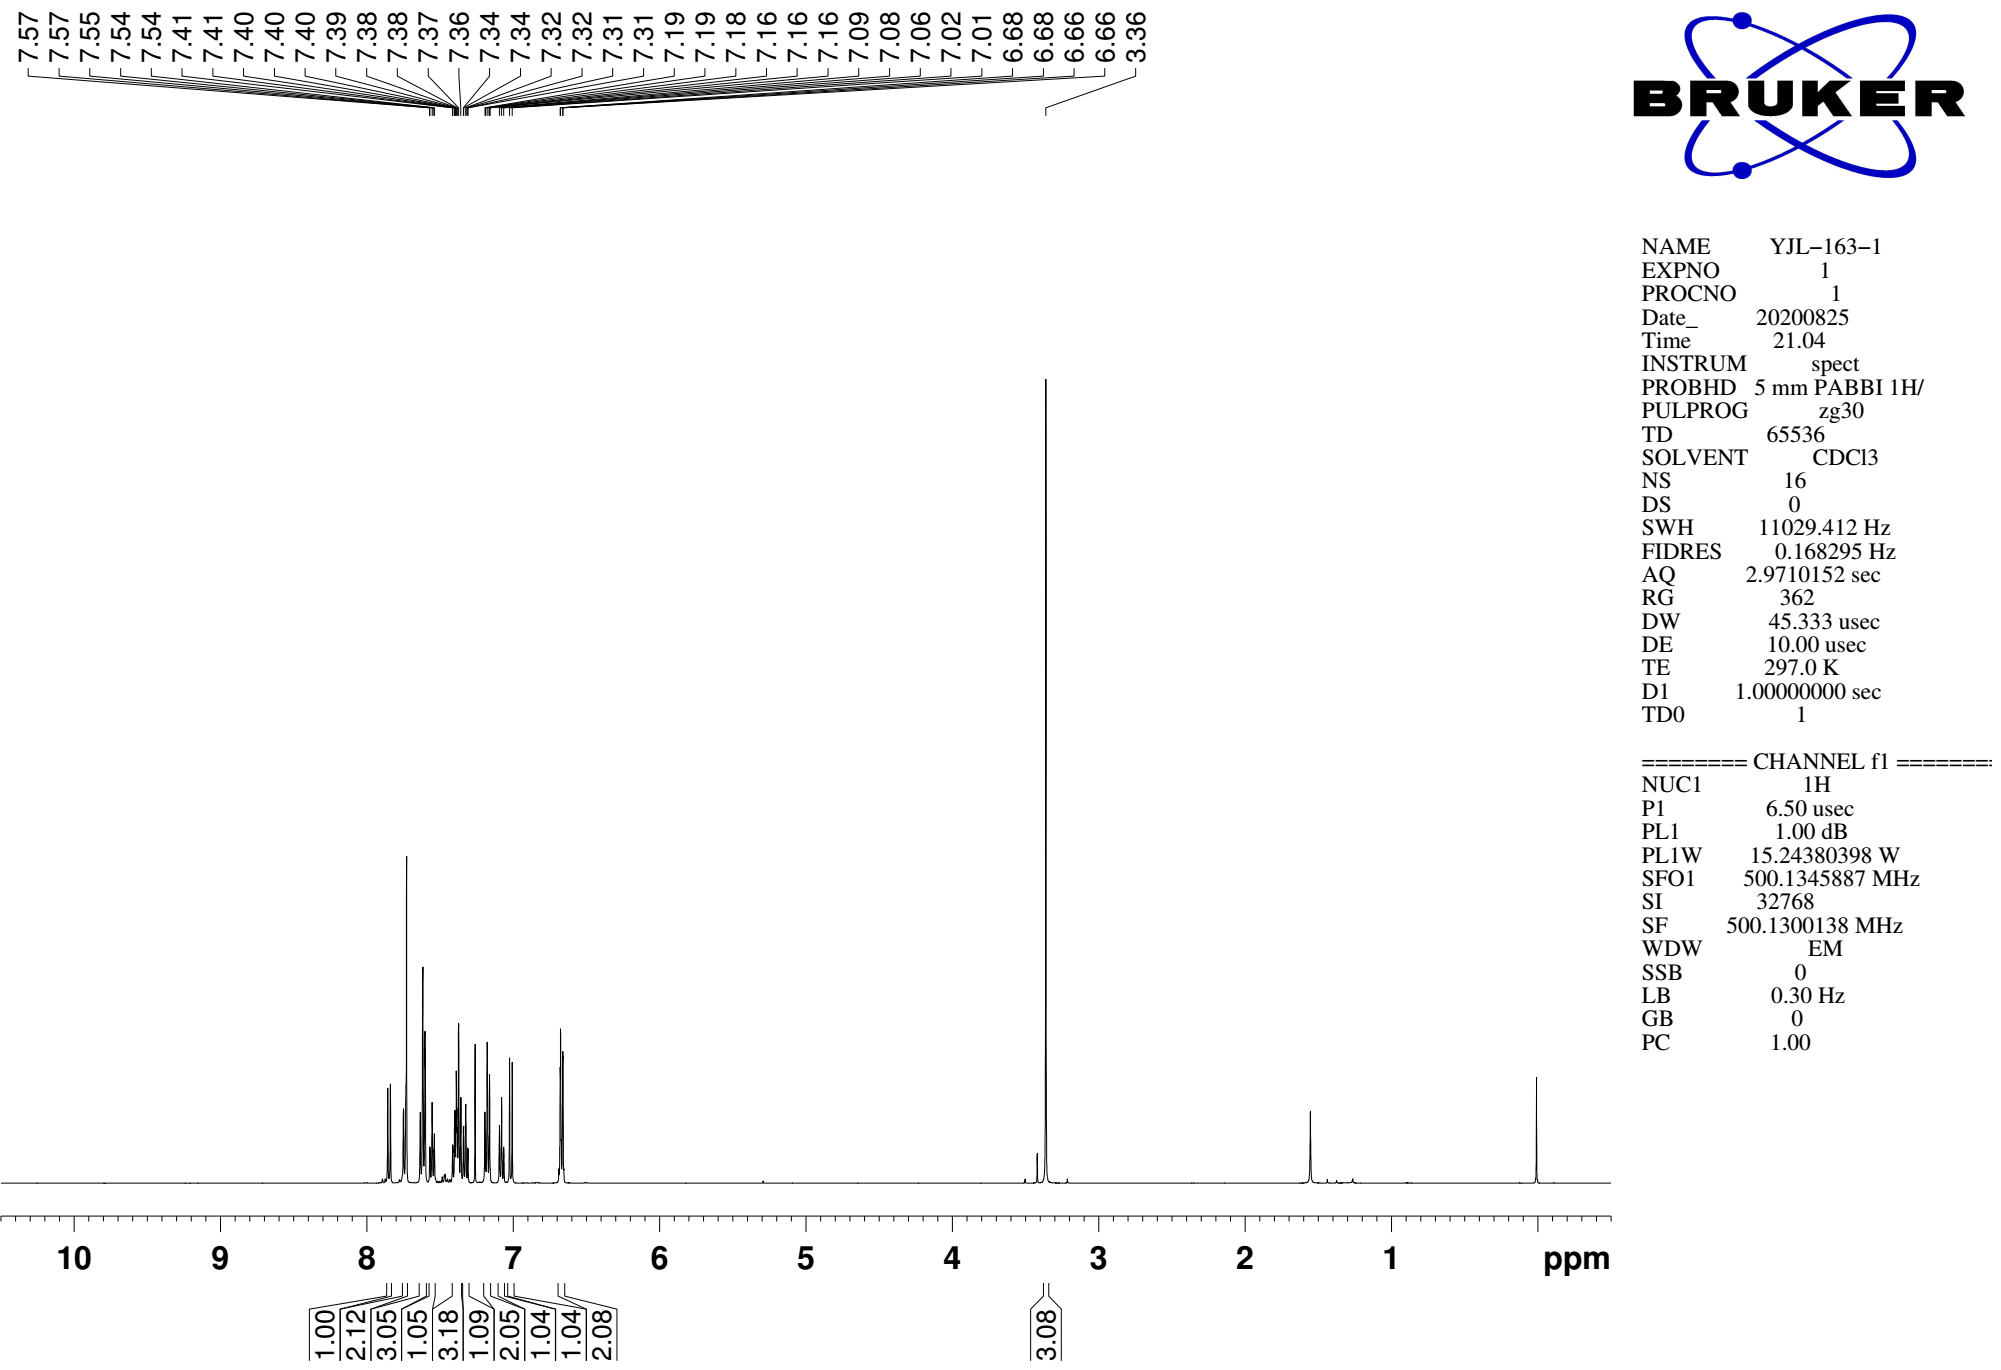


Supplementary Figure 37. 1H NMR (CDCl3, 500MHz) spectra of 5


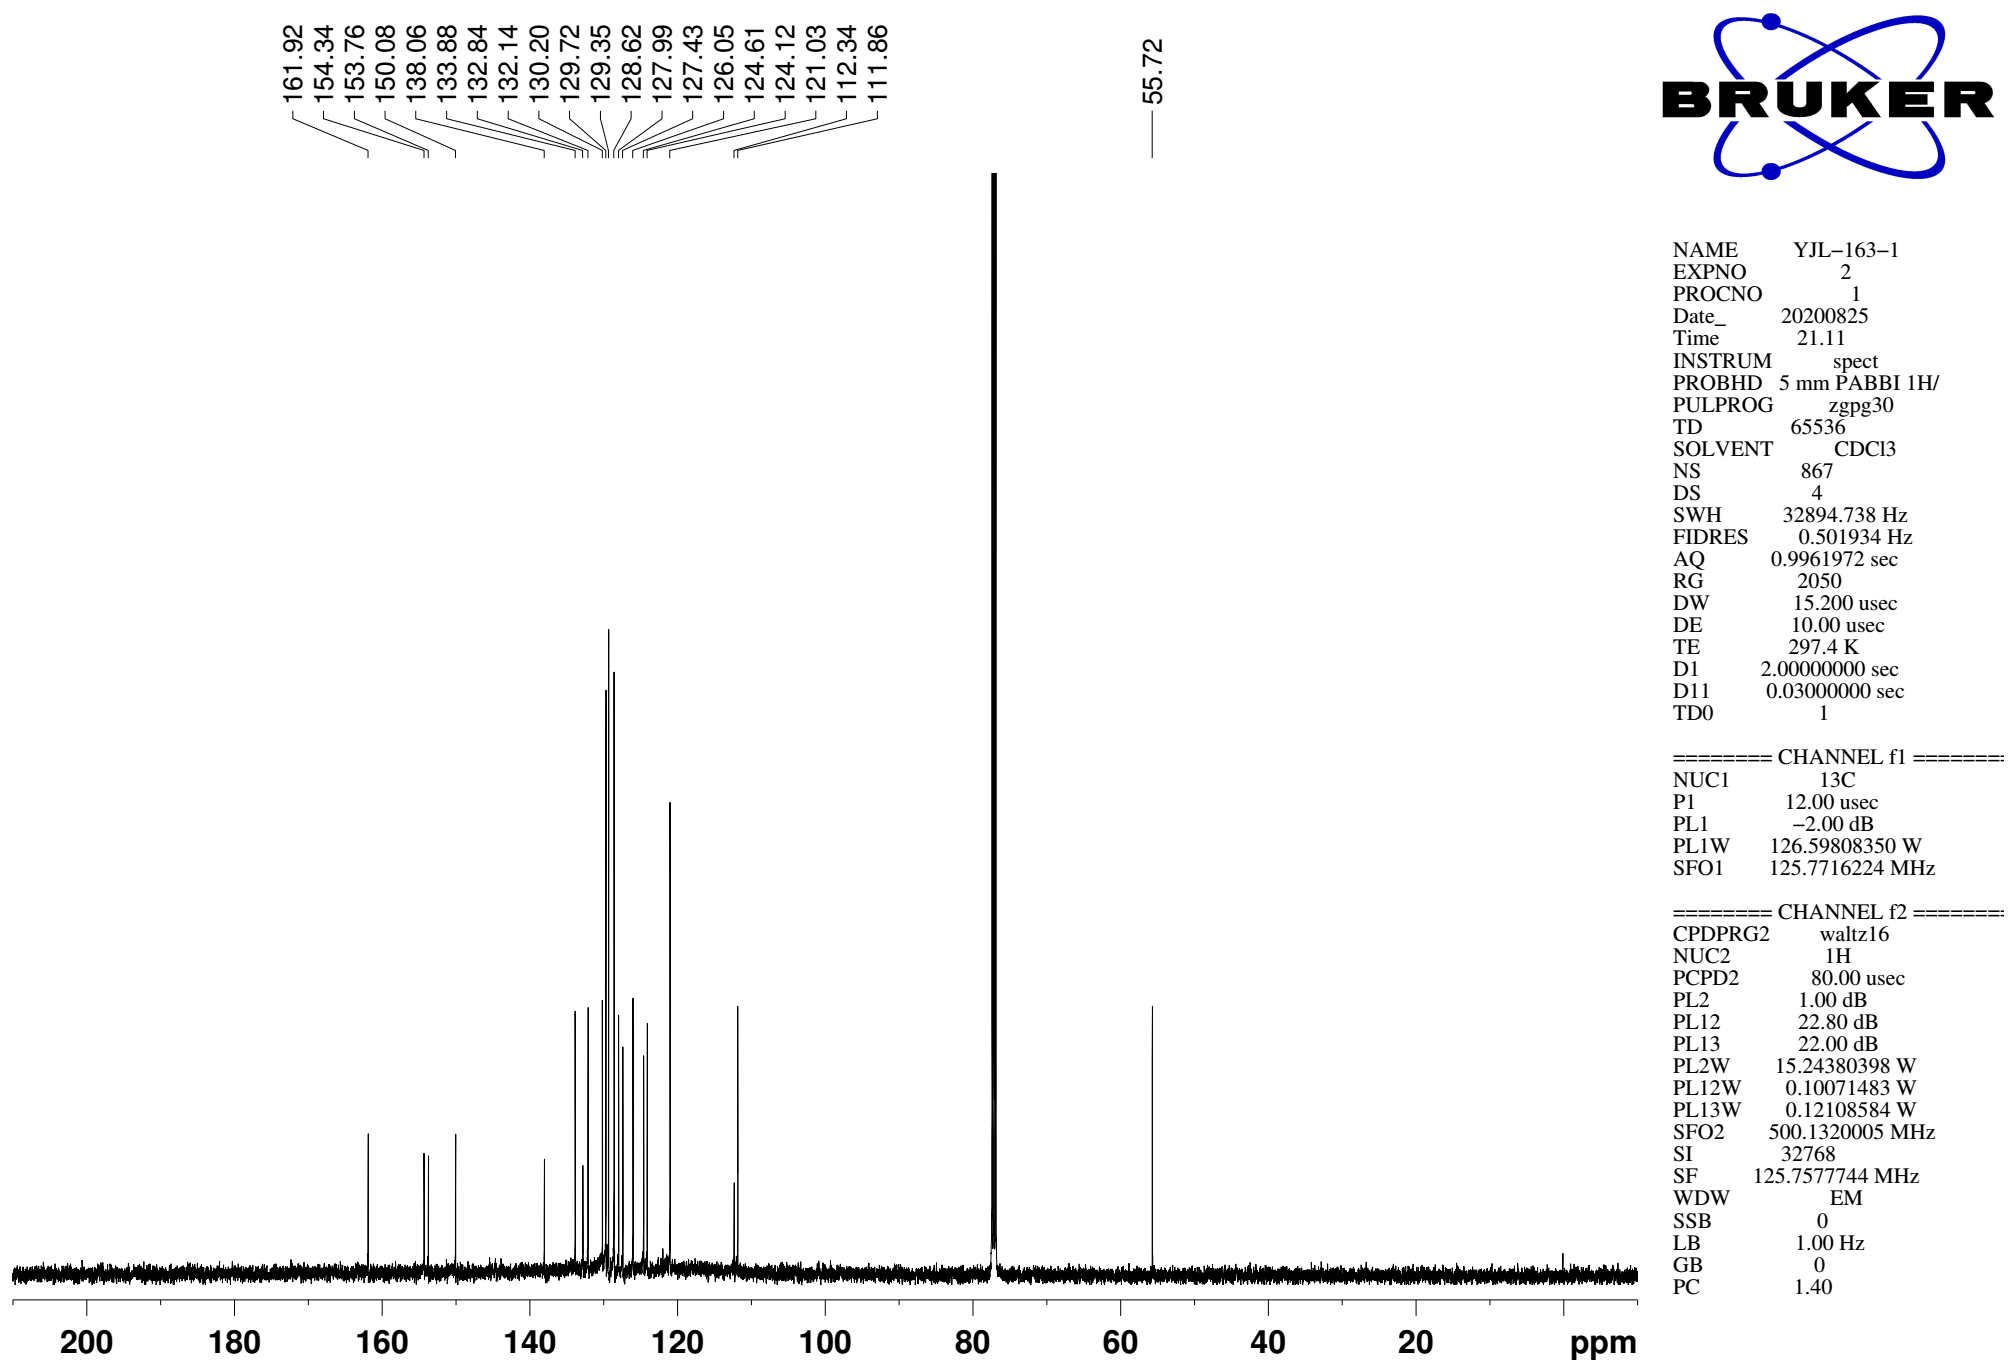


Supplementary Figure 38. 13C NMR (CDCl3, 126MHz) spectra of spectra of 5


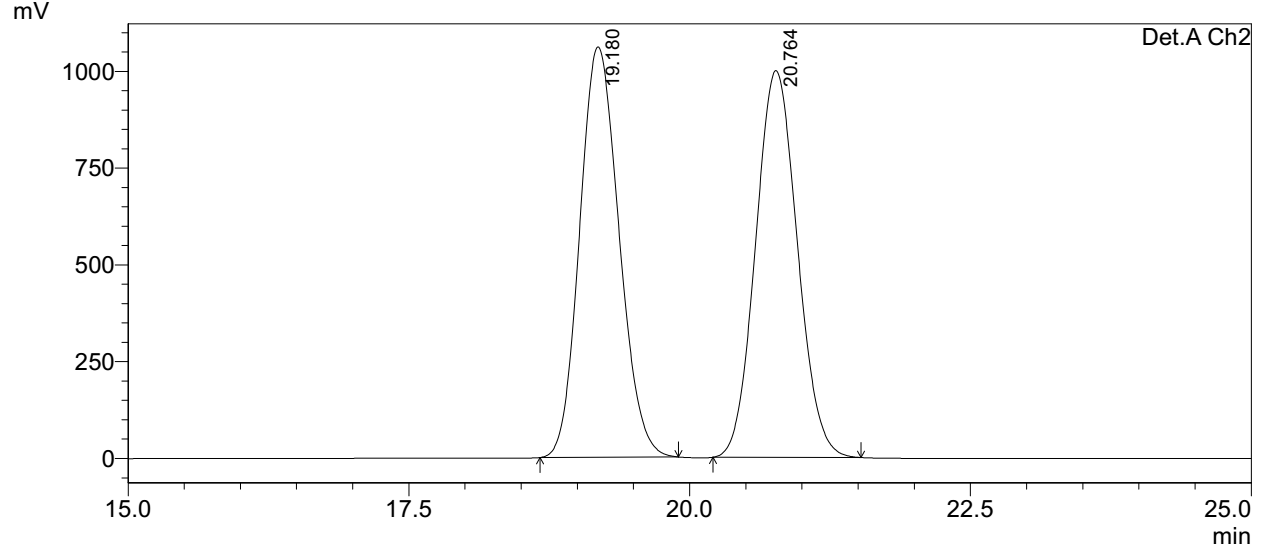


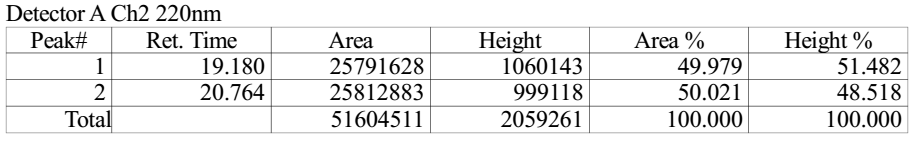


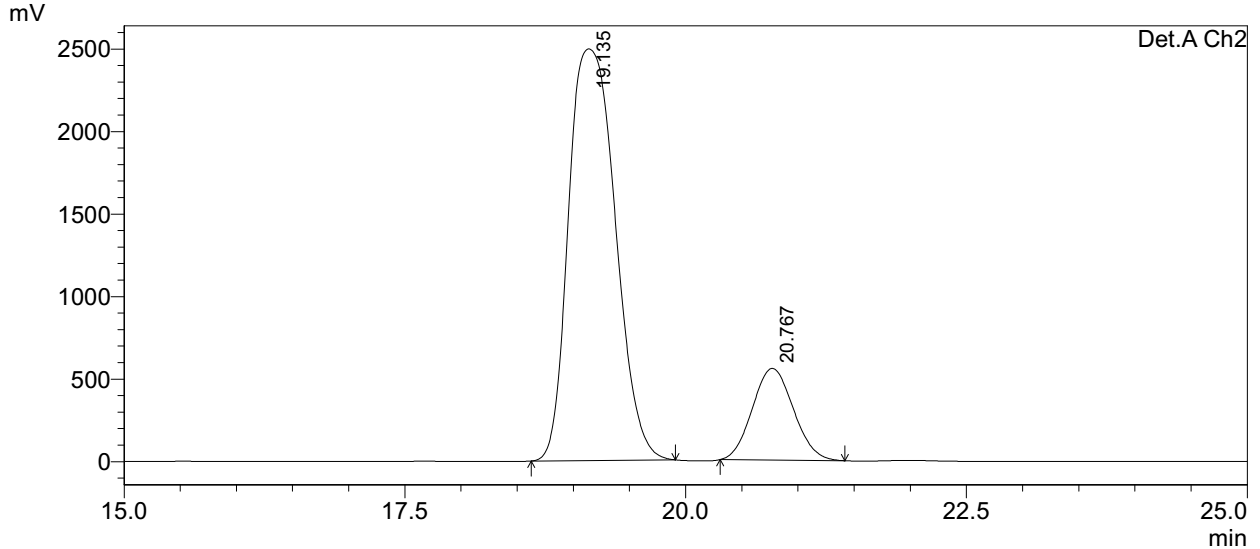


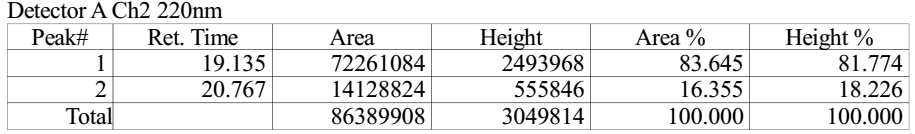


Supplementary Figure 39. HPLC spectra of 5


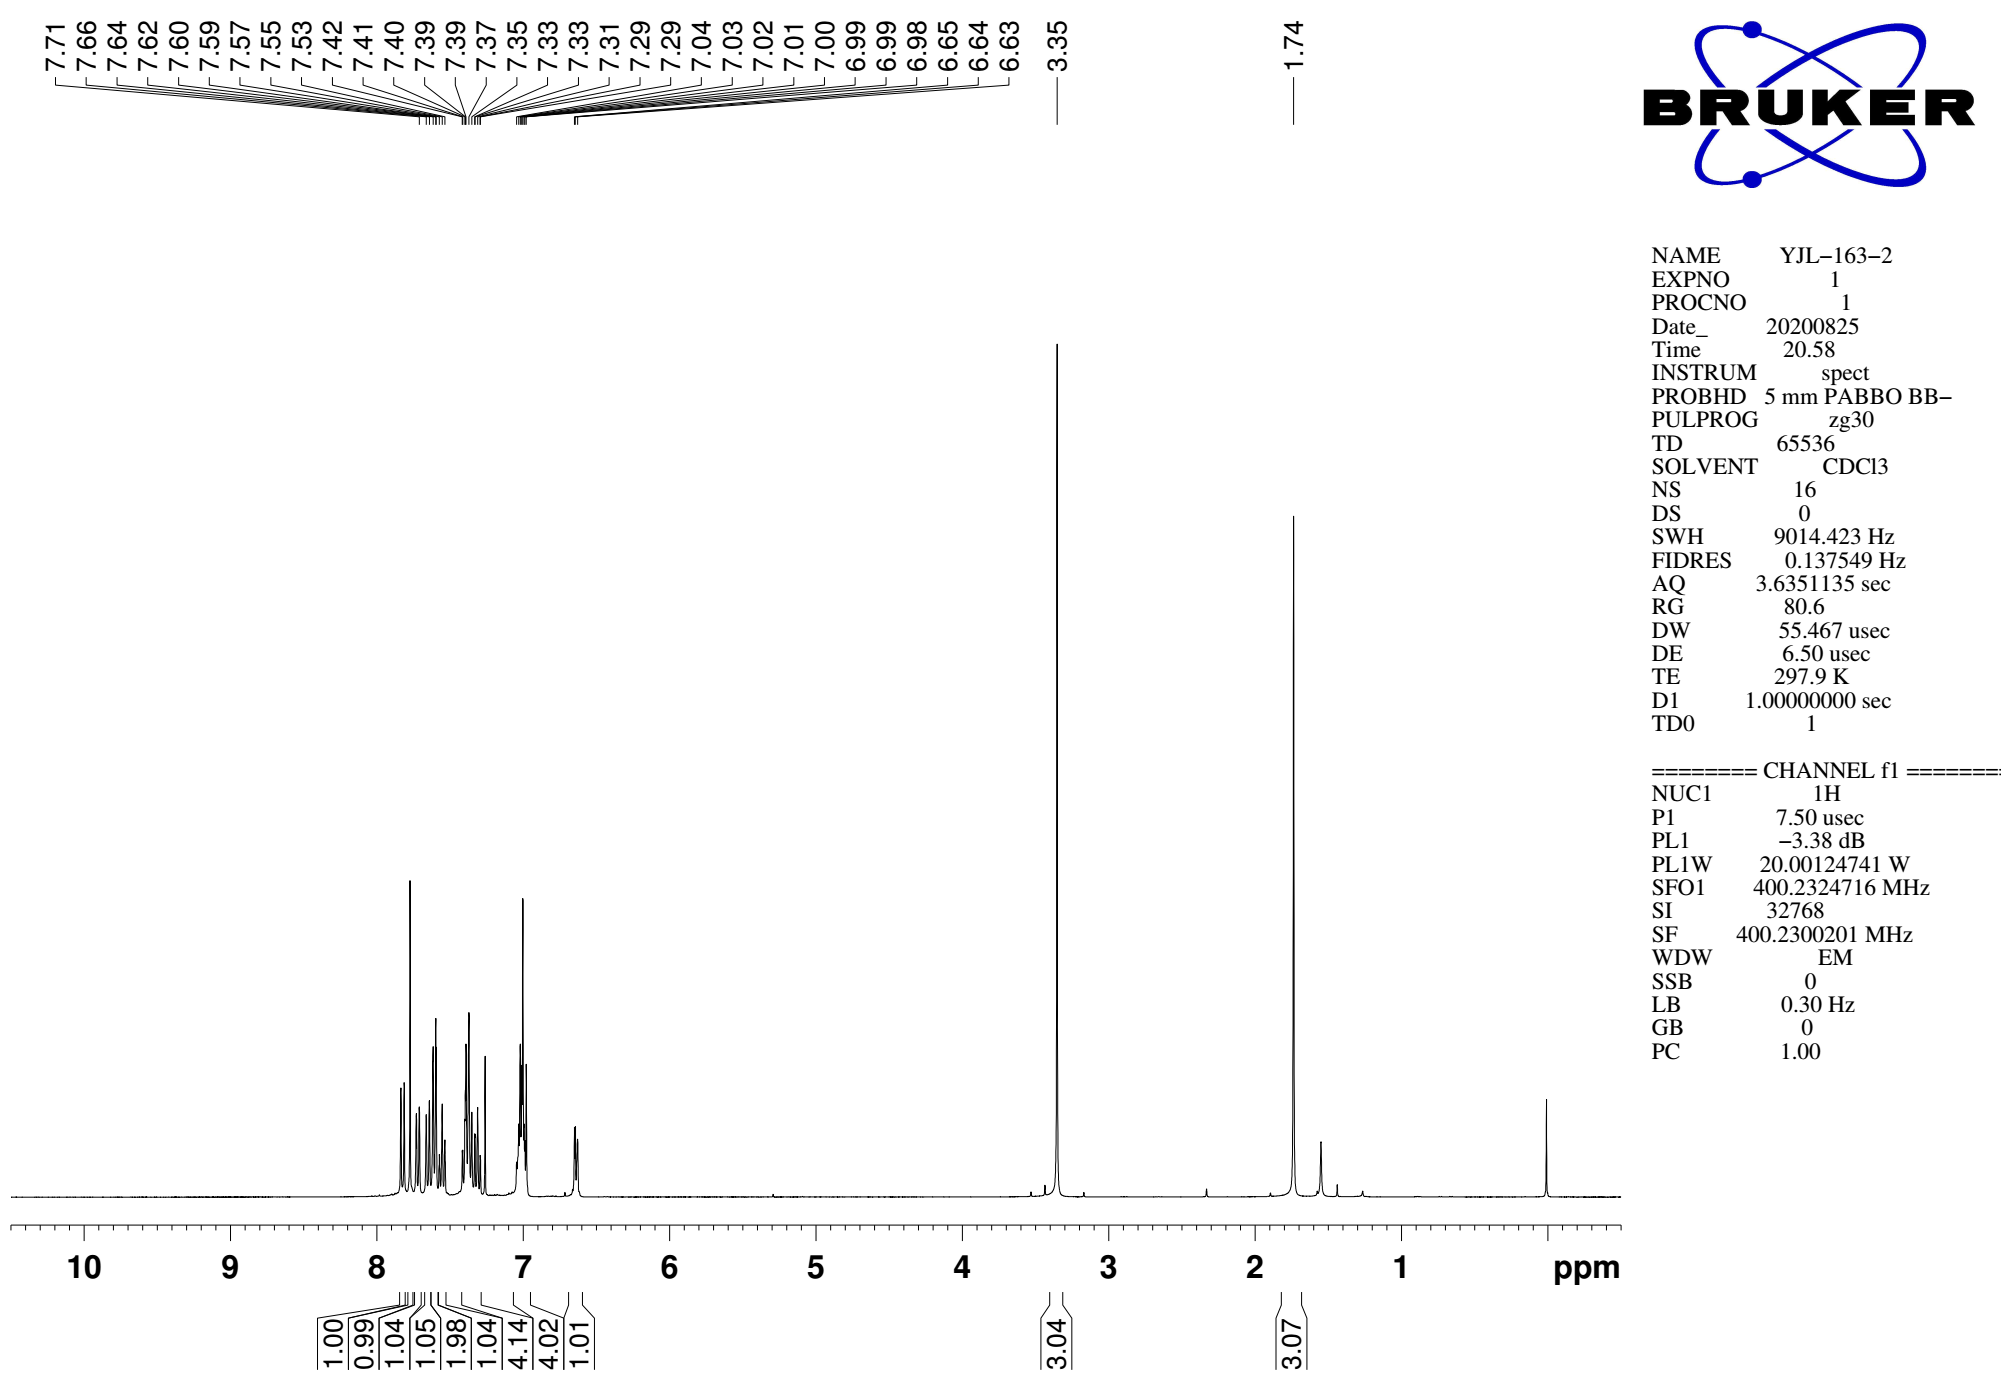


Supplementary Figure 40. 1H NMR (CDCl3, 400MHz) spectra of 6


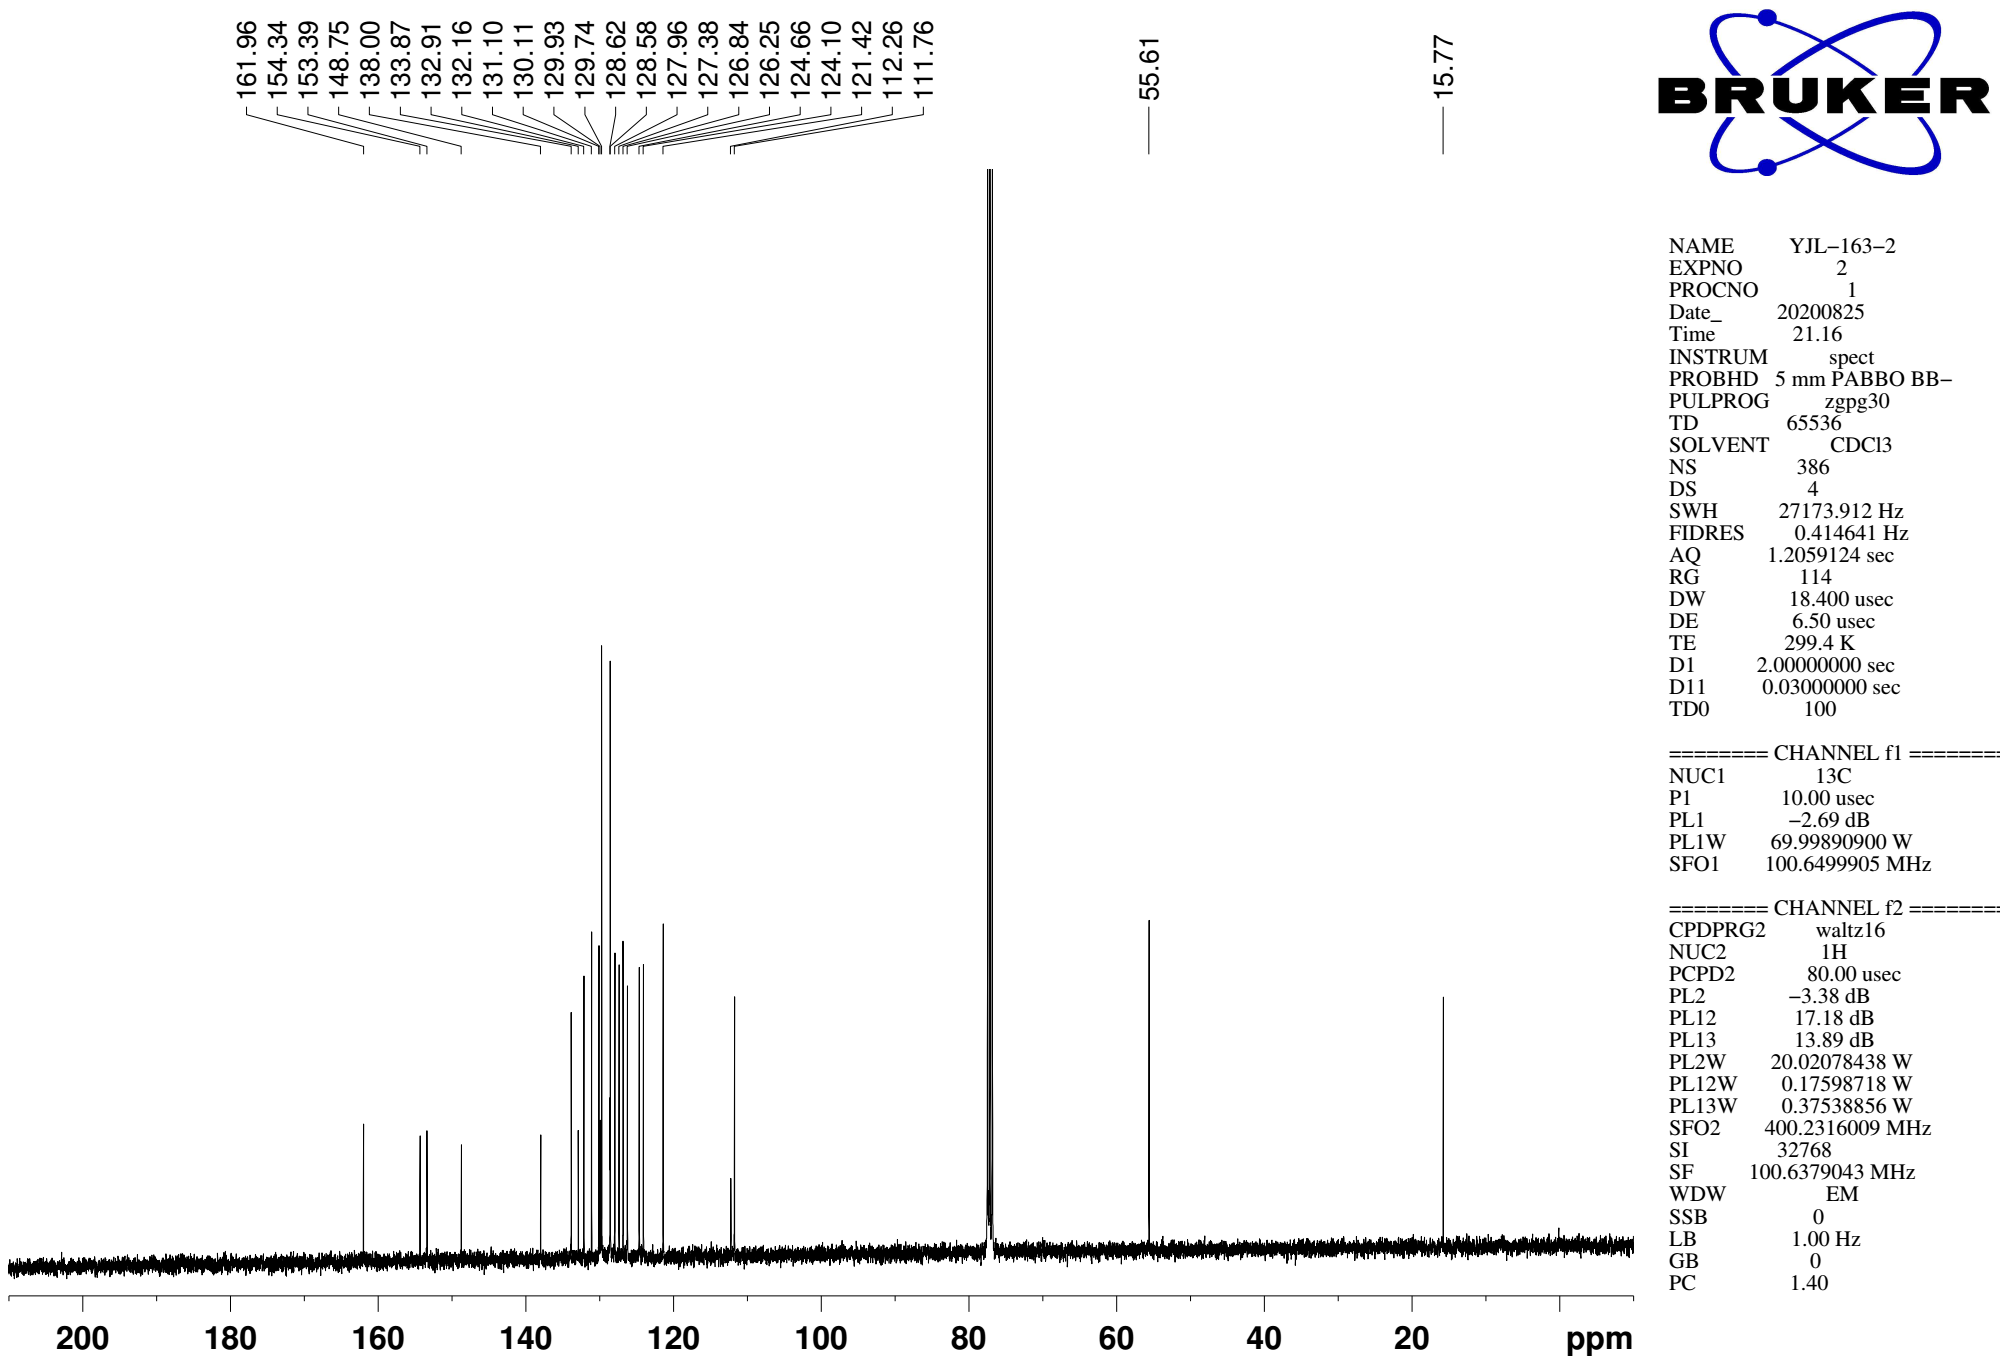


Supplementary Figure 41. 13C NMR (CDCl3, 101MHz) spectra of spectra of 6


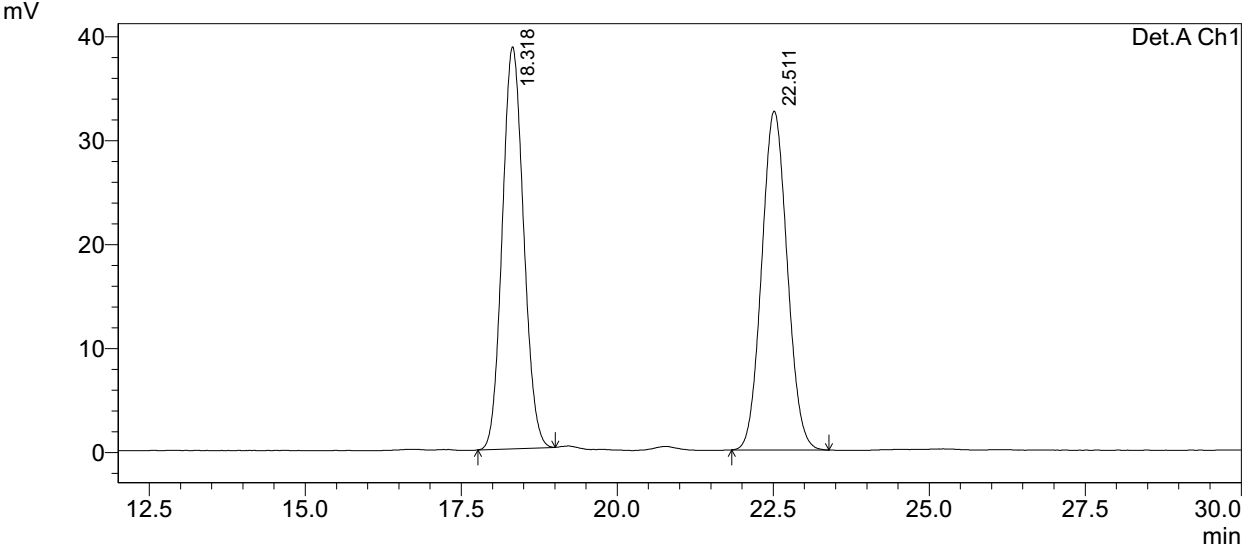


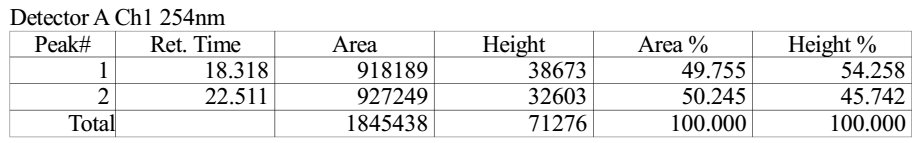


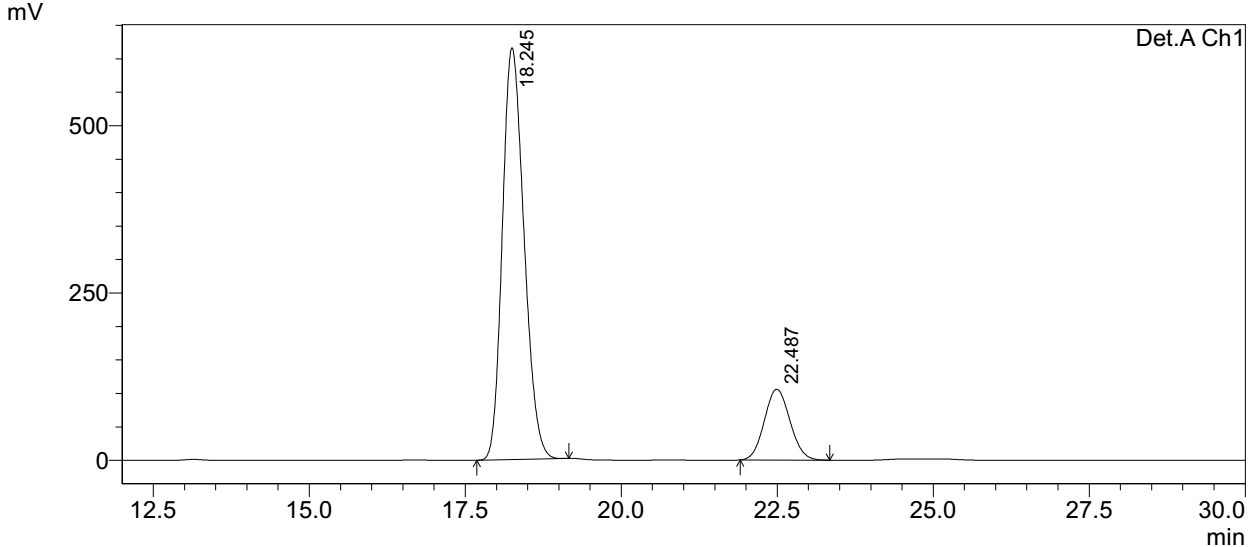


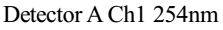


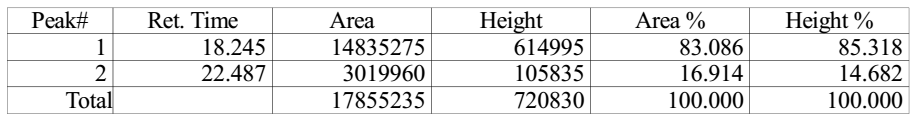


Supplementary Figure 42. HPLC spectra of 6


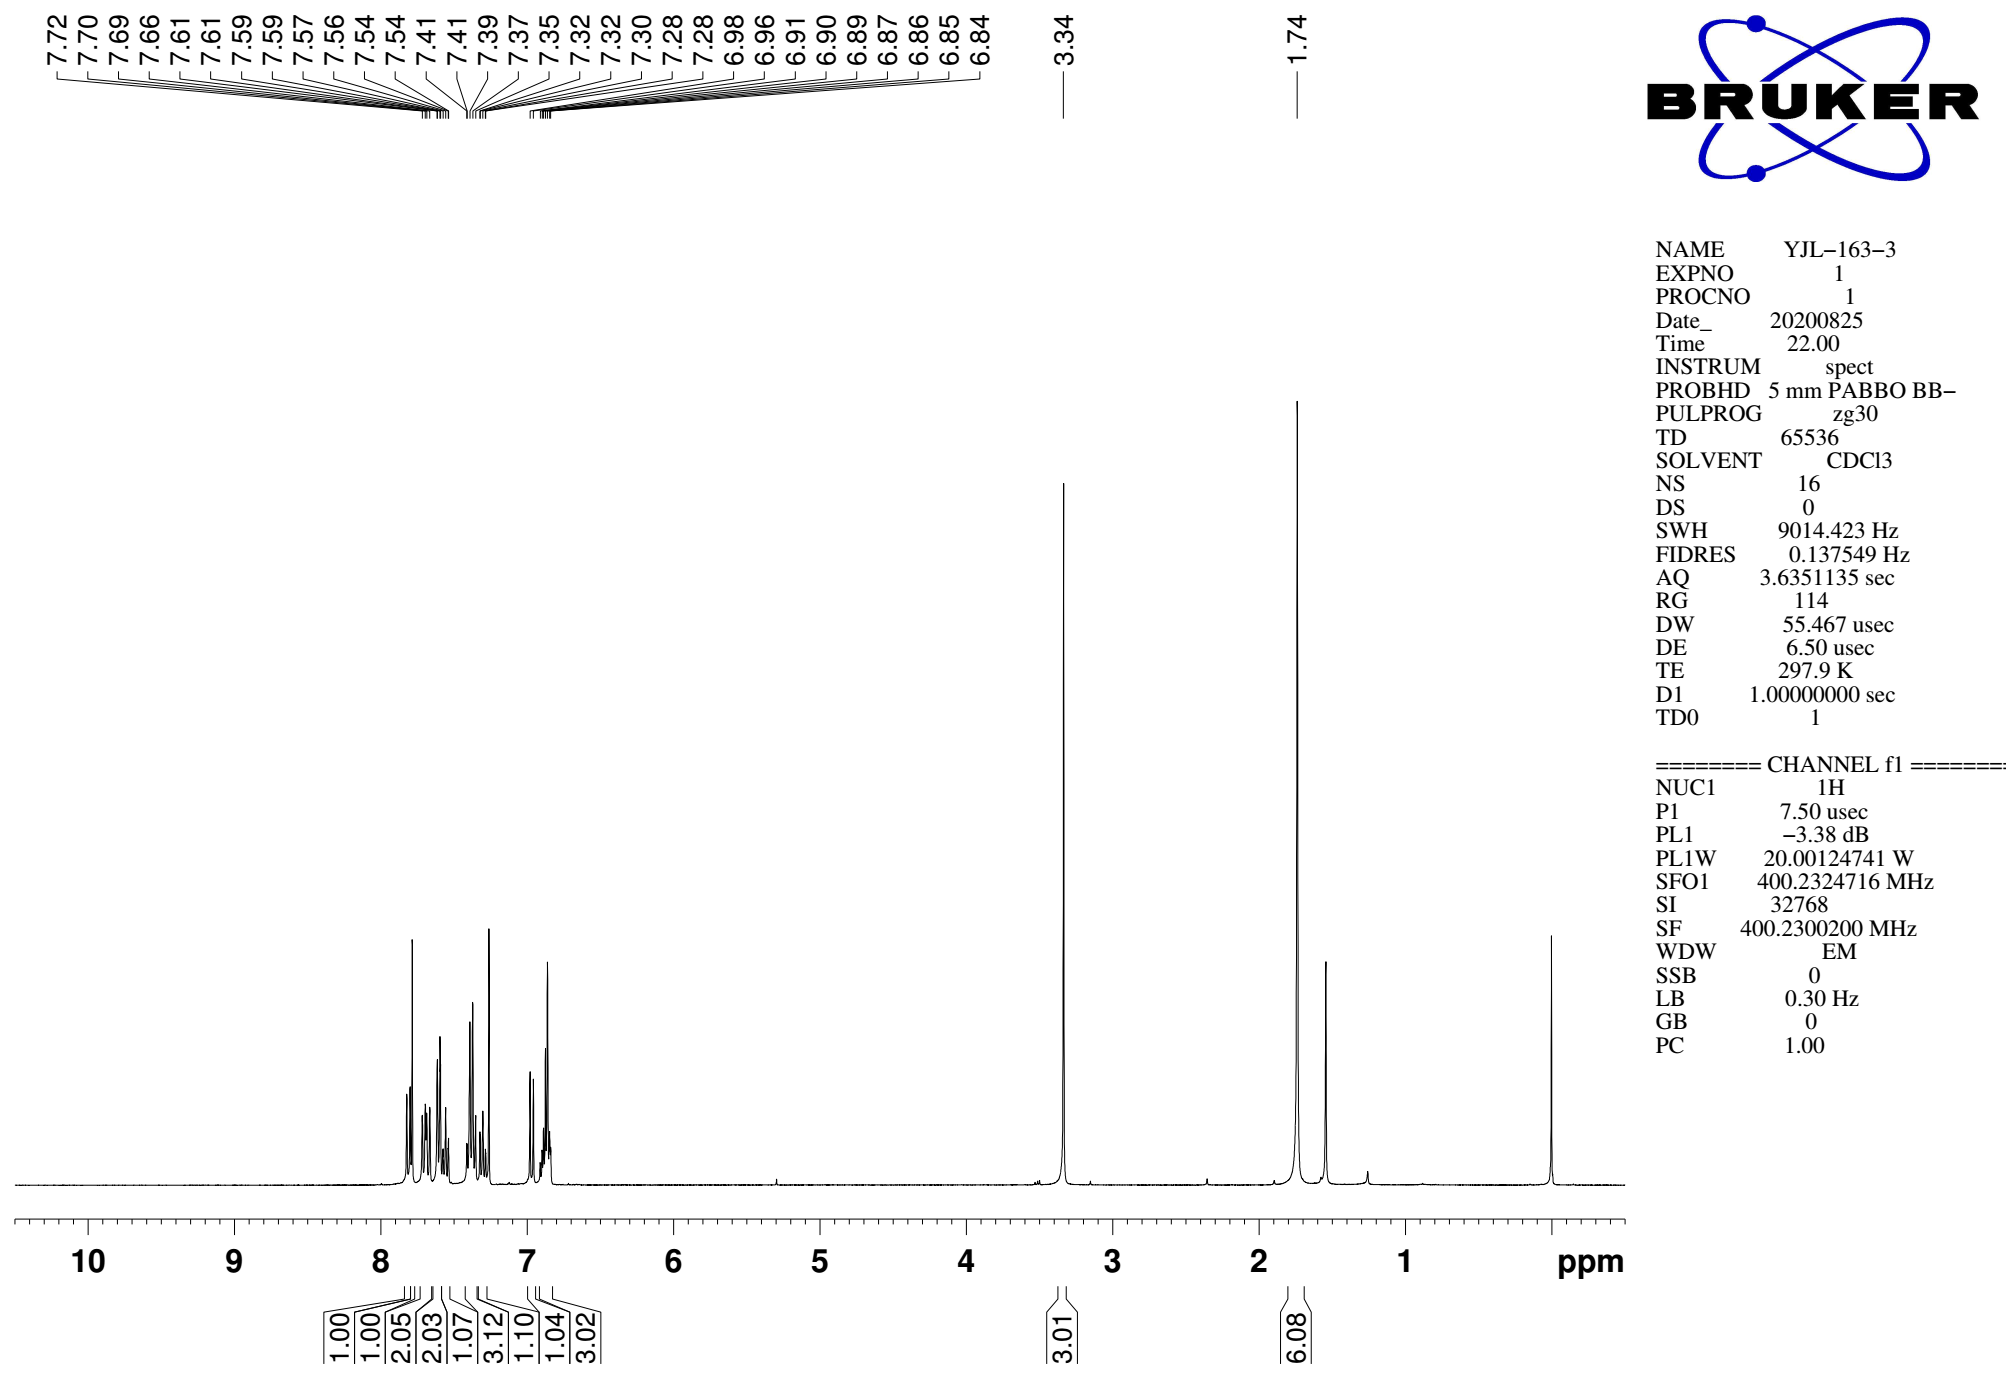


Supplementary Figure 43. 1H NMR (CDCl3, 400MHz) spectra of 7


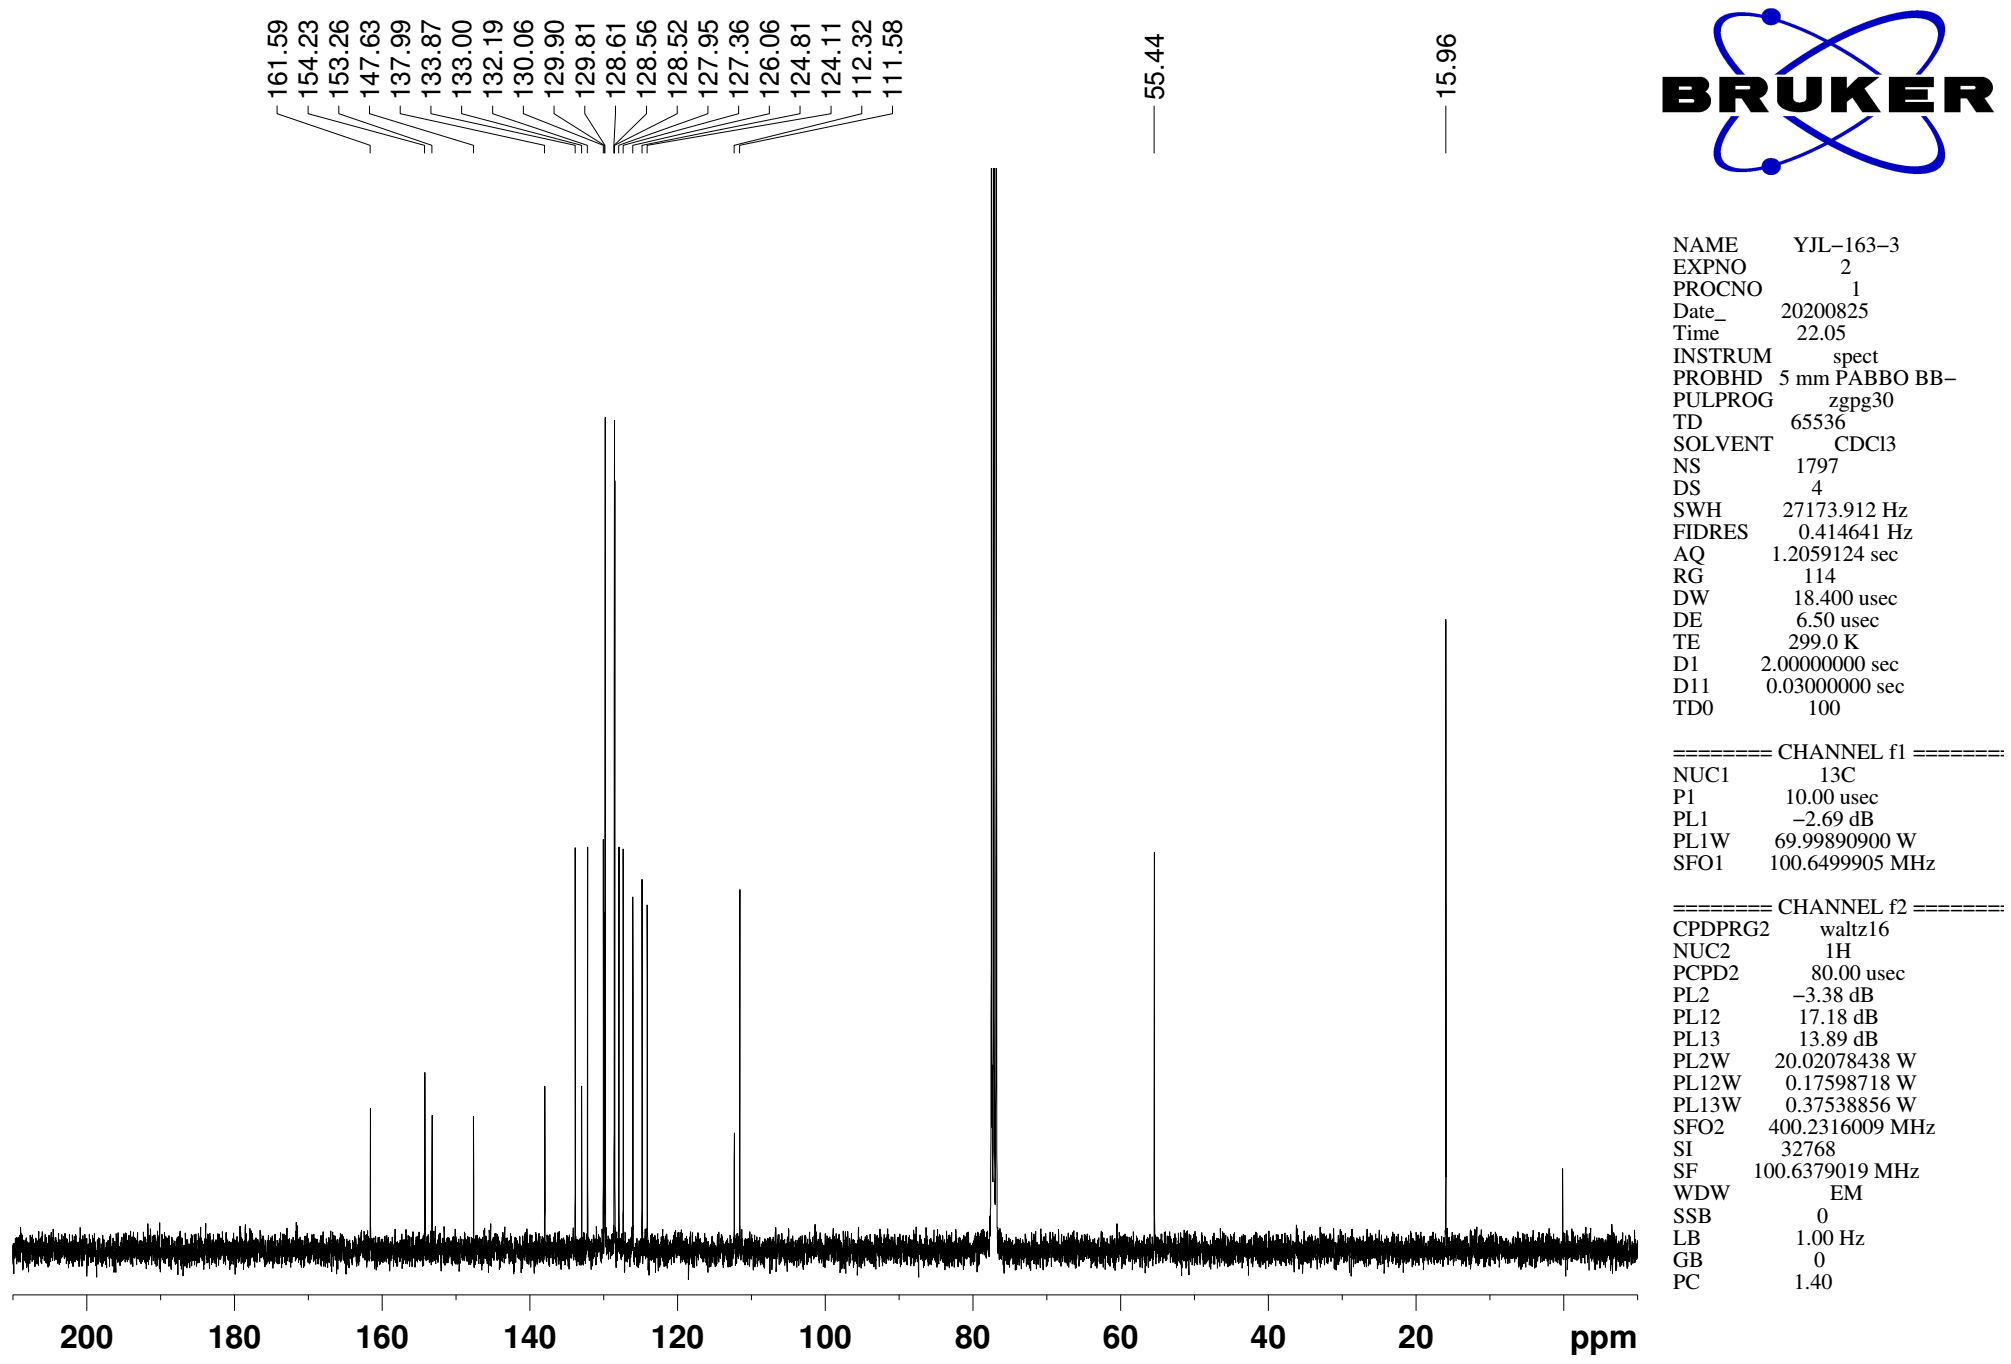


Supplementary Figure 44. 13C NMR (CDCl3, 101MHz) spectra of spectra of 7


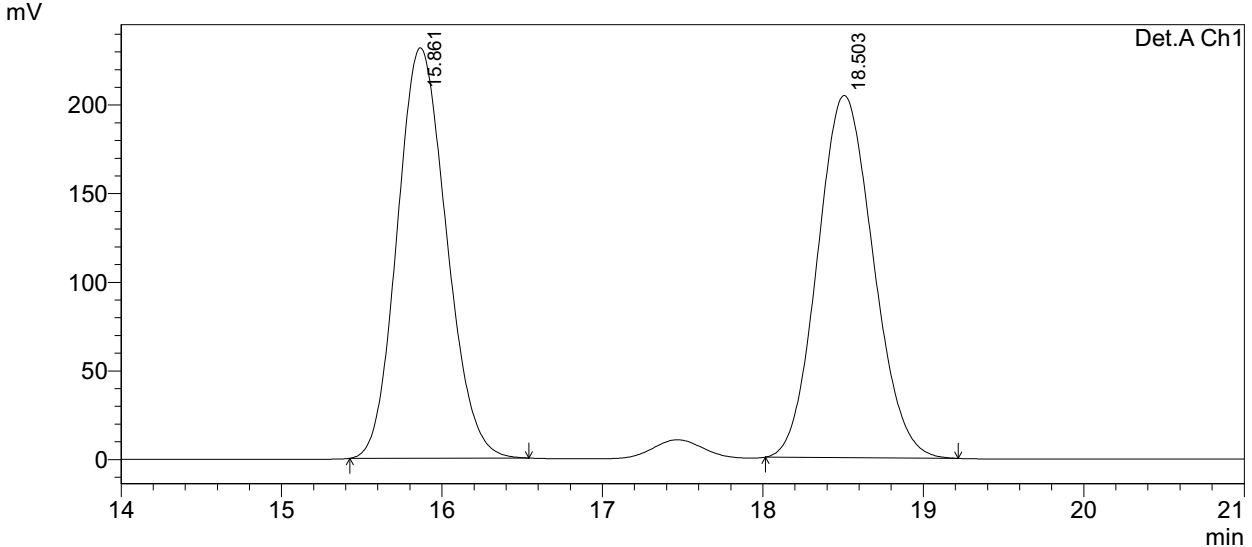


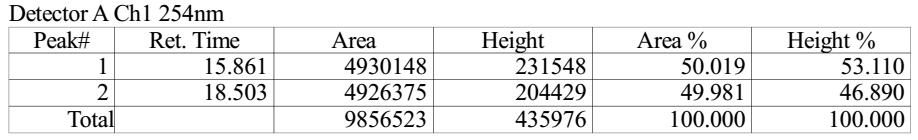


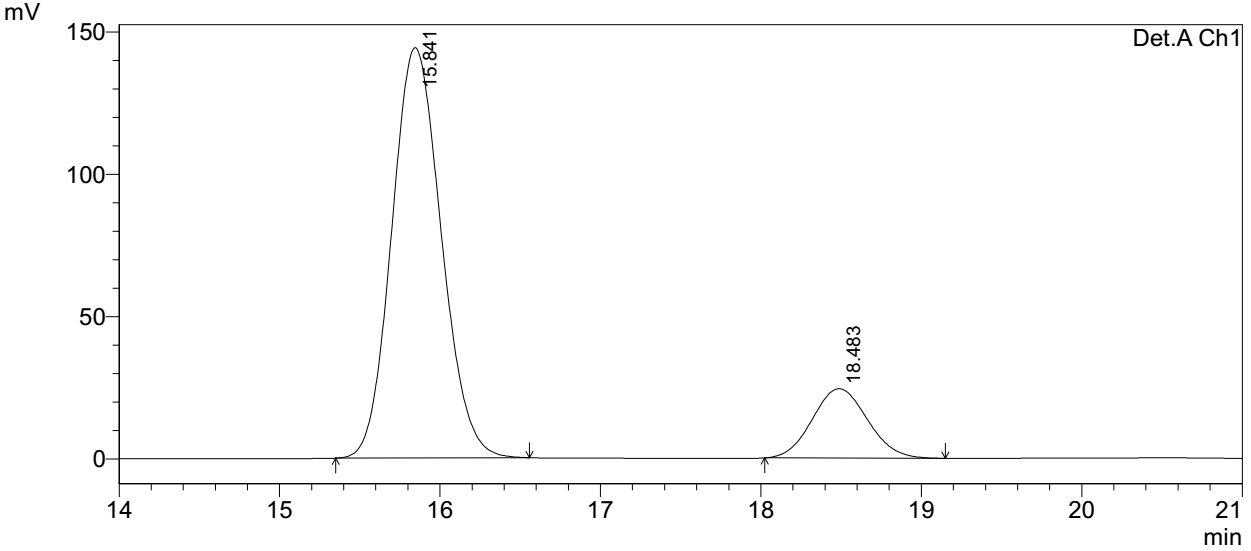


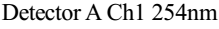


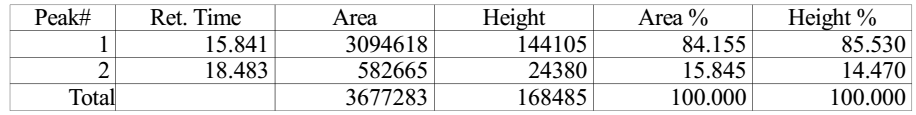


Supplementary Figure 45. HPLC spectra of 7


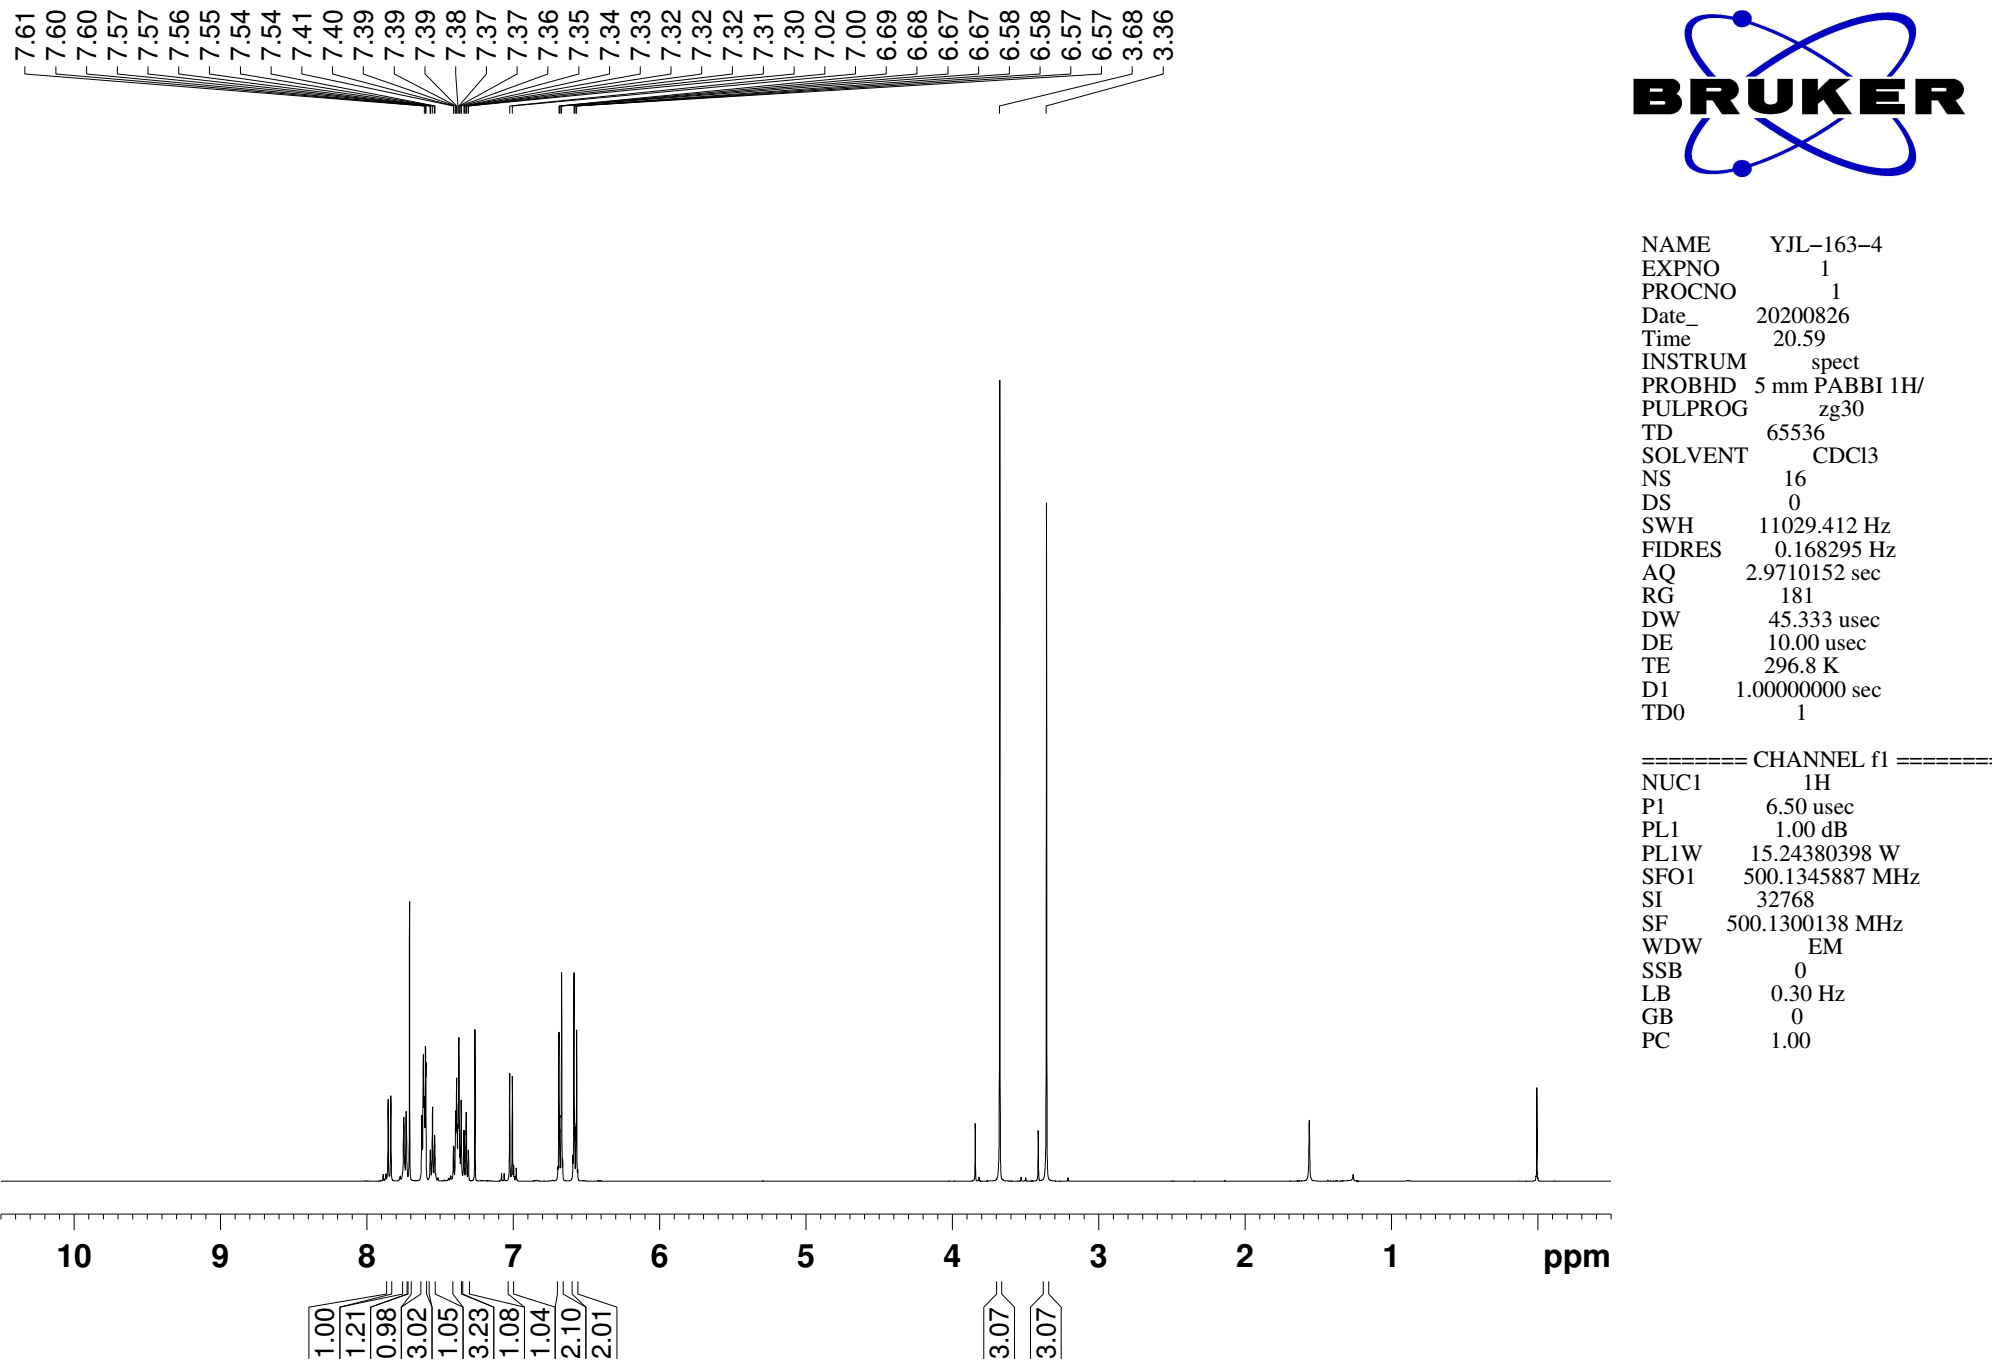


Supplementary Figure 46. 1H NMR (CDCl3, 500MHz) spectra of 8


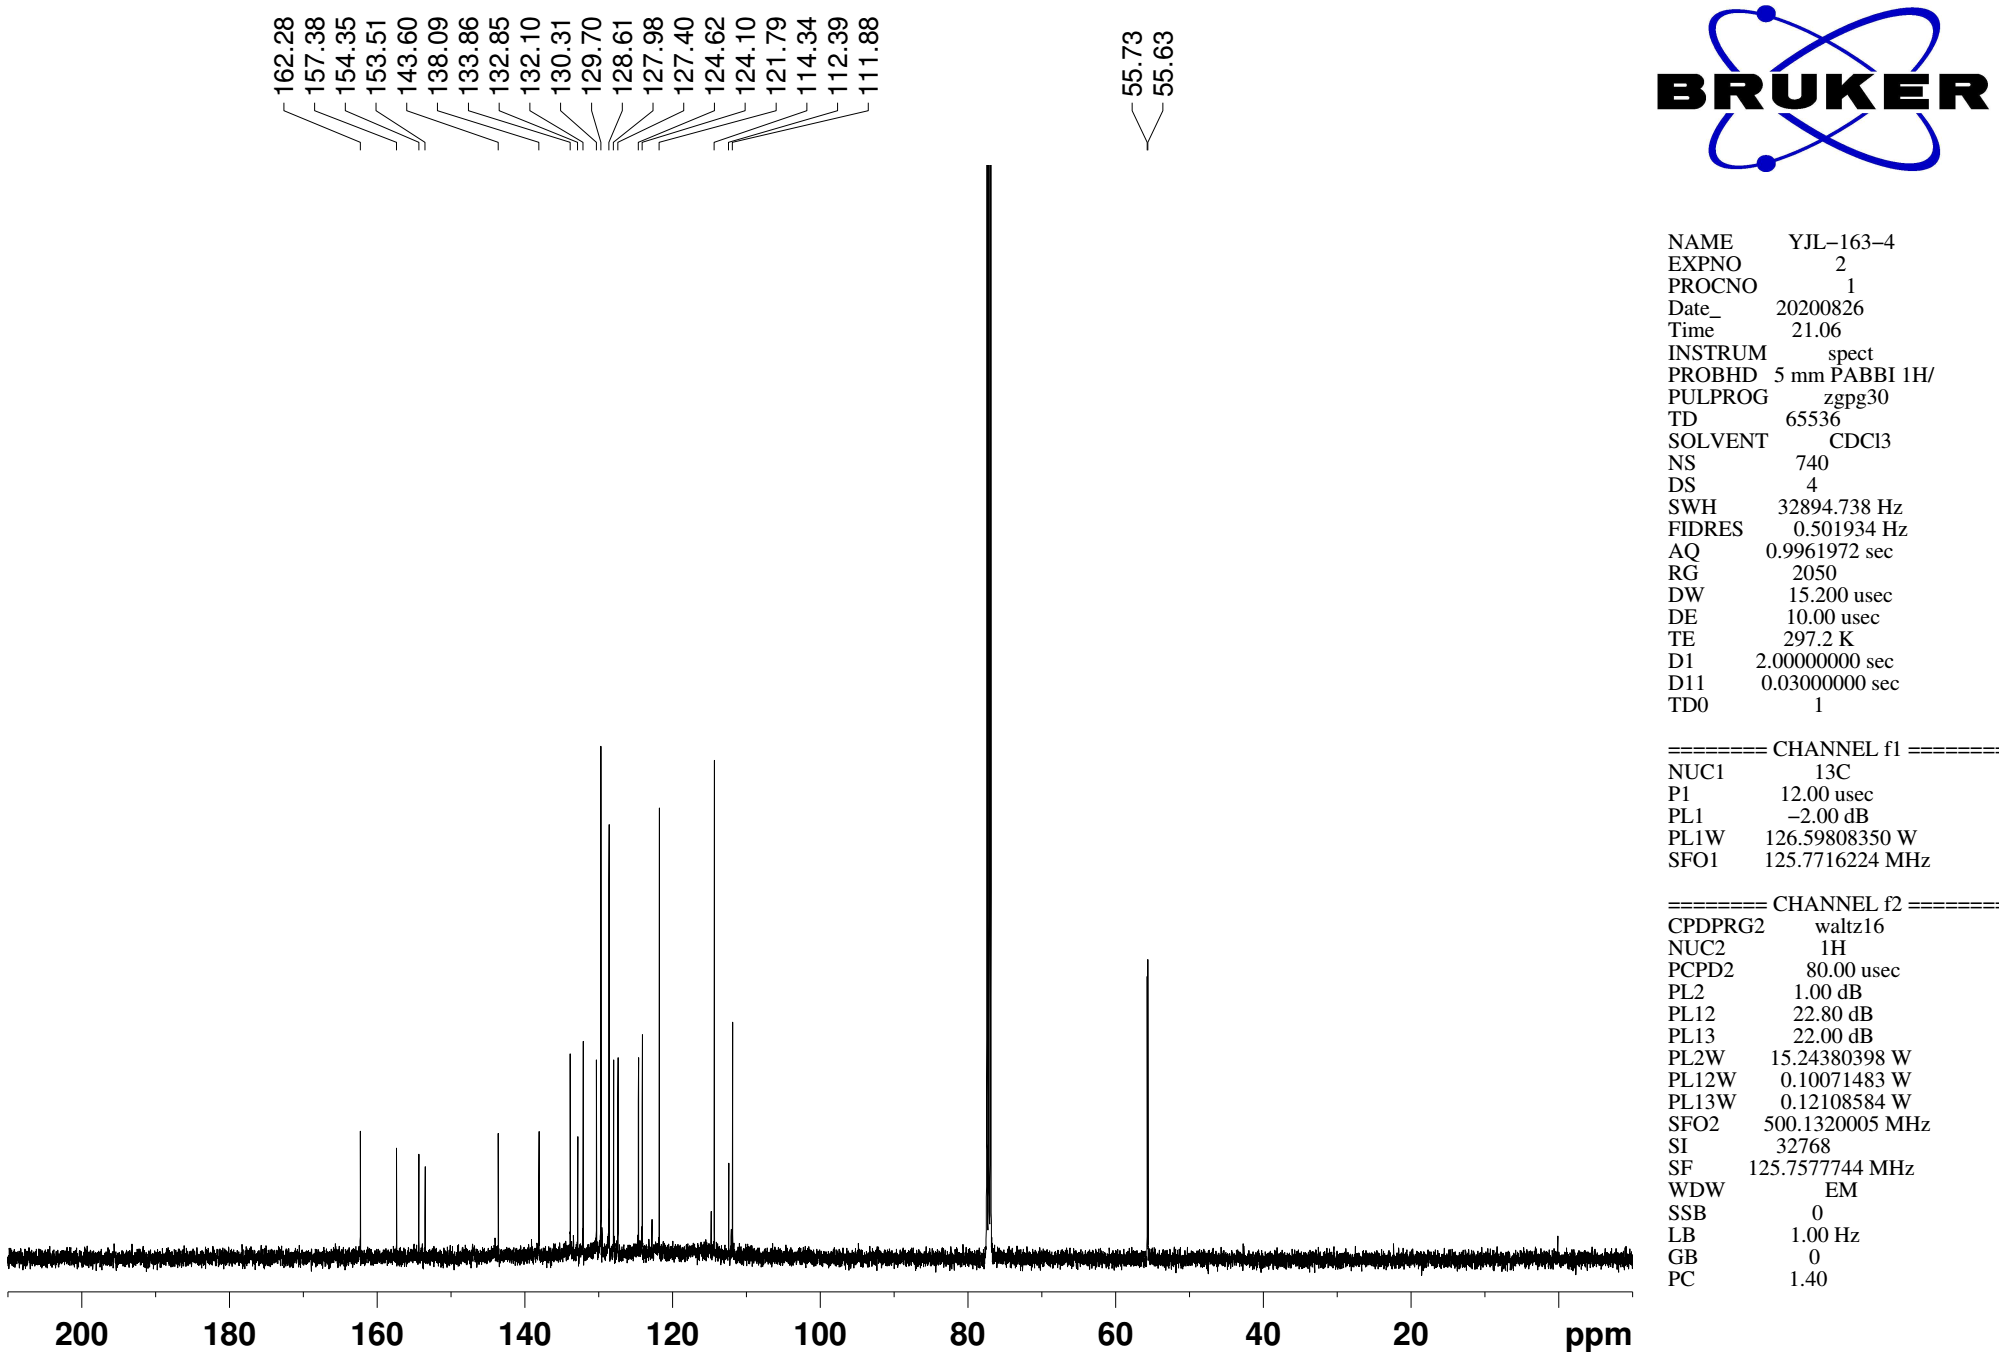


Supplementary Figure 47. 13C NMR (CDCl3, 126MHz) spectra of spectra of 8


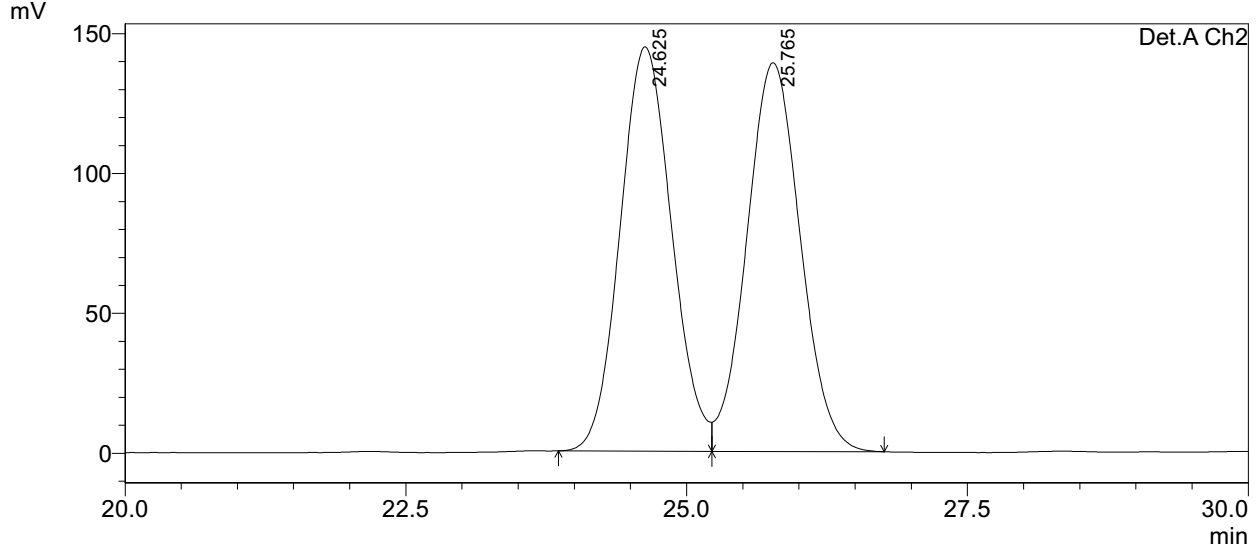


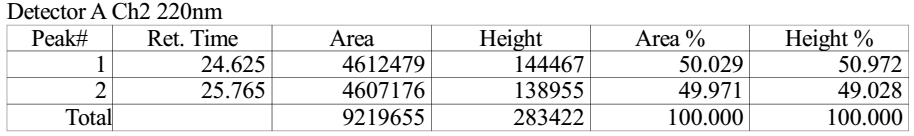


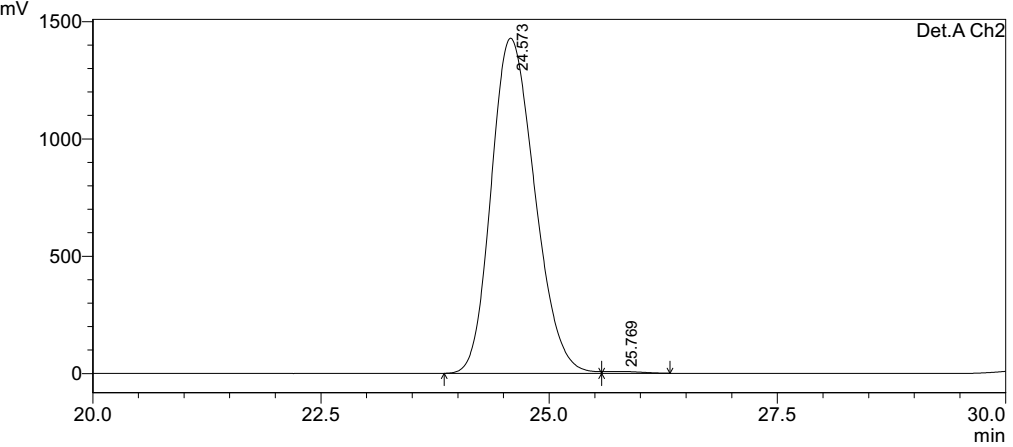


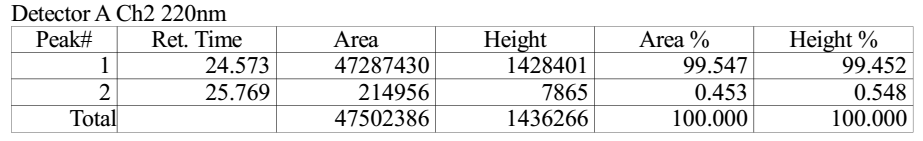


Supplementary Figure 48. HPLC spectra of 8


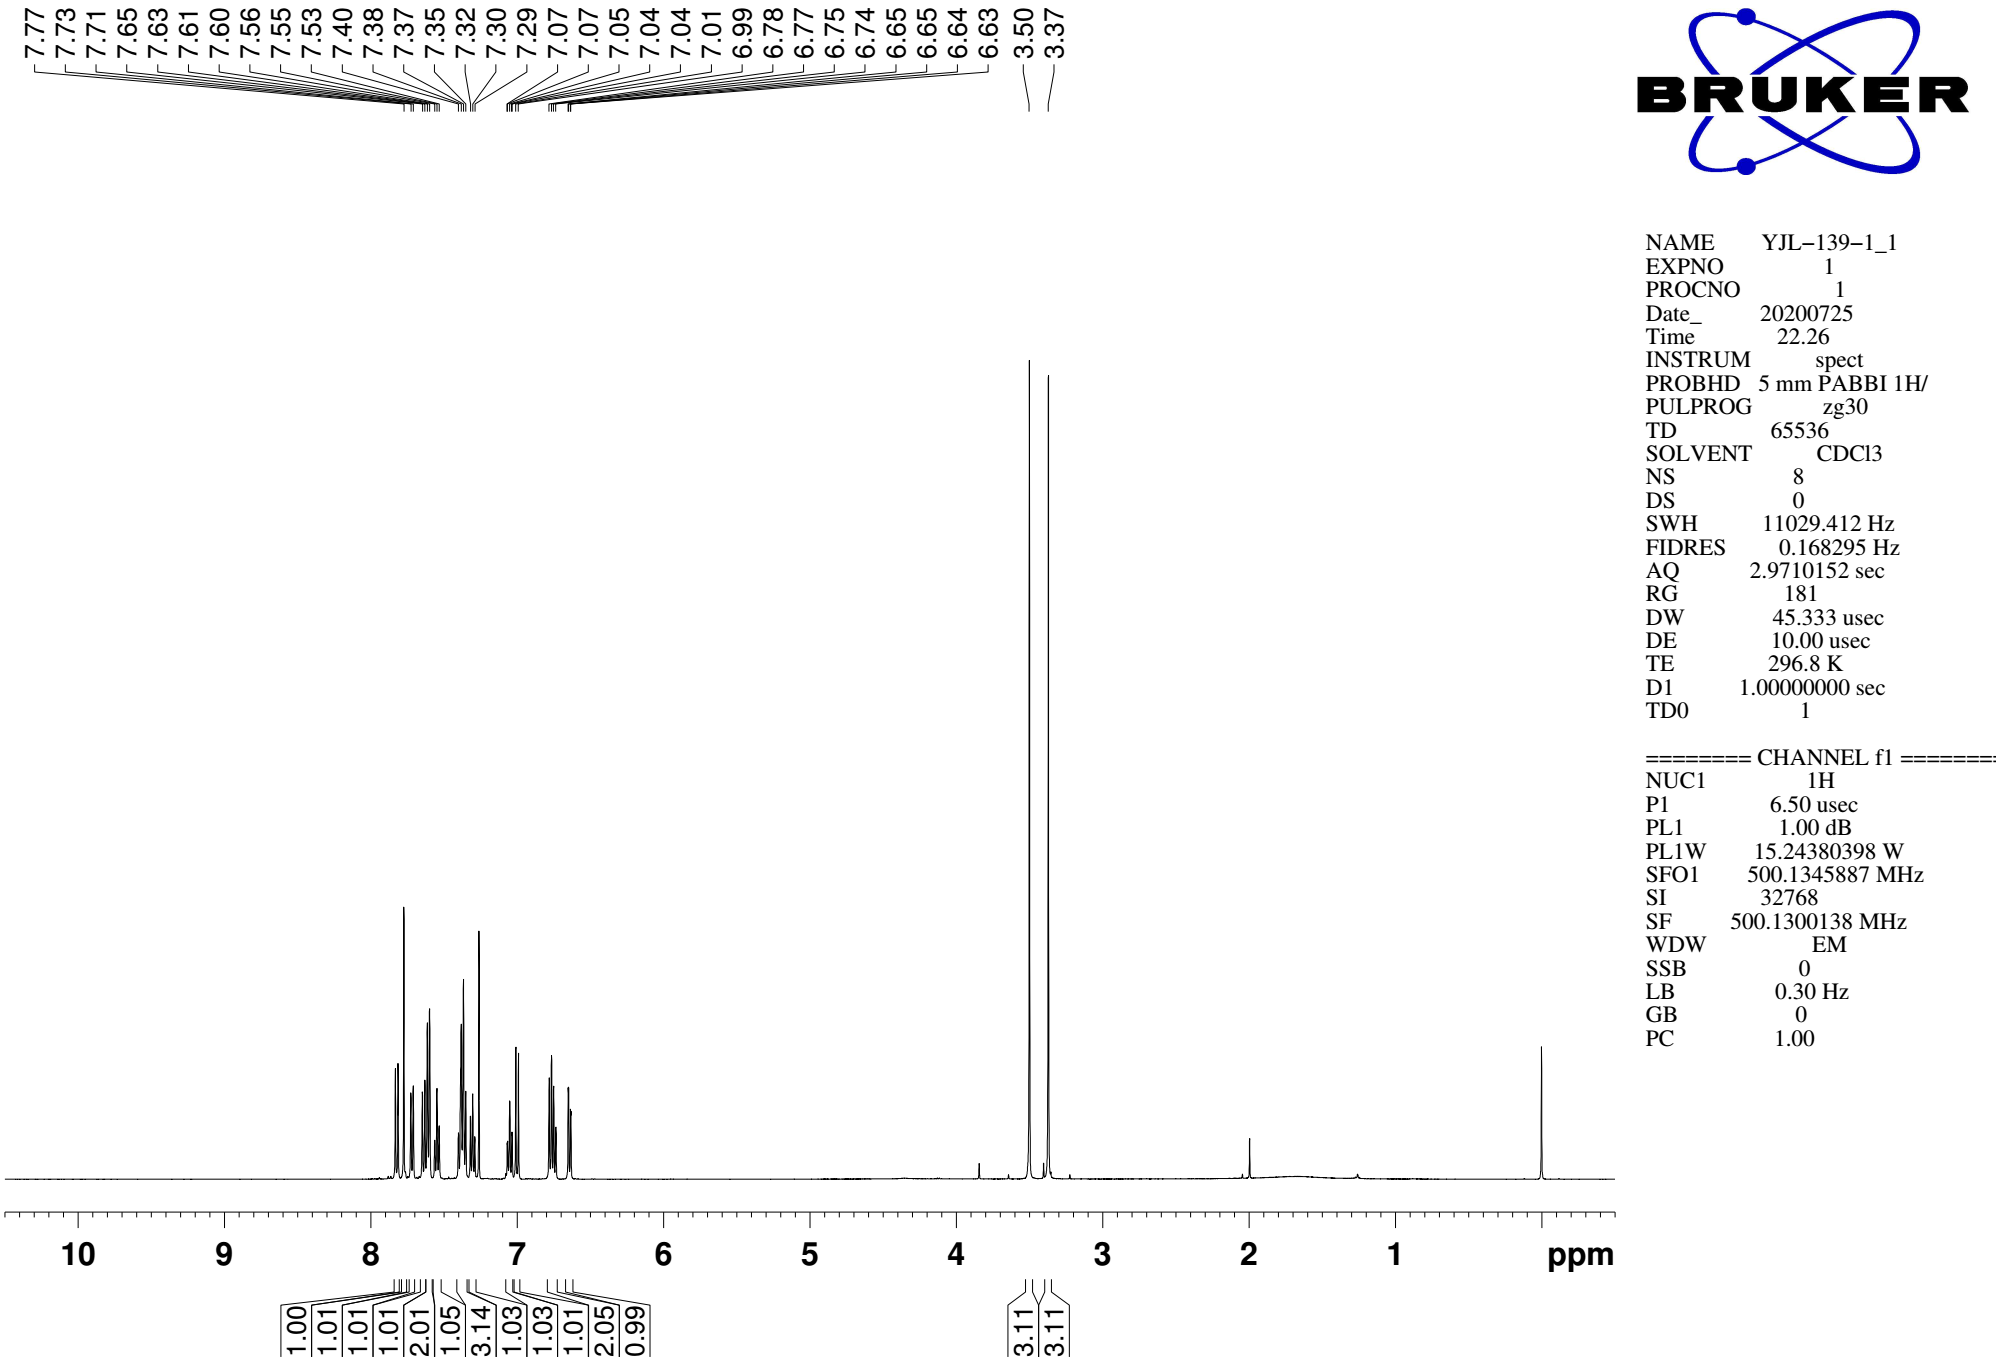


Supplementary Figure 49. 1H NMR (CDCl3, 500MHz) spectra of 9a


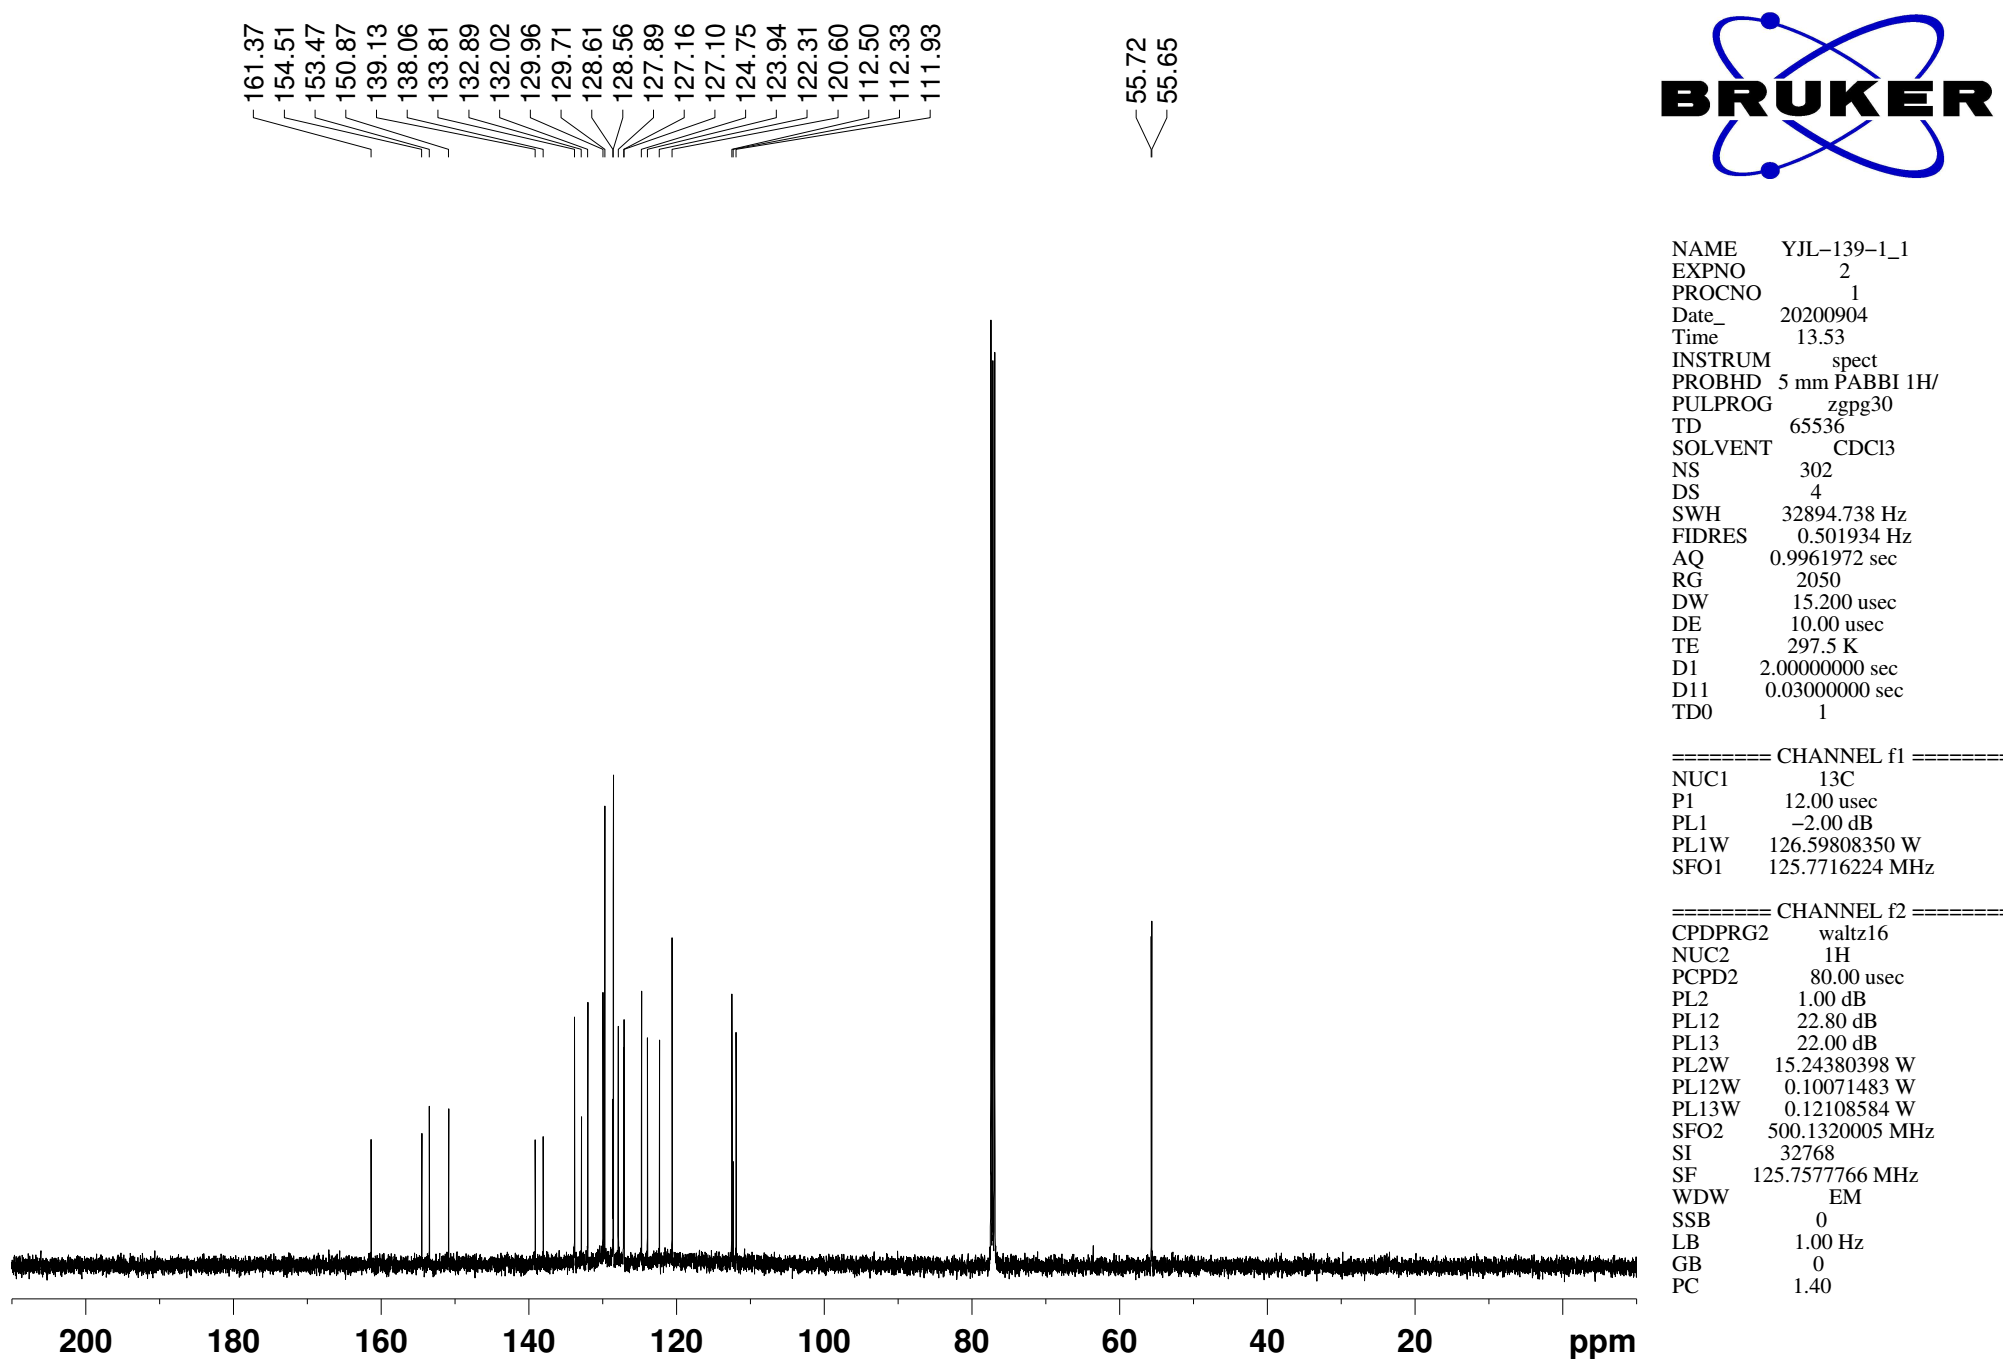


Supplementary Figure 50. 13C NMR (CDCl3, 126MHz) spectra of spectra of 9a


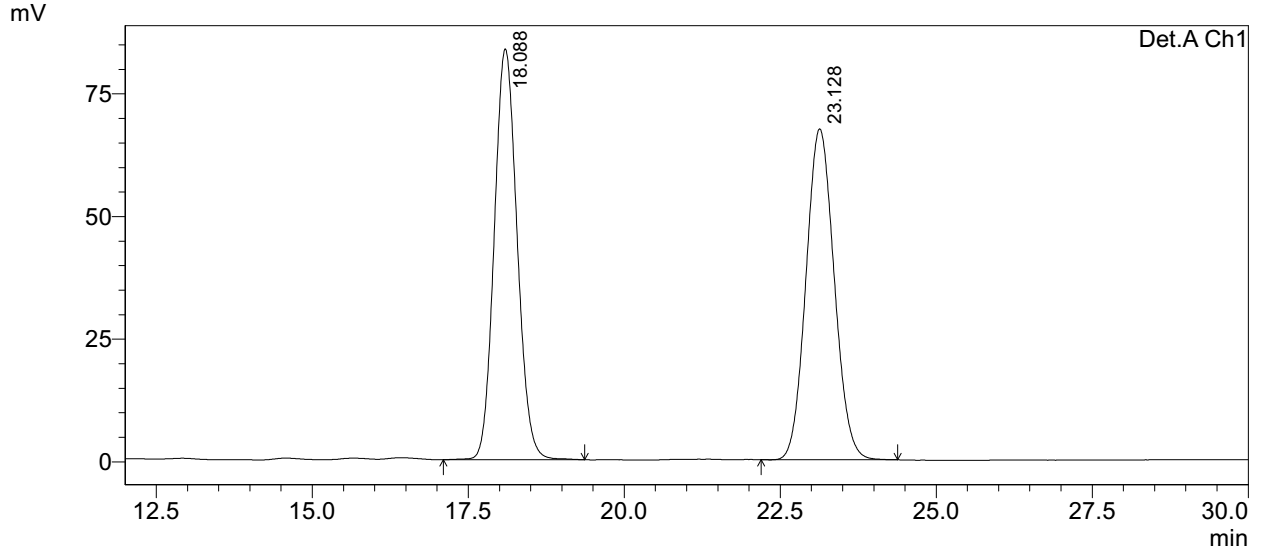


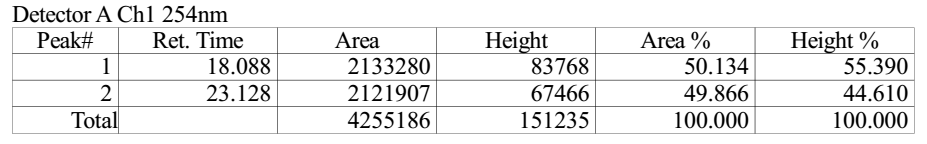


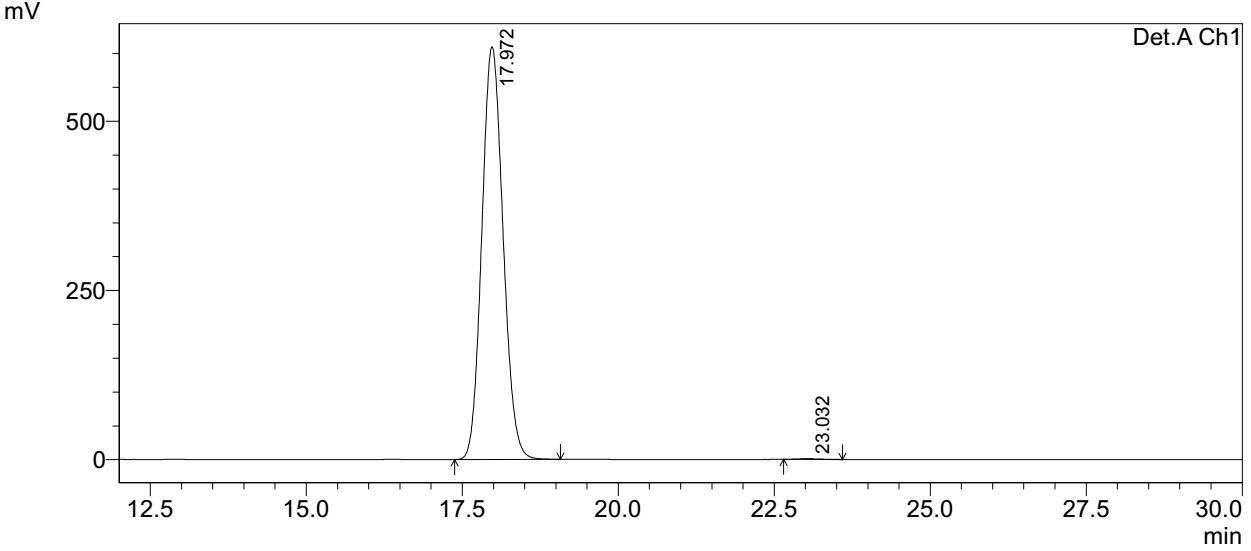


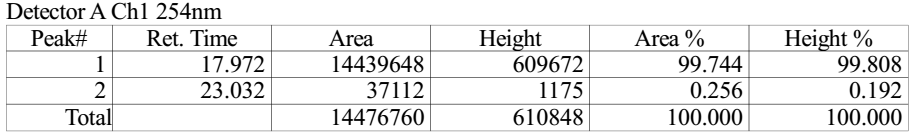


Supplementary Figure 51. HPLC spectra of 9a


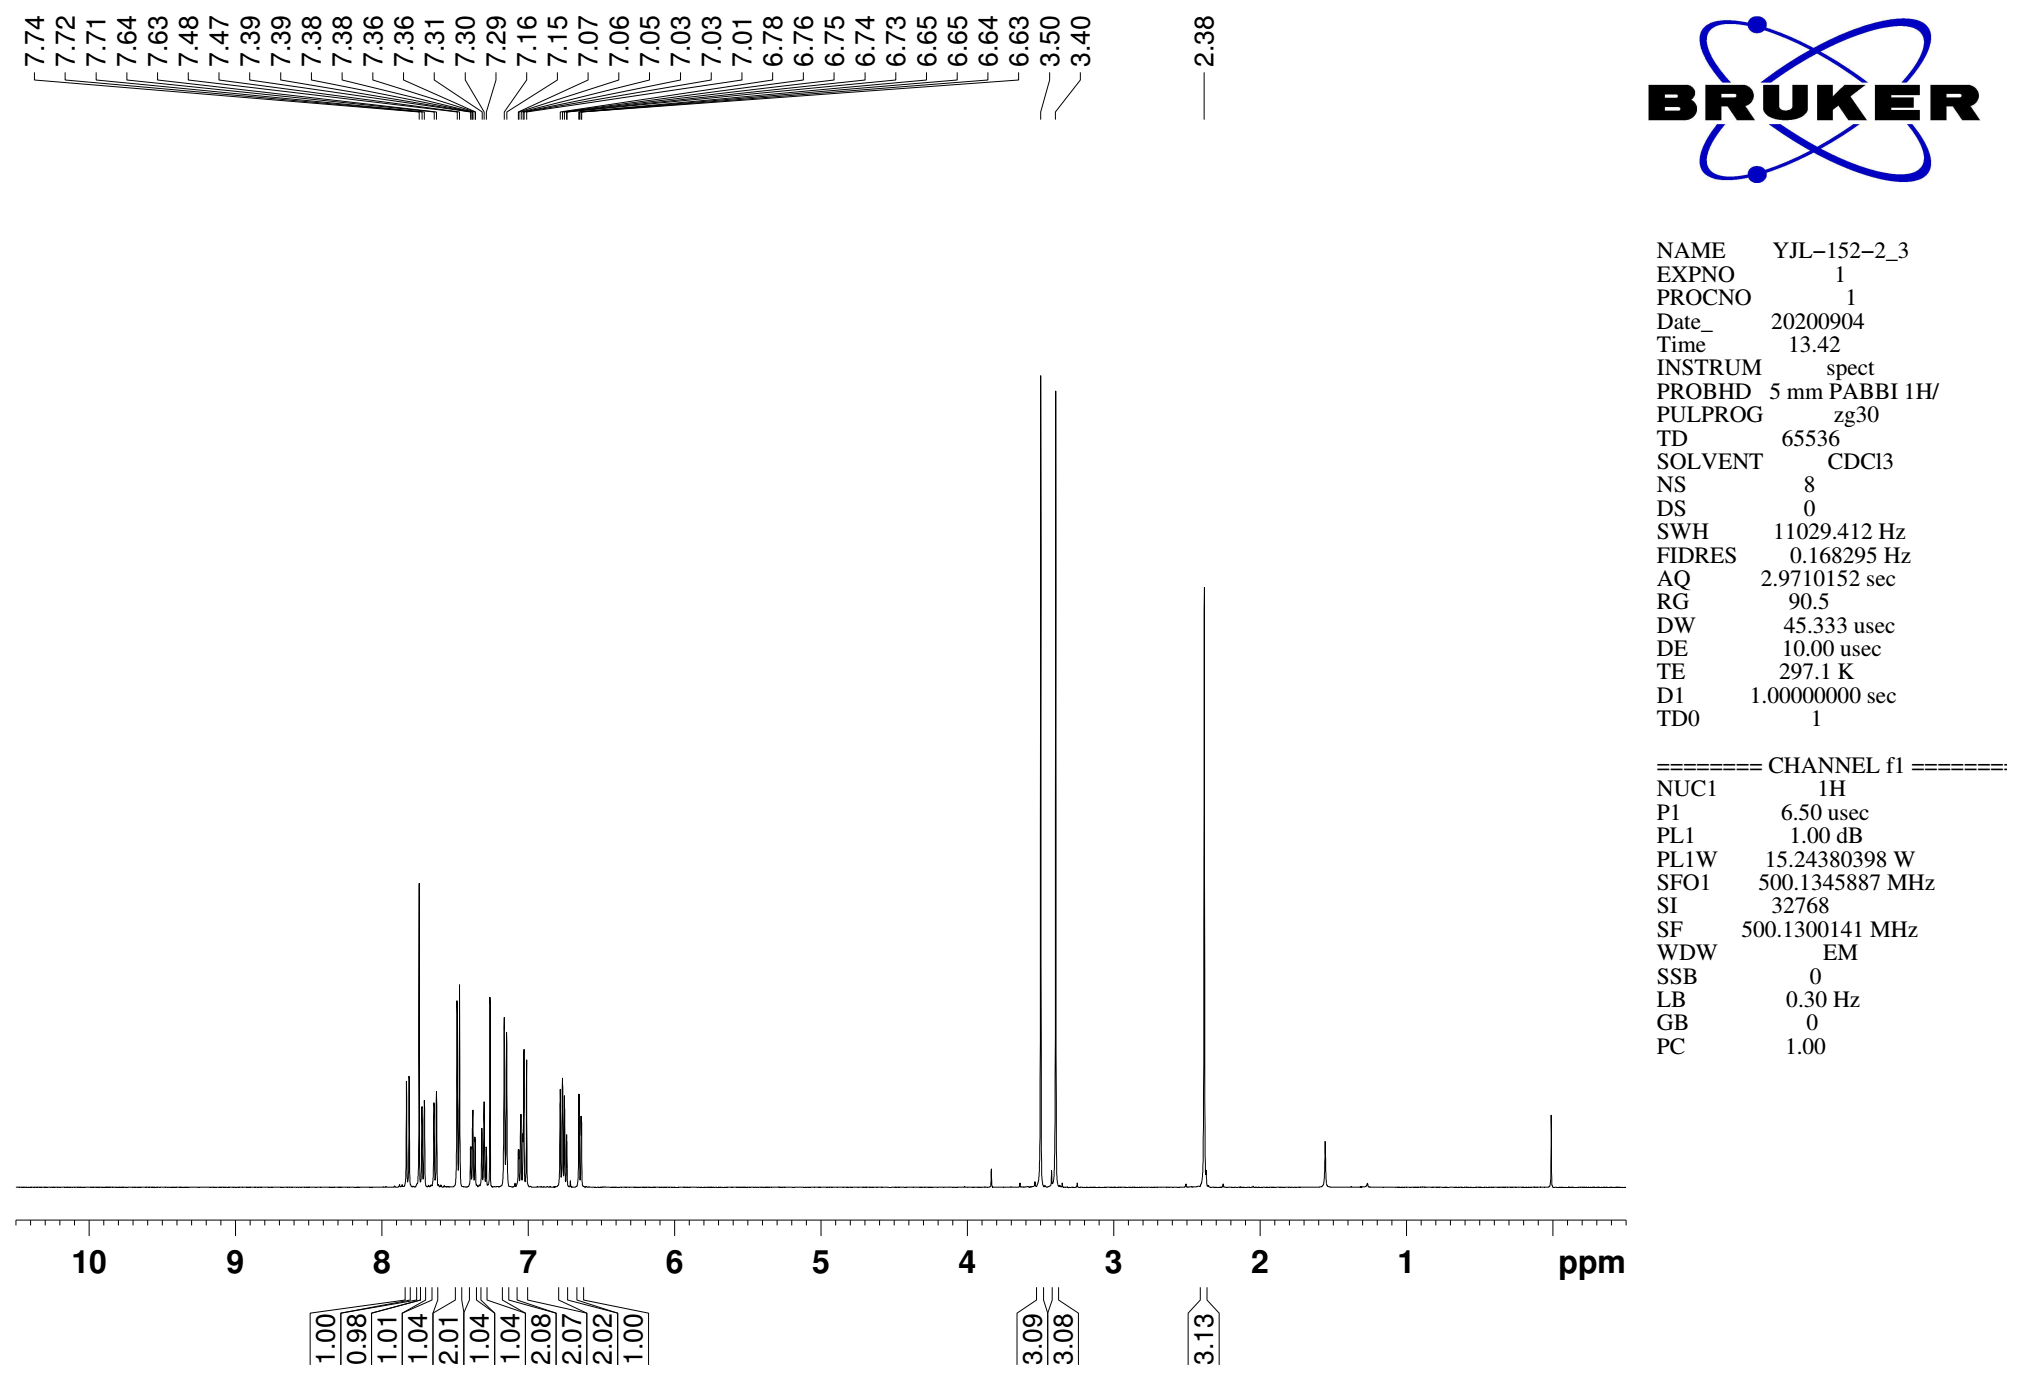


Supplementary Figure 52. 1H NMR (CDCl3, 500MHz) spectra of 9b


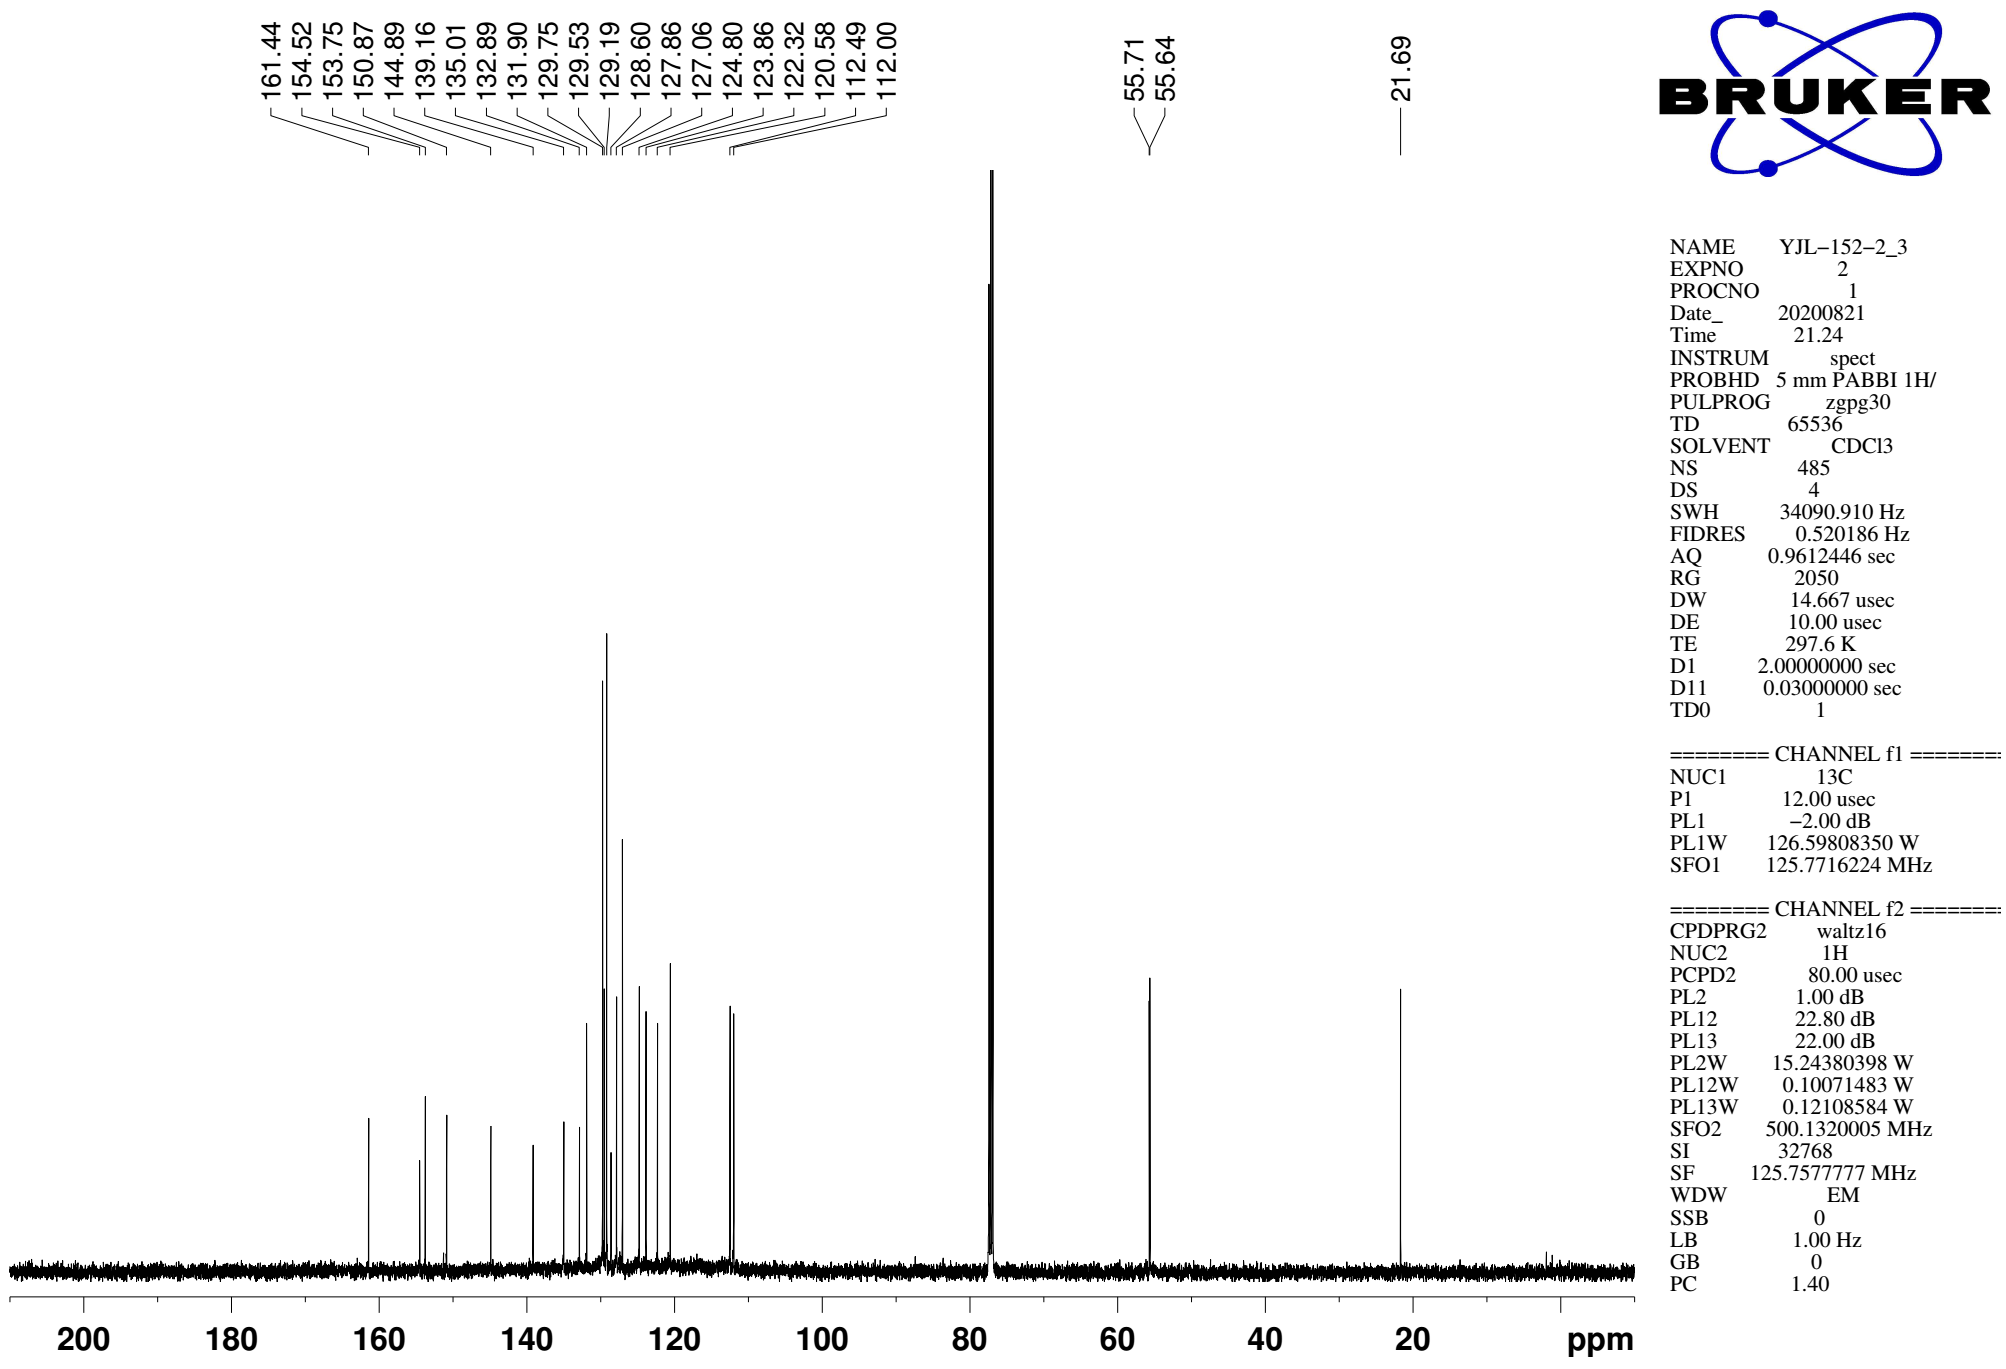


Supplementary Figure 53. 13C NMR (CDCl3, 126MHz) spectra of spectra of 9b


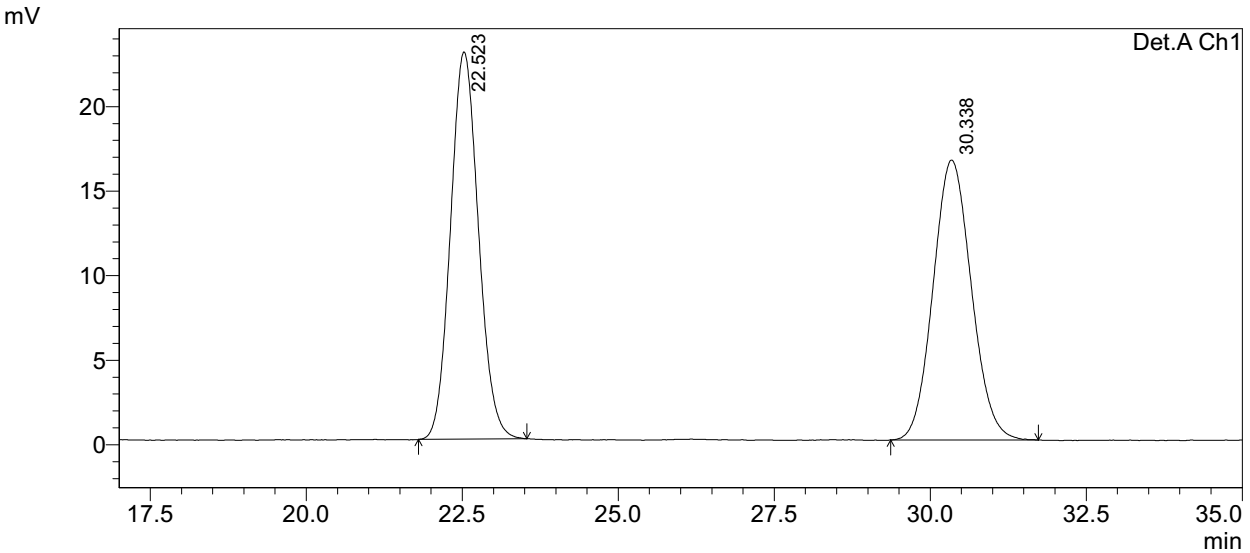


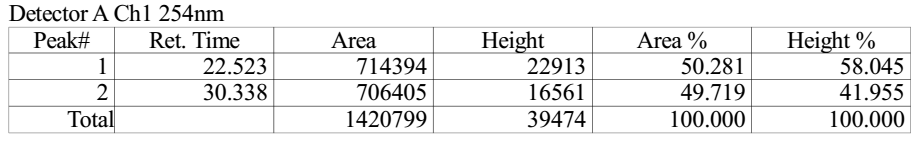


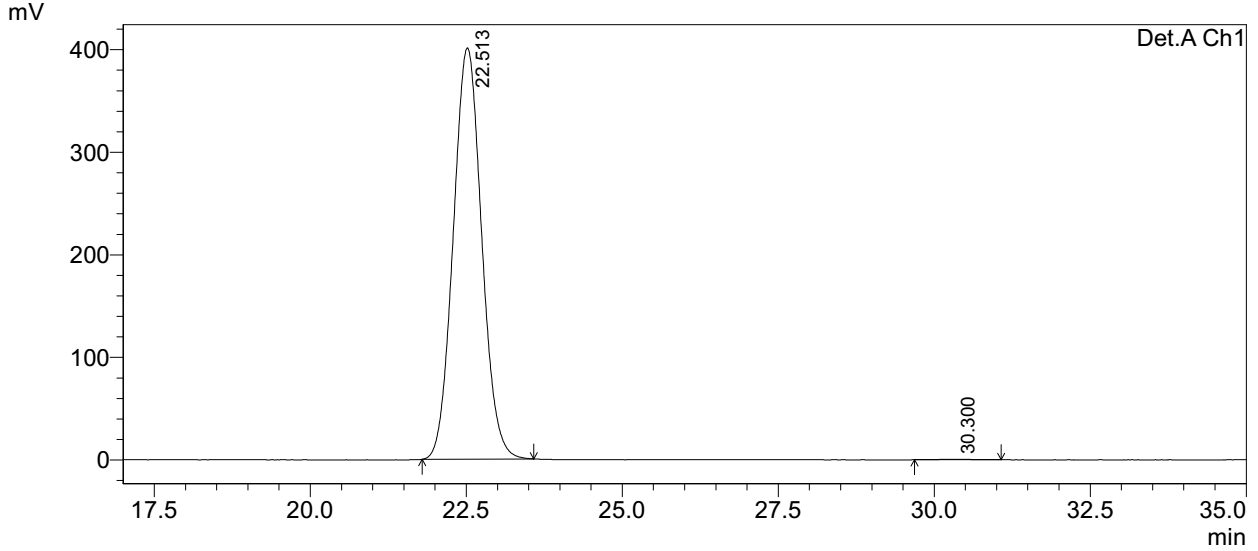


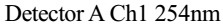


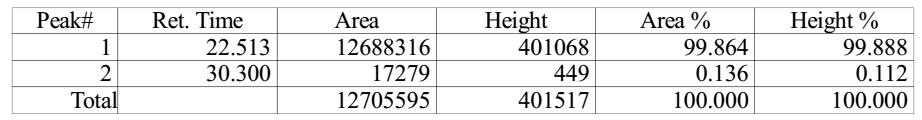


Supplementary Figure 54. HPLC spectra of 9b


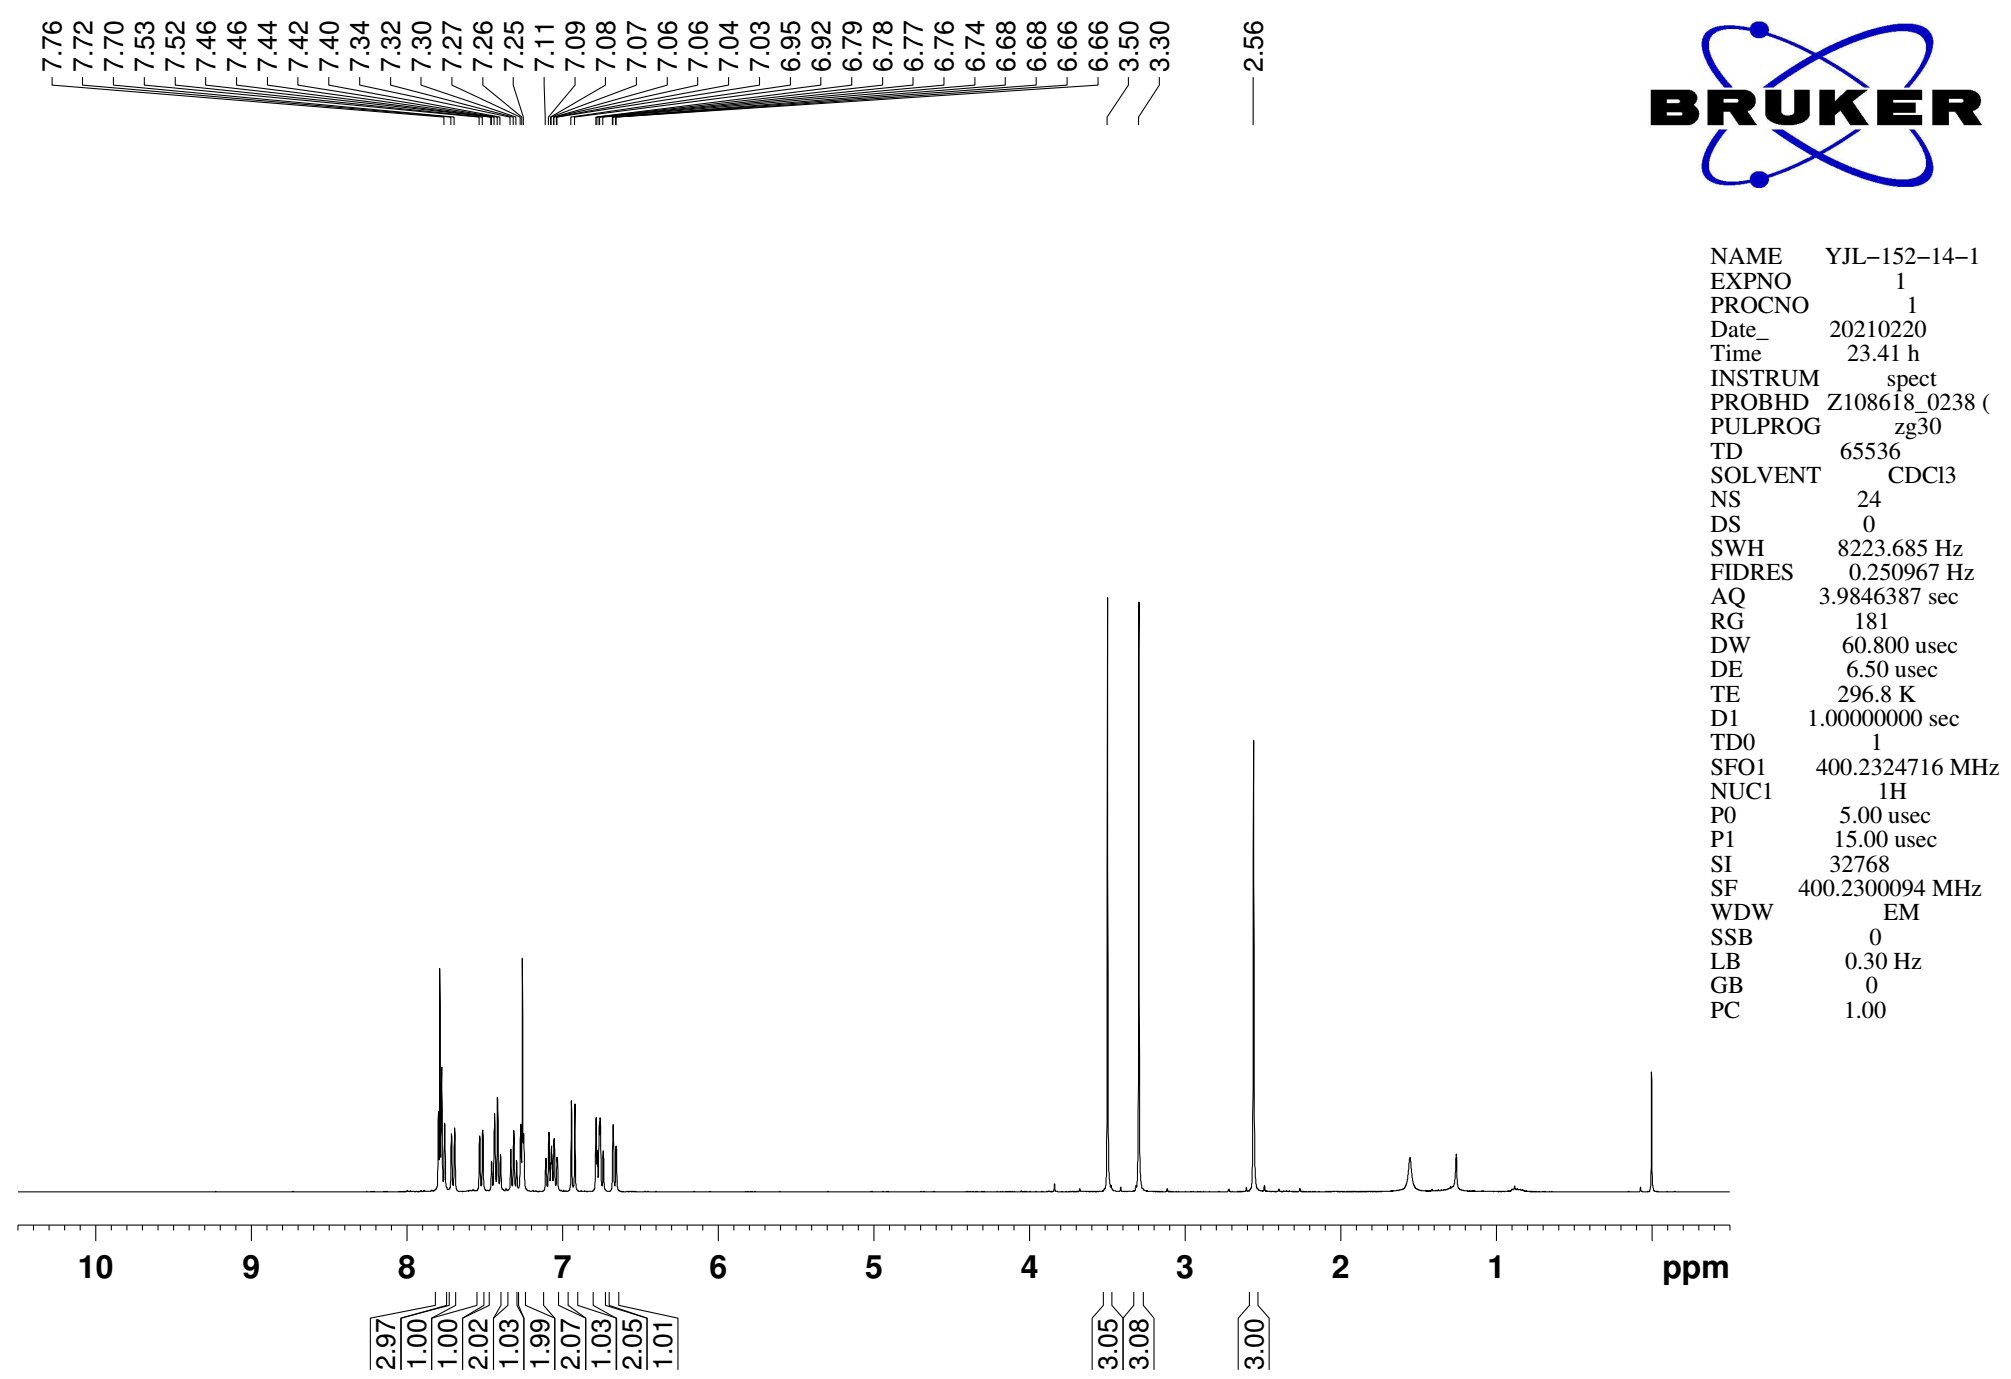


Supplementary Figure 55. 1H NMR (CDCl3, 400MHz) spectra of 9c


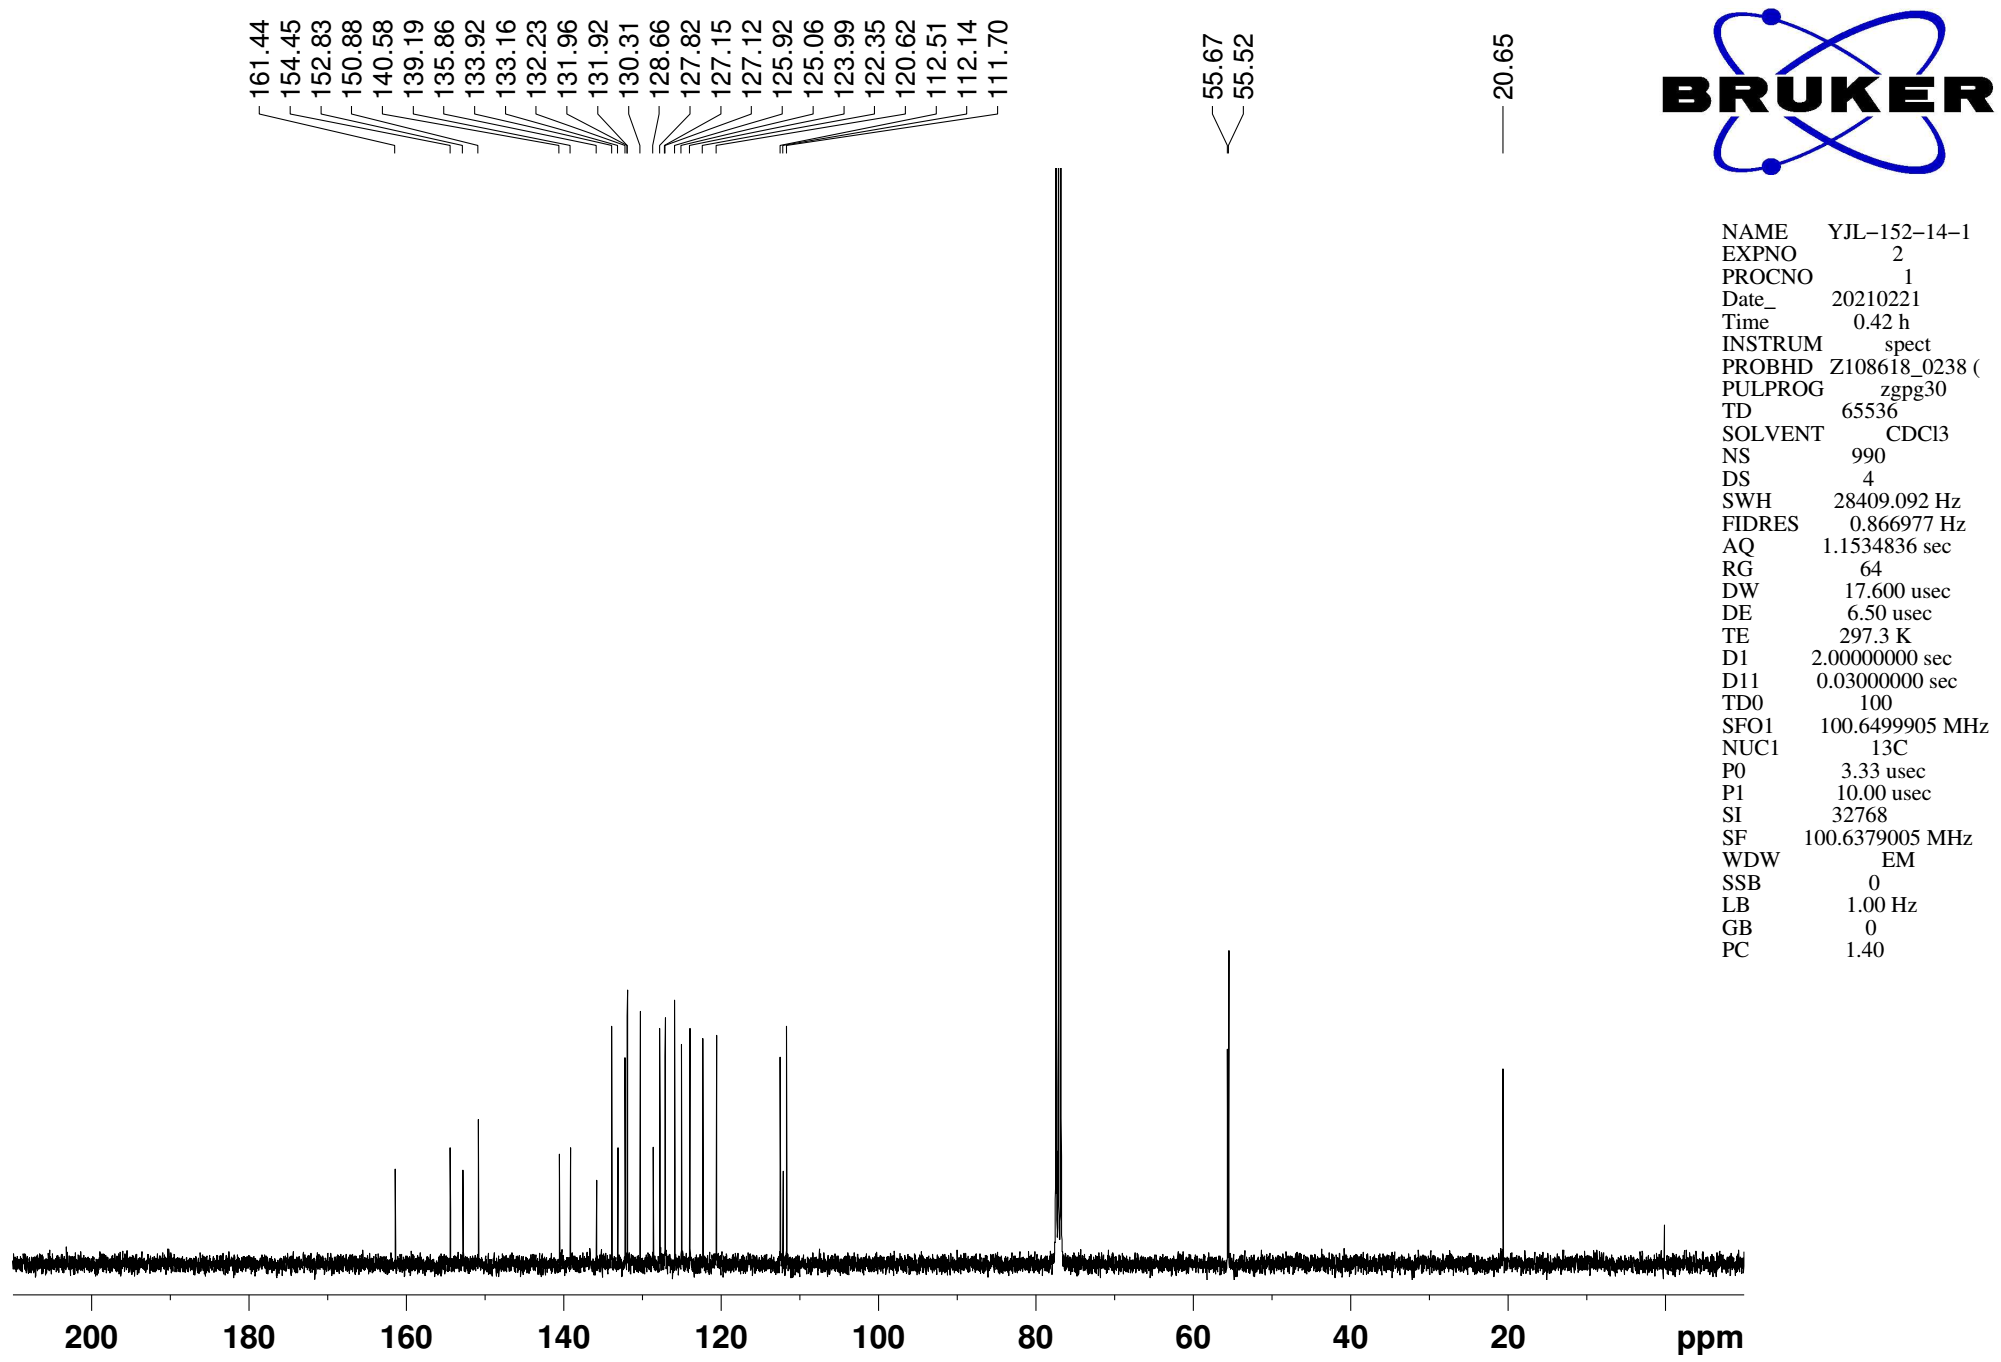


Supplementary Figure 56. 13C NMR (CDCl3, 101MHz) spectra of spectra of 9c


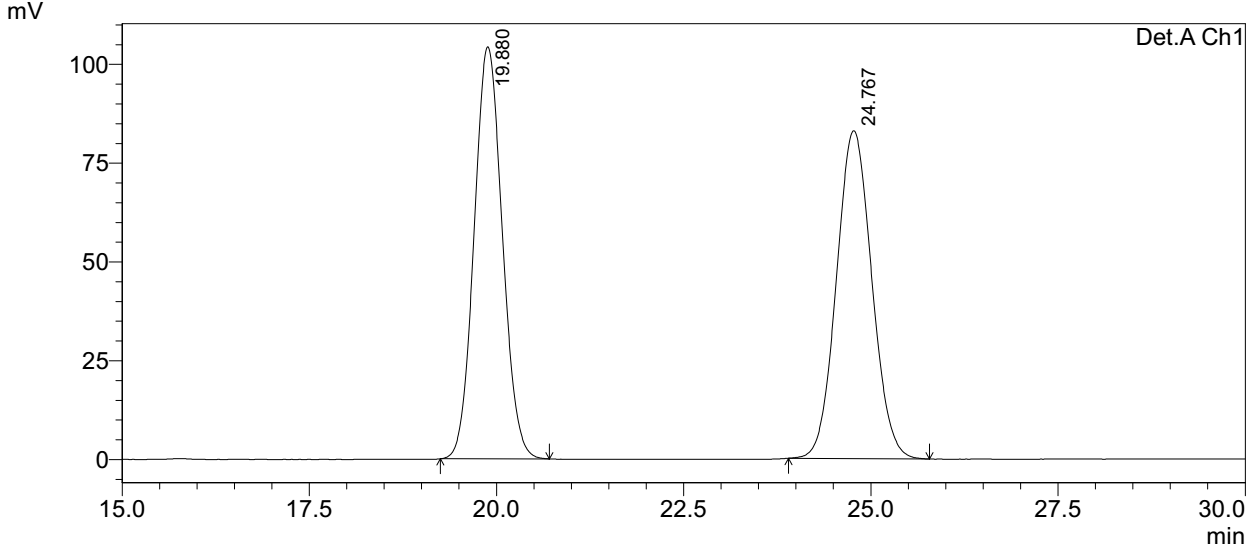


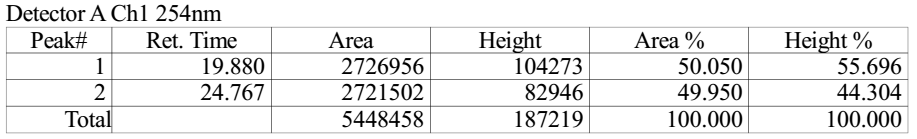


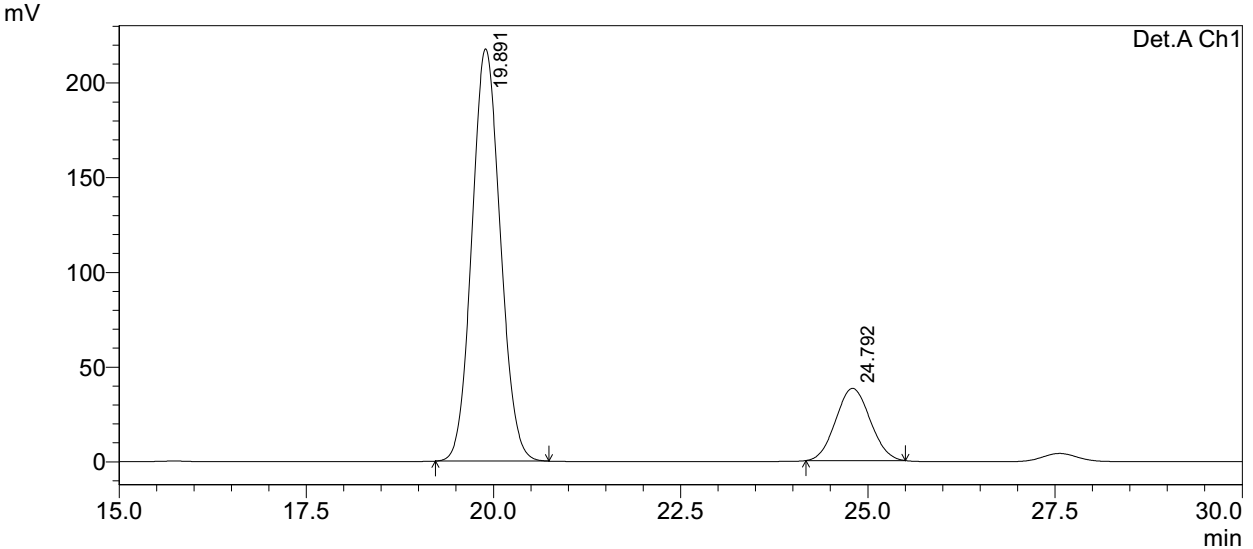


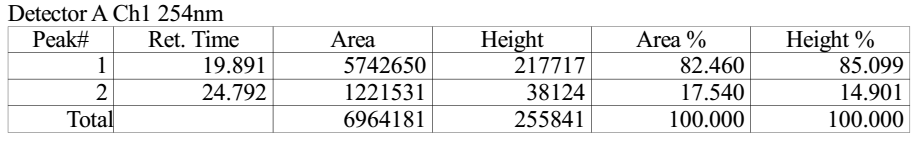


Supplementary Figure 57. HPLC spectra of 9c


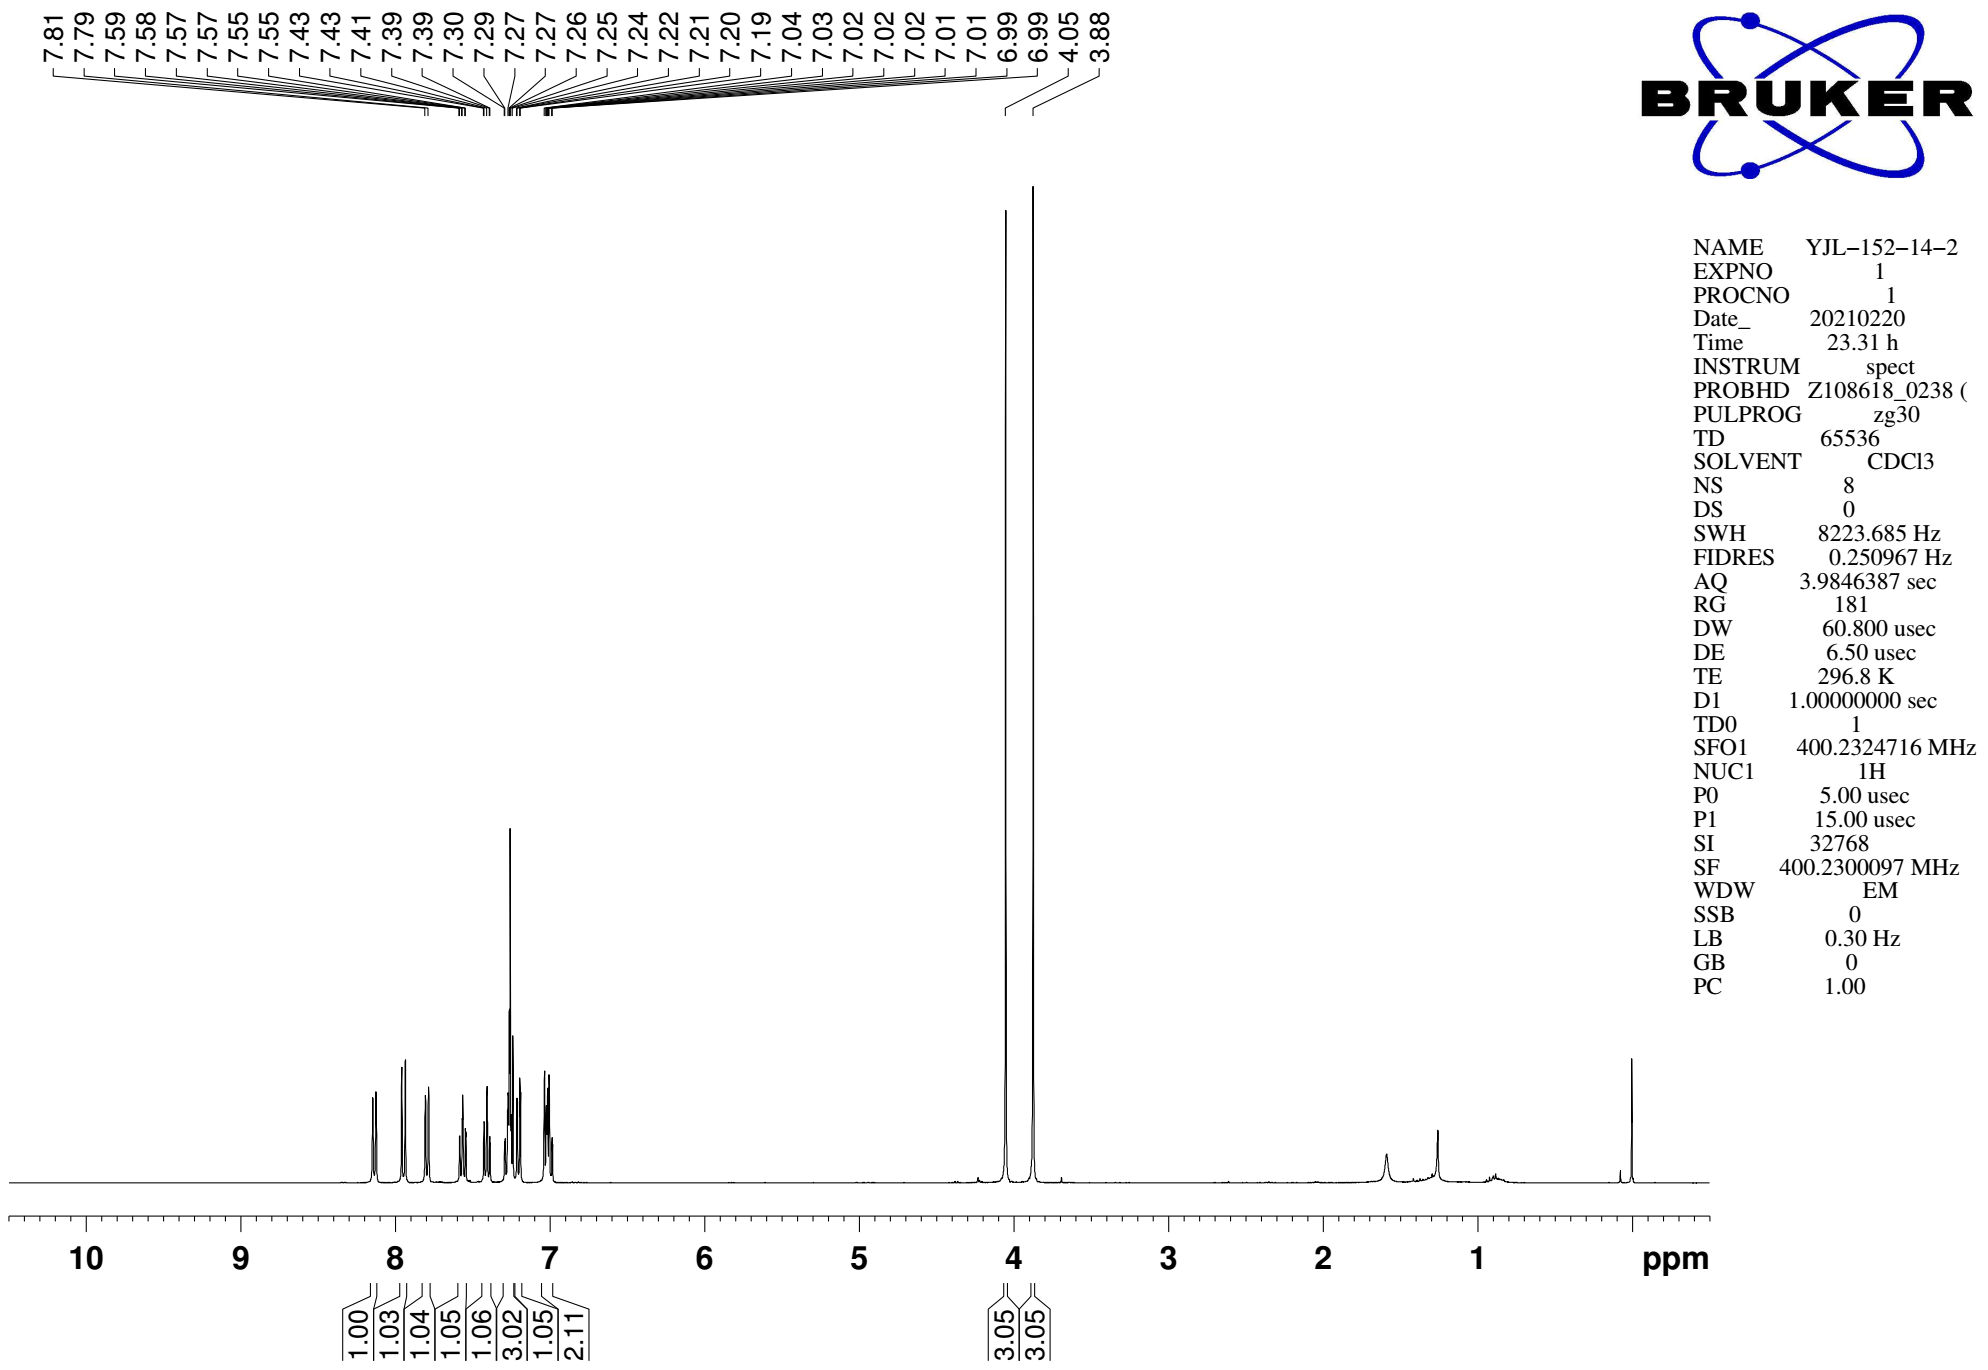


Supplementary Figure 58. 1H NMR (CDCl3, 400MHz) spectra of S15


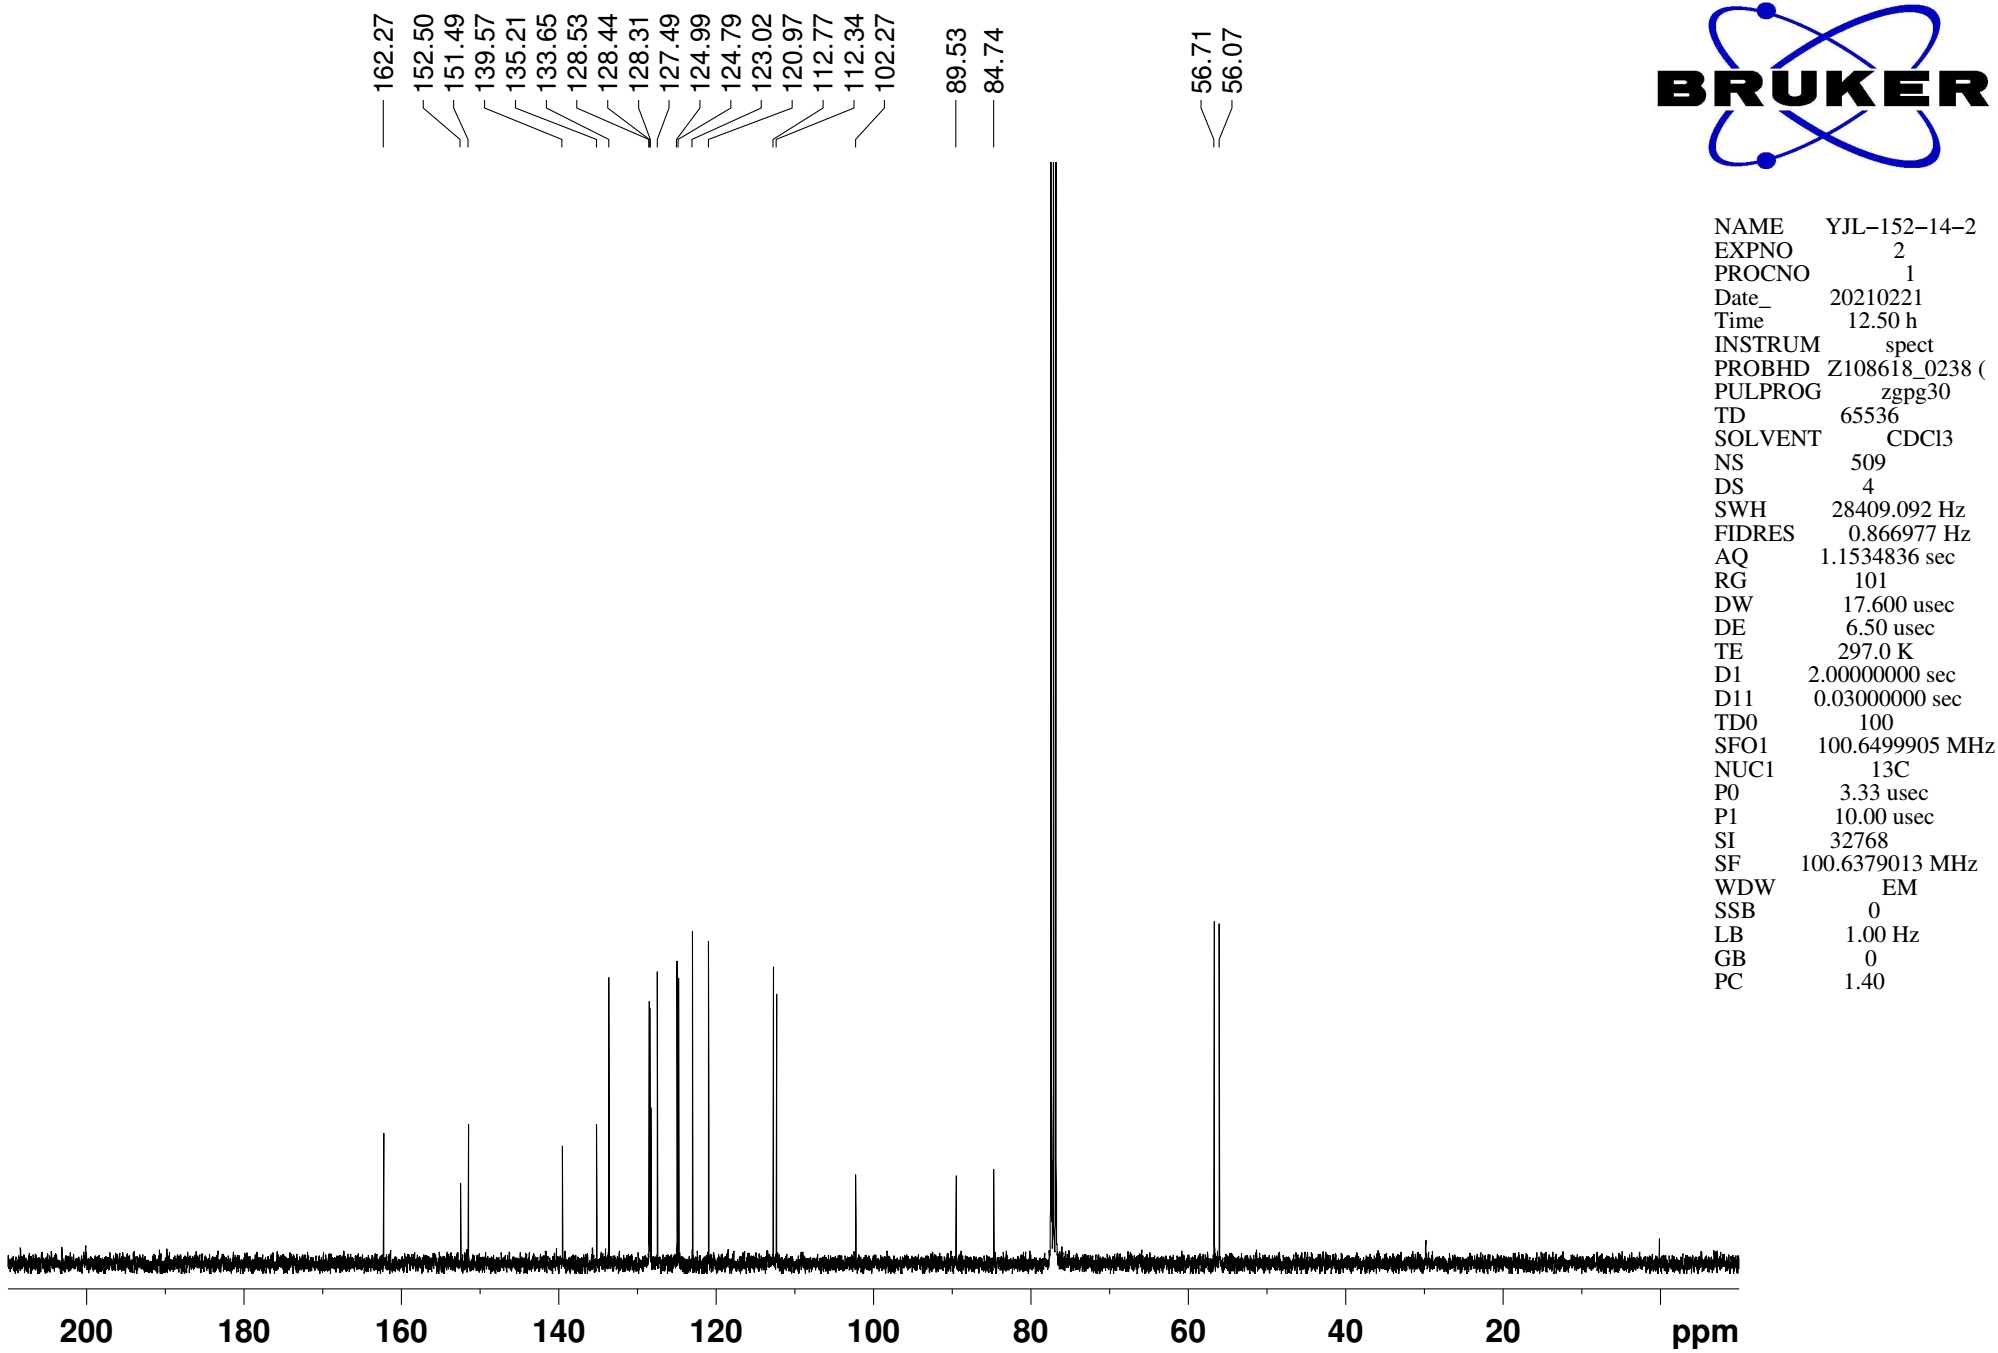


Supplementary Figure 59. 13C NMR (CDCl3, 101MHz) spectra of spectra of S15


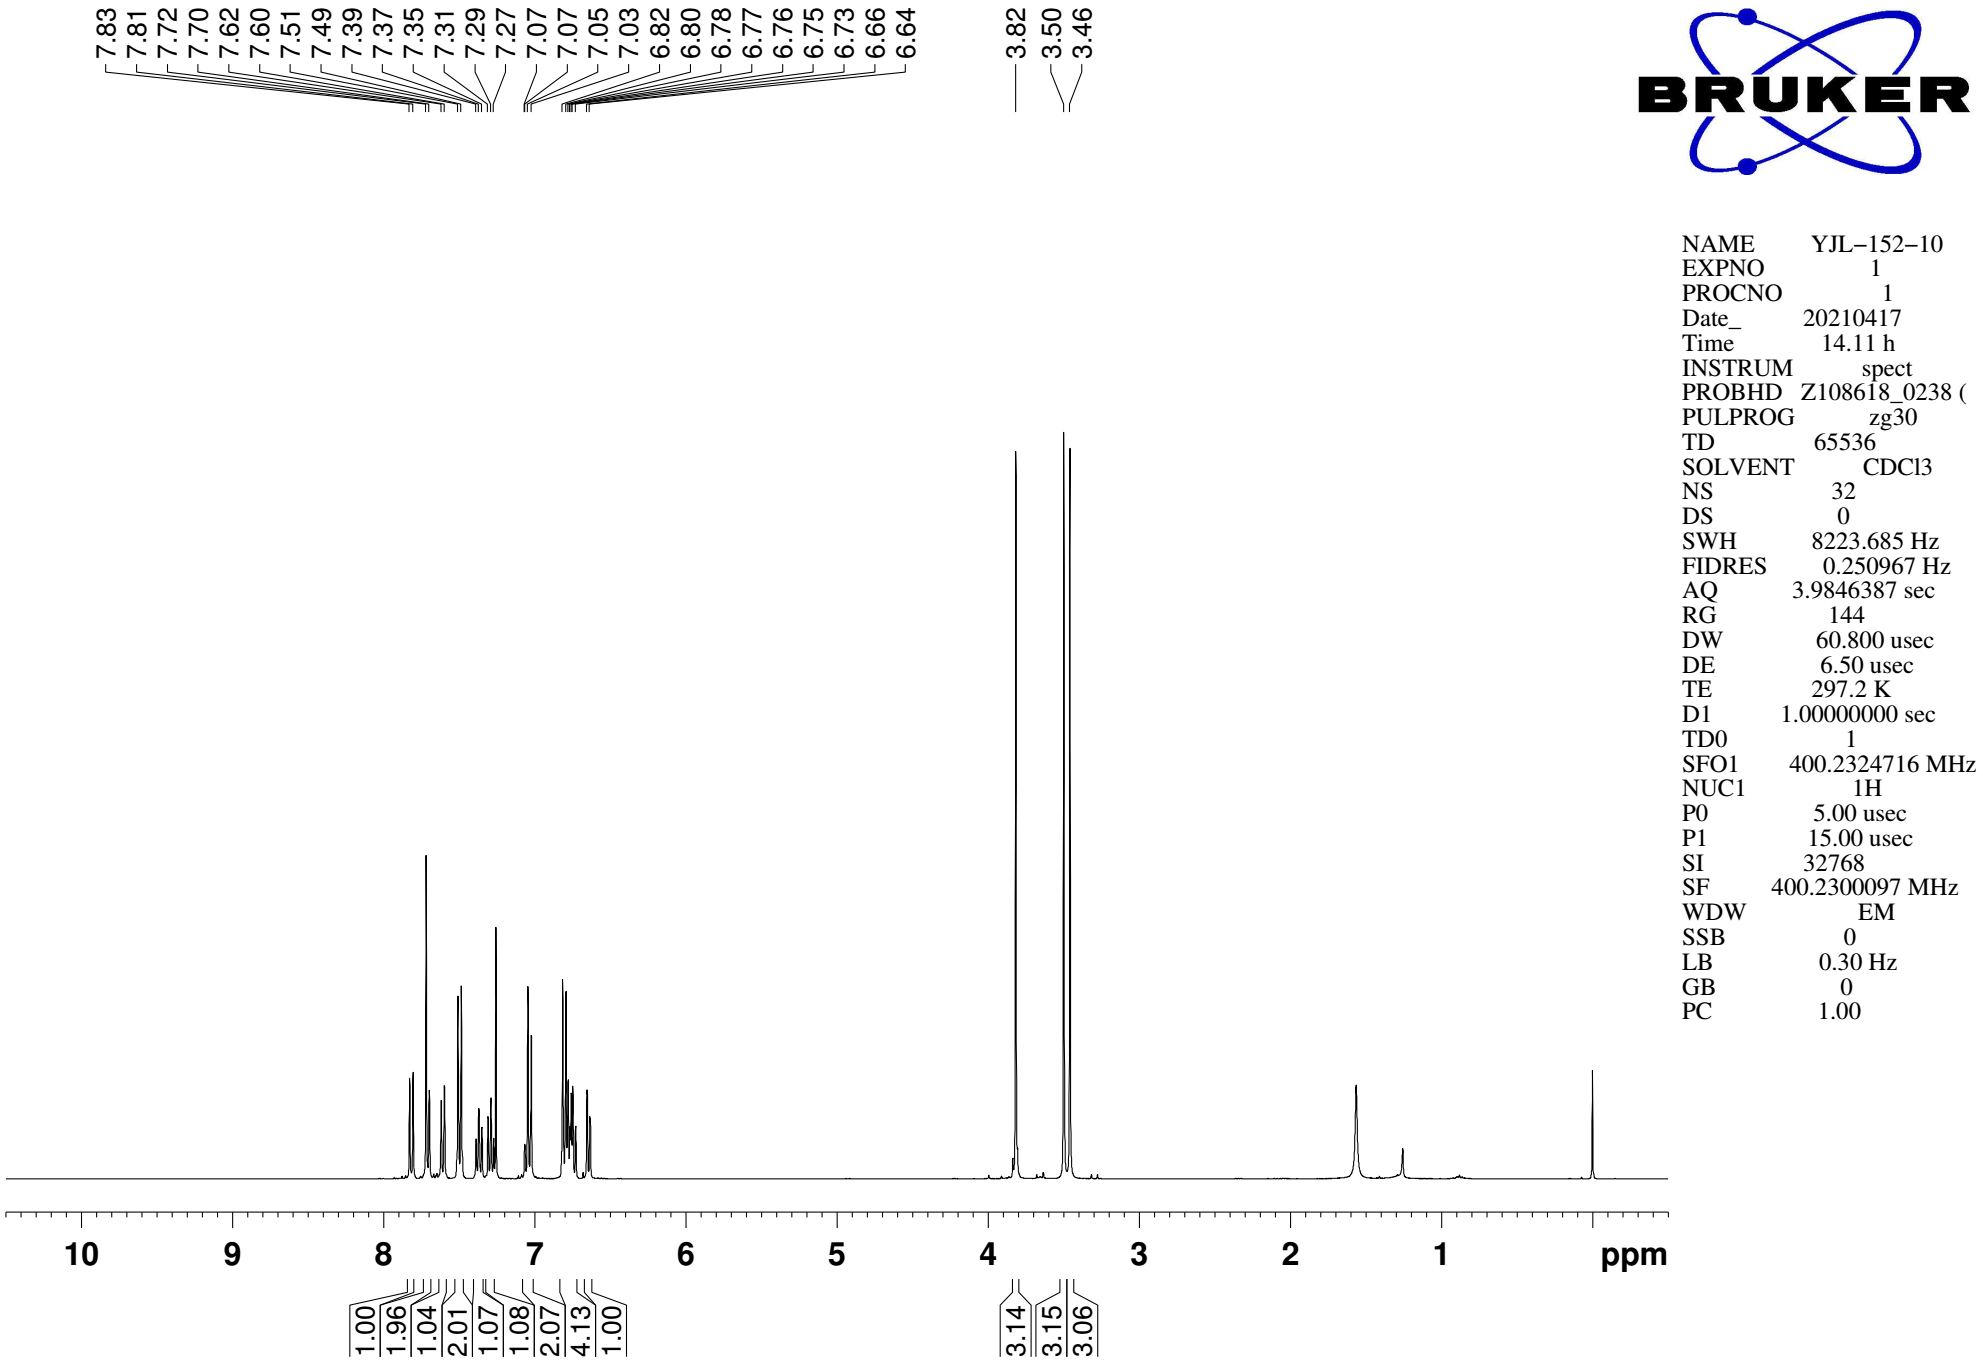


Supplementary Figure 60. 1H NMR (CDCl3, 400MHz) spectra of 9d


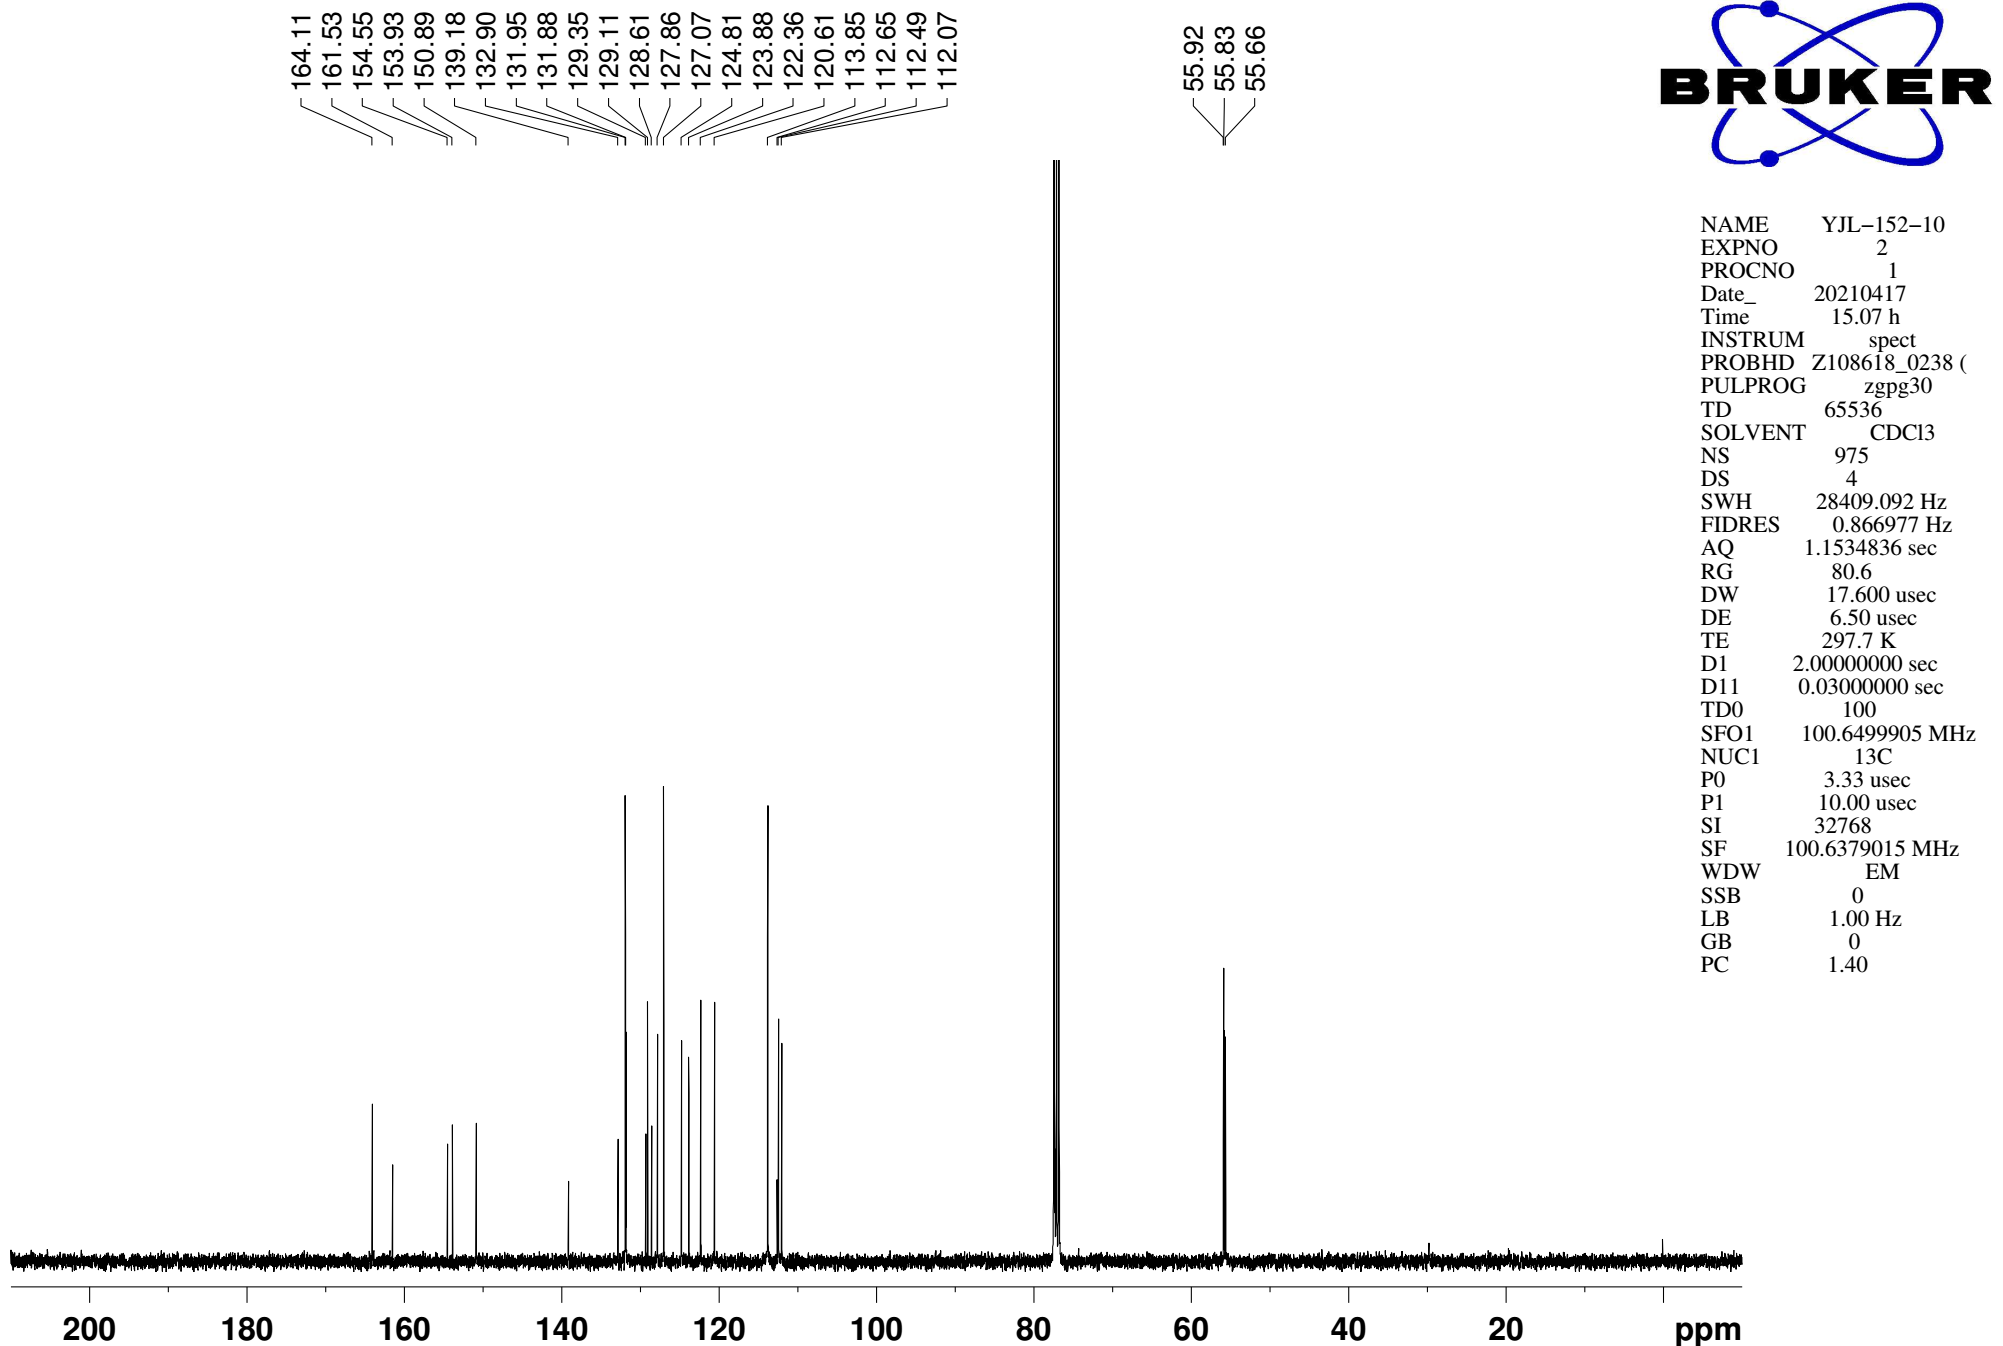


Supplementary Figure 61. 13C NMR (CDCl3, 101MHz) spectra of spectra of 9d


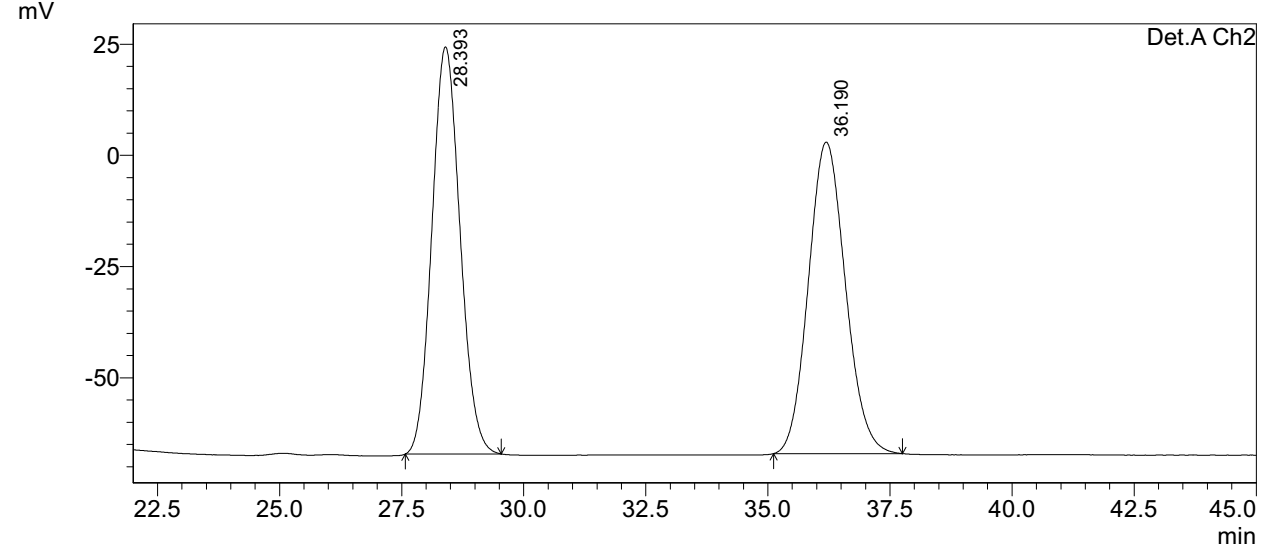


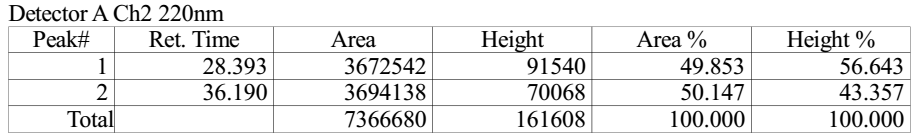


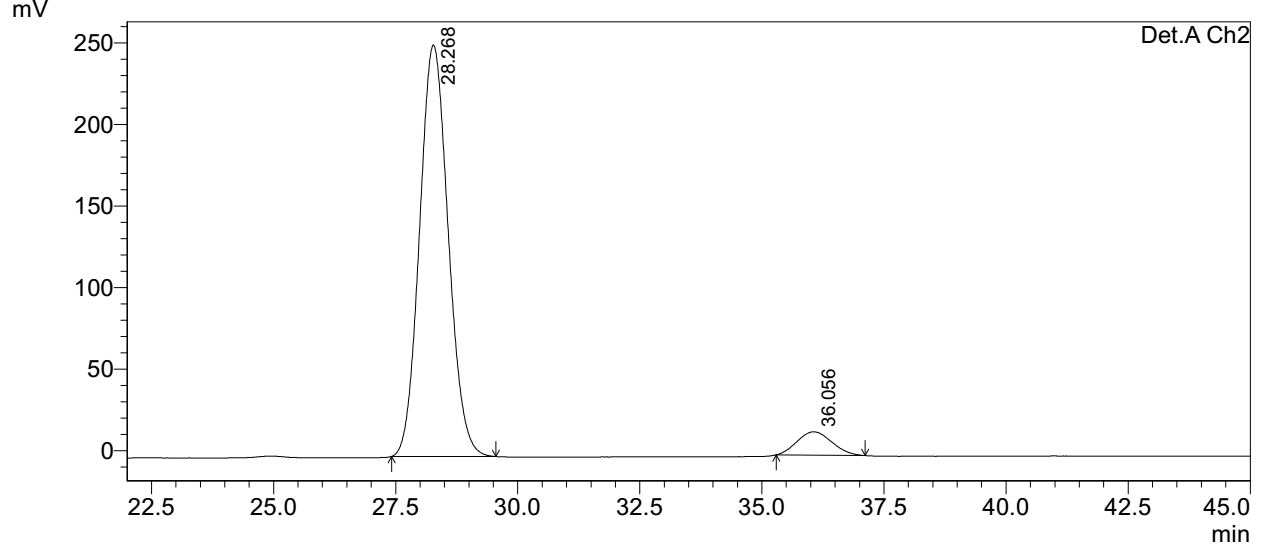


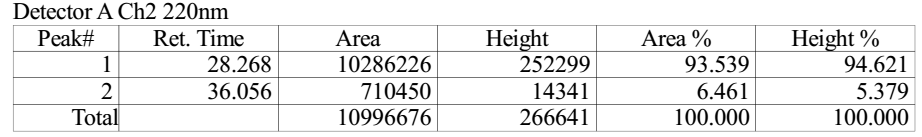


Supplementary Figure 62. HPLC spectra of 9d


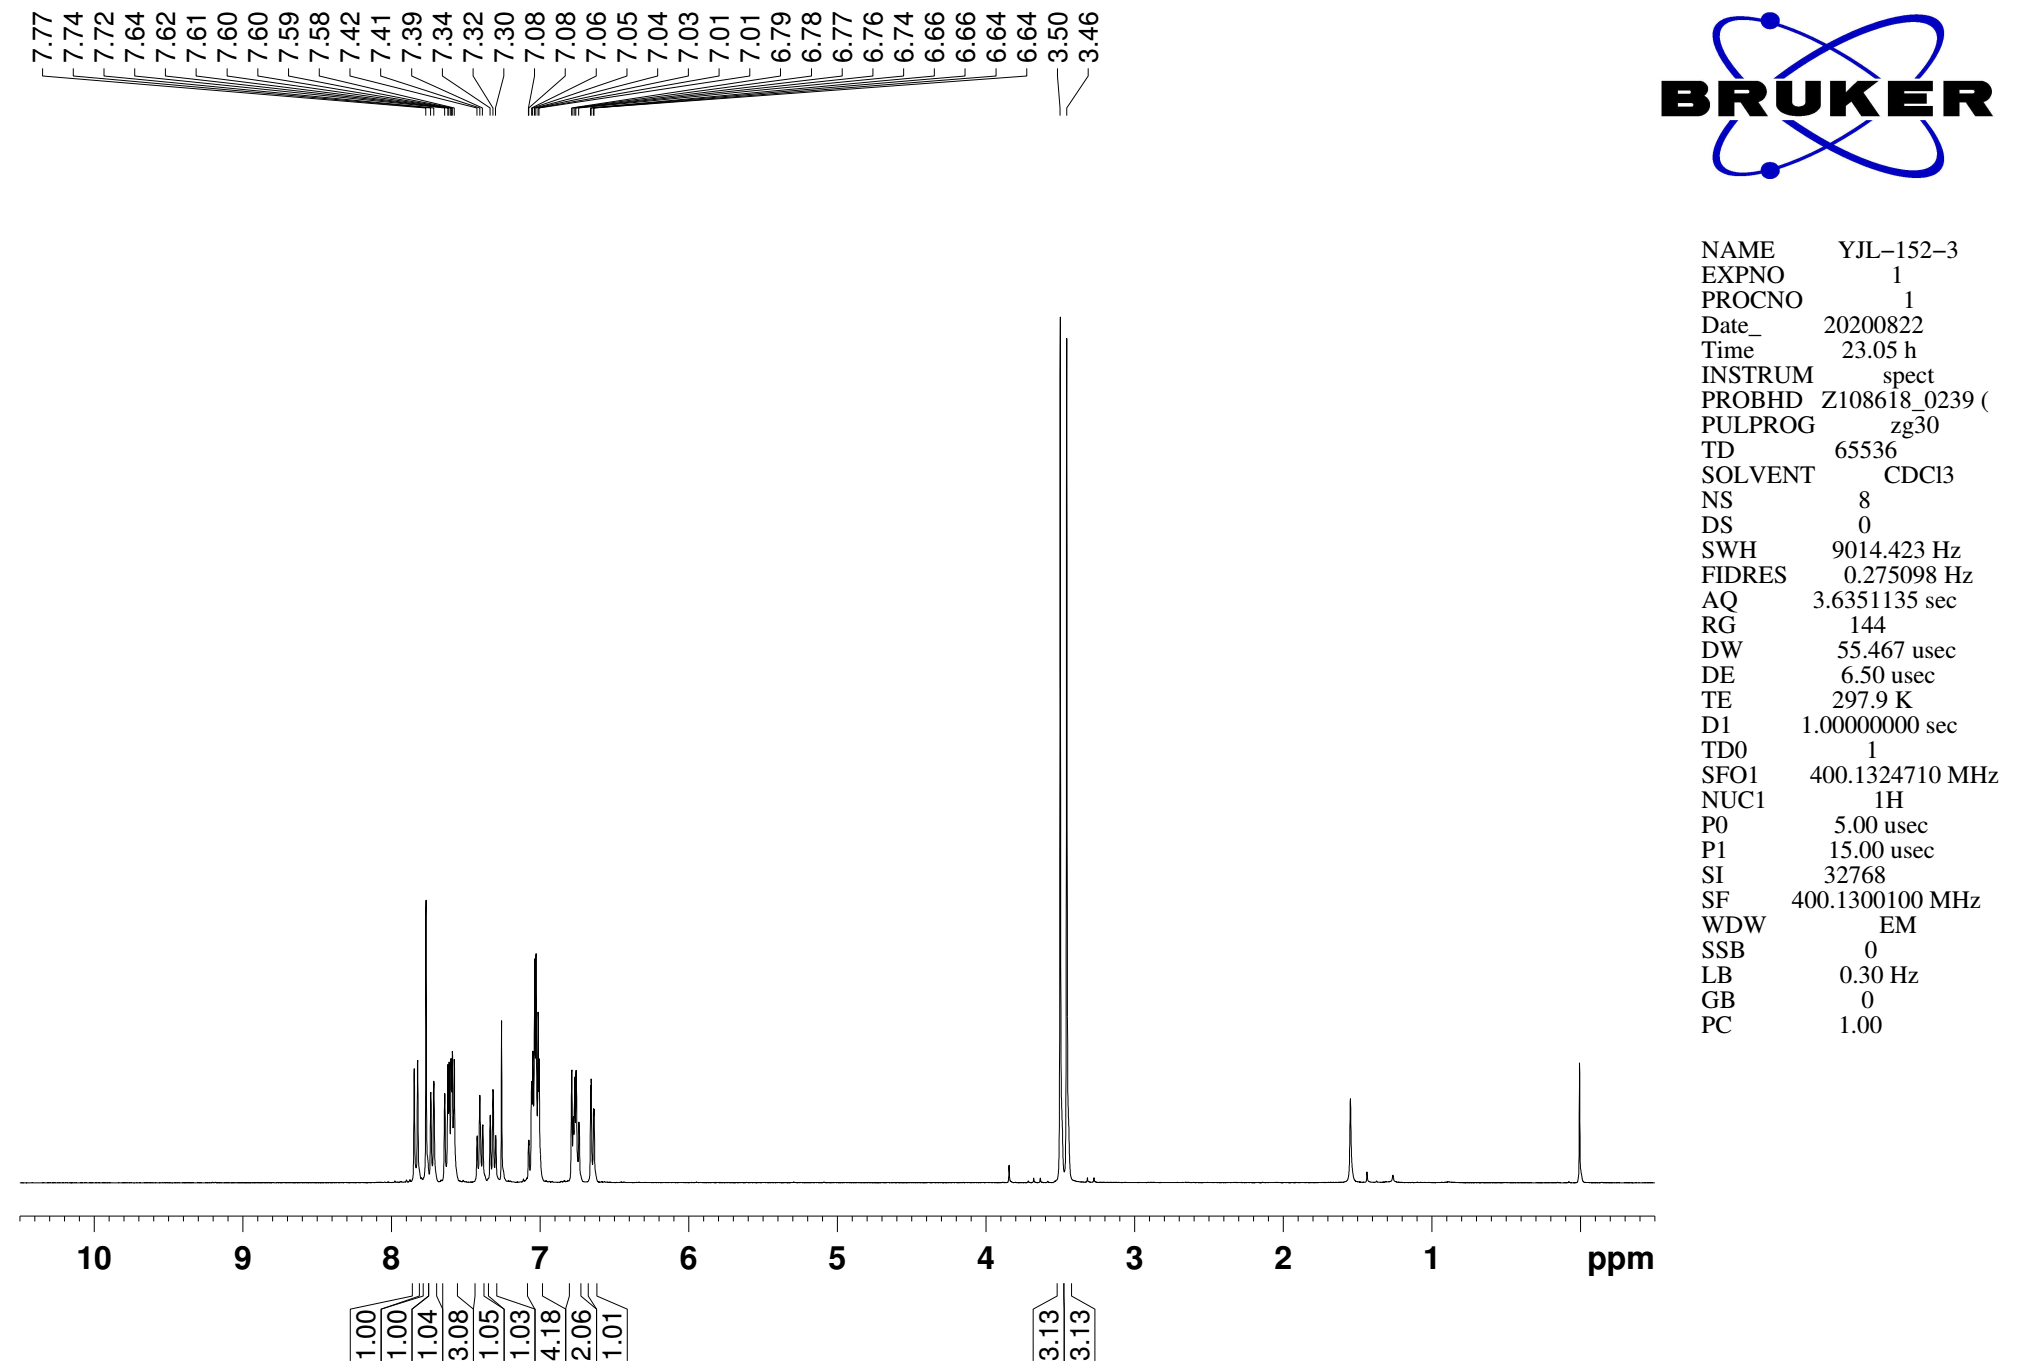


Supplementary Figure 63. 1H NMR (CDCl3, 400MHz) spectra of 9e


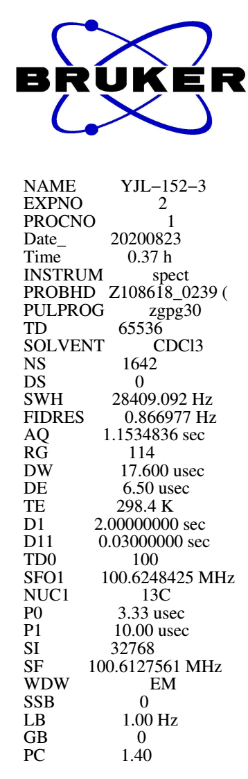

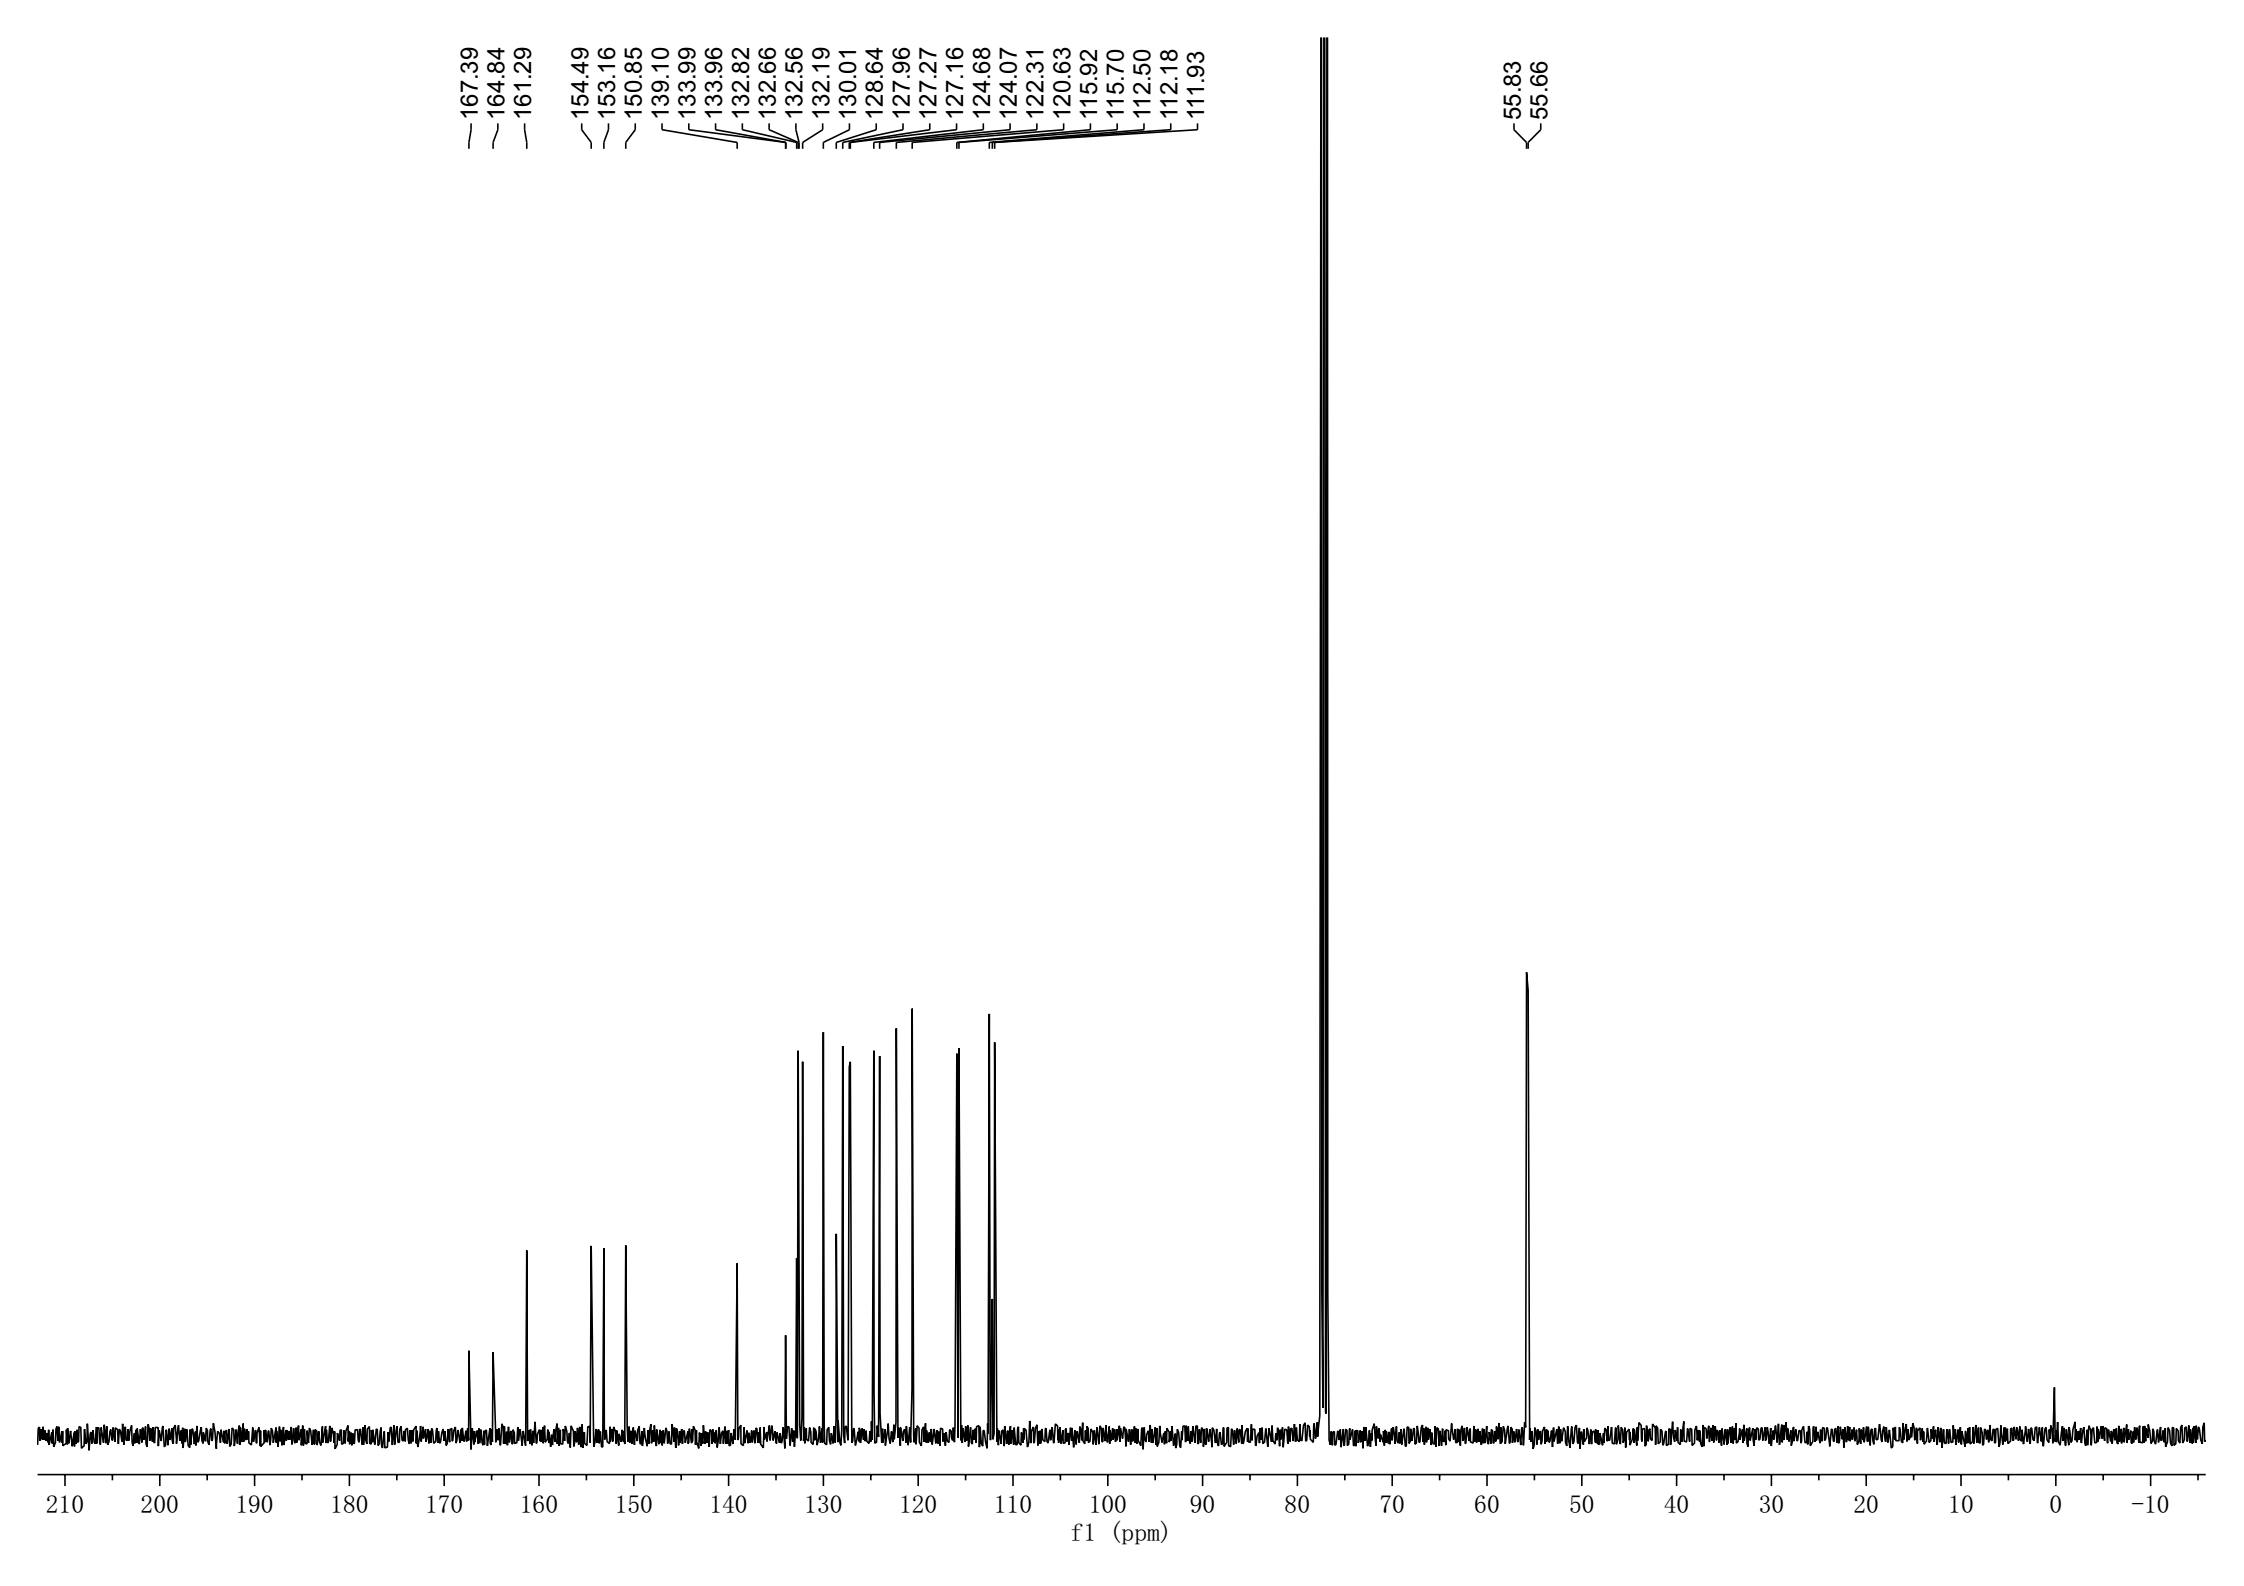


Supplementary Figure 64. 13C NMR (CDCl3, 101MHz) spectra of spectra of 9e


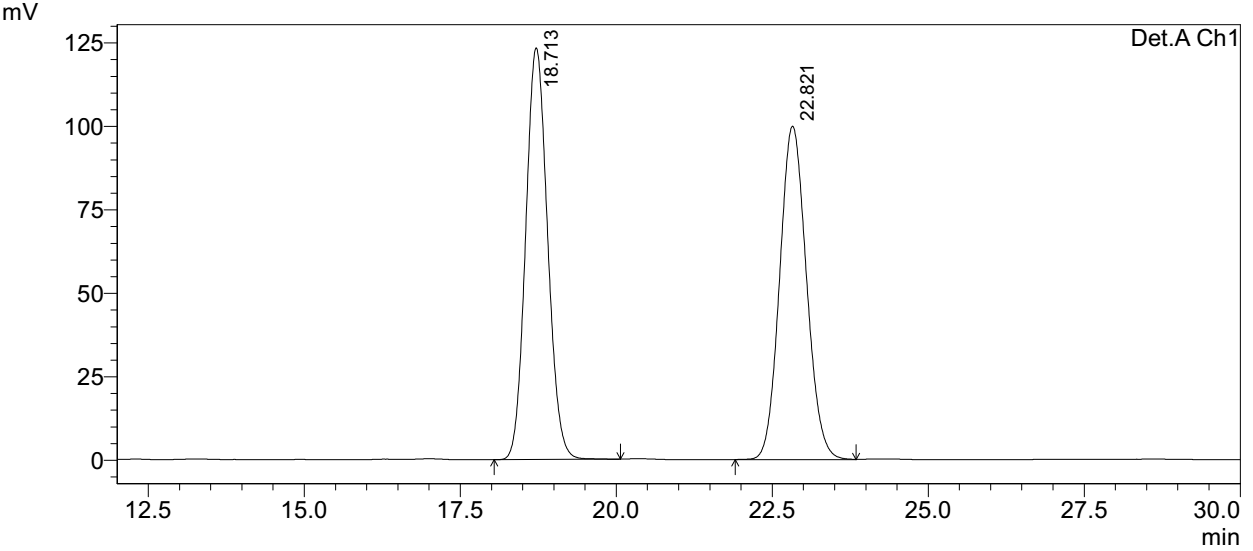


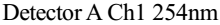


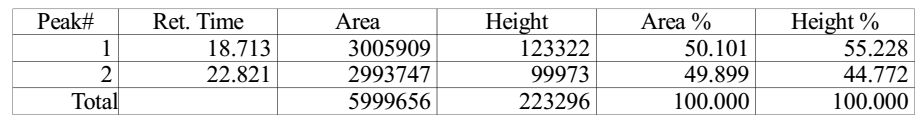


Supplementary Figure 65. HPLC spectra of 9e

Supplementary Figure 41. 1H NMR (CDCl3, 500MHz) spectra of 9f

Supplementary Figure 66. 13C NMR (CDCl3, 126MHz) spectra of spectra of 9f

Supplementary Figure 67. HPLC spectra of 9f

Supplementary Figure 68. 1H NMR (CDCl3, 400MHz) spectra of 9g

Supplementary Figure 69. 13C NMR (CDCl3, 101MHz) spectra of spectra of 9g

Supplementary Figure 70. HPLC spectra of 9g

Supplementary Figure 71. 1H NMR (CDCl3, 400MHz) spectra of 9h

Supplementary Figure 72. 13C NMR (CDCl3, 126MHz) spectra of spectra of 9h

Supplementary Figure 73. HPLC spectra of 9h

Supplementary Figure 74. 1H NMR (CDCl3, 400MHz) spectra of 9i

Supplementary Figure 75. 13C NMR (CDCl3, 101MHz) spectra of spectra of 9i

Supplementary Figure 76. HPLC spectra of 9i

Supplementary Figure 77. 1H NMR (CDCl3, 400MHz) spectra of 9j

Supplementary Figure 78. 13C NMR (CDCl3, 101MHz) spectra of spectra of 9j

Supplementary Figure 79. HPLC spectra of 9j

Supplementary Figure 80. 1H NMR (CDCl3, 500MHz) spectra of 9k

Supplementary Figure 81. 13C NMR (CDCl3, 126MHz) spectra of spectra of 9k

Supplementary Figure 82. HPLC spectra of 9k

Supplementary Figure 83. 1H NMR (CDCl3, 500MHz) spectra of 9l

Supplementary Figure 84. 13C NMR (CDCl3, 126MHz) spectra of spectra of 9l

Supplementary Figure 85. HPLC spectra of 9l

Supplementary Figure 86. 1H NMR (CDCl3, 500MHz) spectra of 9m

Supplementary Figure 87. 13C NMR (CDCl3, 126MHz) spectra of spectra of 9m

Supplementary Figure 88. HPLC spectra of 9m

Supplementary Figure 89. 1H NMR (CDCl3, 500MHz) spectra of 9n

Supplementary Figure 90. 13C NMR (CDCl3, 126MHz) spectra of spectra of 9n

Supplementary Figure 91. HPLC spectra of 9n

Supplementary Figure 92. 1H NMR (CDCl3, 500MHz) spectra of 9o

Supplementary Figure 93. 13C NMR (CDCl3, 126MHz) spectra of spectra of 9o

Supplementary Figure 94. HPLC spectra of 9o

Supplementary Figure 95. 1H NMR (CDCl3, 400MHz) spectra of 9p

Supplementary Figure 96. 13C NMR (CDCl3, 101MHz) spectra of spectra of 9p

Supplementary Figure 97. HPLC spectra of 9p

Supplementary Figure 98. 1H NMR (CDCl3, 400MHz) spectra of 9q

Supplementary Figure 99. 13C NMR (CDCl3, 101MHz) spectra of spectra of 9q

Supplementary Figure 100. HPLC spectra of 9q

Supplementary Figure 101. 1H NMR (CDCl3, 500MHz) spectra of 9r

Supplementary Figure 102. 13C NMR (CDCl3, 126MHz) spectra of spectra of 9r

Supplementary Figure 103. HPLC spectra of 9r

Supplementary Figure 104. 1H NMR (CDCl3, 400MHz) spectra of 9s

Supplementary Figure 105. 13C NMR (CDCl3, 101MHz) spectra of spectra of 9s

Supplementary Figure 106. HPLC spectra of 9s

Supplementary Figure 107. 1H NMR (CDCl3, 400MHz) spectra of 9t

Supplementary Figure 108. 13C NMR (CDCl3, 101MHz) spectra of spectra of 9t

Supplementary Figure 109. HPLC spectra of 9t

Supplementary Figure 110. 1H NMR (CDCl3, 400MHz) spectra of 9u

Supplementary Figure 111. 13C NMR (CDCl3, 101MHz) spectra of spectra of 9u

Supplementary Figure 112. HPLC spectra of 9u

Supplementary Figure 113. 1H NMR (CDCl3, 400MHz) spectra of 9v

Supplementary Figure 114. 13C NMR (CDCl3, 101MHz) spectra of spectra of 9v

Supplementary Figure 115. HPLC spectra of 9v

Supplementary Figure 115. 1H NMR (CDCl3, 400MHz) spectra of 9w

Supplementary Figure 117. 13C NMR (CDCl3, 101MHz) spectra of spectra of 9w

Supplementary Figure 118. HPLC spectra of 9w

Supplementary Figure 119. 1H NMR (CDCl3, 400MHz) spectra of 9x

Supplementary Figure 120. 13C NMR (CDCl3, 101MHz) spectra of spectra of 9x

Supplementary Figure 121. HPLC spectra of 9x

Supplementary Figure 122. 1H NMR (CDCl3, 400MHz) spectra of 9y

Supplementary Figure 123. 13C NMR (CDCl3, 101MHz) spectra of spectra of 9y

Supplementary Figure 124. HPLC spectra of 9y

Supplementary Figure 125. 1H NMR (CDCl3, 400MHz) spectra of 9z

Supplementary Figure 126. 13C NMR (CDCl3, 101MHz) spectra of spectra of 9z

Supplementary Figure 127. HPLC spectra of 9z

Supplementary Figure 128. 1H NMR (CDCl3, 400MHz) spectra of 9aa

Supplementary Figure 129. 13C NMR (CDCl3, 101MHz) spectra of spectra of 9aa

Supplementary Figure 130. HPLC spectra of 9aa

Supplementary Figure 131. 1H NMR (CDCl3, 400MHz) spectra of 9ab

Supplementary Figure 132. 13C NMR (CDCl3, 101MHz) spectra of spectra of 9ab

Supplementary Figure 133. HPLC spectra of 9ab

Supplementary Figure 134. 1H NMR (CDCl3, 400MHz) spectra of 9ac

Supplementary Figure 135. 13C NMR (CDCl3, 101MHz) spectra of spectra of 9ac

Supplementary Figure 136. HPLC spectra of 9ac

Supplementary Figure 137. 1H NMR (CDCl3, 400MHz) spectra of 9ad

Supplementary Figure 138. 13C NMR (CDCl3, 101MHz) spectra of spectra of 9ad

Supplementary Figure 139. HPLC spectra of 9ad

Supplementary Figure 140. 1H NMR (CDCl3, 400MHz) spectra of 9ae

Supplementary Figure 141. 13C NMR (CDCl3, 101MHz) spectra of spectra of 9ae

Supplementary Figure 142. HPLC spectra of 9ae

Supplementary Figure 143. 1H NMR (CDCl3, 400MHz) spectra of 9f

Supplementary Figure 144. 13C NMR (CDCl3, 101MHz) spectra of spectra of 9f

Supplementary Figure 145. HPLC spectra of 9af

Supplementary Figure 146. 1H NMR (CDCl3, 400MHz) spectra of 10a

Supplementary Figure 147. 13C NMR (CDCl3, 101MHz) spectra of spectra of 10a

Supplementary Figure 148. HPLC spectra of 10a

Supplementary Figure 149. 1H NMR (CDCl3, 400MHz) spectra of S20

Supplementary Figure 150. 13C NMR (CDCl3, 101MHz) spectra of spectra of S20

Supplementary Figure 151. HPLC spectra of S20

Supplementary Figure 152. 1H NMR (CDCl3, 400MHz) spectra of S21

Supplementary Figure 153. 13C NMR (CDCl3, 101MHz) spectra of spectra of S21

Supplementary Figure 154. HPLC spectra of S21

Supplementary Figure 155. 1H NMR (CDCl3, 400MHz) spectra of 10b

Supplementary Figure 156. 13C NMR (CDCl3, 101MHz) spectra of spectra of 10b

Supplementary Figure 157. HPLC spectra of 10b

Supplementary Figure 158. 1H NMR (CDCl3, 400MHz) spectra of 11a

Supplementary Figure 159. 13C NMR (CDCl3, 101MHz) spectra of spectra of 11a

Supplementary Figure 160. HPLC spectra of 11a

Supplementary Figure 161. 1H NMR (CDCl3, 400MHz) spectra of 11b

Supplementary Figure 162. 13C NMR (CDCl3, 101MHz) spectra of spectra of 11b

Supplementary Figure 163. HPLC spectra of 11b

Supplementary Figure 164. 1H NMR (CDCl3, 400MHz) spectra of 11c

Supplementary Figure 165. 13C NMR (CDCl3, 101MHz) spectra of spectra of 11c

Supplementary Figure 166. 1H NMR (CDCl3, 400MHz) spectra of 12

Supplementary Figure 167. 13C NMR (CDCl3, 101MHz) spectra of spectra of 12

Supplementary Figure 168. HPLC spectra of 12

Supplementary Figure 169. 1H NMR (CDCl3, 400MHz) spectra of S22

Supplementary Figure 170. 13C NMR (CDCl3, 101MHz) spectra of spectra of S22

Supplementary Figure 171. HPLC spectra of S22

Supplementary Figure 172. 1H NMR (CDCl3, 400MHz) spectra of 13

Supplementary Figure 173. 13C NMR (CDCl3, 101MHz) spectra of spectra of 13

Supplementary Figure 174. HPLC spectra of 13

Supplementary Figure 175. 1H NMR (CDCl3, 400MHz) spectra of 14

Supplementary Figure 176. 13C NMR (CDCl3, 101MHz) spectra of spectra of 14

Supplementary Figure 177. HPLC spectra of 14

Supplementary Figure 178. 1H NMR (CDCl3, 400MHz) spectra of 15

Supplementary Figure 179. 13C NMR (CDCl3, 101MHz) spectra of spectra of 15

Supplementary Figure 180. HPLC spectra of 15

## **2. Supplementary Methods**

### 2.1 General Information

All reactions were conducted in flame-dried or oven-dried glassware under an atmosphere of dry nitrogen or argon. Oxygen and/or moisture sensitive solids and liquids were transferred appropriately. Concentration of solutions in vacuo was accomplished using a rotary evaporator fitted with a water aspirator. Residual solvents were removed under high vacuum (0.1-0.2 mm Hg). All commercially available materials purchased form TCI or Sigma Aldrich was used as received. All reaction solvents were purified before use: Tetrahydrofuran were distilled from Na/benzophenone. Toluene was distilled over molten sodium metal. Dichloromethane, dimethylformamide, diethylamine, triethylamine and diisoproylethylamine were distilled from CaH2. Methanol was distilled from Mg/I2. Flash column chromatography was performed using silica gel (230 – 400 mesh). TLC was carried out using pre-coated sheets (Yantai silica gel 60-F250, 0.2 mm). Compounds were visualized with UV light, iodine, *p*-anisaldehyde stain, ceric ammonium molybdate stain, or phosphomolybdic acid in EtOH.

Proton nuclear magnetic resonance (1H NMR) spectra were recorded with Bruker BBFO 400 MHz, Bruker Avance 400 MHz or Bruker Avance 500 MHz spectrometers. Chemical shifts are reported in delta (δ) units, parts per million (ppm) downfield from tetramethylsilane or ppm relative to the center of the singlet at 7.26 ppm for deuteriochloroform. The following abbreviations are used to describe spin multiplicity: s = singlet, d = doublet, t = triplet, q = quartet, qn = quintet, m = multiplet, br = broad, dd = doublet of doublets, dt = doublet of triplets, dq = doublet of quartets, ddd = doublet of doublet of doublets; other combinations are derived from those listed above. Integration and coupling constants were reported in Hertz (Hz). Coupling constants (*J*) are reported in Hertz (Hz) for corresponding solutions. Carbon-13 nuclear magnetic resonance (13C NMR) spectra were recorded with a 101 MHz or a 126 MHz spectrometer and were routinely run with broadband decoupling. Chemical shifts are reported in delta (δ) units, ppm relative to the center of the triplet at 77.16 ppm for deuteriochloroform. High-resolution mass spectra (HRMS) were obtained on Finnigan MAT 95 XP mass spectrometer (Thermo Electron Corporation) and are reported as m/z (relative intensity). Accurate masses are reported for the molecular ion (M+H+, M+Na+), or a suitable fragment ion. Optical rotations were measured using a 1 mL cell with a 1 dm path length on a Jasco P-1030 polarimeter and data were reported as follow: optical rotation (cin g per 100 mL solvent). The determination of *e.r.* was performed via chiral HPLC analysis using Shimadzu LC-20AD HPLC workstation.

### 2.2 Preparation of the NHC Pre-catalysts

NHC pre-catalysts **A**-**D** are known compounds in literature reports.1-4 NHC pre-catalyst **E** are prepared according to the following procedures:

To a solution of compound **S1** (5.0 g, 26.4 mmol) in DCM (100 mL) was added trimethyloxonium tetrafluoroborate (4.7 g, 31.7 mmol) portionwise at room temperature. The mixture was stirred for 24 h at room temperature. The reaction was quenched with a saturated aquous solution of NaHCO3 (100 mL) at 0 °C, and the mixture was extracted with DCM (100 mL x 3). The combined organic phases were washed sequentially with a saturated aquous solution of NaHCO3 (50 mL), water (50 mL) and brine (50 mL), dried over anhydrous Na2SO4 and concentrated in *vacuo* to provide the crude **S2.** To a solution of the above **S2** and hydrazine chloride **S3**5 (10.3 g, 26.4 mmol) in anhydrous MeOH (100 mL) was added HCl (4.0 M in dioxane, 0.7 mL, 2.8 mmol) at room temperature. The resulting mixture was heated to 60 °C for 36 h. After cooled to room temperature, the reaction mixture was directly concentrated in *vacuo* to provide the crude **S4.** To a sealed tube equipped with a magnetic stir bar was added the crude hydrazine **S4**, chlorobenzene (27 mL, 264 mmol), triethyl orthoformate (39 mL, 264 mmol) and HCl (4.0 M in dioxane, 7 mL, 28 mmol). The tube was sealed and heated to 120 °C for 2 h. After cooled to room temperature, the reaction mixture was directly concentrated in *vacuo,* and the residue was purified by flash chromatography on silica gel (EtOAc/hexanes =1:5) to provide NHC pre-catalyst **E** (7.3 g, 48% yield for 3 steps) as a light yellow solid.

**1H NMR** (400 MHz, CDCl3) δ 12.04 (s, 1H), 7.55 (d, *J* = 7.4 Hz, 1H), 7.39 – 7.26 (m, 3H), 7.14 (s, 1H), 7.07 (s, 1H), 6.88 (d, *J* = 4.0 Hz, 1H), 5.14 – 4.97 (m, 3H), 3.30 (dd, *J* = 17.0, 4.6 Hz, 1H), 3.19 (d, *J* = 17.0 Hz, 1H), 2.62 – 2.48 (m, 1H), 2.31 – 2.08 (m, 2H), 2.03 – 0.83 (m, 30H) ppm.

**13C NMR** (101 MHz, CDCl3) δ 152.3, 149.1, 145.6, 145.5, 144.0, 139.9, 136.1, 129.7, 128.7, 128.1, 125.6, 124.2, 123.4, 77.8, 62.4, 60.3, 45.1, 39.9, 39.1, 37.6, 35.3, 35.3, 34.4, 34.4, 33.7, 26.9, 26.8, 26.6, 26.5, 26.2, 26.1, 26.0, 25.8 ppm.

**HRMS** (ESI, m/z): calculated for C36H46N3O+: 536.3641 (M-Cl-)+, found: 536.3639.

**[α]21D** = +57.3 (c = 0.5 in MeOH).

**M.P.** 191 ℃ - 193 ℃

### 2.3 Preparation of the Sulfinic Acids

Benzenesulfinic acid and *p*-toluenesulfinic acid were obtained by acidification of the commercially available sodium benzenesulfinate and sodium *p*-toluenesulfinate, and then the mixture was extracted by Et2O. After being dried by Na2SO4, the solvent was removed under vacuum at room temperature to provide the corresponding sulfinic acids which were directly used in the catalytic reaction without further purification.6,7

Other arylsulfinic acids, heteroaromatic and aliphatic sulfinic acids were prepared according to the following procedures:8,9 arylsulfonyl chloride (10 mmol) and anhydrous sodium sulfite (30 mmol) were dissolved in 20 mL water. The reaction mixture was heated to 75 °C, and stirred for additional 5 h at 75 °C. After the reaction was complete, the mixture was transferred to separation funnel and washed with chloroform. The aqueous phase was acidified with 12 *N* HCl aq. (1.5 mL) at 0 °C and then extracted by Et2O. After being dried by Na2SO4, the organic solvent was removed under vacuum at room temperature to provide the corresponding sulfinic acids which were directly used in the catalytic reaction without further purification.

### 2.4 Preparation of the Ynals

Ynals **1a**, **1m-n**, **1u-x**, **1ae-af** were prepared according to literature.10 The other ynals were prepared according to the following procedures.

General Procedure **A**:

To a stirred solution of sulfuric acid (98%, 1.5 eq.) in methanol (0.2 M) was added **S5** (1.0 eq.), KI (1.0 eq.), and H2O2 (35%, 2.0 eq.) at 0 °C. The mixture was stirred at 0 °C for an additional 12 h. The reaction was quenched by adding excess saturated aqueous solution of Na2S2O3. The methanol was evaporated, and the residue was extracted with EtOAc for three times. The combined organic phases were washed sequentially with water and brine, dried over anhydrous Na2SO4 and concentrated in *vacuo* to afford the product **S6** which was directly used for the next step without further purification.

To a solution of the crude **S6** (1.0 eq.) in anhydrous acetone (0.2 M) was added K2CO3 (3.0 eq.) and dimethyl sulfate (2.0 eq.) at room temperature. The resulting mixture was stirred at 60 °C for an additional 10 h, and then filtrated through a pad of silica gel, washed with EtOAc/hexanes =1:3. The combined filtrate was concentrated in *vacuo* to afford the product **S7** which was directly used for the next step without further purification.

General Procedure **B**:

To a solution of **S8** (1.0 eq.) and propargyl alcohol (5.0 eq.) in triethylamine (0.2 M) was added PdCl2(PPh3)2 (5 mol%) and CuI (10 mol%) at room temperature. The flask was flushed with nitrogen gas. The resulting mixture was stirred at 40 °C for 20 h. The reaction mixture was filtered and washed with EtOAc/hexanes =1:1. The combined filtrate was concentrated in *vacuo* to provide the crude alcohol **S9** which was directly used for the next step without further purification.

To a solution of **S9** (1.0 eq.) in DCM (0.5 M) was added NaHCO3 (3.0 eq.), and Dess-Martin periodinane (1.3 eq.) at 0 °C. The resulting mixture was stirred at room temperature for 15 min. The reaction was quenched by adding excess saturated aqueous solution of Na2SO3, and the mixture was extracted with EtOAc for three times. The combined organic phases were washed sequentially with water and brine, dried over anhydrous Na2SO4 and concentrated in *vacuo*. The residue was purified by flash chromatography on silica gel to provide aldehyde **S10**.

Aldehyde **1o** wasprepared from the corresponding aryl iodide11 according to General Procedure **B**.

**1H NMR** (400 MHz, CDCl3) δ 9.61 (s, 1H), 8.24 (dd, *J* = 8.4, 1.1 Hz, 1H), 7.92 (d, *J* = 9.1 Hz, 1H), 7.82 – 7.78 (m, 1H), 7.63 – 7.57 (m, 1H), 7.47 – 7.40 (m, 2H), 5.40 (s, 2H), 3.57 (s, 3H) ppm.

**13C NMR** (101 MHz, CDCl3) δ 176.8, 160.1, 134. 8, 133.9, 129.0, 128.5, 128.5, 125.3, 125.0, 115.5, 104.0, 98.2, 95.2, 90.9, 56.7 ppm.

**M.P.** 52 ℃ - 53 ℃

**HRMS** (ESI, m/z): calculated for C15H12O3Na+: 263.0684 (M+Na)+, found: 263.0685.

To a solution of aldehyde **S11**12 (1.95 g, 6.9 mmol) in *t*BuOH (30 mL) was added 2-methyl-2-butene (12 mL, 142.8 mmol), followed by addition of a solution of KH2PO4 (4.6 g, 33.8 mmol) and NaClO2 (80%, 1.9 g, 16.8 mmol) in H2O (10 mL) at 0 ℃. The reaction mixture was slowly warmed to room temperature and stirred for an additional 1 h. The mixture was diluted with brine (10 mL) and extracted with EtOAc (100 mL x 3). The combined organic phases were washed with brine (10 mL x 3), dried over anhydrous Na2SO4 and concentrated in *vacuo* to afford the corresponding acid. The acid was dissloved in methanol (20 mL) and cooled to 0 ℃. Then thionyl chloride (1.5 mL, 20.7 mmol) was added dropwise. The resulting mixture was warmed to room temperature and stirred for an additional 10 h. The mixture was concentrated in *vacuo* and the residue was purified by flash chromatography on silica gel (EtOAc/hexanes =1:5) to provide **S12** (1.68 g, 78%) as a yellow solid.

**1H NMR** (400 MHz, CDCl3) δ 8.33 (d, *J* = 8.9 Hz, 1H), 7.80 (d, *J* = 8.4 Hz, 1H), 7.74 (dd, *J* = 7.8, 1.5 Hz, 1H), 7.63 – 7.49 (m, 3H), 4.01 (s, 3H) ppm.

**13C NMR** (101 MHz, CDCl3) δ 169.0, 136.8, 134.8, 134.4, 134.1, 129.0, 128.5, 128.4, 128.0, 125.5, 100.5, 52.8 ppm.

**HRMS** (ESI, m/z): calculated for C12H9IO2Na+: 334.9545 (M+Na)+, found: 334.9543.

Aldehyde **1p** was prepared from iodide **S12** according to General Procedure **B**.

**1H NMR** (400 MHz, CDCl3) δ 9.62 (s, 1H), 8.43 – 8.37 (m, 1H), 7.96 (d, *J* = 8.7 Hz, 1H), 7.91 (d, *J* = 8.7 Hz, 1H), 7.86 – 7.80 (m, 1H), 7.65 – 7.55 (m, 2H), 3.98 (s, 3H) ppm.

**13C NMR** (101 MHz, CDCl3) δ 176.8, 166.1, 134.3, 133.5, 132.7, 131.1, 128.8, 128.5, 128.4, 126.9, 125.8, 118.4, 97.8, 90.9, 52.6 ppm.

**M.P.** 87 ℃ - 88 ℃

**HRMS** (ESI, m/z): calculated for C15H10O3H+: 239.0708 (M+H)+, found: 239.0708.

Aldehyde **1q** was prepared from the corresponding aryl iodide12 according to General Procedure **B**.

**1H NMR** (400 MHz, CDCl3) δ 9.61 (s, 1H), 8.38 (dd, *J* = 8.4, 1.2 Hz, 1H), 8.00 (d, *J* = 8.6 Hz, 1H), 7.88 (d, *J* = 7.5 Hz, 1H), 7.72 (d, *J* = 8.6 Hz, 1H), 7.65 (ddd, *J* = 8.4, 6.8, 1.4 Hz, 1H), 7.58 (ddd, *J* = 8.2, 6.9, 1.3 Hz, 1H), 6.41 (s, 1H), 4.32 – 4.19 (m, 2H), 4.21 – 4.08 (m, 2H) ppm.

**13C NMR** (101 MHz, CDCl3) δ 176.5, 141.5, 133.7, 133.4, 132.1, 128.6, 128.2, 127.6, 126.0, 123.4, 116.4, 102.0, 97.8, 90.0, 66.0 ppm.

**HRMS** (ESI, m/z): calculated for C16H12O3H+: 253.0865 (M+Na)+, found: 253.0866.

Aldehyde **1r** was prepared from 2,3-dihydroxynaphthalene according to General Procedures **A** and **B** sequentially.

**1H NMR** (400 MHz, CDCl3) δ 9.60 (s, 1H), 8.19 – 8.13 (m, 1H), 7.76 – 7.70 (m, 1H), 7.52 – 7.43 (m, 2H), 7.31 (s, 1H), 4.11 (s, 3H), 4.00 (s, 3H) ppm.

**13C NMR** (101 MHz, CDCl3) δ 176.7, 155.0, 151.6, 130.6, 129.4, 127.1, 126.5, 125.9, 125.1, 111.6, 109.3, 97.3, 90.1, 62.1, 56.1 ppm.

**M.P.** 84 ℃ - 85 ℃

**HRMS** (ESI, m/z): calculated for C15H12O3H+: 241.0865 (M+H)+, found: 241.0863.

Aldehyde **1s** was prepared from 3-bromo-2-naphthol according to General Procedures **A** and **B** sequentially.

**1H NMR** (400 MHz, CDCl3) δ 9.60 (s, 1H), 8.22 – 8.14 (m, 2H), 7.75 – 7.68 (m, 1H), 7.65 – 7.56 (m, 1H), 7.54 – 7.45 (m, 1H), 4.13 (s, 2H) ppm.

**13C NMR** (101 MHz, CDCl3) δ 176.4, 159.6, 136.3, 133.8, 130.7, 128.5, 127.5, 126.9, 125.3, 116.5, 110.0, 97.8, 88.8, 62.5 ppm.

**M.P.** 79 ℃ - 80 ℃

**HRMS** (ESI, m/z): calculated for C14H9BrO2H+: 288.9864 (M+H)+, found: 288.9861.

Aldehyde **1t** was prepared from 2,6-dihydroxynaphthalene according to General Procedures **A** and **B** sequentially.

**1H NMR** (400 MHz, CDCl3) δ 9.57 (s, 1H), 8.10 (d, *J* = 9.1 Hz, 1H), 7.83 (d, *J* = 9.1 Hz, 1H), 7.25 (dd, *J* = 9.1, 2.7 Hz, 1H), 7.19 (d, *J* = 9.1 Hz, 1H), 7.08 (d, *J* = 2.6 Hz, 1H), 4.01 (s, 3H), 3.89 (s, 3H) ppm.

**13C NMR** (101 MHz, CDCl3) δ 176.8, 160.7, 156.9, 132.8, 130.2, 129.4, 126.3, 121.3, 112.7, 106.6, 102.4, 98.3, 91.5, 56.7, 55.5 ppm.

**M.P.** 120 ℃ - 121 ℃.

**HRMS** (ESI, m/z): calculated for C15H12O3H+: 241.0865 (M+H)+, found: 241.0862.

To a solution of aldehyde **S13** (1.0 g, 3.2 mmol) in ethanol (10 mL) was added 30% KOH aq. (10 mL) and H2O2 (35%, 10 mL) at room temperature. The reaction mixture was heated to 80 ℃ for 12 h. After cooled to 0 ℃, the mixture was acidified to pH=3 with 2.0 N HCl aq. and then extracted with EtOAc (100 mL x 3). The combined organic phases were washed with brine (10 mL), dried over anhydrous Na2SO4 and concentrated in *vacuo* to afford the corresponding acid. The acid was dissloved in methanol (10 mL) and cooled to 0 ℃. Then thionyl chloride (0.7 mL, 9.6 mmol) was added dropwise. The resulting mixture was warmed to room temperature and stirred for an additional 10 h. The mixture was concentrated in *vacuo* and the residue was purified by flash chromatography on silica gel (EtOAc/hexanes =1:3) to provide **S14** (645.7 mg, 59%) as a yellow solid.

**1H NMR** (500 MHz, CDCl3) δ 8.42 (d, *J* = 1.7 Hz, 1H), 8.11 (d, *J* = 8.9 Hz, 1H), 8.03 (dd, *J* = 8.9, 1.7 Hz, 1H), 7.84 (d, *J* = 8.9 Hz, 1H), 7.17 (d, *J* = 8.9 Hz, 1H), 4.00 (s, 3H), 3.96 (s, 3H) ppm.

**13C NMR** (126 MHz, CDCl3) δ 166.9, 158.4, 137.9, 131.9, 131.4, 131.4, 128.7, 127.4, 125.8, 113.3, 87.3, 57.2, 52.3 ppm.

**HRMS** (ESI, m/z): calculated for C13H11IO3H+: 342.9831 (M+H)+, found: 342.9828.

Aldehyde **1y** was prepared from iodide **S10** according to General Procedure **B**.

**1H NMR** (400 MHz, CDCl3) δ 9.60 (s, 1H), 8.56 (d, *J* = 1.7 Hz, 1H), 8.24 (d, *J* = 8.8 Hz, 1H), 8.15 (dd, *J* = 8.8, 1.7 Hz, 1H), 8.07 (d, *J* = 9.2 Hz, 1H), 7.32 (d, *J* = 9.2 Hz, 1H), 4.09 (s, 3H), 3.98 (s, 3H) ppm.

**13C NMR** (101 MHz, CDCl3) δ 176.7, 166.9, 163.7, 137.5, 135.4, 131.6, 128.0, 127.4, 126.6, 125.2, 113.0, 102.6, 98.5, 90.2, 56.8, 52.5 ppm.

**HRMS** (ESI, m/z): calculated for C16H12O4H+: 269.0814 (M+H)+, found: 269.0813.

Aldehyde **1z** was prepared from 2,7-dihydroxynaphthalene according to General Procedures **A** and **B** sequentially.

**1H NMR** (400 MHz, CDCl3) δ 9.58 (s, 1H), 7.81 (d, *J* = 9.1 Hz, 1H), 7.63 (d, *J* = 8.9 Hz, 1H), 7.43 (d, *J* = 2.5 Hz, 1H), 7.05 – 6.98 (m, 2H), 4.00 (s, 3H), 3.94 (s, 3H) ppm.

**13C NMR** (101 MHz, CDCl3) δ 176.6, 162.8, 160.1, 137.0, 133.9, 130.1, 123.7, 117.5, 109.2, 103.2, 101.0, 99.0, 91.8, 56.4, 55.5 ppm.

**M.P.** 99 ℃ - 100 ℃.

**HRMS** (ESI, m/z): calculated for C15H12O3H+: 241.0865 (M+H)+, found: 241.0864.

Aldehyde **1aa** was prepared from 2-bromo-7-hydroxynaphthalene according to General Procedures **A** and **B** sequentially.

**1H NMR** (500 MHz, CDCl3) δ 9.60 (s, 1H), 8.33 (d, *J* = 1.9 Hz, 1H), 7.91 (d, *J* = 9.1 Hz, 1H), 7.65 (d, *J* = 8.6 Hz, 1H), 7.48 (dd, *J* = 8.7, 1.9 Hz, 1H), 7.25 (d, *J* = 9.3 Hz, 1H), 4.06 (s, 3H) ppm.

**13C NMR** (126 MHz, CDCl3) δ 176.7, 162.8, 136.1, 134.0, 130.1, 128.5, 127.0, 126.8, 123.6, 112.5, 101.6, 98.6, 90.2, 56.7 ppm.

**M.P.** 136 ℃ - 137 ℃.

**HRMS** (ESI, m/z): calculated for C14H9BrO2H+: 288.9864 (M+H)+, found: 288.9859.

Aldehyde **1ab** was prepared from 3-hydroxyquinoline according to General Procedures **A** and **B** sequentially.

**1H NMR** (400 MHz, CDCl3) δ 9.56 (s, 1H), 8.80 (s, 1H), 8.11 – 7.98 (m, 2H), 7.64 – 7.52 (m, 2H), 4.14 (s, 3H) ppm.

**13C NMR** (101 MHz, CDCl3) δ 176.3, 154.6, 143.4, 138.4, 129.9, 128.9, 127.9, 124.5, 109.7, 99.2, 86.5, 57.5 ppm.

**M.P.** 112 ℃ - 113 ℃.

**HRMS** (ESI, m/z): calculated for C13H9NO2H+: 212.0712 (M+H)+, found: 212.0717.

To a solution of **S15** (1.0 g, 5.7 mmol) in ethanol (10 ml) was added thionyl chloride (2.1 mL, 28.5 mmol) dropwise at 0 ℃. The resulting mixture was warmed to room temperature and stirred for an additional 10 h. The mixture was concentrated in *vacuo* to afford the corresponding ester which was redissolved in DMF (4.5 ml). To this solution was added KOH (1.2 g, 21.1 mmol) at room temperature. After 15 min, a solution of iodine (1.4 g, 5.7 mmol) in DMF (4.5 mL) was added dropwise at room temperature. The resulting mixture was stirred for an additional 45 min and then poured into a cold solution of Na2S2O3. The precipitate was filterated and dried in *vacuo* to give a yellow solid. The solid was redissolved in THF (30 mL). Then Boc2O (1.4 mL, 6.1 mmol) and DMAP (6.7 mg, 0.06 mmol) were added at room temperature. The mixture was stirred for an additional 2 h before being concentated in *vacuo*. The residue was purified by flash chromatography on silica gel (EtOAc/hexanes =1:10) to provide **S16** (1.6 g, 67%) as a yellow solid.

**1H NMR** (400 MHz, CDCl3) δ 8.06 (d, *J* = 8.5 Hz, 1H), 7.26 (dd, *J* = 8.5, 7.3 Hz, 1H), 7.03 (d, *J* = 7.3 Hz, 0H), 4.45 (q, *J* = 7.2 Hz, 2H), 2.88 (s, 3H), 1.62 (s, 9H), 1.44 (t, *J* = 7.2 Hz, 3H) ppm.

**13C NMR** (101 MHz, CDCl3) δ 162.9, 148.2, 136.0, 133.5, 132.7, 126.7, 126.5, 126.2, 113.4, 85.5, 66.1, 62.2, 28.0, 20.1, 14.3 ppm.

**HRMS** (ESI, m/z): calculated for C17H20INO4Na+: 452.0335 (M+Na)+, found: 452.0334.

Aldehyde **1ac** was prepared from iodide **S16** according to General Procedure **B.**

**1H NMR** (400 MHz, CDCl3) δ 9.43 (s, 1H), 7.94 (d, *J* = 8.5 Hz, 1H), 7.36 – 7.27 (m, 1H), 7.06 (d, *J* = 7.3 Hz, 1H), 4.48 (q, *J* = 7.2 Hz, 2H), 2.76 (s, 3H), 1.63 (s, 9H), 1.46 (t, *J* = 7.1 Hz, 3H) ppm.

**13C NMR** (101 MHz, CDCl3) δ 176.0, 160.9, 148.0, 137.2, 135.8, 132.9, 127.4, 125.9, 125.9, 112.9, 102.7, 94.6, 89.0, 86.3, 62.5, 27.8, 19.0, 14.3 ppm.

**M.P.** 106 ℃ - 107 ℃.

**HRMS** (ESI, m/z): calculated for C20H21NO5Na+: 378.1317 (M+Na)+, found: 378.1317.

To a solution of **S17** (1.0 g, 3.7 mmol) in EtOAc (15 mL) was added H2SO4 (98%, 0.6 mL, 11.1 mmol), DMSO (1.6 mL, 22.2 mmol) and NH4I (1.1g, 7.4 mmol) at room temperature. The mixture was heated to 80 °C and stirred for 20 h. The reaction was quenched by adding excess saturated aqueous solution of Na2S2O3 at0 °C. The mixture was extracted with EtOAc (50 mL x 3). The combined organic phases were washed sequentially with water (20 mL) and brine (20 mL), dried over anhydrous Na2SO4 and concentrated in *vacuo* to afford crude iodide **S18** (1.3 g, 88%) which was directly used for the next step without further purification. **S18** was further converted to aldehyde **1ad** according to General Procedure **B**.

**1H NMR** (400 MHz, CDCl3) δ 9.49 (s, 1H), 7.88 – 7.78 (m, 3H), 7.26 (d, *J* = 2.2 Hz, 1H), 7.08 (dd, *J* = 8.8, 2.3 Hz, 1H), 7.04 – 6.98 (m, 2H), 3.89 (s, 3H), 3.88 (s, 3H) ppm.

**13C NMR** (101 MHz, CDCl3) δ 176.4, 160.9, 158.5, 152.3, 138.5, 134.6, 129.9, 125.7, 123.7, 115.4, 114.6, 108.6, 105.0, 93.9, 91.1, 55.8, 55.6 ppm.

**M.P.** 131 ℃ - 132 ℃

**HRMS** (ESI, m/z): calculated for C19H14O3SH+: 323.0742 (M+H)+, found: 323.0738.

## **3. Supplementary Results of Condition Optimization**

**Supplementary Table 1.** Preliminary Screening of Nucleophiles[a]

| Entry | NuH | Yield[b] |
| --- | --- | --- |
| 1 |  | trace |
| 2 |  | NP |
| 3 |  | NP |
| 4 | PhSO2H | 20% |
| 5 | PhSO2Na | trace |
| 6 | Ph2P(O)H | NP |
| 8 | Ph2PH | NP |

[a] Reaction conditions: **1a** (0.05 mmol), **NuH** (0.1 mmol), NHC precatalyst (20 mol%), K2CO3 (0.15 mmol), DQ (0.1 mmol), *i*PrOH (0.055 mmol), CH2Cl2 (1 mL), and 4 Å molecular sieve (100 mg), room temperature, 12 h. [b] Estimated via 1H NMR analysis of the crude reaction mixture with 1,1,2,2-tetrachloroethane as an internal standard. NP = no desired product.

**Supplementary Table 2.** Screening of Solvents[a]

| Entry | Solvent | Yield[b] | *e.r.*[c] | *E*/*Z*[d] |
| --- | --- | --- | --- | --- |
| 1 | CH2Cl2 | 37% | 65:35 | >20:1 |
| 2 | DCE | 41% | 66:34 | >20:1 |
| 3 | CHCl3 | NP | - | - |
| 4 | THF | NP | - | - |
| 5 | DME | NP | - | - |
| 6 | MeCN | NP | - | - |
| 7 | toluene | 27% | 64:36 | >20:1 |
| 8 | Et2O | 42% | 70:30 | >20:1 |

[a] Reaction conditions: **1a** (0.05 mmol), **2a** (0.1 mmol), NHC precatalyst **A** (20 mol%), K2CO3 (0.15 mmol), DQ (0.1 mmol), *i*PrOH (0.055 mmol), solvent (1 mL), and 4 Å molecular sieve (100 mg), room temperature, 12 h. [b] Estimated via 1H NMR analysis of the crude reaction mixture with 1,1,2,2-tetrachloroethane as an internal standard. [c] Determined via HPLC on a chiral stationary phase. [d] Determined via 1H NMR analysis of the crude reaction mixture. Mes = 2,4,6-trimethylphenyl. DCE = 1,2-dichloroethane.

**Supplementary Table 3.** Screening of Bases[a]

| Entry | Base | Yield[b] | *e.r.* [c] | *E*/*Z*[d] |
| --- | --- | --- | --- | --- |
| 1 | Cs2CO3 | trace | - | - |
| 2 | Na2CO3 | 24% | 72:28 | >20:1 |
| 3 | K3PO4 | trace | - | - |
| 4 | KOAc | 40% | 75:25 | >20:1 |
| 5 | NaOAc | 54% | 78:22 | >20:1 |
| 6 | DIPEA | trace | - | - |
| 7 | DBU | trace | - | - |
| 8 | DMAP | NP | - | - |

[a] Reaction conditions: **1a** (0.05 mmol), **2a** (0.1 mmol), NHC precatalyst **A** (20 mol%), base (0.15 mmol), DQ (0.1 mmol), *i*PrOH (0.055 mmol), Et2O(1 mL), and 4 Å molecular sieve (100 mg), room temperature, 12 h. [b] Estimated via 1H NMR analysis of the crude reaction mixture with 1,1,2,2-tetrachloroethane as an internal standard. [c] Determined via HPLC on a chiral stationary phase. [d] Determined via 1H NMR analysis of the crude reaction mixture. Mes = 2,4,6-trimethylphenyl. DIPEA = *N*, *N*-Diisopropylethylamine. DBU = 1,8-diazabicyclo[5.4.0]undec-7-ene. DMAP = 4-dimethylaminopyridine

**Supplementary Table 4.** Screening of NHC Pre-catalysts[a]

| Entry | NHC | Yield[b] | *e.r.* [c] | *E*/*Z*[d] |
| --- | --- | --- | --- | --- |
| 1 | *ent*-**A** | 54 | 22:78 | >20:1 |
| 2 | B | 40 | 78:22 | >20:1 |
| 3 | C | NP | - | - |
| 4 | D | 37% | 85:15 | >20:1 |
| 5 | E | 40% | 87:13 | >20:1 |
| 6 | F | 22% | 83:17 | >20:1 |
| 7 | G | 29% | 60:40 | >20:1 |
| 8 | H | 10% | 76:24 | >20:1 |
| 9 | I | 63% | 52:48 | >20:1 |

[a] Reaction conditions: **1a** (0.05 mmol), **2a** (0.1 mmol), NHC precatalyst (20 mol%), NaOAc (0.15 mmol), DQ (0.1 mmol), *i*PrOH (0.055 mmol), Et2O(1 mL), and 4 Å molecular sieve (100 mg), room temperature, 12 h. [b] Estimated via 1H NMR analysis of the crude reaction mixture with 1,1,2,2-tetrachloroethane as an internal standard. [c] Determined via HPLC on a chiral stationary phase. [d] Determined via 1H NMR analysis of the crude reaction mixture. Mes = 2,4,6-trimethylphenyl.

## **4. Proposed Reaction Mechanism**

The proposed reaction mechanism is described in Supplementary Fig. 181. The free NHC catalyst was generated in situ from the pre-catalyst **E** after deprotonation, and then reacted with the ynal substrate (**1**) to afford the Breslow intermediate **I**. The Breslow intermediate **I** was further oxidized by DQ to give acetylenic acylazolium intermediate **II**, which then reacted with in situ generated sulfinic anion via a thio-Michael addition process to provide the allenolate **III**. *E*-Selective protonation of the allenolate **III** gave rise to the acylazolium intermediate **IV**, which was then trapped by a hard nucleophile (alcohol or phenol) to afford the corresponding axially chiral styrene (**3** to **9**) and release the NHC catalyst for additional catalytic cycles.

**Supplementary Figure 181**. Proposed Reaction Mechanism

## **5. Supplementary Data of the Products**

### 5.1 Characterization of the Axially Chiral Styrenes

Light yellow oil, 48% yield, *E*/*Z* >20:1.

**1H NMR** (500 MHz, CDCl3) δ 7.85 (d, *J* = 9.0 Hz, 1H), 7.73 (d, *J* = 8.1 Hz, 1H), 7.61 – 7.56 (m, 2H), 7.56 – 7.50 (m, 2H), 7.48 (s, 1H), 7.38 – 7.33 (m, 3H), 7.30 (ddd, *J* = 8.0, 6.8, 1.2 Hz, 1H), 7.02 (d, *J* = 9.1 Hz, 1H), 4.73 – 4.62 (m, 1H), 3.34 (s, 3H), 0.73 (d, *J* = 6.2 Hz, 3H), 0.65 (d, *J* = 6.2 Hz, 3H) ppm.

**13C NMR** (126 MHz, CDCl3) δ 163.2, 154.3, 151.2, 138.4, 133.7, 133.1, 131.8, 131.7, 129.6, 128.5, 127.8, 127.2, 124.8, 124.0, 113.0, 111.8, 68.7, 55.7, 21.2, 21.1 ppm.

**HRMS** (ESI, m/z): calculated for C23H22O5SH+: 411.1266 (M+H)+, found: 411.1263.

**[α]21D** = -27.5 (c = 0.6 in CHCl3).

**HPLC analysis**: 91:9 *e.r.* (CHIRALPAK AD-H column, *i*PrOH/Hexane = 20:80, 0.5 mL/min, λ = 254 nm, tmajor = 14.1 min, tminor= 19.5 min).

Light yellow solid, 90% yield, *E*/*Z* 20:1.

**1H NMR** (500 MHz, CDCl3) δ 7.85 (d, *J* = 9.1 Hz, 1H), 7.77 – 7.72 (m, 2H), 7.65 – 7.58 (m, 3H), 7.58 – 7.53 (m, 1H), 7.42 – 7.35 (m, 3H), 7.32 (ddd, *J* = 8.0, 6.8, 1.2 Hz, 1H), 7.21 – 7.15 (m, 2H), 7.11 – 7.05 (m, 1H), 7.02 (d, *J* = 9.1 Hz, 1H), 6.69 – 6.65 (m, 2H), 3.36 (s, 3H) ppm.

**13C NMR** (126 MHz, CDCl3) δ 161.9, 154.3, 153.8, 150.1, 138.1, 133.9, 132.8, 132.1, 130.2, 129.7, 129.3, 128.6, 128.0, 127.4, 126.1, 124.6, 124.1, 121.0, 112.3, 111.9, 55.7 ppm.

**M.P.** 51 ℃ - 52 ℃

**HRMS** (ESI, m/z): calculated for C26H20O5SH+: 445.1110 (M+H)+, found: 445.1110.

**[α]21D** = -19.4 (c = 2.0 in CHCl3).

**HPLC analysis**: 86:14 *e.r.* (CHIRALPAK AD-H column, *i*PrOH/Hexane = 20:80, 0.5 mL/min, λ = 220 nm, tmajor = 19.1 min, tminor= 20.8 min).

Light yellow oil, 91% yield, *E*/*Z* >20:1.

**1H NMR** (400 MHz, CDCl3) δ 7.82 (d, *J* = 9.1 Hz, 1H), 7.77 (s, 1H), 7.72 (dd, *J* = 7.9, 1.2 Hz, 1H), 7.67 – 7.63 (m, 1H), 7.63 – 7.58 (m, 2H), 7.58 – 7.53 (m, 1H), 7.42 – 7.28 (m, 4H), 7.06 – 6.96 (m, 4H), 6.67 – 6.60 (m, 1H), 3.35 (s, 3H), 1.74 (s, 3H) ppm.

**13C NMR** (101 MHz, CDCl3) δ 162.0, 154.3, 153.4, 148.7, 138.0, 133.9, 132.9, 132.2, 131.1, 130.1, 129.9, 129.7, 128.6, 128.6, 128.0, 127.4, 126.8, 126.3, 124.7, 124.1, 121.4, 112.3, 111.75, 55.6, 15.8 ppm.

**HRMS** (ESI, m/z): calculated for C27H22O5SH+: 459.1266 (M+H)+, found: 459.1267.

**[α]21D** = -15.5 (c = 2.1 in CHCl3).

**HPLC analysis**: 83:17 *e.r.* (CHIRALPAK AD-H column, *i*PrOH/Hexane = 20:80, 0.5 mL/min, λ = 220 nm, tmajor = 18.2 min, tminor= 22.5 min).

Light yellow oil, 65% yield, *E*/*Z* >20:1.

**1H NMR** (400 MHz, CDCl3) δ 7.81 (d, *J* = 9.1 Hz, 1H), 7.78 (s, 1H), 7.73 – 7.65 (m, 2H), 7.64 – 7.58 (m, 2H), 7.58 – 7.53 (m, 1H), 7.42 – 7.34 (m, 3H), 7.30 (ddd, *J* = 8.1, 6.9, 1.2 Hz, 1H), 6.97 (d, *J* = 9.0 Hz, 1H), 6.93 – 6.82 (m, 3H), 3.34 (s, 3H), 1.74 (s, 6H) ppm.

**13C NMR** (101 MHz, CDCl3) δ 161.6, 154.2, 153.2, 147.6, 138.0, 133.9, 133.0, 132.2, 130.1, 129.9, 129.8, 128.6, 128.6, 128.5, 127.9, 127.4, 126.1, 124.8, 124.1, 112.3, 111.6, 55.4, 16.0 ppm.

**HRMS** (ESI, m/z): calculated for C28H24O5SH+: 473.1423 (M+H)+, found: 473.1423.

**[α]21D** = -1.8 (c = 4.3 in CHCl3).

**HPLC** **analysis**: 84:16 *e.r.* (CHIRALCEL AD-H column, *i*PrOH/Hexane = 20:80, 0.5 mL/min, λ = 220 nm, tmajor = 15.8 min, tminor= 18.5 min).

Light yellow solid, 97% yield, *E*/*Z* 15:1.

**1H NMR** (500 MHz, CDCl3) δ 7.84 (d, *J* = 9.0 Hz, 1H), 7.75 – 7.72 (m, 1H), 7.71 (s, 1H), 7.63 – 7.59 (m, 3H), 7.57 – 7.53 (m, 1H), 7.41 – 7.35 (m, 3H), 7.32 (ddd, *J* = 8.0, 6.8, 1.2 Hz, 1H), 7.01 (d, *J* = 9.1 Hz, 1H), 6.70 – 6.66 (m, 2H), 6.60 – 6.55 (m, 2H), 3.68 (s, 3H), 3.36 (s, 3H) ppm.

**13C NMR** (126 MHz, CDCl3) δ 162.3, 157.4, 154.4, 153.5, 143.6, 138.1, 133.9, 132.8, 132.1, 130.3, 129.7, 128.6, 128.0, 127.4, 124.6, 124.1, 121.8, 114.3, 112.4, 111.9, 55.7, 55.6 ppm.

**M.P.** 49 ℃ - 50 ℃.

**HRMS** (ESI, m/z): calculated for C27H22O6SH+: 475.1215 (M+H)+, found: 475.1215.

**[α]21D** = -19.3 (c = 2.3 in CHCl3).

**HPLC analysis**: >99:1 *e.r.* (CHIRALPAK AD-H column, *i*PrOH/Hexane = 24:76, 0.5 mL/min, λ = 220 nm, tmajor = 24.6 min, tminor= 25.8 min).

Light yellow oil, 94% yield, *E*/*Z* >20:1.

**1H NMR** (500 MHz, CDCl3) δ 7.82 (d, *J* = 9.1 Hz, 1H), 7.77 (s, 1H), 7.72 (d, *J* = 8.2 Hz, 1H), 7.64 (d, *J* = 8.5 Hz, 1H), 7.60 (dd, *J* = 7.7, 1.2 Hz, 2H), 7.57 – 7.52 (m, 1H), 7.41 – 7.34 (m, 3H), 7.33 – 7.28 (m, 1H), 7.08 – 7.03 (m, 1H), 7.00 (d, *J* = 9.0 Hz, 1H), 6.76 (ddd, *J* = 15.2, 7.9, 1.4 Hz, 2H), 6.64 (dd, *J* = 8.0, 1.6 Hz, 1H), 3.50 (s, 3H), 3.37 (s, 3H) ppm.

**13C NMR** (126 MHz, CDCl3) δ 161.4, 154.5, 153.5, 150.9, 139.1, 138.1, 133.8, 132.9, 132.1, 130.0, 129.7, 128.6, 128.6, 127.9, 127.2, 127.1, 124.7, 123.9, 122.3, 120.6, 112.5, 112.3, 111.9, 55.7, 55.7 ppm.

**HRMS** (ESI, m/z): calculated for C27H22O6SH+: 475.1215 (M+H)+, found: 475.1215.

**[α]21D** = -13.4 (c = 4.9 in CHCl3).

**HPLC** **analysis**: >99:1 *e.r.* (CHIRALPAK AD-H column, *i*PrOH/Hexane = 24:76, flow rate = 0.5 mL/min, λ = 254 nm, tmajor = 18.0 min, tminor= 23.0 min).

Light yellow solid, 87% yield, *E*/*Z* >20:1

**1H NMR** (500 MHz, CDCl3) δ 7.82 (d, *J* = 9.0 Hz, 1H), 7.74 (s, 1H), 7.72 (dd, *J* = 8.1, 1.3 Hz, 1H), 7.65 – 7.62 (m, 1H), 7.50 – 7.46 (m, 2H), 7.38 (ddd, *J* = 8.4, 6.8, 1.3 Hz, 1H), 7.30 (ddd, *J* = 8.0, 6.8, 1.1 Hz, 1H), 7.16 (d, *J* = 8.1 Hz, 2H), 7.08 – 7.00 (m, 2H), 6.79 – 6.73 (m, 2H), 6.64 (dd, *J* = 7.9, 1.7 Hz, 1H), 3.50 (s, 3H), 3.40 (s, 3H), 2.38 (s, 3H) ppm.

**13C NMR** (126 MHz, CDCl3) δ 161.4, 154.5, 153.7, 150.9, 144.9, 139.2, 135.0, 132.9, 131.9, 129.8, 129.5, 129.2, 128.6, 127.9, 127.1, 124.8, 123.9, 122.3, 120.9, 112.5, 112.0, 55.7, 55.6, 21.7 ppm.

**M.P.** 58 ℃ - 59 ℃.

**HRMS** (ESI, m/z): calculated for C28H24O6SH+: 489.1372 (M+H)+, found: 489.1372.

**[α]21D** = -8.5 (c = 3.7 in CHCl3).

**HPLC analysis**: >99:1 *e.r.* (CHIRALPAK AD-H column, *i*PrOH/Hexane = 24:76, flow rate = 0.5 mL/min, λ = 254 nm, tmajor = 22.5 min, tminor= 30.3 min).

Light yellow oil, 46% yield, *E*/*Z* >20:1.

**1H NMR** (400 MHz, CDCl3) δ 7.82 – 7.74 (m, 3H), 7.71 (d, *J* = 8.2 Hz, 1H), 7.52 (d, *J* = 7.9 Hz, 1H), 7.48 – 7.38 (m, 2H), 7.36 – 7.28 (m, 1H), 7.29 – 7.23 (m, 2H), 7.13 – 7.01 (m, 2H), 6.93 (d, *J* = 9.1 Hz, 1H), 6.81 – 6.72 (m, 2H), 6.67 (dd, *J* = 7.9, 1.7 Hz, 1H), 3.50 (s, 3H), 3.30 (s, 3H), 2.56 (s, 3H) ppm.

**13C NMR** (101 MHz, CDCl3) δ 161.4, 154.5, 152.8, 150.9, 140.6, 139.2, 135.9, 133.9, 133.2, 132.2, 132.0, 131.9, 130.3, 128.7, 127.8, 127.2, 127.1, 125.9, 125.1, 124.0, 122.4, 120.6, 112.5, 112.1, 111.7, 55.7, 55.5, 20.7 ppm.

**HRMS** (ESI, m/z): calculated for C28H24O6SNa+: 511.1191 (M+Na)+, found: 511.1195.

**[α]21D** = +15.5 (c = 1.0 in CHCl3).

**HPLC** **analysis**: 82.5:17.5 *e.r.* (CHIRALCEL AD-H column, *i*PrOH/Hexane = 24:76, flow rate = 0.5 mL/min, λ = 254 nm, tmajor = 19.9 min, tminor= 24.8 min).

Side product, light yellow oil, 29% yield.

**1H NMR** (400 MHz, CDCl3) δ 8.14 (d, *J* = 8.3 Hz, 1H), 7.95 (d, *J* = 9.1 Hz, 1H), 7.80 (d, *J* = 8.7 Hz, 1H), 7.60 – 7.53 (m, 1H), 7.44 – 7.38 (m, 1H), 7.30 – 7.23 (m, 2H), 7.21 (dd, *J* = 7.9, 1.6 Hz, 1H), 7.05 – 6.98 (m, 2H), 4.05 (s, 3H), 3.88 (s, 3H) ppm.

**13C NMR** (101 MHz, CDCl3) δ 162.3, 152.5, 151.5, 139.6, 135.2, 133.7, 128.5, 128.4, 128.3, 127.5, 125.0, 124.8, 123.0, 121.0, 112.8, 112.4, 102.3, 89.5, 84.8, 56.7, 56.1 ppm.

**HRMS** (ESI, m/z): calculated for C21H16O4H+: 333.1127 (M+H)+, found: 333.1128.

Light yellow oil, 69% yield, *E*/*Z* >20:1.

**1H NMR** (400 MHz, CDCl3) δ 7.82 (d, *J* = 9.0 Hz, 1H), 7.74 – 7.69 (m, 2H), 7.61 (d, *J* = 8.5 Hz, 1H), 7.50 (d, *J* = 8.8 Hz, 2H), 7.37 (ddd, *J* = 8.4, 6.8, 1.3 Hz, 1H), 7.29 (ddd, *J* = 8.0, 6.9, 1.2 Hz, 1H), 7.05 (t, *J* = 8.8 Hz, 2H), 6.83 – 6.72 (m, 4H), 6.65 (d, *J* = 7.8 Hz, 1H), 3.82 (s, 3H), 3.50 (s, 3H), 3.46 (s, 3H) ppm.

**13C NMR** (101 MHz, CDCl3) δ 164.1, 161.5, 154.6, 153.9, 150.9, 139.2, 132.9, 132.0, 131.9, 129.4, 129.1, 128.6, 127.9, 127.1, 124.8, 123.9, 122.4, 120.6, 113.9, 112.7, 112.5, 112.1, 55.9, 55.8, 55.7 ppm.

**HRMS** (ESI, m/z): calculated for C28H24O7SNa+: 527.1140 (M+Na)+, found: 527.1136.

**[α]21D** = -7.2 (c = 1.0 in CHCl3).

**HPLC** **analysis**: 95:5 *e.r.* (CHIRALPAK AD-H column, *i*PrOH/Hexane = 30:70, flow rate = 0.5 mL/min), λ = 220 nm, tmajor = 28.3 min, tminor= 36.1 min).

Light yellow oil, 75% yield, *E*/*Z* >20:1.

**1H NMR** (400 MHz, CDCl3) δ 7.84 (d, *J* = 9.1 Hz, 1H), 7.77 (s, 1H), 7.73 (d, *J* = 8.1 Hz, 1H), 7.66 – 7.55 (m, 3H), 7.41 (ddd, *J* = 8.4, 6.7, 1.4 Hz, 1H), 7.32 (ddd, *J* = 8.1, 6.8, 1.2 Hz, 1H), 7.04 (ddt, *J* = 12.2, 8.5, 4.7 Hz, 4H), 6.80 – 6.72 (m, 2H), 6.65 (dd, *J* = 7.9, 1.7 Hz, 1H), 3.50 (s, 3H), 3.46 (s, 3H) ppm.

**13C NMR** (101 MHz, CDCl3) δ 166.1 (d, *J* = 256.6 Hz), 161.3, 154.5, 153.2, 150.9, 139.1, 134.0 (d, *J* = 2.9 Hz), 132.8, 132.7, 132.6, 132.2, 130.0, 128.6, 128.0, 127.2 (d, *J* = 11.5 Hz), 124.7, 124.1, 122.3, 120.6, 115.8 (d, J = 22.6 Hz), 112.5, 112.2, 111.9, 55.8, 55.7 ppm.

**HRMS** (ESI, m/z): calculated for C27H21FO6SH+: 493.1121 (M+H)+, found: 493.1121.

**[α]21D** = -18.7 (c = 3.4 in CHCl3).

**HPLC** **analysis**: 98:2 *e.r.* (CHIRALPAK AD-H column, *i*PrOH/Hexane = 24:76, flow rate = 0.5 mL/min), λ = 254 nm, tmajor = 18.7 min, tminor= 22.8 min).

Light yellow oil, 77% yield, *E*/*Z* >20:1.

**1H NMR** (500 MHz, CDCl3) δ 7.84 (d, *J* = 9.1 Hz, 1H), 7.77 (s, 1H), 7.73 (dd, *J* = 8.2, 1.2 Hz, 1H), 7.65 (dd, *J* = 8.4, 1.1 Hz, 1H), 7.55 – 7.49 (m, 2H), 7.42 (ddd, *J* = 8.3, 6.8, 1.3 Hz, 1H), 7.36 – 7.30 (m, 3H), 7.06 (ddd, *J* = 8.3, 7.5, 1.7 Hz, 1H), 7.02 (d, *J* = 9.1 Hz, 1H), 6.80 – 6.73 (m, 2H), 6.65 (dd, *J* = 7.9, 1.7 Hz, 1H), 3.50 (s, 3H), 3.43 (s, 3H) ppm.

**13C NMR** (126 MHz, CDCl3) δ 161.2, 154.4, 153.0, 150.8, 140.7, 139.1, 136.5, 132.8, 132.2, 131.2, 130.2, 128.8, 128.6, 128.0, 127.3, 127.2, 124.7, 124.1, 122.3, 120.6, 112.5, 112.0, 111.9, 55.7, 55.6 ppm.

**HRMS** (ESI, m/z): calculated for C27H21ClO6SH+: 509.0826 (M+H)+, found: 509.0826.

**[α]21D** = +1.2 (c = 3.9 in CHCl3).

**HPLC** **analysis**: >99:1 *e.r.* (CHIRALPAK AD-H column, *i*PrOH/Hexane = 24:76, flow rate = 0.5 mL/min, λ = 254 nm, tmajor = 22.0 min, tminor= 28.3 min).

Light yellow solid, 85% yield, *E*/*Z* >20:1.

**1H NMR** (400 MHz, CDCl3) δ 7.84 (d, *J* = 9.0 Hz, 1H), 7.77 (s, 1H), 7.75 – 7.71 (m, 1H), 7.68 – 7.63 (m, 1H), 7.54 – 7.48 (m, 2H), 7.47 – 7.39 (m, 3H), 7.33 (ddd, *J* = 8.0, 6.9, 1.2 Hz, 1H), 7.09 – 6.99 (m, 2H), 6.81 – 6.73 (m, 2H), 6.65 (dd, *J* = 7.9, 1.7 Hz, 1H), 3.50 (s, 3H), 3.42 (s, 3H) ppm.

**13C NMR** (101 MHz, CDCl3) δ 161.2, 154.4, 152.9, 150.8, 139.1, 137.0, 132.8, 132.2, 131.8, 131.2, 130.3, 129.3, 128.6, 128.0, 127.3, 127.2, 124.7, 124.1, 122.3, 120.6, 112.5, 112.0, 111.8, 55.7, 55.6 ppm.

**M.P.** 166 ℃ - 167 ℃

**HRMS** (ESI, m/z): calculated for C27H21BrO6SH+: 553.0320 (M+H)+, found: 553.0318.

**[α]21D** = +9.6 (c = 4.2 in CHCl3).

**HPLC analysis**: >99:1 *e.r.* (CHIRALPAK AD-H column, *i*PrOH/Hexane = 20:80, flow rate = 0.5 mL/min), λ = 254 nm, tmajor = 27.8 min, tminor= 39.1 min).

Light yellow oil, 98% yield, *E*/*Z* >20:1.

**1H NMR** (400 MHz, CDCl3) δ 7.85 (d, *J* = 9.1 Hz, 1H), 7.82 (s, 1H), 7.78 – 7.70 (m, 3H), 7.68 – 7.59 (m, 3H), 7.41 (ddd, *J* = 8.4, 6.8, 1.4 Hz, 1H), 7.33 (ddd, *J* = 8.1, 6.8, 1.2 Hz, 1H), 7.06 (td, *J* = 7.9, 1.7 Hz, 1H), 7.00 (d, *J* = 9.1 Hz, 1H), 6.82 – 6.72 (m, 2H), 6.65 (dd, *J* = 7.9, 1.7 Hz, 1H), 3.50 (s, 3H), 3.36 (s, 3H) ppm.

**13C NMR** (126 MHz, CDCl3) δ 161.1, 154.4, 152.5, 150.8, 141.6, 139.0, 135.4 (q, *J* = 33.1 Hz), 132.8, 132.4, 131.0, 130.3, 128.6, 128.0, 127.4, 127.2, 125.5 (q, *J* = 3.7 Hz), 124.5, 124.1, 122.2, 120.6, 112.5, 111.8, 111.7, 55.6, 55.5 ppm.

**HRMS** (ESI, m/z): calculated for C28H21F3O6SH+: 543.1089 (M+H)+, found: 543.1089.

**[α]21D** = -15.2 (c = 3.5 in CHCl3).

**HPLC** **analysis**: 87.5:12.5 *e.r.* (CHIRALPAK AD-H column, *i*PrOH/Hexane = 20:80, flow rate = 0.5 mL/min, λ = 254 nm, tmajor = 21.8 min, tminor= 29.4 min).

Light yellow oil, 96% yield, *E*/*Z* >20:1.

**1H NMR** (400 MHz, CDCl3) δ 7.85 (d, *J* = 9.1 Hz, 1H), 7.81 (s, 1H), 7.74 (d, *J* = 8.1 Hz, 1H), 7.72 – 7.67 (m, 2H), 7.62 (dd, *J* = 8.5, 1.7 Hz, 3H), 7.42 (ddd, *J* = 8.4, 6.9, 1.4 Hz, 1H), 7.34 (ddd, *J* = 8.1, 6.8, 1.2 Hz, 1H), 7.10 – 7.03 (m, 1H), 7.01 (d, *J* = 9.1 Hz, 1H), 6.81 – 6.73 (m, 2H), 6.64 (dd, *J* = 7.9, 1.7 Hz, 1H), 3.49 (s, 3H), 3.41 (s, 3H) ppm.

**13C NMR** (101 MHz, CDCl3) δ 160.9, 154.4, 152.1, 150.7, 142.3, 138.9, 132.7, 132.6, 132.1, 131.3, 130.3, 128.6, 128.1, 127.4, 127.2, 124.4, 124.2, 122.2, 120.6, 117.3, 117.3, 112.5, 111.9, 111.6, 55.7, 55.6 ppm.

**HRMS** (ESI, m/z): calculated for C28H21NO6SH+: 500.1168 (M+H)+, found: 500.1169.

**[α]21D** = +6.6 (c = 4.3 in CHCl3).

**HPLC** **analysis**: 93:7 *e.r.* (CHIRALPAK AD-H column, *i*PrOH/Hexane = 30:70, flow rate = 0.5 mL/min, λ = 254 nm, tmajor = 35.8 min, tminor= 39.8 min).

Light yellow oil, 99% yield, *E*/*Z* >20:1.

**1H NMR** (400 MHz, CDCl3) δ 7.86 (d, *J* = 9.0 Hz, 1H), 7.78 (s, 1H), 7.75 – 7.71 (m, 1H), 7.63 (dd, *J* = 5.0, 1.4 Hz, 1H), 7.60 – 7.56 (m, 1H), 7.37 (ddd, *J* = 8.4, 6.8, 1.4 Hz, 1H), 7.33 – 7.27 (m, 2H), 7.12 (d, *J* = 9.0 Hz, 1H), 7.06 (ddd, *J* = 8.3, 7.5, 1.7 Hz, 1H), 6.97 (dd, *J* = 5.0, 3.8 Hz, 1H), 6.80 – 6.73 (m, 2H), 6.65 (dd, *J* = 7.8, 1.7 Hz, 1H), 3.58 (s, 3H), 3.50 (s, 3H) ppm.

**13C NMR** (101 MHz, CDCl3) δ 161.3, 155.2, 153.5, 150.8, 139.1, 138.7, 136.1, 135.4, 133.1, 132.1, 129.6, 128.6, 128.0, 127.7, 127.2, 127.1, 124.3, 123.9, 122.3, 120.6, 112.5, 112.2, 56.1, 55.6 ppm.

**HRMS** (ESI, m/z): calculated for C25H20O6S2H+: 481.0780 (M+H)+, found: 481.0779.

**[α]21D** = -34.1 (c = 4.9 in CHCl3).

**HPLC** **analysis**: 98.5:1.5 *e.r.* (CHIRALPAK AD-H column, *i*PrOH/Hexane = 24:76, flow rate = 0.5 mL/min, λ = 220 nm, tmajor = 24.8 min, tminor= 29.3 min).

Light yellow oil, 90% yield, *E*/*Z* 5:1.

**1H NMR** (500 MHz, CDCl3) δ 7.93 (d, *J* = 9.0 Hz, 1H), 7.83 – 7.80 (m, 1H), 7.80 – 7.76 (m, 1H), 7.67 (s, 1H), 7.52 (ddd, *J* = 8.4, 6.8, 1.3 Hz, 1H), 7.38 (ddd, *J* = 8.1, 6.8, 1.2 Hz, 1H), 7.30 (d, *J* = 9.1 Hz, 1H), 7.08 (ddd, *J* = 8.2, 7.5, 1.7 Hz, 1H), 6.83 – 6.74 (m, 2H), 6.65 (dd, *J* = 7.9, 1.6 Hz, 1H), 3.97 (s, 3H), 3.51 (s, 3H), 2.95 (s, 3H) ppm.

**13C NMR** (126 MHz, CDCl3) δ 161.2, 154.5, 152.2, 150.8, 139.0, 133.0, 132.4, 130.6, 129.1, 128.1, 127.6, 127.2, 124.8, 124.4, 122.3, 120.6, 113.0, 112.8, 112.5, 56.8, 55.6, 40.6 ppm.

**HRMS** (ESI, m/z): calculated for C22H20O6SH+: 413.1059 (M+H)+, found: 413.1058.

**[α]21D** = -54.3 (c = 3.7 in CHCl3).

**HPLC** **analysis** for the *E* isomer: 93:7 *e.r.* (CHIRALPAK AD-H column, *i*PrOH/Hexane = 25:75, flow rate = 0.5 mL/min, λ = 254 nm, tmajor = 25.8 min, tminor= 37.6 min).

Light yellow oil, 83% yield, *E*/*Z* 20:1.

**1H NMR** (500 MHz, CDCl3) δ 7.92 (d, *J* = 9.0 Hz, 1H), 7.83 (dd, *J* = 8.6, 1.0 Hz, 1H), 7.78 – 7.75 (m, 1H), 7.63 (s, 1H), 7.51 (ddd, *J* = 8.4, 6.8, 1.3 Hz, 1H), 7.37 (ddd, *J* = 8.1, 6.8, 1.1 Hz, 1H), 7.28 (d, *J* = 9.1 Hz, 1H), 7.07 (ddd, *J* = 8.3, 7.5, 1.7 Hz, 1H), 6.81 – 6.75 (m, 2H), 6.65 (dd, *J* = 7.9, 1.7 Hz, 1H), 3.96 (s, 3H), 3.50 (s, 3H), 3.18 – 3.09 (m, 1H), 3.07 – 2.98 (m, 1H), 1.40 (t, *J* = 7.4 Hz, 3H) ppm.

**13C NMR** (126 MHz, CDCl3) δ 161.2, 154.6, 151.1, 150.8, 139.1, 133.2, 132.3, 131.9, 129.2, 128.1, 127.5, 127.2, 125.0, 124.4, 122.3, 120.7, 113.1, 112.7, 112.5, 56.7, 55.6, 47.1, 6.4 ppm.

**HRMS** (ESI, m/z): calculated for C23H22O6SH+: 427.1215 (M+H)+, found: 427.1211.

**[α]21D** = -38.2 (c = 2.0 in CHCl3).

**HPLC** **analysis**: 93:7 *e.r.* (CHIRALPAK AD-H column, *i*PrOH/Hexane = 24:76, flow rate = 0.5 mL/min, λ = 220 nm, tmajor = 23.6 min, tminor= 29.2 min).

Light yellow oil, 78% yield, *E*/*Z* >20:1.

**1H NMR** (500 MHz, CDCl3) δ 7.80 (d, *J* = 9.1 Hz, 1H), 7.75 (s, 1H), 7.73 – 7.69 (m, 1H), 7.65 (dd, *J* = 8.5, 1.1 Hz, 1H), 7.62 – 7.58 (m, 2H), 7.56 – 7.51 (m, 1H), 7.40 – 7.32 (m, 3H), 7.30 (ddd, *J* = 8.1, 6.8, 1.2 Hz, 1H), 7.06 (ddd, *J* = 8.2, 7.5, 1.7 Hz, 1H), 6.99 (d, *J* = 9.0 Hz, 1H), 6.80 – 6.73 (m, 2H), 6.64 (dd, *J* = 7.9, 1.7 Hz, 1H), 3.90 – 3.83 (m, 1H), 3.57 – 3.49 (m, 1H), 3.52 (s, 3H), 1.12 (t, *J* = 7.0 Hz, 3H) ppm.

**13C NMR** (126 MHz, CDCl3) δ 161.4, 154.2, 153.7, 150.9, 139.1, 138.2, 133.79, 132.9, 131.9, 129.9, 129.7, 128.6, 128.5, 127.8, 127.1, 127.0, 124.9, 123.9, 122.3, 120.6, 112.9, 112.5, 112.4, 64.2, 55.6, 14.9 ppm.

**HRMS** (ESI, m/z): calculated for C28H24O6SH+: 489.1372 (M+H)+, found: 489.1373.

**[α]21D** = -24.1 (c = 2.8 in CHCl3).

**HPLC** **analysis**: 98.5:1.5 *e.r.* (CHIRALPAK AD-H column, *i*PrOH/Hexane = 24:76, flow rate = 0.5 mL/min, λ = 254 nm, tmajor = 19.5 min, tminor= 24.7 min).

Light yellow oil, 82% yield, *E*/*Z* >20:1.

**1H NMR** (500 MHz, CDCl3) δ 7.83 – 7.78 (m, 2H), 7.74 (ddd, *J* = 7.6, 3.9, 1.1 Hz, 2H), 7.55 – 7.51 (m, 2H), 7.48 – 7.41 (m, 2H), 7.36 – 7.30 (m, 4H), 7.25 – 7.21 (m, 2H), 7.21 – 7.15 (m, 2H), 7.07 (ddd, *J* = 8.4, 7.5, 1.7 Hz, 1H), 7.02 (d, *J* = 9.1 Hz, 1H), 6.81 – 6.73 (m, 2H), 6.61 (dd, *J* = 8.0, 1.6 Hz, 1H), 4.85 (d, *J* = 12.2 Hz, 1H), 4.58 (d, *J* = 12.1 Hz, 1H), 3.46 (s, 3H) ppm.

**13C NMR** (126 MHz, CDCl3) δ 161.4, 153.9, 153.6, 150.9, 139.0, 137.8, 136.9, 133.7, 133.0, 132.0, 129.9, 129.6, 128.7, 128.5, 128.5, 127.9, 127.8, 127.2, 127.1, 126.7, 125.0, 124.1, 122.3, 120.6, 113.2, 112.9, 112.4, 70.4, 55.6 ppm.

**HRMS** (ESI, m/z): calculated for C33H26O6SH+: 551.1528 (M+H)+, found: 551.1528.

**[α]21D** = -13.4 (c = 4.5 in CHCl3).

**HPLC analysis**: 93:7 *e.r.* (CHIRALPAK AD-H column, *i*PrOH/Hexane = 24:76, flow rate = 0.5 mL/min, λ = 220 nm, tmajor = 22.5 min, tminor= 26.8 min).

Light yellow oil, 91% yield, *E*/*Z* >20:1.

**1H NMR** (500 MHz, CDCl3) δ 7.81 (d, *J* = 9.1 Hz, 1H), 7.78 (s, 1H), 7.72 (dd, *J* = 8.1, 1.4 Hz, 1H), 7.63 – 7.57 (m, 2H), 7.59 – 7.51 (m, 2H), 7.39 – 7.27 (m, 5H), 7.05 (dd, *J* = 1.6, 0.7 Hz, 1H), 6.76 (ddd, *J* = 9.1, 8.0, 1.4 Hz, 2H), 6.58 (dd, *J* = 8.0, 1.6 Hz, 1H), 4.78 (d, *J* = 7.0 Hz, 1H), 4.66 (d, *J* = 7.1 Hz, 1H), 3.47 (s, 3H), 3.31 (s, 3H) ppm.

**13C NMR** (126 MHz, CDCl3) δ 161.4, 153.2, 153.0, 150.8, 139.0, 138.0, 133.9, 132.7, 132.0, 130.1, 129.7, 129.1, 128.7, 127.9, 127.2, 127.0, 124.9, 124.3, 122.2, 120.6, 115.2, 113.3, 112.5, 94.9, 56.0, 55.5 ppm.

**HRMS** (ESI, m/z): calculated for C28H24O7SH+: 505.1321 (M+H)+, found: 505.1320.

**[α]21D** = -7.3 (c = 4.6 in CHCl3).

**HPLC** **analysis**: 93:7 *e.r.* (CHIRALPAK AD-H column, *i*PrOH/Hexane = 24:76, flow rate = 0.5 mL/min, λ = 254 nm, tmajor = 17.8 min, tminor= 20.2 min).

Light yellow oil, 84% yield, *E*/*Z* >20:1.

**1H NMR** (400 MHz, CDCl3) δ 8.00 (dd, *J* = 8.7, 1.3 Hz, 1H), 7.88 (d, *J* = 8.7 Hz, 1H), 7.78 (d, *J* = 8.2 Hz, 1H), 7.71 (s, 1H), 7.55 – 7.41 (m, 5H), 7.31 – 7.24 (m, 3H), 7.07 – 6.99 (m, 1H), 6.78 – 6.71 (m, 2H), 6.69 – 6.63 (m, 1H), 3.78 (s, 3H), 3.50 (s, 3H) ppm.

**13C NMR** (101 MHz, CDCl3) δ 166.4, 161.3, 155.6, 150.7, 139.0, 136.9, 134.7, 134.0, 131.2, 129.9, 129.7, 129.6, 128.9, 128.2, 127.9, 127.8, 127.0, 126.9, 126.2, 125.7, 122.2, 120.5, 112.4, 55.5, 52.3 ppm.

**HRMS** (ESI, m/z): calculated for C28H22O7SH+: 503.1164 (M+H)+, found: 503.1166.

**[α]21D** = -52.1 (c = 2.0 in CHCl3).

**HPLC** **analysis**: 78.5:21.5 *e.r.* (CHIRALPAK AD-H column, *i*PrOH/Hexane = 24:76, flow rate = 0.5 mL/min, λ = 220 nm, tmajor = 30.4 min, tminor= 37.1 min).

Light yellow oil, 75% yield, *E*/*Z* >20:1.

**1H NMR** (400 MHz, CDCl3) δ 7.86 (d, *J* = 8.6 Hz, 1H), 7.81 (s, 1H), 7.73 – 7.70 (m, 1H), 7.68 (d, *J* = 8.6 Hz, 1H), 7.56 – 7.50 (m, 2H), 7.50 – 7.44 (m, 1H), 7.35 – 7.23 (m, 4H), 7.13 (ddd, *J* = 8.4, 6.8, 1.3 Hz, 1H), 7.03 (ddd, *J* = 8.3, 7.4, 1.7 Hz, 1H), 6.74 (ddd, *J* = 14.6, 7.9, 1.4 Hz, 2H), 6.65 (dd, *J* = 7.9, 1.7 Hz, 1H), 5.84 (s, 1H), 4.19 – 4.11 (m, 1H), 4.10 – 4.01 (m, 1H), 3.99 – 3.91 (m, 2H), 3.51 (s, 3H) ppm.

**13C NMR** (101 MHz, CDCl3) δ 161.0, 154.0, 150.8, 139.1, 136.7, 135.6, 134.3, 133.3, 131.2, 130.6, 130.4, 129.8, 129.1, 127.9, 127.1, 126.3, 126.3, 125.5, 123.6, 122.4, 120.6, 112.5, 102.0, 65.8, 65.4, 55.7 ppm.

**HRMS** (ESI, m/z): calculated for C29H24O7SH+: 517.1321 (M+H)+, found: 517.1318.

**[α]21D** = -18.0 (c = 3.9 in CHCl3).

**HPLC** **analysis**: 78:22 *e.r.* (CHIRALPAK AD-H column, *i*PrOH/Hexane = 28:72, flow rate = 0.5 mL/min, λ = 220 nm, tminor= 27.9 min, tmajor = 34.2 min).

Light yellow oil, 88% yield, *E*/*Z* >20:1.

**1H NMR** (500 MHz, CDCl3) δ 7.72 (s, 1H), 7.69 – 7.64 (m, 2H), 7.61 (dd, *J* = 8.5, 1.2 Hz, 1H), 7.57 – 7.52 (m, 1H), 7.38 – 7.32 (m, 2H), 7.30 – 7.26 (m, 2H), 7.17 (s, 1H), 7.12 (ddd, *J* = 8.1, 6.9, 1.3 Hz, 1H), 7.06 (ddd, *J* = 8.3, 7.5, 1.7 Hz, 1H), 6.80 – 6.73 (m, 2H), 6.64 (dd, *J* = 7.9, 1.6 Hz, 1H), 3.90 (s, 3H), 3.76 (s, 3H), 3.50 (s, 3H) ppm.

**13C NMR** (126 MHz, CDCl3) δ 161.3, 154.4, 151.6, 150.8, 147.6, 139.0, 137.8, 134.1, 130.7, 129.6, 129.4, 128.9, 127.4, 127.2, 126.6, 125.2, 124.4, 122.3, 120.6, 119.2, 112.4, 109.7, 60.8, 55.7, 55.5 ppm.

**HRMS** (ESI, m/z): calculated for C28H24O7SH+: 505.1321 (M+H)+, found: 505.1315.

**[α]21D** = -41.0 (c = 1.3 in CHCl3).

**HPLC** **analysis**: 97:3 *e.r.* (CHIRALPAK AD-H column, *i*PrOH/Hexane = 24:76, flow rate = 0.5 mL/min, λ = 254 nm, tmajor= 21.0 min, tminor = 23.5 min).

Light yellow oil, 87% yield, *E*/*Z* >20:1.

**1H NMR** (400 MHz, CDCl3) δ 8.07 (s, 1H), 7.76 (s, 1H), 7.66 – 7.56 (m, 4H), 7.47 – 7.42 (m, 1H), 7.39 – 7.30 (m, 4H), 7.09 (ddd, *J* = 8.7, 7.5, 1.7 Hz, 1H), 6.82 – 6.75 (m, 2H), 6.68 (dd, *J* = 7.8, 1.7 Hz, 1H), 3.72 (s, 3H), 3.52 (s, 3H) ppm.

**13C NMR** (101 MHz, CDCl3) δ 161.3, 154.6, 152.4, 150.7, 138.8, 137.2, 134.8, 134.4, 131.7, 131.2, 129.7, 129.2, 129.0, 127.4, 127.2, 127.1, 126.0, 124.9, 122.2, 121.2, 120.7, 116.1, 112.4, 61.4, 55.6 ppm.

**HRMS** (ESI, m/z): calculated for C27H21BrO6SH+: 553.0320 (M+H)+, found: 553.0324.

**[α]21D** = -23.1 (c = 1.0 in CHCl3).

**HPLC** **analysis**: 92:8 *e.r.* (CHIRALPAK AD-H column, *i*PrOH/Hexane = 24:76, flow rate = 0.5 mL/min, λ = 254 nm, tmajor = 21.4 min, tminor = 24.6 min).

Light yellow oil, 94% yield, *E*/*Z* >20:1.

**1H NMR** (400 MHz, CDCl3) δ 7.76 (s, 1H), 7.71 (d, *J* = 9.0 Hz, 1H), 7.63 – 7.52 (m, 4H), 7.39 – 7.34 (m, 2H), 7.11 – 7.02 (m, 3H), 6.97 (d, *J* = 9.1 Hz, 1H), 6.81 – 6.73 (m, 2H), 6.66 (dd, *J* = 7.8, 1.7 Hz, 1H), 3.87 (s, 3H), 3.54 (s, 3H), 3.33 (s, 3H) ppm.

**13C NMR** (101 MHz, CDCl3) δ 161.3, 156.2, 153.5, 153.0, 150.9, 139.1, 138.0, 133.8, 130.5, 129.8, 129.7, 129.6, 128.5, 128.2, 127.1, 126.3, 122.3, 120.6, 120.0, 112.6, 112.5, 112.5, 106.0, 55.7, 55.7, 55.4 ppm.

**HRMS** (ESI, m/z): calculated for C28H24O7SH+: 505.1321 (M+H)+, found: 505.1321.

**[α]21D** = -22.5 (c = 4.7 in CHCl3).

**HPLC** **analysis**: >99:1 *e.r.* (CHIRALPAK AD-H column, *i*PrOH/Hexane = 20:80, flow rate = 0.5 mL/min, λ = 220 nm, tmajor = 36.5 min, tminor= 38.6 min).

Light yellow oil, 95% yield, *E*/*Z* >20:1.

**1H NMR** (400 MHz, CDCl3) δ 7.93 (d, *J* = 1.8 Hz, 1H), 7.89 (d, *J* = 9.1 Hz, 1H), 7.82 (s, 1H), 7.76 (d, *J* = 8.8 Hz, 1H), 7.72 – 7.62 (m, 5H), 7.59 – 7.53 (m, 1H), 7.48 (dd, *J* = 8.5, 6.9 Hz, 2H), 7.43 – 7.34 (m, 3H), 7.09 – 7.01 (m, 2H), 6.77 (dd, *J* = 8.5, 7.0 Hz, 2H), 6.70 (dd, *J* = 7.8, 1.7 Hz, 1H), 3.52 (s, 3H), 3.37 (s, 3H) ppm.

**13C NMR** (101 MHz, CDCl3) δ 161.4, 154.5, 153.4, 150.8, 141.0, 139.1, 138.0, 136.6, 133.8, 132.3, 132.1, 130.0, 129.7, 128.9, 128.9, 128.6, 127.3, 127.1, 126.9, 125.7, 125.6, 122.3, 120.6, 112.5, 112.3, 112.3, 55.7, 55.7 ppm.

**HRMS** (ESI, m/z): calculated for C33H26O6SNa+: 573.1348 (M+Na)+, found: 573.1351.

**[α]21D** = -33.2 (c = 2.0 in CHCl3).

**HPLC** **analysis**: 88:12 *e.r.* (CHIRALPAK AD-H column, *i*PrOH/Hexane = 24:76, flow rate = 0.5 mL/min, λ = 220 nm, tmajor = 39.0 min, tminor= 47.4 min).

Light yellow solid, 74% yield, *E*/*Z* >20:1.

**1H NMR** (400 MHz, CDCl3) δ 7.77 (s, 1H), 7.73 (d, *J* = 9.1 Hz, 1H), 7.71 (d, *J* = 2.2 Hz, 1H), 7.63 – 7.55 (m, 4H), 7.41 – 7.36 (m, 2H), 7.34 (dd, *J* = 9.1, 2.2 Hz, 1H), 7.07 (ddd, *J* = 8.3, 7.5, 1.7 Hz, 1H), 7.02 (d, *J* = 9.1 Hz, 1H), 6.82 – 6.75 (m, 2H), 6.69 (dd, *J* = 7.8, 1.7 Hz, 1H), 3.54 (s, 3H), 3.35 (s, 3H) ppm.

**13C NMR** (101 MHz, CDCl3) δ 161.3, 154.6, 153.0, 150.8, 139.0, 137.9, 134.0, 131.2, 131.1, 130.2, 129.7, 129.1, 128.7, 128.0, 127.2, 126.6, 126.5, 122.3, 120.7, 113.0, 112.7, 112.5, 55.8, 55.7 ppm.

**M.P.** 165 ℃ - 166 ℃

**HRMS** (ESI, m/z): calculated for C27H21ClO6SH+: 509.0826 (M+H)+, found: 509.0827.

**[α]21D** = -5.2 (c = 0.1 in CHCl3).

**HPLC** **analysis**: >99:1 *e.r.* (CHIRALPAK AD-H column, *i*PrOH/Hexane = 24:76, flow rate = 0.5 mL/min, λ = 254 nm, tmajor = 21.5 min, tminor= 25.2 min).

Light yellow solid, 78% yield, *E*/*Z* >20:1.

**1H NMR** (400 MHz, CDCl3) δ 7.88 (d, *J* = 2.0 Hz, 1H), 7.77 (s, 1H), 7.74 – 7.71 (m, 1H), 7.61 – 7.54 (m, 4H), 7.46 (dd, *J* = 9.1, 2.1 Hz, 1H), 7.41 – 7.36 (m, 2H), 7.07 (ddd, *J* = 8.3, 7.4, 1.7 Hz, 1H), 7.01 (d, *J* = 9.1 Hz, 1H), 6.81 – 6.75 (m, 2H), 6.69 (dd, *J* = 7.8, 1.7 Hz, 1H), 3.54 (s, 3H), 3.34 (s, 3H) ppm.

**13C NMR** (101 MHz, CDCl3) δ 161.2, 154.6, 152.9, 150.8, 139.0, 137.8, 134.0, 131.4, 131.1, 130.4, 130.2, 129.8, 129.7, 129.6, 128.6, 127.2, 126.7, 122.3, 120.6, 117.7, 112.9, 112.7, 112.5, 55.7, 55.7 ppm.

**M.P.** 170 ℃ - 171 ℃

**HRMS** (ESI, m/z): calculated for C27H21BrO6SH+: 553.0320 (M+H)+, found: 553.0314.

**[α]21D** = -15.2 (c = 0.7 in CHCl3).

**HPLC** **analysis**: >99:1 *e.r.* (CHIRALPAK AD-H column, *i*PrOH/Hexane = 24:76, flow rate = 0.5 mL/min, λ = 254 nm, tmajor = 28.2 min, tminor= 33.1 min).

Light yellow solid, 58% yield, *E*/*Z* >20:1

**1H NMR** (400 MHz, CDCl3) δ 8.12 (d, *J* = 1.8 Hz, 1H), 7.89 (d, *J* = 9.1 Hz, 1H), 7.78 (s, 1H), 7.71 (d, *J* = 8.8 Hz, 1H), 7.63 – 7.57 (m, 3H), 7.50 (dd, *J* = 8.8, 1.8 Hz, 1H), 7.40 (dd, *J* = 8.8, 6.9 Hz, 2H), 7.16 – 7.05 (m, 2H), 6.84 – 6.76 (m, 2H), 6.72 (dd, *J* = 7.8, 1.8 Hz, 1H), 3.54 (s, 3H), 3.41 (s, 3H) ppm.

**13C NMR** (101 MHz, CDCl3) δ 161.2, 156.8, 152.5, 150.7, 139.0, 137.8, 134.5, 134.3, 134.2, 132.7, 130.5, 129.7, 128.8, 127.5, 127.4, 126.2, 122.3, 120.7, 119.4, 113.6, 113.1, 112.6, 107.4, 55.9, 55.7 ppm.

**M.P.** 195 ℃ - 197 ℃

**HRMS** (ESI, m/z): calculated for C28H22NO6SH+: 500.1168 (M+H)+, found: 500.1166.

**[α]21D** = -5.3 (c = 1.4 in CHCl3).

**HPLC** **analysis**: 80:20 *e.r.* (CHIRALCEL AS-H column, *i*PrOH/Hexane = 25:75, flow rate = 0.5 mL/min, λ = 220 nm, tminor = 52.3 min, tmajor= 66.2 min).

Light yellow oil, 68% yield, *E*/*Z* >20:1.

**1H NMR** (400 MHz, CDCl3) δ 8.49 (s, 1H), 7.94 (dd, *J* = 9.0, 2.1 Hz, 2H), 7.78 (s, 1H), 7.64 – 7.54 (m, 4H), 7.38 (t, *J* = 7.7 Hz, 2H), 7.11 – 7.03 (m, 2H), 6.81 – 6.72 (m, 2H), 6.68 (dd, *J* = 7.9, 1.6 Hz, 1H), 3.95 (s, 3H), 3.51 (s, 3H), 3.42 (s, 3H) ppm.

**13C NMR** (101 MHz, CDCl3) δ 167.2, 161.3, 156.4, 153.0, 150.8, 139.1, 137.9, 135.2, 134.0, 133.6, 131.3, 130.3, 129.7, 128.7, 127.6, 127.2, 126.5, 125.6, 124.9, 122.3, 120.7, 112.7, 112.5, 55.9, 55.7, 52.3 ppm.

**HRMS** (ESI, m/z): calculated for C29H24NO8SH+: 533.1270 (M+H)+, found: 533.1271.

**[α]21D** = -40.0 (c = 0.3 in CHCl3).

**HPLC** **analysis**: 87:13 *e.r.* (CHIRALPAK AD-H column, *i*PrOH/Hexane = 28:72, flow rate = 0.5 mL/min, λ = 254 nm, tmajor = 36.9 min, tminor= 43.1 min).

Light yellow oil, 91% yield, *E*/*Z* >20:1

**1H NMR** (400 MHz, CDCl3) δ 7.78 (s, 1H), 7.73 (d, *J* = 9.0 Hz, 1H), 7.64 – 7.57 (m, 3H), 7.57 – 7.51 (m, 1H), 7.40 – 7.33 (m, 2H), 7.10 – 7.03 (m, 1H), 6.96 (dd, *J* = 8.8, 2.3 Hz, 1H), 6.92 (d, *J* = 2.4 Hz, 1H), 6.85 – 6.73 (m, 3H), 6.63 (dd, *J* = 8.0, 1.5 Hz, 1H), 3.82 (s, 3H), 3.52 (s, 3H), 3.36 (s, 3H) ppm.

**13C NMR** (101 MHz, CDCl3) δ 161.4, 158.8, 155.3, 153.7, 150.9, 139.1, 138.2, 134.3, 133.8, 131.7, 130.0, 129.7, 129.4, 128.5, 127.1, 124.2, 122.4, 120.7, 117.1, 112.5, 111.4, 109.2, 103.1, 55.7, 55.4 ppm.

**HRMS** (ESI, m/z): calculated for C28H24O7SH+: 505.1321 (M+H)+, found: 505.1320.

**[α]21D** = -45.3 (c = 1.0 in CHCl3).

**HPLC** **analysis**: 99:1 *e.r.* (CHIRALPAK IC column, *i*PrOH/Hexane = 24:76, flow rate = 0.5 mL/min, λ = 220 nm, tmajor = 20.9 min, tminor= 23.3 min).

Light yellow oil, 85% yield, *E*/*Z* >20:1

**1H NMR** (400 MHz, CDCl3) δ 7.80 – 7.76 (m, 2H), 7.62 – 7.53 (m, 5H), 7.41 – 7.35 (m, 2H), 7.33 (dd, *J* = 8.7, 1.9 Hz, 1H), 7.11 – 7.04 (m, 2H), 6.83 – 6.74 (m, 3H), 3.57 (s, 3H), 3.49 (s, 3H) ppm.

**13C NMR** (101 MHz, CDCl3) δ 161.2, 155.4, 153.2, 150.8, 139.1, 137.8, 134.2, 133.8, 131.9, 130.2, 129.6, 129.5, 128.7, 127.3, 127.2, 126.9, 126.5, 122.3, 121.8, 120.6, 112.5, 112.5, 111.8, 56.0, 55.7 ppm.

**HRMS** (ESI, m/z): calculated for C27H21BrO6SH+: 553.0320 (M+H)+, found: 553.0320.

**[α]21D** = +19.5 (c = 4.9 in CHCl3).

**HPLC** **analysis**: >99:1 *e.r.* (CHIRALCEL AD-H column, *i*PrOH/Hexane = 24:76, flow rate = 0.5 mL/min, λ = 220 nm, tmajor = 19.7 min, tminor= 21.4 min).

Light yellow oil, 89% yield, *E*/*Z* >20:1.

**1H NMR** (400 MHz, CDCl3) δ 8.59 (s, 1H), 8.03 – 7.98 (m, 1H), 7.77 (s, 1H), 7.66 – 7.50 (m, 5H), 7.49 – 7.35 (m, 3H), 7.12 – 7.03 (m, 1H), 6.83 – 6.74 (m, 2H), 6.71 (dd, *J* = 8.2, 1.7 Hz, 1H), 3.54 (s, 3H), 3.48 (s, 3H) ppm.

**13C NMR** (101 MHz, CDCl3) δ 161.0, 151.1, 150.7, 149.2, 143.8, 138.9, 137.9, 137.5, 134.3, 130.4, 129.8, 129.4, 128.9, 127.8, 127.4, 127.4, 127.0, 124.8, 122.2, 121.0, 120.7, 112.5, 56.7, 55.6 ppm.

**HRMS** (ESI, m/z): calculated for C26H21NO6SH+: 476.1168 (M+H)+, found: 476.1168.

**[α]21D** = -19.7 (c = 1.0 in CHCl3).

**HPLC** **analysis**: 98:2 *e.r.* (CHIRALPAK AD-H column, *i*PrOH/Hexane = 50:50, flow rate = 0.5 mL/min, λ = 220 nm, tminor = 21.3 min, tmajor = 35.5 min).

Light yellow oil, 58% yield, *E*/*Z* >20:1.

**1H NMR** (400 MHz, CDCl3) δ 7.87 (d, *J* = 8.5 Hz, 1H), 7.69 – 7.62 (m, 2H), 7.62 – 7.54 (m, 2H), 7.44 – 7.35 (m, 2H), 7.21 (dd, *J* = 8.5, 7.3 Hz, 1H), 7.12 (ddd, *J* = 8.2, 7.2, 1.9 Hz, 1H), 6.90 – 6.80 (m, 4H), 4.17 – 4.04 (m, 2H), 3.65 (s, 3H), 2.16 (s, 3H), 1.58 (s, 9H), 1.29 (t, *J* = 7.2 Hz, 3H) ppm.

**13C NMR** (101 MHz, CDCl3) δ 161.4, 160.5, 151.6, 150.9, 149.0, 139.2, 137.3, 136.9, 134.4, 132.9, 130.2, 129.7, 129.3, 129.2, 127.3, 126.9, 126.1, 125.5, 122.4, 120.7, 114.5, 112.5, 112.3, 85.2, 61.8, 55.7, 27.9, 18.8, 14.0 ppm.

**HRMS** (ESI, m/z): calculated for C33H33NO9SNa+: 642.1774 (M+Na)+, found: 642.1772.

**[α]21D** = -58.1 (c = 1.0 in CHCl3).

**HPLC** **analysis**: 92:8 *e.r.* (CHIRALPAK AD-H column, *i*PrOH/Hexane = 20:80, flow rate = 0.5 mL/min, λ = 220 nm, tmajor = 21.6 min, tminor= 25.5 min).

Yellow oil, 60% yield, *E*/*Z* 5:1.

**1H NMR** (a mixture of *E*/*Z* 5:1 isomers, 400 MHz, CDCl3) δ 7.83 (s, 1H), 7.59 – 7.53 (m, 0.6H), 7.43 – 7.34 (m, 3.6H), 7.33 – 6.94 (m, 11.5H), 6.92 – 6.77 (m, 3.7H), 6.77 – 6.70 (m, 3.7H), 3.86 (s, 0.6H), 3.86 (s, 0.6H), 3.83 (s, 3H), 3.81 (s, 3H), 3.79 (s, 0.6H), 3.58 (s, 3H) ppm.

**13C NMR** (a mixture of *E*/*Z* 5:1 isomers, 101 MHz, CDCl3) δ 161.6, 159.7, 157.6, 152.3, 150.8, 142.7, 141.7, 139.3, 139.0, 137.8, 136.7, 134.9, 134.3, 134.1, 133.9, 131.4, 129.9, 129.9, 129.2, 128.7, 127.6, 127.4, 126.2, 124.0, 123.7, 123.5, 122.3, 121.3, 120.7, 119.0, 114.7, 114.2, 114.1, 112.6, 112.5, 104.3, 56.1, 55.7, 55.4 ppm.

**HRMS** (ESI, m/z): calculated for C32H26O7S2H+: 587.1198 (M+H)+, found: 587.1194.

**[α]21D** = -34.0 (c = 3.0 in CHCl3).

**HPLC analysis** for the *E* isomer: 94:6 *e.r.* (CHIRALPAK AD-H column, *i*PrOH/Hexane = 24:76, flow rate = 0.5 mL/min, λ = 254 nm, tmajor = 39.3 min, tminor= 41.5 min).

Light yellow oil, 65% yield, *E*/*Z* 2:1.

**1H NMR** (a mixture of *E*/*Z* 2:1 isomers, 400 MHz, CDCl3) δ 7.81 (d, *J* = 7.0 Hz, 1H), 7.57 – 7.46 (m, 5H), 7.43 – 7.30 (m, 12H), 7.24 – 7.14 (m, 1.5H), 7.01 – 6.86 (m, 5.5H), 6.76 (d, *J* = 8.7 Hz, 0.5H), 6.70 (s, 0.5H), 6.66 (d, *J* = 8.3 Hz, 1H), 3.84 (s, 1.5H), 3.78 (s, 3H), 3.31 (s, 1.5H), 3.30 (s, 3H) ppm.

**13C NMR** (a mixture of *E*/*Z* 2:1 isomers, 101 MHz, CDCl3) δ 162.8, 161.7, 157.4, 156.5, 154.0, 151.2, 151.0, 144.6, 144.0, 143.6, 140.7, 140.3, 139.8, 139.3, 139.2, 138.8, 134.6, 133.5, 133.2, 130.9, 130.8, 130.7, 129.9, 129.5, 129.3, 129.0, 128.6, 128.5, 128.1, 127.9, 127.4, 127.3, 127.3, 123.6, 123.0, 122.5, 121.2, 120.8, 119.8, 117.5, 112.6, 112.6, 109.3, 108.9, 56.0, 55.9, 55.3, 55.2 ppm.

**HRMS** (ESI, m/z): calculated for C29H24O6SNa+: 523.1191 (M+Na)+, found: 523.1193.

**[α]21D** = -82.0 (c = 3.0 in CHCl3).

**HPLC analysis** for the *E* isomer: 90.5:9.5 *e.r.* (CHIRALCEL OD-H column, *i*PrOH/Hexane = 20:80, flow rate = 0.5 mL/min, λ = 254 nm, tminor = 20.9 min, tmajor = 23.0 min).

Light yellow oil, 90% yield, *E*/*Z* 2:1.

**1H NMR** (a mixture of *E*/*Z* 2:1 isomers, 400 MHz, CDCl3) δ 7.74 – 7.66 (m, 3H), 7.62 – 7.54 (m, 2.5H), 7.49 – 7.41 (m, 3.5H), 7.16 – 7.09 (m, 1.5H), 6.98 (d, *J* = 8.5 Hz, 1H), 6.90 – 6.78 (m, 5H), 6.39 (d, *J* = 8.5 Hz, 1H), 6.31 (s, 0.5H), 3.75 (s, 1.5H), 3.72 (s, 3H), 3.26 (s, 1.5H), 3.09 (s, 3H), 2.83 – 2.51 (m, 6H), 1.76 – 1.63 (m, 6H) ppm.

**13C NMR** ((a mixture of *E*/*Z* 2:1 isomers, 101 MHz, CDCl3) δ 161.7, 161.5, 154.8, 154.4, 154.3, 153.2, 151.1, 151.0, 140.4, 139.3, 139.3, 138.6, 138.5, 138.0, 133.7, 131.6, 131.0, 129.7, 129.7, 129.5, 128.8, 128.6, 128.6, 127.3, 127.2, 127.2, 122.6, 122.5, 120.8, 120.7, 117.7, 115.8, 112.6, 110.7, 107.5, 55.9, 55.9, 55.2, 54.8, 30.0, 29.2, 28.5, 27.3, 23.3, 23.0, 23.0, 22.9 ppm.

**HRMS** (ESI, m/z): calculated for C27H26O6SNa+: 501.1348 (M+Na)+, found: 501.1348.

**[α]21D** = +3.2 (c = 3.0 in CHCl3).

**HPLC analysis** for the *E* isomer: 96.5:3.5 *e.r.* (CHIRALPAK AD-H column, *i*PrOH/Hexane = 24:76, flow rate = 0.5 mL/min, λ = 254 nm, tmajor = 14.6 min, tminor= 16.5 min)

### 5.2 Further Transformations of the Products

To a solution of compound **9a** (150.0 mg, 0.32 mmol) in THF (3 mL) was added CH3MgBr (3.0M in Et2O, 0.32 mL, 0.96 mmol) dropwise at -78 °C. The mixture was allowed to warm to 0 °C gradually and then stirred for an additional 30 min. The reaction was quenched with phosphate buffer (pH = 7.0, 5 mL) at 0 °C, and the mixture was extracted with EtOAc (50 mL x 3). The combined organic phases were washed sequentially with water (8 mL) and brine (8 mL), dried over anhydrous Na2SO4 and concentrated in *vacuo*. The residue was purified by flash chromatography on silica gel (EtOAc/hexanes =1:5) to provide **10a** (113.8 mg, 93% yield, 98:2 *e.r.*, *E*/*Z* >20:1) as a colorless oil.

**1H NMR** (400 MHz, CDCl3) δ 7.84 (d, *J* = 9.0 Hz, 1H), 7.77 – 7.67 (m, 2H), 7.58 (s, 1H), 7.52 – 7.43 (m, 3H), 7.41 (ddd, *J* = 8.4, 6.8, 1.4 Hz, 1H), 7.32 (tdd, *J* = 8.9, 7.2, 3.8 Hz, 3H), 6.99 (d, *J* = 9.1 Hz, 1H), 3.29 (s, 3H), 1.73 (s, 1H), 1.28 (br s, 3H), 1.17 (s, 3H) ppm.

**13C NMR** (101 MHz, CDCl3) δ 154.3, 150.3, 139.4, 136.1, 133.6, 133.0, 131.9, 129.2, 128.8, 128.3, 127.9, 127.3, 125.7, 124.2, 112.8, 111.8, 71.6, 55.5, 29.6, 28.7 ppm.

**HRMS** (ESI, m/z): calculated for C22H22O4SNa+: 405.1136 (M+Na)+, found: 405.1134.

**[α]21D** = +17.5 (c = 2.0 in CHCl3).

**HPLC** **analysis**: 98:2 *e.r.* (CHIRALPAK AD-H column, *i*PrOH/Hexane = 20:80, flow rate = 0.5 mL/min, λ = 254 nm, tminor = 26.8 min, tmajor = 29.2 min)

To a solution of compound **10a** (107.8 mg, 0.28 mmol) in DMF (2 mL) was added imidazole (114.4 mg, 1.68 mmol), TESCl (0.15 mL, 0.84 mmol) and DMAP (1.7 mg, 0.014 mmol) sequentially at 0 °C. The mixture was allowed to warm to room temperature and then stirred for an additional 1 h. The reaction was quenched with phosphate buffer (pH = 7.0, 10 mL) at 0 °C, and the mixture was extracted with EtOAc (50 mL x 3). The combined organic phases were washed sequentially with water (10 mL x 4) and brine (10 mL), dried over anhydrous Na2SO4 and concentrated in *vacuo*. The residue was purified by flash chromatography on silica gel (EtOAc/hexanes =1:20) to provide **S20** (123.8 mg, 89% yield, 98:2 *e.r.*, *E*/*Z* >20:1) as a colorless oil.

**1H NMR** (400 MHz, CDCl3) δ 7.81 (d, *J* = 9.0 Hz, 1H), 7.74 – 7.69 (m, 2H), 7.53 (s, 1H), 7.50 – 7.44 (m, 3H), 7.38 (ddd, *J* = 8.5, 6.8, 1.4 Hz, 1H), 7.33 – 7.27 (m, 3H), 6.94 (d, *J* = 9.0 Hz, 1H), 3.25 (s, 3H), 1.14 (s, 3H), 1.10 (s, 3H), 0.78 (t, *J* = 7.9 Hz, 9H), 0.37 – 0.28 (m, 6H) ppm.

**13C NMR** (101 MHz, CDCl3) δ 154.4, 151.9, 139.8, 134.8, 134.0, 132.8, 131.3, 129.3, 128.6, 128.1, 127.7, 126.8, 126.1, 123.9, 113.4, 111.5, 74.2, 54.9, 29.8, 28.9, 7.0, 6.2 ppm.

**HRMS** (ESI, m/z): calculated for C28H36O4SSiNa+: 519.2001 (M+Na)+, found: 519.2001.

**[α]21D** = -7.6 (c = 1.0 in CHCl3).

**HPLC** **analysis**: 98:2 *e.r.* (CHIRALCEL OD-H column, *i*PrOH/Hexane = 2:98, flow rate = 0.5 mL/min, λ = 220 nm, tminor = 18.9 min, tmajor = 23.2 min)

To a solution of compound **10a** (83.3 mg, 0.22 mmol) in THF (2 mL) was added NaH (60 % dispersion in mineral oil, 26.1 mg, 0.65 mmol) and methyl iodide (41 μL, 0.65 mmol) sequentially at 0 °C. The mixture was allowed to warm to room temperature gradually and then stirred for an additional 1 h. The reaction was quenched with phosphate buffer (pH = 7.0, 10 mL) at 0 °C, and the mixture was extracted with EtOAc (50 mL x 3). The combined organic phases were washed sequentially with water (10 mL) and brine (10 mL), dried over anhydrous Na2SO4 and concentrated in *vacuo*. The residue was purified by flash chromatography on silica gel (EtOAc/hexanes =1:10) to provide **S21** (76.0 mg, 87% yield, 98:2 *e.r.*, *E*/*Z* >20:1) as a white solid.

**1H NMR** (400 MHz, CDCl3) δ 7.84 (d, *J* = 9.0 Hz, 1H), 7.73 (d, *J* = 7.5 Hz, 1H), 7.70 (d, *J* = 8.5 Hz, 1H), 7.56 (s, 1H), 7.52 – 7.44 (m, 3H), 7.40 (ddd, *J* = 8.5, 6.8, 1.4 Hz, 1H), 7.35 – 7.27 (m, 3H), 6.97 (d, *J* = 9.0 Hz, 1H), 3.27 (s, 3H), 3.22 (s, 3H), 0.95 (s, 3H), 0.94 (s, 3H) ppm.

**13C NMR** (101 MHz, CDCl3) δ 154.6, 150.0, 139.6, 138.3, 133.8, 132.9, 131.9, 129.1, 128.5, 128.2, 127.9, 127.1, 125.5, 124.0, 112.7, 111.5, 76.3, 55.1, 51.6, 25.1, 24.2 ppm.

**HRMS** (ESI, m/z): calculated for C23H24O4SNa+: 419.1293 (M+Na)+, found: 419.1296.

**[α]21D** = +5.82 (c = 1.0 in CHCl3).

**HPLC** **analysis**: 98:2 *e.r.* (CHIRALPAK AD-H column, *i*PrOH/Hexane = 20:80, flow rate = 0.5 mL/min, λ = 254 nm, tmajor = 13.7 min, tminor= 15.4 min)

To a solution of compound **9a** (30.0 mg, 0.063 mmol) in THF (1 mL) was added *i*PrMgBr (2.0M in Et2O, 0.10 mL, 0.20 mmol) dropwise at -78 °C. The mixture was allowed to warm to 0 °C gradually and then stirred for an additional 30 min. The reaction was quenched with phosphate buffer (pH = 7.0, 5 mL) at 0 °C, and the mixture was extracted with EtOAc (30 mL x 3). The combined organic phases were washed sequentially with water (8 mL) and brine (8 mL), dried over anhydrous Na2SO4 and concentrated in *vacuo*. The residue was purified by flash chromatography on silica gel (EtOAc/hexanes =1:10) to provide **10b** (23.5 mg, 85% yield, 93:7 *e.r.*, *E*/*Z* >20:1) as a colorless oil.

**1H NMR** (400 MHz, CDCl3) δ 7.90 (d, *J* = 8.5 Hz, 1H), 7.83 (d, *J* = 9.0 Hz, 1H), 7.73 (d, *J* = 8.1 Hz, 1H), 7.55 – 7.45 (m, 4H), 7.44 – 7.38 (m, 1H), 7.37 – 7.29 (m, 3H), 6.95 (d, *J* = 9.1 Hz, 1H), 3.22 (s, 3H), 2.13 – 2.02 (m, 1H), 2.02 – 1.90 (m, 1H), 1.71 (s, 1H), 1.00 (d, *J* = 4.8 Hz, 3H), 0.98 (d, *J* = 4.7 Hz, 3H), 0.87 (d, *J* = 6.8 Hz, 3H), 0.80 (d, *J* = 6.8 Hz, 3H) ppm.

**13C NMR** (101 MHz, CDCl3) δ 154.3, 149.5, 140.2, 138.6, 134.0, 132.9, 132.1, 129.1, 128.9, 128.3, 127.8, 127.1, 126.6, 124.2, 112.6, 111.3, 82.0, 54.7, 35.7, 35.2, 18.4, 18.1, 17.7, 16.6 ppm.

**HRMS** (ESI, m/z): calculated for C26H30O4SNa+: 461.1762 (M+Na)+, found: 461.1763.

**[α]21D** = +11.3 (c = 1.0 in CHCl3).

**HPLC** **analysis**: 93:7 *e.r.* (CHIRALPAK AD-H column, *i*PrOH/Hexane = 20:80, flow rate = 0.5 mL/min, λ = 254 nm, tminor = 10.3 min, tmajor = 11.0 min)

NaH (60 % dispersion in mineral oil, 3.8 mg, 0.095 mmol) was added to isopropanol (1 mL) at 0 °C. The mixture was warmed to room temperature and stirred for 2 min. Then the mixture was added to a solution of compound **9a** (29.7 mg, 0.063 mmol) in THF (0.5 mL) dropwise at -20 °C. After being stirred for 30 min at -20 °C, the reaction was quenched with phosphate buffer (pH = 7.0, 5 mL). The mixture was extracted with EtOAc (50 mL x 3). The combined organic phases were washed sequentially with water (8 mL) and brine (8 mL), dried over anhydrous Na2SO4 and concentrated in *vacuo*. The residue was purified by flash chromatography on silica gel (EtOAc/hexanes =1:10) to provide **11a** (22.8 mg, 92% yield, 98:2 *e.r.*, *E*/*Z* >20:1) as a colorless oil.

**1H NMR** (400 MHz, CDCl3) δ 7.85 (d, *J* = 9.1 Hz, 1H), 7.74 (dd, *J* = 8.3, 1.3 Hz, 1H), 7.60 – 7.49 (m, 5H), 7.39 – 7.28 (m, 4H), 7.02 (d, *J* = 9.1 Hz, 1H), 3.87 (q, *J* = 7.1 Hz, 2H), 3.33 (s, 3H), 0.79 (t, *J* = 7.1 Hz, 3H) ppm.

**13C NMR** (101 MHz, CDCl3) δ 163.5, 154.3, 152.0, 138.3, 133.7, 133.0, 131.9, 131.1, 129.6, 128.6, 127.9, 127.2, 124.7, 124.0, 112.7, 111.8, 61.1, 55.7, 13.6 ppm.

**HRMS** (ESI, m/z): calculated for C22H20O5SH+: 397.1110 (M+H)+, found: 397.1110.

**[α]21D** = -0.5 (c = 1.0 in CHCl3).

**HPLC** **analysis**: 98:2 *e.r.* (CHIRALPAK AD-H column, *i*PrOH/Hexane = 24:76, flow rate = 0.5 mL/min, λ = 220 nm, tmajor = 15.6 min, tminor= 17.8 min)

NaH (60 % dispersion in mineral oil, 3.8 mg, 0.095 mmol) was added to isopropanol (1 mL) at 0 °C. The mixture was warmed to room temperature and stirred for 2 min. Then the mixture was added to a solution of compound **9a** (29.1 mg, 0.061 mmol) in THF (0.5 mL) dropwise at -20 °C. After being stirred for 30 min at -20 °C, the reaction was quenched with phosphate buffer (pH = 7.0, 5 mL). The mixture was extracted with EtOAc (50 mL x 3). The combined organic phases were washed sequentially with water (8 mL) and brine (8 mL), dried over anhydrous Na2SO4 and concentrated in *vacuo*. The residue was purified by flash chromatography on silica gel (EtOAc/hexanes =1:10) to provide **3** (21.8 mg, 87% yield, 97:3 *e.r.*, *E*/*Z* >20:1) as a colorless oil.

**1H**, **13C NMR** and **HRMS** data are the same as the previously reported analysis data of **3**.

**[α]21D** = -28.3 (c = 0.6 in CHCl3).

**HPLC** **analysis**: 97:3 *e.r.* (CHIRALPAK AD-H column, *i*PrOH/Hexane = 24:76, flow rate = 0.5 mL/min, λ = 254 nm, tmajor = 14.1 min, tminor= 19.5 min)

To a solution of propargyl alcohol (36.7 μL, 0.64 mmol) in THF (1 mL) was added NaH (60 % dispersion in mineral oil, 3.8 mg, 0.095 mmol) at 0 °C. The mixture was warmed to room temperature and stirred for 5 min. Then the mixture was added to a stirred solution of compound **9a** (30.2 mg, 0.064 mmol) in THF (0.6 mL) dropwise at -20 °C. After being stirred for 60 min at -20 °C, the reaction was quenched with phosphate buffer (pH = 7.0, 5 mL). The mixture was extracted with EtOAc (50 mL x 3). The combined organic phases were washed sequentially with water (8 mL) and brine (8 mL), dried over anhydrous Na2SO4 and concentrated in *vacuo*. The residue was purified by flash chromatography on silica gel (EtOAc/hexanes =1:10) to provide **11b** (20.6 mg, 79% yield, 96.5:3.5 *e.r.*, *E*/*Z* >20:1) as a colorless oil.

**1H NMR** (400 MHz, CDCl3) δ 7.86 (d, *J* = 9.0 Hz, 1H), 7.74 (dd, *J* = 8.4, 1.3 Hz, 1H), 7.59 – 7.50 (m, 5H), 7.40 – 7.29 (m, 4H), 7.02 (d, *J* = 9.0 Hz, 1H), 4.47 (d, *J* = 2.5 Hz, 2H), 3.34 (s, 3H), 2.31 (t, *J* = 2.5 Hz, 1H) ppm.

**13C NMR** (101 MHz, CDCl3) δ 162.6, 154.3, 153.8, 138.0, 133.8, 132.8, 132.1, 129.7, 129.6, 128.6, 128.6, 128.0, 127.3, 124.6, 124.1, 112.2, 111.8, 75.3, 55.7, 52.6 ppm.

**HRMS** (ESI, m/z): calculated for C23H18O5SNa+: 429.0773 (M+Na)+, found: 429.0774.

**[α]21D** = -11.9 (c = 1.0 in CHCl3).

**HPLC** **analysis**: 96.5:3.5 *e.r.* (CHIRALPAK AD-H column, *i*PrOH/Hexane = 24:76, flow rate = 0.5 mL/min, λ = 220 nm, tminor= 22.9 min, tmajor = 24.8 min)

To a solution of *L*-menthol (51.6 mg, 0.33 mmol) in THF (1 mL) was added NaH (60 % dispersion in mineral oil, 5.3 mg, 0.13 mmol) at 0 °C. The mixture was warmed to room temperature and stirred for 10 min. Then the mixture was added to a solution of compound **9a** (31.4 mg, 0.066 mmol) in THF (0.6 mL) dropwise at -20 °C. After being stirred for 60 min at -20 °C, the reaction was quenched with phosphate buffer (pH = 7.0, 5 mL). The mixture was extracted with EtOAc (50 mL x 3). The combined organic phases were washed sequentially with water (8 mL) and brine (8 mL), dried over anhydrous Na2SO4 and concentrated in *vacuo*. The residue was purified by flash chromatography on silica gel (EtOAc/hexanes =1:10) to provide **11c** (21.7 mg, 65% yield, > 20:1 *d.r.*, *E*/*Z* >20:1) as a colorless oil.

**1H NMR** (400 MHz, CDCl3) δ 7.85 (d, *J* = 9.0 Hz, 1H), 7.73 (dd, *J* = 8.3, 1.2 Hz, 1H), 7.62 – 7.57 (m, 2H), 7.57 – 7.51 (m, 2H), 7.50 (s, 1H), 7.39 – 7.28 (m, 4H), 6.99 (d, *J* = 9.1 Hz, 1H), 4.35 (td, *J* = 10.8, 4.3 Hz, 1H), 3.33 (s, 3H), 1.51 – 1.36 (m, 3H), 1.23 – 1.10 (m, 2H), 0.81 – 0.69 (m, 1H), 0.66 (d, *J* = 6.5 Hz, 3H), 0.59 (d, *J* = 7.0 Hz, 3H), 0.58 – 0.49 (m, 2H), 0.40 (d, *J* = 6.9 Hz, 3H), 0.12 – 0.01 (m, 1H) ppm.

**13C NMR** (101 MHz, CDCl3) δ 163.5, 154.4, 150.8, 138.4, 133.7, 133.2, 131.8, 129.7, 128.6, 128.5, 127.8, 127.3, 124.8, 124.0, 112.9, 111.6, 75.3, 55.5, 46.6, 39.9, 34.0, 31.2, 25.4, 22.8, 21.9, 20.9, 15.7 ppm.

**HRMS** (ESI, m/z): calculated for C30H34O5SNa+: 529.2025 (M+Na)+, found: 529.2029.

**[α]21D** = -33.8 (c = 1.0 in CHCl3).

To a solution of methylamine (2.0M in THF, 0.4 mL, 0.8 mmol) in THF (0.5 mL) was added NaH (60 % dispersion in mineral oil, 6.6 mg, 0.17 mmol) at 0 °C. The mixture was warmed to room temperature and stirred for 10 min. Then the mixture was added to a solution of compound **9a** (39.2 mg, 0.083 mmol) in THF (1 mL) dropwise at -20 °C. After being stirred for 60 min at -20 °C, the reaction was quenched with phosphate buffer (pH = 7.0, 5 mL). The mixture was extracted with EtOAc (50 mL x 3). The combined organic phases were washed sequentially with water (8 mL) and brine (8 mL), dried over anhydrous Na2SO4 and concentrated in *vacuo*. The residue was purified by flash chromatography on silica gel (EtOAc/hexanes =1:10) to provide **12** (26.6 mg, 84% yield, 98:2 *e.r.*, *E*/*Z* >20:1) as a colorless oil.

**1H NMR** (400 MHz, CDCl3) δ 7.89 (d, *J* = 9.0 Hz, 1H), 7.78 – 7.72 (m, 1H), 7.61 (s, 1H), 7.55 – 7.48 (m, 4H), 7.38 – 7.29 (m, 4H), 7.09 (d, *J* = 9.1 Hz, 1H), 5.79 (s, 1H), 3.43 (s, 3H), 2.47 (d, *J* = 5.0 Hz, 3H) ppm.

**13C NMR** (101 MHz, CDCl3) δ 164.1, 154.6, 145.0, 138.5, 135.4, 133.6, 132.9, 132.6, 129.5, 128.8, 128.6, 128.1, 127.8, 124.7, 124.5, 112.2, 111.8, 56.1, 26.3 ppm.

**HRMS** (ESI, m/z): calculated for C21H19NO4SH+: 382.1113 (M+H)+, found: 382.1114.

**[α]21D** = +24.1 (c = 1.0 in CHCl3).

**HPLC** **analysis**: 98:2 *e.r.* (CHIRALPAK AD-H column, *i*PrOH/Hexane = 30:70, flow rate = 0.5 mL/min, λ = 254 nm, tmajor = 15.7 min, tminor= 17.9 min)

To a solution of **9a** (89.0 mg, 0.51 mmol) in THF (1 mL) was added *n*BuLi (2.0 M in cyclohexane, 0.25 mL, 0.5 mmol) at -20 °C. The mixture was warmed to room temperature and stirred for 5 min. Then the mixture was added to a solution of compound **9a** (80.0 mg, 0.17 mmol) in THF (1.5 mL) dropwise at -20 °C. After being stirred for 20 min at -20 °C, the reaction was quenched with phosphate buffer (pH = 7.0, 5 mL). The mixture was extracted with EtOAc (50 mL x 3). The combined organic phases were washed sequentially with water (8 mL) and brine (8 mL), dried over anhydrous Na2SO4 and concentrated in *vacuo*. The residue was purified by flash chromatography on silica gel (EtOAc/hexanes =2:1) to provide **S22** (58.7 mg, 84% yield, 98:2 *e.r.*, *E*/*Z* >20:1) as a colorless oil.

**1H NMR** (400 MHz, CDCl3) δ 7.89 (d, *J* = 9.1 Hz, 1H), 7.75 (dd, *J* = 7.5, 1.9 Hz, 1H), 7.62 (s, 1H), 7.57 – 7.49 (m, 4H), 7.39 – 7.30 (m, 4H), 7.08 (d, *J* = 9.1 Hz, 1H), 6.30 (s, 1H), 3.42 (s, 3H), 3.23 – 3.11 (m, 1H), 3.09 – 2.94 (m, 3H), 1.43 (s, 1H) ppm.

**13C NMR** (101 MHz, CDCl3) δ 164.1, 154.6, 145.1, 138.4, 135.4, 133.7, 132.8, 132.5, 129.5, 128.6, 128.0, 127.9, 124.6, 124.6, 112.0, 111.8, 61.4, 56.0, 41.7 ppm.

**HRMS** (ESI, m/z): calculated for C22H21NO5SH+: 412.1219 (M+H)+, found: 412.1222.

**[α]21D** = +15.1 (c = 0.3 in CHCl3).

**HPLC** **analysis**: 98:2 *e.r.* (CHIRALCEL AS-H column, *i*PrOH/Hexane = 30:70, flow rate = 0.5 mL/min, λ = 220 nm, tminor = 28.1 min, tmajor = 42.0 min)

To a solution of compound **S22** (30.0 mg, 0.073 mmol) in DCM (1.5 mL) was added diethylaminosulfur trifluoride (14.4 μL, 0.11 mmol) dropwise at -78 °C. The mixture was stirred for an additional 1h at -78 °C. Then K2CO3 (30.0 mg, 0.22 mmol) was added, and the mixture was allowed to warm to room temperature. The reaction mixture was poured into a saturated solution of NaHCO3 (10 mL) and extracted with DCM. The combined organic phases were washed sequentially with water (8 mL) and brine (8 mL), dried over anhydrous Na2SO4 and concentrated in *vacuo*. The residue was purified by flash chromatography on silica gel (EtOAc/hexanes =1:10) to provide **13** (22.5 mg, 78% yield, 98:2 *e.r.*, *E*/*Z* >20:1) as a colorless oil.

**1H NMR** (400 MHz, CDCl3) δ 7.84 (d, *J* = 9.0 Hz, 1H), 7.77 (s, 1H), 7.73 (dd, *J* = 8.0, 1.6 Hz, 1H), 7.56 – 7.47 (m, 4H), 7.35 – 7.27 (m, 4H), 7.02 (d, *J* = 9.1 Hz, 1H), 3.90 – 3.79 (m, 1H), 3.78 – 3.69 (m, 3H), 3.34 (s, 3H) ppm.

**13C NMR** (101 MHz, CDCl3) δ 162.3, 154.7, 147.8, 138.8, 133.5, 133.3, 131.6, 129.4, 128.7, 128.5, 128.5, 127.8, 127.0, 125.0, 123.8, 113.2, 112.0, 68.0, 55.8, 54.7 ppm.

**HRMS** (ESI, m/z): calculated for C22H19NO4SH+: 394.1113 (M+H)+, found: 394.1117.

**[α]21D** = -156.5 (c = 0.3 in CHCl3).

**HPLC** **analysis**: 98:2 *e.r.* (CHIRALCEL AS-H column, *i*PrOH/Hexane = 30:70, flow rate = 0.5 mL/min, λ = 254 nm, tmajor = 33.5 min, tminor = 46.6 min)

To a solution of compound **11b** (11.9 mg, 0.029 mmol) in DCM (1 mL) and H2O (1 mL) was added BnN3 (4.3 mg, 0.032 mmol), CuSO4 (1.0 mg, 0.006 mmol) and sodium ascorbate (2.3 mg, 0.012 mmol) sequentially at room temperature. After being stirred for 2 h, the reaction mixture was cooled to 0 °C and quenched with a saturated aqueous solution of NaHCO3 (5 mL). The mixture was extracted with DCM (50 mL x 3). The combined organic phases were washed sequentially with water (8 mL) and brine (8 mL), dried over anhydrous Na2SO4 and concentrated in *vacuo*. The residue was purified by flash chromatography on silica gel (EtOAc/hexanes =1:10) to provide **14** (14.9 mg, 95% yield, 96.5:3.5 *e.r.*, *E*/*Z* >20:1) as a colorless oil.

**1H NMR** (400 MHz, CDCl3) δ 7.73 (d, *J* = 9.1 Hz, 1H), 7.71 – 7.66 (m, 1H), 7.55 – 7.48 (m, 5H), 7.38 – 7.29 (m, 7H), 7.20 – 7.14 (m, 2H), 6.90 (d, *J* = 9.1 Hz, 1H), 6.69 (s, 1H), 5.35 (s, 2H), 4.97 (d, *J* = 1.9 Hz, 2H), 3.25 (s, 3H) ppm.

**13C NMR** (101 MHz, CDCl3) δ 163.3, 154.3, 152.6, 138.1, 134.5, 133.8, 132.8, 131.8, 130.4, 129.6, 129.3, 129.0, 128.6, 128.4, 128.1, 127.9, 127.3, 124.8, 124.0, 123.0, 112.4, 112.0, 58.7, 55.7, 54.2 ppm.

**HRMS** (ESI, m/z): calculated for C30H25N3O5SH+: 540.1593 (M+H)+, found: 540.1600.

**[α]21D** = +2.4 (c = 1.0 in CHCl3).

**HPLC** **analysis**: 96.5:3.5 *e.r.* (CHIRALPAK AD-H column, *i*PrOH/Hexane = 50:50, flow rate = 0.5 mL/min, λ = 220 nm, tmajor = 25.0 min, tminor= 27.4 min)

In a glove box, Pd2dba3 (3.9 mg, 0.0043 mmol) and *t*Bu3P.HBF4 (2.5 mg, 0.0086 mmol) were dissolved in THF (0.6 mL) and diisopropylamine (0.3 mL). The mixture was stirred at room temperature for 15 min. Then compound **9w** (40.0 mg, 0.072 mmol) and zinc chloride (3.0 mg, 0.022 mmol) were added. The mixture was stirred for 15 min to dissolve the solid, and then phenylacetylene (20 μL, 0.18 mmol) was added. The resulting mixture was stirred at room temperature for 2.5 h, and then diluted with EtOAc (10 mL), filtrated through a pad of silica gel. The filtrate was concentrated in *vacuo* and the residue was purified by flash chromatography on silica gel (EtOAc/hexanes =1:10) to provide **15** (33.9 mg, 82% yield, > 99:1 *e.r.*, *E*/*Z* >20:1) as a yellow solid.

**1H NMR** (400 MHz, CDCl3) δ 7.94 (d, *J* = 1.6 Hz, 1H), 7.82 – 7.78 (m, 2H), 7.63 – 7.54 (m, 6H), 7.48 (dd, *J* = 8.8, 1.7 Hz, 1H), 7.40 – 7.34 (m, 5H), 7.09 – 7.01 (m, 2H), 6.81 – 6.74 (m, 2H), 6.68 (dd, *J* = 7.8, 1.7 Hz, 1H), 3.52 (s, 3H), 3.40 (s, 3H) ppm.

**13C NMR** (101 MHz, CDCl3) δ 161.3, 155.2, 153.1, 150.8, 139.1, 137.9, 134.0, 132.3, 131.9, 131.7, 131.4, 130.1, 129.7, 128.7, 128.5, 128.4, 128.2, 127.2, 124.9, 123.5, 122.3, 120.6, 118.7, 112.6, 112.5, 89.8, 89.6, 55.8, 55.7 ppm.

**HRMS** (ESI, m/z): calculated for C35H26O6SNa+: 597.1348 (M+Na)+, found: 597.1348.

**[α]21D** = -8.2 (c = 1.0 in CHCl3).

**HPLC** **analysis**: > 99:1 *e.r.* (CHIRALCEL IA column, *i*PrOH/Hexane = 24:76, flow rate = 0.5 mL/min, λ = 220 nm, tmajor = 30.4 min, tminor = 35.3 min)

## **6. Supplementary Data for DFT Calculations on the Rotation Barrier**

In order to explore the possibility of racemization of the axially chiral styrenes in our study, the energetic barriers of the racemization process was investigated computationally. The ground-stage structure (**9a**) and two transition states (**TS9a**, **TS9a’**) corresponding to the rotation along two directions were located. The rotational barrier (ΔG‡) for enantiomerization was obtained as the Gibbs free energy difference from the ground-state structure to the more stable transition state. The rate constants for enantiomerization (*k*ent) and racemization (*k*rac), and half-life for racemization (*t*1/2) were calculated based on the following equations:9

where the transmission coefficient *κ* is set as 1, Boltzmann constant *k*B = 1.3806503× 10-23 J·K-1, Planck constant *h* = 6.62606876×10-34 J·s, idea gas constant *R* = 8.314472 J·mol-1·K-1, T = 373.15 K.

The DFT calculation results are shown below: ΔG‡ =30.1 kcal/mol, and at 100 ℃ (373.15 K), *k*rac= 3.56 ×10-5 s-1, *t*1/2 = 5.4 h; at 25 ℃ (298.15 K), *k*rac= 1.04 ×10-9 s-1, *t*1/2 = 21.2 years.

**Supplementary Table 5.** Computationally derived energy scans for **9a**. Dihedral angles were scanned from -180° to 180° in 5° increments.

| **Dihedral**  **angle** | **∆E**  **/kcal·mol-1** | **Dihedral**  **angle** | **∆E**  **/kcal·mol-1** | **Dihedral**  **angle** | **∆E**  **/kcal·mol-1** | **Dihedral**  **angle** | **∆E**  **/kcal·mol-1** |
| --- | --- | --- | --- | --- | --- | --- | --- |
| -175 | 25.0 | -85 | 0.6 | 5 | 24.4 | 95 | 1.9 |
| -170 | 22.5 | -80 | 1.3 | 10 | 26.5 | 100 | 2.4 |
| -165 | 20.0 | -75 | 2.3 | 15 | 28.4 | 105 | 3.4 |
| -160 | 17.6 | -70 | 3.2 | 20 | 30.1 | 110 | 4.7 |
| -155 | 15.3 | -65 | 3.5 | 25 | 11.3 | 115 | 5.9 |
| -150 | 13.2 | -60 | 3.9 | 30 | 9.7 | 120 | 6.9 |
| -145 | 11.3 | -55 | 4.5 | 35 | 8.2 | 125 | 7.9 |
| -140 | 9.4 | -50 | 5.2 | 40 | 7.0 | 130 | 9.3 |
| -135 | 7.7 | -45 | 6.2 | 45 | 6.0 | 135 | 10.8 |
| -130 | 6.4 | -40 | 7.4 | 50 | 5.1 | 140 | 12.6 |
| -125 | 4.8 | -35 | 8.8 | 55 | 4.5 | 145 | 14.5 |
| -120 | 3.3 | -30 | 10.4 | 60 | 4.1 | 150 | 16.6 |
| -115 | 2.2 | -25 | 12.1 | 65 | 3.9 | 155 | 18.9 |
| -110 | 1.4 | -20 | 13.5 | 70 | 1.4 | 160 | 21.5 |
| -105 | 0.7 | -15 | 15.5 | 75 | 1.0 | 165 | 23.9 |
| -100 | 0.2 | -10 | 17.6 | 80 | 0.8 | 170 | 25.6 |
| -95 | 0.0 | -5 | 19.8 | 85 | 0.9 | 175 | 27.3 |
| -90 | 0.1 | 0 | 22.1 | 90 | 1.3 | 180 | 28.8 |

Computational Methods

All calculations were carried out using the Gaussian 16 C.01 program package. The geometry optimizations were performed using hybrid B3LYP exchange correlation.13-15 The 6-31G(d, p) basis set16-18 was used for H, C, O, and S atoms. Vibrational frequency calculations were performed (at 303.15 K) to characterize the nature of each stationary point. A tight convergence (10-12 au) criterion was employed, and the solvent toluene (ε= 2.40) was considered using the SMD19 continuum solvent model (UFF radii). Single-point calculations were carried out for each optimized structure by using M06-2X functional20,21 and Def2-TZVP basis sets.22,23

**Cartesian Coordinates and Energies of the Optimized Structures**

**9a**

Sum of electronic and thermal Free Energies @ B3lYP/6-31g(d,p) = -1890.94142800 a.u

Single point energy @ M06-2X/Def2-TZVP = -1891.56059590 a.u

S -3.35266200 3.68797100 -1.20061200

C -2.22046500 2.35624700 -1.79565300

C -0.79157700 2.71249000 -1.96228200

C -0.34469100 3.08687500 -3.22967300

C -3.21881800 5.01559000 -2.40595600

C -4.04776900 4.99754500 -3.53013700

C -2.31700800 6.05523500 -2.17382900

C -3.96213400 6.04576700 -4.44499200

H -4.75357200 4.18675100 -3.67326200

C -2.24071400 7.09738200 -3.09897500

H -1.70351400 6.05201700 -1.28005100

C -3.05875200 7.09092100 -4.23077900

H -4.60605600 6.05147200 -5.31928300

H -1.54767900 7.91589500 -2.93008100

H -2.99906100 7.90738600 -4.94472000

O -2.80093100 4.18252800 0.07477300

O -4.73361800 3.17053300 -1.25544300

C -2.81950000 1.17383700 -1.98247800

H -3.88893800 1.08581500 -1.82069300

C 0.12772500 2.66207600 -0.86692900

C -0.25219000 2.26084900 0.44466200

C 1.49949500 3.01640200 -1.09301900

C 1.00981100 3.44426500 -3.44078600

C 0.66959900 2.21531000 1.46579100

H -1.28526400 2.00021200 0.64106300

C 2.42370900 2.96120300 -0.01455500

C 1.90055000 3.40746300 -2.39416600

H 1.34866900 3.73760300 -4.42671400

C 2.02213400 2.56836500 1.24041100

H 0.35405200 1.90680600 2.45840900

H 3.45896500 3.23264000 -0.20497400

H 2.93949900 3.67827700 -2.56279000

H 2.73577500 2.52712700 2.05800500

O -1.27527300 3.08121800 -4.22189200

C -0.90743600 3.52823200 -5.52280600

H -1.81797000 3.47270000 -6.12167400

H -0.55151200 4.56510100 -5.50934100

H -0.14432100 2.88189000 -5.97261500

C -2.11224000 -0.06667800 -2.39693400

O -0.96198700 -0.17846500 -2.74487200

O -2.99397300 -1.11182900 -2.30774000

C -2.55647200 -2.37343800 -2.71518700

C -2.28537900 -3.33834800 -1.75825300

C -2.48154300 -2.66387500 -4.09029200

C -1.92348000 -4.62936800 -2.15477400

H -2.36263500 -3.06883600 -0.70977400

C -2.11479900 -3.95656600 -4.47917300

C -1.83819300 -4.92830200 -3.51190700

H -1.71010700 -5.38618000 -1.40698300

H -2.04524300 -4.21080800 -5.53014200

H -1.55634200 -5.92669500 -3.83342100

O -2.78724600 -1.64414500 -4.93387600

C -2.69028500 -1.87985800 -6.33458500

H -1.66912500 -2.15189200 -6.62801000

H -3.38548300 -2.66282100 -6.66194500

H -2.96211100 -0.93815300 -6.81454000

**TS9a**

Sum of electronic and thermal Free Energies @ B3lYP/6-31g(d,p) = -1890.89338400 a.u

Single point energy @ M06-2X/Def2-TZVP = -1891.56059590 a.u

S -3.33860000 3.76500000 -3.18960000

C -2.01820000 2.50790000 -2.55020000

C -0.68750000 2.96870000 -2.06110000

C -0.44460000 4.32710000 -1.77290000

C -2.46420000 4.93670000 -4.24690000

C -1.52410000 4.47300000 -5.16840000

C -2.86800000 6.27150000 -4.22340000

C -0.95690000 5.37880000 -6.06540000

H -1.23770000 3.42660000 -5.19070000

C -2.30350000 7.16390000 -5.13600000

H -3.61200000 6.59730000 -3.50500000

C -1.34610000 6.72010000 -6.05080000

H -0.21740000 5.03160000 -6.78050000

H -2.61400000 8.20450000 -5.13150000

H -0.90710000 7.41860000 -6.75710000

O -4.04490000 4.46500000 -2.10320000

O -4.18920000 2.99420000 -4.12730000

C -2.55060000 1.30110000 -2.83100000

H -3.52670000 1.33610000 -3.31970000

C 0.47650000 2.09890000 -1.96040000

C 0.40740000 0.70120000 -1.73980000

C 1.79870000 2.66380000 -1.98890000

C 0.86350000 4.87500000 -1.74400000

C 1.53190000 -0.09920000 -1.71190000

H -0.53700000 0.25720000 -1.47830000

C 2.93920000 1.81940000 -1.99680000

C 1.95470000 4.06980000 -1.92480000

H 0.99080000 5.94120000 -1.60890000

C 2.81610000 0.45300000 -1.89070000

H 1.42060000 -1.16370000 -1.52770000

H 3.91990000 2.28440000 -2.05520000

H 2.95330000 4.49630000 -1.95790000

H 3.69420000 -0.18530000 -1.89020000

O -1.52300000 5.10110000 -1.54180000

C -1.38240000 6.47560000 -1.19410000

H -2.39610000 6.82530000 -0.99800000

H -0.78070000 6.59050000 -0.28570000

H -0.94400000 7.06260000 -2.00810000

C -2.15060000 -0.13370000 -2.79540000

O -1.60370000 -0.71060000 -3.70090000

O -2.64970000 -0.73770000 -1.67420000

C -2.68060000 -2.13740000 -1.63790000

C -1.88590000 -2.81090000 -0.72480000

C -3.59230000 -2.82210000 -2.46390000

C -1.96880000 -4.20370000 -0.62630000

H -1.21550000 -2.23960000 -0.09060000

C -3.66270000 -4.21550000 -2.36520000

C -2.85180000 -4.89570000 -1.45070000

H -1.34730000 -4.73410000 0.08780000

H -4.34890000 -4.77200000 -2.99240000

H -2.92300000 -5.97750000 -1.38650000

O -4.34240000 -2.05000000 -3.28990000

C -5.24910000 -2.69460000 -4.18050000

H -4.72460000 -3.36520000 -4.87160000

H -6.01750000 -3.25630000 -3.63540000

H -5.72590000 -1.89440000 -4.74850000

**TS9a’**

Sum of electronic and thermal Free Energies @ B3lYP/6-31g(d,p) = -1890.94043300 a.u

Single point energy @ M06-2X/Def2-TZVP = -1891.60763237 a.u

S -3.08421200 2.95693700 -3.37016800

C -2.12115000 2.70045500 -1.80699700

C -0.66603500 2.95801400 -1.88211800

C -0.23399800 4.28247200 -1.81570000

C -2.75473900 1.48923200 -4.36075700

C -3.56159000 0.36015600 -4.19535300

C -1.71744000 1.51832000 -5.29485900

C -3.31103900 -0.76659100 -4.97725300

H -4.37862600 0.37350700 -3.48220700

C -1.47872700 0.38394500 -6.07103600

H -1.12237000 2.41616200 -5.41638400

C -2.27008300 -0.75511600 -5.90970000

H -3.93314900 -1.64921500 -4.86410100

H -0.67677600 0.39289200 -6.80279000

H -2.07969700 -1.63523700 -6.51692000

O -2.50315000 4.10778100 -4.08116900

O -4.51672200 2.93947300 -3.01534400

C -2.86103900 2.33531900 -0.75295700

H -3.92896600 2.18563300 -0.87163300

C 0.28571600 1.90143000 -2.03530400

C -0.07868800 0.52576200 -2.07008100

C 1.67621900 2.23270100 -2.16247600

C 1.14046500 4.60001000 -1.95037900

C 0.87271900 -0.45704500 -2.22837900

H -1.12262000 0.25063900 -1.96944300

C 2.63099500 1.19264100 -2.32440700

C 2.06305700 3.59569600 -2.12299800

H 1.46570200 5.63236900 -1.90793200

C 2.24326100 -0.12649200 -2.35816500

H 0.56703200 -1.49936400 -2.25523200

H 3.67964600 1.46320800 -2.41898500

H 3.11632100 3.84372400 -2.22427200

H 2.98135700 -0.91344300 -2.48212000

O -1.19355600 5.21336100 -1.58754300

C -0.88844200 6.59074000 -1.78653300

H -1.83391400 7.12211100 -1.66687300

H -0.17547100 6.96086400 -1.03985000

H -0.49895200 6.77413700 -2.79432700

C -2.31689900 2.13563000 0.61642300

O -1.22094200 2.43441300 1.02277600

O -3.29625800 1.56378900 1.38676300

C -2.97560300 1.20457500 2.69671400

C -3.56195300 1.89419100 3.74606300

C -2.13358600 0.09971100 2.92526000

C -3.31199600 1.49938300 5.06390800

H -4.20915900 2.73546500 3.51947400

C -1.88239000 -0.28419100 4.24669300

C -2.47116300 0.41603600 5.30479700

H -3.76894100 2.03891200 5.88711300

H -1.23466000 -1.12735900 4.45599200

H -2.26610700 0.10137700 6.32385800

O -1.63997700 -0.51297000 1.81867900

C -0.68296700 -1.55315300 1.99402700

H 0.19475900 -1.20168300 2.54913400

H -1.11775300 -2.42101500 2.50538700

H -0.37529800 -1.84542800 0.98892600

## **7. Supplementary Data for Experimental Racemization Studies**

The axially chiral product **9a**, **9m** and **9n** (0.005 mmol) were dissolved in toluene (100 mL) separately and heated at 100 ºC (373.15 K) for 10 h. The *ee* value was tested every one hour *via* HPLC on chiral stationary phase. The rotation barrier was determined according to the literature method.24-29

**Supplementary Table 6**. The Detailed Racemization Result of **9a**, **9m** and **9n** over 24 h

| Time/h | *ee* (%)  (**9a**, 100 ºC) | *ee* (%)  (**9a**, 75 ºC) | *ee* (%)  (**9a**, 50 ºC) | *ee* (%)  (**9m**, 100 ºC) | *ee* (%)  (**9n**, 100 ºC) |
| --- | --- | --- | --- | --- | --- |
| 0 | 99.45 | 99.45 | 99.45 | 97.27 | 85.01 |
| 1 | 89.68 | - | - | 93.95 | 82.2 |
| 2 | 82.53 | 97.54 | 99.21 | 90.67 | 80.1 |
| 3 | 73.42 | - | - | 87.15 | 78.06 |
| 4 | 65.87 | 96.6 | 99.01 | 83.9 | 75.32 |
| 5 | 60.73 | - | - | 80.55 | 73.49 |
| 6 | 53.53 | 95.29 | 98.75 | 77.81 | 71.48 |
| 7 | 48.45 | - | - | 74.76 | 69.71 |
| 8 | 43.87 | 91.23 | - | 71.52 | 67.6 |
| 9 | 39.14 | - | 98.38 | 68.66 | 66.14 |
| 10 | 36.07 | 89.98 | - | 66.87 | 64.49 |
| 11 | - | - | - | 63.76 | 63.38 |
| 12 | 28.24 | 87.42 | 98.17 | 61.18 | 62.16 |
| 13 | - | - | - | - | - |
| 14 | 21.79 | 86.76 | - | - | - |
| 15 | - | - | - | 54.61 | - |
| 16 | 16.83 | 83.94 | 97.96 | - | 56.27 |
| 17 | - | - | - | - | - |
| 18 | 14.98 | 82.38 | - | 49.21 | - |
| 19 | - | - | - | - | - |
| 20 | - | 80.28 | 97.43 | - | 50.58 |
| 21 | 9.34 | - | - | 45.25 | - |
| 22 | - | 78.24 | - | - | - |
| 23 | - | - | - | - | - |
| 24 | 7.12 | 76.82 | 97.09 | 39.01 | 47.21 |

**a) Determination of *t*1/2rac and Δ*G*‡ for 9a.**

The rotation barrier of **9a** was determined according to the literature method (*t*1/2rac = 6.7 h at 100 ºC (373.15 K), toluene; Δ*G*‡ = 30.26 kcal/mol).

**Supplementary Table 7**. Calculation Result for Racemization Test of **9a** at 100 ºC

| Time (s) | *ee* (%) | *ee*0/*ee*t | ln(*ee*0/*ee*t) |
| --- | --- | --- | --- |
| 0 | 99.45 | 1 | 0 |
| 3600 | 89.68 | 1.108943 | 0.103407 |
| 7200 | 82.53 | 1.205016 | 0.186493 |
| 10800 | 73.42 | 1.354536 | 0.303459 |
| 14400 | 65.87 | 1.509792 | 0.411972 |
| 18000 | 60.73 | 1.637576 | 0.493217 |
| 21600 | 53.53 | 1.857837 | 0.619413 |
| 25200 | 48.45 | 2.052632 | 0.719123 |
| 28800 | 43.87 | 2.266925 | 0.818424 |
| 32400 | 39.14 | 2.540879 | 0.932510 |
| 36000 | 36.07 | 2.757139 | 1.014194 |

**Supplementary Figure 182**. Rotation Barrier Analysis of **9a**

ln(*ee*0/*ee*t)=2*k*ent*t+C*

therefore, *k*ent=1/2 slope = 1.43 x 10-5

*k*rac=2*k*ent=2.86 x 10-5 s-1

*t*1/2rac=ln2/*k*rac= 2.42 x 104 s = 6.7 h

Δ*G*‡ = -*R*Tln(*k*ent*h*/kBT) = 126.70 kJ/mol = 30.26 kcal/mol

**b) Determination of *t*1/2rac and Δ*G*‡ for 9m**

The rotation barrier of **9m** was determined according to the literature method (*t*1/2rac = 18.1 h at 100 ºC (373.15 K), toluene; Δ*G*‡ = 30.99 kcal/mol).

**Supplementary Table 8**. Calculation Result for Racemization Test of **9m** at 100 ºC

| Time (s) | *ee* (%) | *ee*0/*ee*t | ln(*ee*0/*ee*t) |
| --- | --- | --- | --- |
| 0 | 97.27 | 1 | 0 |
| 3600 | 93.95 | 1.035338 | 0.034728 |
| 7200 | 90.67 | 1.072791 | 0.070264 |
| 10800 | 87.15 | 1.116122 | 0.109860 |
| 14400 | 83.90 | 1.159356 | 0.147865 |
| 18000 | 80.55 | 1.207573 | 0.188613 |
| 21600 | 77.81 | 1.250096 | 0.223221 |
| 25200 | 74.76 | 1.301097 | 0.263208 |
| 28800 | 71.52 | 1.360039 | 0.307513 |
| 32400 | 68.66 | 1.416691 | 0.348324 |
| 36000 | 66.87 | 1.454613 | 0.374740 |

**9m**

**Supplementary Figure 183**. Rotation Barrier Analysis of **9m**

ln(*ee*0/*ee*t)=2*k*ent*t+C*

therefore, *k*ent=1/2 slope = 5.33 x 10-6

*k*rac=2*k*ent=1.07 x 10-5 s-1

*t*1/2rac=ln2/*k*rac= 6.50 x 104 s = 18.1 h

Δ*G*‡ = -*R*Tln(*k*ent*h*/kBT) = 129.76 kJ/mol = 30.99 kcal/mol

**b) Determination of *t*1/2rac and Δ*G*‡ for 9n**

The rotation barrier of **9n** was determined according to the literature method (*t*1/2rac = 25.1 h at 100 ºC (373.15 K), toluene; Δ*G*‡ = 31.24 kcal/mol).

**Supplementary Table 9**. Calculation Result for Racemization Test of **9n** at 100 ºC

| Time (s) | *ee* (%) | *ee*0/*ee*t | ln(*ee*0/*ee*t) |
| --- | --- | --- | --- |
| 0 | 85.01 | 1 | 0 |
| 3600 | 82.20 | 1.034185 | 0.033614 |
| 7200 | 80.10 | 1.061298 | 0.059493 |
| 10800 | 78.06 | 1.089034 | 0.085291 |
| 14400 | 75.32 | 1.128651 | 0.121023 |
| 18000 | 73.49 | 1.156756 | 0.145620 |
| 21600 | 71.48 | 1.189284 | 0.173351 |
| 25200 | 69.71 | 1.219481 | 0.198425 |
| 28800 | 67.60 | 1.257544 | 0.229161 |
| 32400 | 66.14 | 1.285304 | 0.250995 |
| 36000 | 64.49 | 1.318189 | 0.276259 |

**9n**

**Supplementary Figure 184**. Rotation Barrier Analysis of **9n**

ln(*ee*0/*ee*t)=2*k*ent*t+C*

therefore, *k*ent=1/2 slope = 3.84 x 10-6

*k*rac=2*k*ent=7.67 x 10-6 s-1

*t*1/2rac=ln2/*k*rac= 9.03 x 104 s = 25.1 h

Δ*G*‡ = -*R*Tln(*k*ent*h*/kBT) = 130.78 kJ/mol = 31.24 kcal/mol

## **8. Supplementary References**

1. He, M., Struble, J.R. & Bode, J.W. Highly Enantioselective Azadiene Diels−Alder Reactions Catalyzed by Chiral N-Heterocyclic Carbenes. *J. Am. Chem. Soc.* **128**, 8418-8420 (2006).

2. Wu, X. *et al.* Sulfinate and Carbene Co-catalyzed Rauhut-Currier Reaction for Enantioselective Access to Azepino 1,2-a indoles. *Angew. Chem. Int. Ed.* **58**, 477-481 (2019).

3. Zhao, C., Li, F. & Wang, J. N-Heterocyclic Carbene Catalyzed Dynamic Kinetic Resolution of Pyranones. *Angew. Chem. Int. Ed.* **55**, 1820-1824 (2016).

4. Zhuo, S. *et al.* Access to All-Carbon Spirocycles through a Carbene and Thiourea Cocatalytic Desymmetrization Cascade Reaction. *Angew. Chem. Int. Ed.* **58**, 1784-1788 (2019).

5. Dong, S. *et al.* Organocatalytic Kinetic Resolution of Sulfoximines. *J. Am. Chem. Soc.* **138**, 2166-2169 (2016).

6. Li, W. & Lam, Y. A Facile Solid-Phase Synthesis of 1,2,4,5-Tetrasubstituted Imidazoles Using Sodium Benzenesulfinate as a Traceless Linker. *J. Comb. Chem.* **7**, 644-647 (2005).

7. Sisko, J., Mellinger, M., Sheldrake, P.W. & Baine, N.H. α‐Tosylbenzyl Isocyanide: Benzene, 1‐[(isocyanophenylmethyl) sulfonyl]‐4‐methyl‐. *Org. Synth.* **77**, 198-198 (2003).

8. Qi, Z., Jiang, Y., Wang, Y. & Yan, R. tert-Butyl Nitrite Promoted Oxidative Intermolecular Sulfonamination of Alkynes to Synthesize Substituted Sulfonyl Pyrroles from the Alkynylamines and Sulfinic Acids. *J. Org. Chem.* **83**, 8636-8644 (2018).

9. Yuan, Z. *et al.* Highly Selective Pd-Catalyzed Intermolecular Fluorosulfonylation of Styrenes. *J. Am. Chem. Soc.* **137**, 2468-2471 (2015).

10. Zhao, C. *et al.* Enantioselective [3+3] atroposelective annulation catalyzed by N-heterocyclic carbenes. *Nat. Commun.* **9**, 611 (2018).

11. Jia, S. *et al.* Organocatalytic Enantioselective Construction of Axially Chiral Sulfone-Containing Styrenes. *J. Am. Chem. Soc.* **140**, 7056-7060 (2018).

12. Sakai, H. *et al.* Formation of One-Dimensional Helical Columns and Excimerlike Excited States by Racemic Quinoxaline-Fused [7]Carbohelicenes in the Crystal. *Chem. Eur. J.* **20**, 10099-10109 (2014).

13. Lee, C., Yang, W. & Parr, R.G. Development of the Colle-Salvetti correlation-energy formula into a functional of the electron density. *Phys. Rev. B* **37**, 785-789 (1988).

14. Becke, A.D. Density‐functional thermochemistry. III. The role of exact exchange. *J. Chem. Phys.* **98**, 5648-5652 (1993).

15. Stephens, P.J., Devlin, F.J., Chabalowski, C.F. & Frisch, M.J. Ab Initio Calculation of Vibrational Absorption and Circular Dichroism Spectra Using Density Functional Force Fields. *J. Phys. Chem* **98**, 11623-11627 (1994).

16. Francl, M.M. *et al.* Self‐consistent molecular orbital methods. XXIII. A polarization‐type basis set for second‐row elements. *J. Chem. Phys.* **77**, 3654-3665 (1982).

17. Hehre, W.J., Ditchfield, R. & Pople, J.A. Self—Consistent Molecular Orbital Methods. XII. Further Extensions of Gaussian—Type Basis Sets for Use in Molecular Orbital Studies of Organic Molecules. *J. Chem. Phys.* **56**, 2257-2261 (1972).

18. Hariharan, P.C. & Pople, J.A. The influence of polarization functions on molecular orbital hydrogenation energies. *Theor. Chim. Acta* **28**, 213-222 (1973).

19. Marenich, A.V., Cramer, C.J. & Truhlar, D.G. Universal Solvation Model Based on Solute Electron Density and on a Continuum Model of the Solvent Defined by the Bulk Dielectric Constant and Atomic Surface Tensions. *J. Phys. Chem. B* **113**, 6378-6396 (2009).

20. Zhao, Y. & Truhlar, D.G. The M06 suite of density functionals for main group thermochemistry, thermochemical kinetics, noncovalent interactions, excited states, and transition elements: two new functionals and systematic testing of four M06-class functionals and 12 other functionals. *Theor. Chem. Acc.* **120**, 215-241 (2008).

21. Zhao, Y. & Truhlar, D.G. Density Functionals with Broad Applicability in Chemistry. *Acc. Chem. Res.* **41**, 157-167 (2008).

22. Weigend, F. & Ahlrichs, R. Balanced basis sets of split valence, triple zeta valence and quadruple zeta valence quality for H to Rn: Design and assessment of accuracy. *Phys. Chem. Chem. Phys* **7**, 3297-3305 (2005).

23. Weigend, F. Accurate Coulomb-fitting basis sets for H to Rn. *Phys. Chem. Chem. Phys* **8**, 1057-1065 (2006).

24. Reist, M., Testa, B., Carrupt, P.-A., Jung, M. & Schurig, V. Racemization, enantiomerization, diastereomerization, and epimerization: Their meaning and pharmacological significance. *Chirality* **7**, 396-400 (1995).

25. Curran, D.P., Liu, W. & Chen, C.H.-T. Transfer of Chirality in Radical Cyclizations. Cyclization of o-Haloacrylanilides to Oxindoles with Transfer of Axial Chirality to a Newly Formed Stereocenter. *J. Am. Chem. Soc.* **121**, 11012-11013 (1999).

26. Shirakawa, S., Liu, K. & Maruoka, K. Catalytic Asymmetric Synthesis of Axially Chiral o-Iodoanilides by Phase-Transfer Catalyzed Alkylations. *J. Am. Chem. Soc.* **134**, 916-919 (2012).

27. Ma, C. *et al.* Atroposelective Access to Oxindole-Based Axially Chiral Styrenes via the Strategy of Catalytic Kinetic Resolution. *J. Am. Chem. Soc.* **142**, 15686-15696 (2020).

28. Wang, Q. *et al.* Rhodium-Catalyzed Atroposelective Oxidative C–H/C–H Cross-Coupling Reaction of 1-Aryl Isoquinoline Derivatives with Electron-Rich Heteroarenes. *J. Am. Chem. Soc.* **142**, 15678-15685 (2020).

29. Li, T. *et al.* N-Heterocyclic Carbene-Catalyzed Atroposelective Annulation for Access to Thiazine Derivatives with C−N Axial Chirality. *Angew. Chem. Int. Ed.* **60**, 9362-9367 (2021).
